# Supplementary material for: Identification of tRFs and phasiRNAs in tomato (Solanum lycopersicum) and their responses to exogenous abscisic acid
Source: BMC Plant Biol. 2020 Jul 7;20:320. doi: 10.1186/s12870-020-02528-8 (PMC7339384; doi:10.1186/s12870-020-02528-8)
Supplement: Supplementary file 1 — Additional file 1 Table S1. List of tRFs identified in this study and their expression levels. Table S2. The differential expression levels in the control (C1D) and ABA-treatment (A1D) libraries of tRFs after reducing noise. Table S3. List of differentially expressed tRFs with a minimum 10 RPM value in one library. Table S4. List of phasiRNAs identified in this study and their expression levels. Table S5. The differential expression levels in the control (C1D) and ABA-treatment (A1D) libraries of phasiRNAs. Table S6. List of differentially expressed phasiRNAs with a minimum 10 RPM value in one library. Table S7. The target genes of phasiRNAs. Table S8. The expression patterns of phasiRNAs targets [file 12870_2020_2528_MOESM1_ESM.xlsx]

## Sheet: Table S1
Table S1 List of tRFs identified in this study and their expression levels
tRF ID	Sequence	length	tRNA type	tRF type	C1D-counts	C1D-RPM	A1D-counts	A1D-RPM	fold-change(log2 A1D/C1D)	p value
ENSRNA049441319:1-21	CCGACCTTAGCTCAGTTGGTA	21	TyrGTA	5e;	11	5.37	12	6.59	0.295356	0.371353
ENSRNA049441319:16-36	TTGGTAGAGCGGAGGACTGTA	21	TyrGTA	D;	2	0.98	0	0.01	-6.61471	0.36919
ENSRNA049441319:26-47	GGAGGACTGTAGTTTGATTGCT	22	TyrGTA	Others;	1	0.49	0	0.01	-5.61471	0.648401
ENSRNA049441414:11-34	TGTAGTCGGTTATCACGTCAGTCT	24	ValAAC	D;	3	1.47	1	0.55	-1.41831	0.572292
ENSRNA049441414:1-24	GGTTTCGTGGTGTAGTCGGTTATC	24	ValAAC	5e;	0	0.01	1	0.55	5.78136	0.370857
ENSRNA049441414:38-56	ACACTGAAGGTCTCCGGTT	19	ValAAC	A;	3	1.47	2	1.1	-0.418313	0.962085
ENSRNA049441542:14-37	AGTTGGTTAGAGCGTCGTGCTAAT	24	IleAAT	D;	1	0.49	2	1.1	1.16665	0.432483
ENSRNA049441542:42-61	CGAAGGTCGCAGGTTCGAGA	20	IleAAT	V;	1	0.49	0	0.01	-5.61471	0.648401
ENSRNA049441542:52-74	AGGTTCGAGACCTGCATGGGCCA	23	IleAAT	3e;	1	0.49	0	0.01	-5.61471	0.648401
ENSRNA049441542:54-68	GTTCGAGACCTGCAT	15	IleAAT	V;3e;	0	0.01	1	0.55	5.78136	0.370857
ENSRNA049441632:55-70	TTCGAGACCTGCATGG	16	IleAAT	V;3e;	0	0.01	1	0.55	5.78136	0.370857
ENSRNA049441652:12-35	ATAGTGGTAAGTATTCCCGCCTGT	24	AspGTC	D;	1	0.49	1	0.55	0.16665	0.793178
ENSRNA049441652:1-25	GTCGTTGTAGTATAGTGGTAAGTAT	25	AspGTC	5e;	96	46.9	116	63.71	0.441932	0.000651715
ENSRNA049441652:14-40	AGTGGTAAGTATTCCCGCCTGTCACGC	27	AspGTC	Others;	0	0.01	1	0.55	5.78136	0.370857
ENSRNA049441652:29-51	CGCCTGTCACGCGGGTGACCCGG	23	AspGTC	A;	0	0.01	2	1.1	6.78136	0.159696
ENSRNA049441652:39-66	GCGGGTGACCCGGGTTCGATCCCCGGCA	28	AspGTC	Others;	1	0.49	9	4.94	3.33366	0.00293487
ENSRNA049441732:1-20	GTCAAGATGGCCGAGTTGGT	20	LeuCAG	5e;	17	8.3	14	7.69	-0.110128	0.791526
ENSRNA049441732:37-53	AGGTACTGGTCCGAAAG	17	LeuCAG	A;	1	0.49	0	0.01	-5.61471	0.648401
ENSRNA049441732:45-64	GTCCGAAAGGGCATGGGTTC	20	LeuCAG	A;V;	2	0.98	0	0.01	-6.61471	0.36919
ENSRNA049441739:1-21	GTGGACGTGCCGGAGTGGTTA	21	SerAGA	5e;	1066	520.75	839	460.77	-0.176544	0.385622
ENSRNA049441739:31-53	ACTAGAAATCATGTGGGCTCTGC	23	SerAGA	A;	1	0.49	0	0.01	-5.61471	0.648401
ENSRNA049441739:43-63	GTGGGCTCTGCCCGCGCAGGT	21	SerAGA	A;V;	0	0.01	1	0.55	5.78136	0.370857
ENSRNA049441739:47-71	GCTCTGCCCGCGCAGGTTCGAATCC	25	SerAGA	V;	0	0.01	1	0.55	5.78136	0.370857
ENSRNA049441739:63-77	TTCGAATCCTGCCGT	15	SerAGA	V;3e;	0	0.01	1	0.55	5.78136	0.370857
ENSRNA049441822:1-19	GCGCCTGTAGCTCAGTGGA	19	ArgCCT	5e;	169	82.56	101	55.47	-0.573735	0.0610839
ENSRNA049441822:17-37	GGATAGAGCGTCTGTTTCCTA	21	ArgCCT	Others;	0	0.01	1	0.55	5.78136	0.370857
ENSRNA049441822:39-55	GCAGAAGGTCGTAGGTT	17	ArgCCT	A;	36	17.59	15	8.24	-1.09404	0.0502421
ENSRNA049441822:59-72	CCCCTACCTGGCGC	14	ArgCCT	3e;	2	0.98	1	0.55	-0.83335	0.846126
ENSRNA049441856:11-31	TGTAGTGGTTAGCACTCTGGA	21	GlnTTG	D;	5	2.44	0	0.01	-7.93074	0.0681507
ENSRNA049441856:1-22	GGTTCTATGGTGTAGTGGTTAG	22	GlnTTG	5e;	6	2.93	4	2.2	-0.413397	0.897698
ENSRNA049441856:18-40	GTTAGCACTCTGGACTTTGAATC	23	GlnTTG	Others;	1	0.49	2	1.1	1.16665	0.432483
ENSRNA049441856:28-50	TGGACTTTGAATCCAGCGACCTG	23	GlnTTG	A;	1	0.49	0	0.01	-5.61471	0.648401
ENSRNA049441906:1-23	GTACCAGTGGTCTAGTGGTAGAA	23	GlyGCC	5e;	6	2.93	5	2.75	-0.091469	0.836866
ENSRNA049441906:22-41	AATAGTACCCTGCCACGGTA	20	GlyGCC	Others;	1	0.49	5	2.75	2.48858	0.0563144
ENSRNA049441906:54-71	CGATTCCCGGCTGGTGCA	18	GlyGCC	3e;	1	0.49	1	0.55	0.16665	0.793178
ENSRNA049441922:1-21	GCCCGTCTAGCTCAGTTGGTA	21	LysCTT	5e;	15	7.33	8	4.39	-0.739592	0.452763
ENSRNA049441922:13-33	CAGTTGGTAGAGCGCAAGGCT	21	LysCTT	D;	1	0.49	0	0.01	-5.61471	0.648401
ENSRNA049441922:25-43	CGCAAGGCTCTTAACCTTG	19	LysCTT	Others;	0	0.01	1	0.55	5.78136	0.370857
ENSRNA049441922:30-50	GGCTCTTAACCTTGTGGTCGT	21	LysCTT	A;	1	0.49	2	1.1	1.16665	0.432483
ENSRNA049441922:39-56	CCTTGTGGTCGTGGGTTC	18	LysCTT	A;	3	1.47	1	0.55	-1.41831	0.572292
ENSRNA049441992:1-20	GCTGGAATAGCTCAGTTGGT	20	AsnGTT	5e;	55	26.87	38	20.87	-0.364566	0.683554
ENSRNA049441992:17-42	TGGTTAGAGCATGTGGCTGTTAACCA	26	AsnGTT	Others;	0	0.01	1	0.55	5.78136	0.370857
ENSRNA049441992:32-53	GCTGTTAACCACAAGGTCGGAG	22	AsnGTT	A;	2	0.98	2	1.1	0.16665	0.743124
ENSRNA049441992:41-58	CACAAGGTCGGAGGTTCA	18	AsnGTT	A;	1	0.49	2	1.1	1.16665	0.432483
ENSRNA049442006:1-20	GCTTCCGTAGCATAGTGGTA	20	ThrCGT	5e;	7	3.42	1	0.55	-2.63649	0.0982081
ENSRNA049442006:53-72	TTCGATCCTCGCCGGGAGCT	20	ThrCGT	3e;	1	0.49	1	0.55	0.16665	0.793178
ENSRNA049442061:1-19	GCGCCCATTGCCTAATGGA	19	ArgTCT	5e;	14	6.84	10	5.49	-0.31719	0.922416
ENSRNA049442061:12-30	CTAATGGATAAGGCGCTTG	19	ArgTCT	D;	1	0.49	1	0.55	0.16665	0.793178
ENSRNA049442061:21-40	AAGGCGCTTGACTTCTAATC	20	ArgTCT	Others;	1	0.49	3	1.65	1.75161	0.225388
ENSRNA049442061:38-55	ATCAAGCGATTGTGGGTT	18	ArgTCT	A;	11	5.37	5	2.75	-0.96549	0.374586
ENSRNA049442243:1-20	TTCGTTATCGTCCAGCGGTT	20	GluTTC	5e;	70	34.2	46	25.26	-0.437142	0.470017
ENSRNA049442243:15-37	GCGGTTAGGATATCTGGCTTTCA	23	GluTTC	Others;	2	0.98	0	0.01	-6.61471	0.36919
ENSRNA049442243:30-51	GGCTTTCACCCAGGAGACCCGG	22	GluTTC	A;	1	0.49	1	0.55	0.16665	0.793178
ENSRNA049442243:39-63	CCAGGAGACCCGGGTTCGATTCCCG	25	GluTTC	V;	0	0.01	1	0.55	5.78136	0.370857
ENSRNA049442273:1-20	GCGTTTGTAGTCCAACGGTT	20	GlyTCC	5e;	2539	1240.33	1925	1057.2	-0.230476	0.931811
ENSRNA049442273:14-37	AACGGTTAGGATAATTGCCTTCCA	24	GlyTCC	D;	0	0.01	1	0.55	5.78136	0.370857
ENSRNA049442273:34-54	TCCAAGCAATAGATCCGGGTT	21	GlyTCC	A;	9	4.4	6	3.3	-0.415037	0.853891
ENSRNA049442273:54-71	TCGACTCCCGGCAGACGC	18	GlyTCC	3e;	2	0.98	1	0.55	-0.83335	0.846126
ENSRNA049442298:1-19	GCCCCTATAGCTCAGTGGT	19	ThrTGT	5e;	6	2.93	7	3.84	0.390206	0.42545
ENSRNA049442298:33-51	TGTAAACTGGAGGTCTGTA	19	ThrTGT	A;	4	1.95	2	1.1	-0.825971	0.71031
ENSRNA049442298:38-58	ACTGGAGGTCTGTAGTTCGAT	21	ThrTGT	Others;	1	0.49	1	0.55	0.16665	0.793178
ENSRNA049442298:44-71	GGTCTGTAGTTCGATCCTGCATGGGGGC	28	ThrTGT	V;3e;	2	0.98	5	2.75	1.48858	0.143129
ENSRNA049442319:1-20	GTCGATATGTCCGAGTGGTT	20	SerTGA	5e;	41	20.03	40	21.97	0.133372	0.247642
ENSRNA049442319:34-51	TGAAATCTGTTGGGCTTC	18	SerTGA	A;	34	16.61	15	8.24	-1.01134	0.0814949
ENSRNA049442319:47-63	GCTTCGCCCGCGCAGGT	17	SerTGA	A;V;	0	0.01	1	0.55	5.78136	0.370857
ENSRNA049442319:63-79	TTCGAACCCTGCTGTCG	17	SerTGA	3e;	6	2.93	8	4.39	0.58332	0.287685
ENSRNA049442319:68-82	ACCCTGCTGTCGACG	15	SerTGA	3e;	10	4.89	3	1.65	-1.56737	0.166451
ENSRNA049442379:1-25	GTCGTTGTAGTATAGTGGTAAGTAT	25	AspGTC	5e;	105	51.29	120	65.9	0.361601	0.00195292
ENSRNA049442379:14-36	AGTGGTAAGTATTCCCGCCTGTC	23	AspGTC	D;	1	0.49	0	0.01	-5.61471	0.648401
ENSRNA049442379:29-51	CGCCTGTCACGCGGGTGACCCGG	23	AspGTC	A;	1	0.49	1	0.55	0.16665	0.793178
ENSRNA049442379:39-59	GCGGGTGACCCGGGTTCGATC	21	AspGTC	Others;	0	0.01	1	0.55	5.78136	0.370857
ENSRNA049442379:55-70	CGATCCCCGGCAGCGG	16	AspGTC	3e;	6	2.93	6	3.3	0.171565	0.608265
ENSRNA049442433:1-20	GACTCCGTGGCCCAATGGAT	20	ArgACG	5e;	4	1.95	3	1.65	-0.241008	0.95519
ENSRNA049442433:29-51	GGTCTACGAAACCAGAGATTCTG	23	ArgACG	A;	0	0.01	1	0.55	5.78136	0.370857
ENSRNA049442433:58-72	ATCCCCAGCGGAGTC	15	ArgACG	3e;	1	0.49	0	0.01	-5.61471	0.648401
ENSRNA049442496:1-21	GCGTCTGTAGTCCAACGGTTA	21	GlyTCC	5e;	2697	1317.52	2162	1187.36	-0.150067	0.0436278
ENSRNA049442496:25-44	TAATTGCCTTCCAAGCAATA	20	GlyTCC	Others;	1	0.49	2	1.1	1.16665	0.432483
ENSRNA049442496:34-56	TCCAAGCAATAGACCCGGGTTCG	23	GlyTCC	A;	2	0.98	1	0.55	-0.83335	0.846126
ENSRNA049442496:52-67	GTTCGACTCCCGGCAG	16	GlyTCC	V;3e;	0	0.01	1	0.55	5.78136	0.370857
ENSRNA049442587:11-30	CCGAGTGGTCTAAGGCGCCA	20	LeuTAG	D;	0	0.01	1	0.55	5.78136	0.370857
ENSRNA049442587:1-19	GACAGTTTGGCCGAGTGGT	19	LeuTAG	5e;	52	25.4	36	19.77	-0.361516	0.699453
ENSRNA049442587:22-42	AAGGCGCCAGATTTAGGCTCT	21	LeuTAG	Others;	1	0.49	0	0.01	-5.61471	0.648401
ENSRNA049442587:30-50	AGATTTAGGCTCTGGTCCGAA	21	LeuTAG	A;	7	3.42	6	3.3	-0.0515303	0.79108
ENSRNA049442587:48-64	GAAAGGGCGTGGGTTCA	17	LeuTAG	A;V;	19	9.28	13	7.14	-0.378201	0.809304
ENSRNA049442608:1-22	GCTGGTTTGCCCGAGTGGTTAA	22	LeuTAA	5e;	0	0.01	1	0.55	5.78136	0.370857
ENSRNA049442608:18-39	GTTAAGGGGGAAGACTTAAGAT	22	LeuTAA	Others;	1	0.49	0	0.01	-5.61471	0.648401
ENSRNA049442608:29-54	AGACTTAAGATCTTCTGCACACAAGT	26	LeuTAA	A;	0	0.01	2	1.1	6.78136	0.159696
ENSRNA049442608:34-48	TAAGATCTTCTGCAC	15	LeuTAA	A;	1	0.49	0	0.01	-5.61471	0.648401
ENSRNA049442622:1-25	GGGTCCATAGCTCAGTGGTAGAGCA	25	CysGCA	Others;	38	18.56	48	26.36	0.506154	0.0174552
ENSRNA049442622:16-35	TGGTAGAGCATTTGACTGCA	20	CysGCA	D;	118	57.64	115	63.16	0.131941	0.0524991
ENSRNA049442622:25-41	ATTTGACTGCAGATCAA	17	CysGCA	Others;	7	3.42	10	5.49	0.68281	0.191931
ENSRNA049442622:50-71	CGGTTCGAACCCGGTTGGGCCC	22	CysGCA	3e;	1	0.49	1	0.55	0.16665	0.793178
ENSRNA049442654:1-20	GTTGCTGTGGTGTAGTGGTT	20	ValTAC	5e;	20	9.77	13	7.14	-0.452434	0.698468
ENSRNA049442654:13-34	TAGTGGTTATCACGTCAGTCTT	22	ValTAC	D;	2	0.98	1	0.55	-0.83335	0.846126
ENSRNA049442654:31-52	TCTTACACACTGAAGGTCCCCA	22	ValTAC	A;	2	0.98	0	0.01	-6.61471	0.36919
ENSRNA049442654:53-72	GTTCGATCCTGGGCAGCAAC	20	ValTAC	3e;	1	0.49	1	0.55	0.16665	0.793178
ENSRNA049442665:1-22	TCCGTTGTAGTCTAGTTGGTTA	22	GluCTC	5e;	70	34.2	71	38.99	0.189108	0.0803543
ENSRNA049442665:14-34	AGTTGGTTAGGATACTCGGCT	21	GluCTC	D;	11	5.37	10	5.49	0.0318841	0.653633
ENSRNA049442665:22-41	AGGATACTCGGCTCTCACCC	20	GluCTC	Others;	5	2.44	5	2.75	0.17255	0.636123
ENSRNA049442665:33-52	CTCTCACCCGAGAGACCCGG	20	GluCTC	A;	1	0.49	0	0.01	-5.61471	0.648401
ENSRNA049442689:1-21	ATCAGAGTGGCGCAGCGGAAG	21	MetCAT	5e;	22	10.75	11	6.04	-0.831716	0.275794
ENSRNA049442689:15-37	GCGGAAGCGTGGTGGGCCCATAA	23	MetCAT	Others;	3	1.47	9	4.94	1.74869	0.0285583
ENSRNA049442689:40-60	CACAGGTCCCAGGATCGAAAC	21	MetCAT	V;	1	0.49	0	0.01	-5.61471	0.648401
ENSRNA049442689:49-70	CAGGATCGAAACCTGGCTCTGA	22	MetCAT	3e;	1	0.49	0	0.01	-5.61471	0.648401
ENSRNA049442702:1-21	GCTGGTTTGCCCGAGAGGTTA	21	LeuTAA	5e;	12	5.86	14	7.69	0.392083	0.264657
ENSRNA049442702:16-36	AGGTTAAGGGGGAAGACTTAA	21	LeuTAA	D;	4	1.95	1	0.55	-1.82597	0.377396
ENSRNA049442702:20-41	TAAGGGGGAAGACTTAAGATCT	22	LeuTAA	Others;	1	0.49	1	0.55	0.16665	0.793178
ENSRNA049442702:30-54	GACTTAAGATCTTCTGCACATAAGT	25	LeuTAA	A;	0	0.01	1	0.55	5.78136	0.370857
ENSRNA049442702:43-63	CTGCACATAAGTGCGCGTGGG	21	LeuTAA	A;V;	0	0.01	1	0.55	5.78136	0.370857
ENSRNA049442702:50-70	TAAGTGCGCGTGGGTTCGAAC	21	LeuTAA	V;	0	0.01	1	0.55	5.78136	0.370857
ENSRNA049442702:67-83	GAACCCCACAGCCAGCA	17	LeuTAA	3e;	1	0.49	0	0.01	-5.61471	0.648401
ENSRNA049442789:1-24	GTCGCTTTGGCCGAGTGGTTAAGG	24	SerGCT	5e;	3	1.47	2	1.1	-0.418313	0.962085
ENSRNA049442789:33-53	TGCTAAGTACATGGGGTTTCC	21	SerGCT	A;	0	0.01	1	0.55	5.78136	0.370857
ENSRNA049442789:47-65	GGTTTCCCCGCGAGAGTTC	19	SerGCT	A;V;	0	0.01	1	0.55	5.78136	0.370857
ENSRNA049442789:61-75	AGTTCGAATCTCTCA	15	SerGCT	V;3e;	0	0.01	1	0.55	5.78136	0.370857
ENSRNA049442803:1-20	GCGTTTGTAGTCCAACGGTT	20	GlyTCC	5e;	2528	1234.96	2022	1110.47	-0.153294	0.0604346
ENSRNA049442803:15-38	ACGGTTAGGATAATTGCCTTCCAA	24	GlyTCC	Others;	0	0.01	1	0.55	5.78136	0.370857
ENSRNA049442803:34-56	TCCAAGCAATAGACCCGGGTTCG	23	GlyTCC	A;	1	0.49	1	0.55	0.16665	0.793178
ENSRNA049442803:58-72	CTCCCGGCAGACGCA	15	GlyTCC	3e;	3	1.47	1	0.55	-1.41831	0.572292
ENSRNA049442809:1-21	GCGTCTGTAGTCCAACGGTTA	21	GlyTCC	5e;	2679	1308.72	2152	1181.86	-0.147097	0.0372433
ENSRNA049442809:20-40	TAGGATAATTGCCTTCCAAGC	21	GlyTCC	Others;	2	0.98	0	0.01	-6.61471	0.36919
ENSRNA049442809:33-54	TTCCAAGCAATAGACCCGGGTT	22	GlyTCC	A;	0	0.01	4	2.2	7.78136	0.0296122
ENSRNA049442809:38-61	AGCAATAGACCCGGGTTCGACTCC	24	GlyTCC	Others;	0	0.01	1	0.55	5.78136	0.370857
ENSRNA049442809:55-70	CGACTCCCGGCAGACG	16	GlyTCC	3e;	4	1.95	2	1.1	-0.825971	0.71031
ENSRNA049442840:1-21	GCCCGTCTAGCTCAGTTGGTA	21	LysCTT	5e;	13	6.35	8	4.39	-0.532536	0.682329
ENSRNA049442840:13-33	CAGTTGGTAGAGCGCAAGGCT	21	LysCTT	D;	1	0.49	0	0.01	-5.61471	0.648401
ENSRNA049442840:27-51	CAAGGCTCTTAACCTTGTGGTCGTG	25	LysCTT	A;	0	0.01	2	1.1	6.78136	0.159696
ENSRNA049442840:40-57	CTTGTGGTCGTGGGTTCG	18	LysCTT	A;	1	0.49	1	0.55	0.16665	0.793178
ENSRNA049442854:1-21	GTCTGGGTGGTGTAGTCGGTT	21	ValCAC	5e;	659	321.93	570	313.04	-0.0404	0.0189396
ENSRNA049442854:30-52	AGTCTCACACACTAGAGGTCCCC	23	ValCAC	A;	0	0.01	1	0.55	5.78136	0.370857
ENSRNA049442854:36-58	ACACACTAGAGGTCCCCGGTTCG	23	ValCAC	A;	0	0.01	1	0.55	5.78136	0.370857
ENSRNA049442854:51-72	CCGGTTCGAACCCGGGCTCAGA	22	ValCAC	3e;	0	0.01	1	0.55	5.78136	0.370857
ENSRNA049442867:1-21	GGTTTCGTGGTGTAGTTGGTT	21	ValAAC	5e;	75	36.64	66	36.25	-0.0154385	0.363989
ENSRNA049442867:19-42	GTTATCACGTCAGTCTAACACACT	24	ValAAC	Others;	1	0.49	0	0.01	-5.61471	0.648401
ENSRNA049442867:38-58	ACACTGAAGGTCTCCGGTTCG	21	ValAAC	A;	3	1.47	3	1.65	0.16665	0.702215
ENSRNA049442867:54-73	GTTCGAGTCCGGGCGAAGCC	20	ValAAC	3e;	1	0.49	1	0.55	0.16665	0.793178
ENSRNA049442922:1-17	TCCGTTATCGTCCAGCG	17	GluTTC	5e;	431	210.55	92	50.53	-2.05895	3.22e-35
ENSRNA049442922:16-41	CGGTTAGGATATCTGGCTTTCACCCA	26	GluTTC	Others;	0	0.01	1	0.55	5.78136	0.370857
ENSRNA049442922:25-46	TATCTGGCTTTCACCCAGGAGA	22	GluTTC	Others;	0	0.01	1	0.55	5.78136	0.370857
ENSRNA049442922:30-51	GGCTTTCACCCAGGAGACCCGG	22	GluTTC	A;	1	0.49	2	1.1	1.16665	0.432483
ENSRNA049442922:40-57	CAGGAGACCCGGGTTCGA	18	GluTTC	Others;	1	0.49	0	0.01	-5.61471	0.648401
ENSRNA049443021:1-20	GACCGCATAGCGCAGTGGAT	20	ArgTCG	5e;	102	49.83	64	35.15	-0.50349	0.246099
ENSRNA049443021:23-40	GCGCGTCTGACTTCGGAT	18	ArgTCG	Others;	1	0.49	0	0.01	-5.61471	0.648401
ENSRNA049443021:39-56	ATCAGAAGGTCGTGGGTT	18	ArgTCG	A;	14	6.84	6	3.3	-1.05153	0.260855
ENSRNA049443021:55-70	TTCGACTCCCACTGTG	16	ArgTCG	V;3e;	0	0.01	1	0.55	5.78136	0.370857
ENSRNA049443021:60-74	CTCCCACTGTGGTCG	15	ArgTCG	3e;	0	0.01	1	0.55	5.78136	0.370857
ENSRNA049443034:11-29	TCCAGCGGTTAGGATATCT	19	GluTTC	D;	1	0.49	1	0.55	0.16665	0.793178
ENSRNA049443034:1-20	TCCGTCATCGTCCAGCGGTT	20	GluTTC	5e;	3	1.47	4	2.2	0.581687	0.44924
ENSRNA049443034:16-35	CGGTTAGGATATCTGGCTTT	20	GluTTC	D;	0	0.01	3	1.65	7.36632	0.0687674
ENSRNA049443034:21-41	AGGATATCTGGCTTTCACCCA	21	GluTTC	Others;	1	0.49	3	1.65	1.75161	0.225388
ENSRNA049443034:30-51	GGCTTTCACCCAGGAGACCCGG	22	GluTTC	A;	6	2.93	5	2.75	-0.091469	0.836866
ENSRNA049443034:41-60	AGGAGACCCGGGTTCGATTC	20	GluTTC	V;	1	0.49	0	0.01	-5.61471	0.648401
ENSRNA049443034:53-68	TTCGATTCCCGGTAAC	16	GluTTC	V;3e;	0	0.01	1	0.55	5.78136	0.370857
ENSRNA049443103:1-24	GGGGGTGTAGCTCATATGGTAGAG	24	AlaCGC	5e;	1604	783.57	1542	846.86	0.112061	1.87e-11
ENSRNA049443103:42-56	AGAGGCACGGGGTTC	15	AlaCGC	A;V;	3	1.47	1	0.55	-1.41831	0.572292
ENSRNA049443110:12-32	CTAGTGGTATGATTCTCGCTT	21	ProCGG	D;	0	0.01	2	1.1	6.78136	0.159696
ENSRNA049443110:1-25	GGGTGTTTGGTCTAGTGGTATGATT	25	ProCGG	5e;	1	0.49	2	1.1	1.16665	0.432483
ENSRNA049443110:20-37	ATGATTCTCGCTTCGGGT	18	ProCGG	Others;	3	1.47	0	0.01	-7.19967	0.210212
ENSRNA049443110:31-49	TTCGGGTGCGAGAGGTCGT	19	ProCGG	A;	4	1.95	2	1.1	-0.825971	0.71031
ENSRNA049443135:1-19	GGTCCCATGGTCTAGTGGT	19	GlnCTG	5e;	4	1.95	1	0.55	-1.82597	0.377396
ENSRNA049443135:12-32	CTAGTGGTTAGGACATTGGAC	21	GlnCTG	D;	2	0.98	3	1.65	0.751612	0.448333
ENSRNA049443135:23-46	GACATTGGACTCTGAATCCAGTAA	24	GlnCTG	Others;	2	0.98	0	0.01	-6.61471	0.36919
ENSRNA049443135:30-55	GACTCTGAATCCAGTAACCCGAGTTC	26	GlnCTG	A;	0	0.01	1	0.55	5.78136	0.370857
ENSRNA049443135:49-69	CGAGTTCAAGTCTCGGTGGGA	21	GlnCTG	V;3e;	1	0.49	0	0.01	-5.61471	0.648401
ENSRNA049443146:1-20	GGCCCATTAGCTCAGTTGGT	20	IleAAT	5e;	9	4.4	9	4.94	0.167008	0.537964
ENSRNA049443146:13-30	CAGTTGGTTAGAGCGTCG	18	IleAAT	D;	0	0.01	1	0.55	5.78136	0.370857
ENSRNA049443146:17-36	TGGTTAGAGCGTCGTGCTAA	20	IleAAT	D;	1	0.49	1	0.55	0.16665	0.793178
ENSRNA049443146:36-59	ATAACGCGAAGGTCGCAGGTTCGA	24	IleAAT	A;	0	0.01	1	0.55	5.78136	0.370857
ENSRNA049443178:1-28	GGGCATTTGGTCTAGTGGTATGATTCTC	28	ProTGG	Others;	0	0.01	7	3.84	8.58496	0.00236448
ENSRNA049443178:14-33	AGTGGTATGATTCTCGCTTT	20	ProTGG	D;	5	2.44	4	2.2	-0.149378	0.890402
ENSRNA049443178:22-39	GATTCTCGCTTTGGGTGC	18	ProTGG	Others;	0	0.01	1	0.55	5.78136	0.370857
ENSRNA049443178:31-53	TTTGGGTGCGAGAGGTCCCGAGT	23	ProTGG	A;	0	0.01	1	0.55	5.78136	0.370857
ENSRNA049443178:51-67	AGTTCGATTCTCGGAAT	17	ProTGG	V;3e;	2	0.98	0	0.01	-6.61471	0.36919
ENSRNA049443263:1-23	GGTTTCGTGGTGTAGTTGGTTAT	23	ValAAC	5e;	39	19.05	26	14.28	-0.415795	0.636604
ENSRNA049443263:17-37	TGGTTATCACGTCAGTCTAAC	21	ValAAC	D;	1	0.49	0	0.01	-5.61471	0.648401
ENSRNA049443263:37-56	CACACTGAAGGTCTCCGGTT	20	ValAAC	A;	2	0.98	1	0.55	-0.83335	0.846126
ENSRNA049443345:1-24	GCGCATCTGGTGTAGTGGTATCAT	24	GlyCCC	5e;	36	17.59	35	19.22	0.127853	0.284868
ENSRNA049443345:19-39	TATCATAGTACCCTCCCACGG	21	GlyCCC	Others;	0	0.01	1	0.55	5.78136	0.370857
ENSRNA049443345:27-48	TACCCTCCCACGGTACTGACCG	22	GlyCCC	A;	1	0.49	1	0.55	0.16665	0.793178
ENSRNA049443345:37-57	CGGTACTGACCGGGGTTCGAT	21	GlyCCC	Others;	1	0.49	1	0.55	0.16665	0.793178
ENSRNA049443345:52-71	TTCGATTCCCCGGATGCGCA	20	GlyCCC	3e;	1	0.49	0	0.01	-5.61471	0.648401
ENSRNA049443377:1-19	GTCAGGATGGCCGAGTGGT	19	LeuCAA	5e;	78	38.1	67	36.8	-0.0500852	0.438166
ENSRNA049443377:30-50	AGACTCAAGTTCTGGTCTTCG	21	LeuCAA	A;	9	4.4	5	2.75	-0.678072	0.625315
ENSRNA049443377:47-68	TTCGTAAGAGGGCGTGGGTTCA	22	LeuCAA	A;V;	9	4.4	30	16.48	1.90514	1.96e-05
ENSRNA049443386:1-21	CCGACCTTAGCTCAGTTGGTA	21	TyrGTA	5e;	10	4.89	6	3.3	-0.567368	0.696407
ENSRNA049443386:21-42	AGAGCGGAAGACTGTAGTGTGA	22	TyrGTA	Others;	1	0.49	0	0.01	-5.61471	0.648401
ENSRNA049443386:29-50	AGACTGTAGTGTGAATGCTGGA	22	TyrGTA	A;	1	0.49	0	0.01	-5.61471	0.648401
ENSRNA049443386:69-84	CGAATCCGGCAGGTCG	16	TyrGTA	Others;	0	0.01	1	0.55	5.78136	0.370857
ENSRNA049443411:1-23	GGTGTCGTGGTGTAGTTGGTTAT	23	ValAAC	5e;	1119	546.64	966	530.52	-0.0431839	0.00261154
ENSRNA049443411:55-73	TTCGAGTCCGGGCGACGCC	19	ValAAC	3e;	0	0.01	3	1.65	7.36632	0.0687674
ENSRNA049443480:1-18	GCGGGGATAGCTCAGTTG	18	PheGAA	5e;	721	352.22	389	213.64	-0.721295	5.35e-08
ENSRNA049443480:14-34	AGTTGGGAGAGCGTCAGACTG	21	PheGAA	D;	1	0.49	0	0.01	-5.61471	0.648401
ENSRNA049443480:28-51	CAGACTGAAGATCTGAAGGTCACG	24	PheGAA	A;	1	0.49	0	0.01	-5.61471	0.648401
ENSRNA049443480:38-56	ATCTGAAGGTCACGTGTTC	19	PheGAA	A;	2	0.98	1	0.55	-0.83335	0.846126
ENSRNA049443502:1-18	GCGGGGATAGCTCAGTTG	18	PheGAA	5e;	771	376.64	380	208.69	-0.851825	3.25e-12
ENSRNA049443502:14-35	AGTTGGGAGAGCGTCAGACTGA	22	PheGAA	D;	1	0.49	0	0.01	-5.61471	0.648401
ENSRNA049443502:22-40	GAGCGTCAGACTGAAGATC	19	PheGAA	Others;	0	0.01	1	0.55	5.78136	0.370857
ENSRNA049443589:1-23	GGTGTCGTGGTGTAGTTGGTTAT	23	ValAAC	5e;	1140	556.9	941	516.79	-0.10784	0.0468978
ENSRNA049443589:18-38	GGTTATCACGTCAGTCTAACA	21	ValAAC	Others;	1	0.49	0	0.01	-5.61471	0.648401
ENSRNA049443589:38-58	ACACTGAAGGTCTCCGGTTCG	21	ValAAC	A;	4	1.95	0	0.01	-7.60733	0.119692
ENSRNA049443589:54-71	GTTCGAACCCGGGCGACG	18	ValAAC	3e;	0	0.01	1	0.55	5.78136	0.370857
ENSRNA049443589:58-73	GAACCCGGGCGACGCC	16	ValAAC	3e;	1	0.49	1	0.55	0.16665	0.793178
ENSRNA049443600:1-18	GTTGAGATGGCCGAGTTG	18	LeuAAG	5e;	86	42.01	65	35.7	-0.234809	0.990873
ENSRNA049443600:24-47	AGGCGCCAGATTAAGGTTCTGGTC	24	LeuAAG	Others;	0	0.01	1	0.55	5.78136	0.370857
ENSRNA049443600:31-54	AGATTAAGGTTCTGGTCCGAAAGG	24	LeuAAG	A;	0	0.01	1	0.55	5.78136	0.370857
ENSRNA049443600:47-65	CCGAAAGGGCGTGGGTTCA	19	LeuAAG	A;V;	12	5.86	9	4.94	-0.24639	0.982833
ENSRNA049443612:1-20	GCTGGAATAGCTCAGTTGGT	20	AsnGTT	5e;	48	23.45	38	20.87	-0.168157	0.818864
ENSRNA049443612:16-39	TTGGTTAGAGCGTGTGGCTGTTAA	24	AsnGTT	Others;	0	0.01	1	0.55	5.78136	0.370857
ENSRNA049443612:30-51	TGGCTGTTAACCACAAGGTCGG	22	AsnGTT	A;	1	0.49	2	1.1	1.16665	0.432483
ENSRNA049443612:38-58	AACCACAAGGTCGGAGGTTCA	21	AsnGTT	A;	5	2.44	2	1.1	-1.14938	0.509609
ENSRNA049443612:58-74	AAGCCCTCCTTCTAGCG	17	AsnGTT	3e;	1	0.49	0	0.01	-5.61471	0.648401
ENSRNA049443628:1-20	GCCGTCTTAGCTCAGTGGTA	20	LysTTT	5e;	9	4.4	10	5.49	0.319303	0.392903
ENSRNA049443628:12-31	TCAGTGGTAGAGCGCGTGGC	20	LysTTT	D;	2	0.98	2	1.1	0.16665	0.743124
ENSRNA049443628:39-56	CACGTGGTCGTGGGTTCG	18	LysTTT	A;	1	0.49	0	0.01	-5.61471	0.648401
ENSRNA049443628:53-71	TTCGATCCCCACAGACGGC	19	LysTTT	3e;	3	1.47	0	0.01	-7.19967	0.210212
ENSRNA049443699:1-20	GGGGATGTAGCTCAGATGGT	20	AlaAGC	5e;	61730	30155.8	44682	24539.1	-0.297355	1.58e-12
ENSRNA049443699:38-57	TGCGAGAGGTACGGGGATCG	20	AlaAGC	A;	17	8.3	10	5.49	-0.596305	0.55707
ENSRNA049443699:56-72	CGATACCCCGCATCTCC	17	AlaAGC	3e;	2	0.98	0	0.01	-6.61471	0.36919
ENSRNA049443924:1-21	GGCCCATTAGCTCAGTTGGTT	21	IleAAT	5e;	12	5.86	13	7.14	0.285023	0.360913
ENSRNA049443924:15-31	GTTGGTTAGAGCGTCGT	17	IleAAT	D;	1	0.49	0	0.01	-5.61471	0.648401
ENSRNA049443924:41-60	GCGAAGGTCGCAGGTTCGGG	20	IleAAT	V;	2	0.98	0	0.01	-6.61471	0.36919
ENSRNA049443924:55-69	TTCGGGACCTGCATG	15	IleAAT	V;3e;	4	1.95	5	2.75	0.495957	0.443816
ENSRNA049444021:13-34	CAGTTGGTTAGAGCACCCGTTT	22	ThrAGT	D;	0	0.01	1	0.55	5.78136	0.370857
ENSRNA049444021:36-51	GTAAGCGGGAGGTCTT	16	ThrAGT	A;	1	0.49	0	0.01	-5.61471	0.648401
ENSRNA049444021:38-59	AAGCGGGAGGTCTTGAGTTCGA	22	ThrAGT	A;	1	0.49	0	0.01	-5.61471	0.648401
ENSRNA049444052:1-20	GACCGCATAGCGCAGTGGAT	20	ArgTCG	5e;	110	53.74	74	40.64	-0.403096	0.444197
ENSRNA049444052:20-41	TTAGCGCGTTTGACTTCGGATC	22	ArgTCG	Others;	1	0.49	0	0.01	-5.61471	0.648401
ENSRNA049444052:30-51	TGACTTCGGATCAAAAGGTCGT	22	ArgTCG	A;	1	0.49	1	0.55	0.16665	0.793178
ENSRNA049444052:40-57	TCAAAAGGTCGTGGGTTC	18	ArgTCG	A;	5	2.44	1	0.55	-2.14938	0.244231
ENSRNA049444052:57-72	CGACTCCCACTGTGGT	16	ArgTCG	3e;	1	0.49	0	0.01	-5.61471	0.648401
ENSRNA049444137:12-32	CTAGTGGTCAGGACATTGGAC	21	GlnCTG	D;	0	0.01	2	1.1	6.78136	0.159696
ENSRNA049444137:1-26	GGTTCCATGGTCTAGTGGTCAGGACA	26	GlnCTG	Others;	0	0.01	1	0.55	5.78136	0.370857
ENSRNA049444137:21-47	AGGACATTGGACTCTGAATCCAGTAAC	27	GlnCTG	Others;	1	0.49	1	0.55	0.16665	0.793178
ENSRNA049444137:50-72	GAGTTCAAATCTCGGTGGAACCT	23	GlnCTG	3e;	0	0.01	1	0.55	5.78136	0.370857
ENSRNA049444175:53-68	TTCGATCCTGCGTGAG	16	ThrTGT	V;3e;	1	0.49	0	0.01	-5.61471	0.648401
ENSRNA049444183:1-19	GCCCTTATAGCTCAGTGGT	19	ThrTGT	5e;	2	0.98	4	2.2	1.16665	0.257921
ENSRNA049444183:28-47	AGTCTTGTAAACTGAAGGTC	20	ThrTGT	A;	1	0.49	0	0.01	-5.61471	0.648401
ENSRNA049444183:32-51	TTGTAAACTGAAGGTCCGCA	20	ThrTGT	A;	1	0.49	0	0.01	-5.61471	0.648401
ENSRNA049444183:34-55	GTAAACTGAAGGTCCGCAGTTC	22	ThrTGT	A;	1	0.49	0	0.01	-5.61471	0.648401
ENSRNA049444183:43-59	AGGTCCGCAGTTCGATC	17	ThrTGT	V;	0	0.01	1	0.55	5.78136	0.370857
ENSRNA049444183:52-69	GTTCGATCCTGCGTGAGG	18	ThrTGT	3e;	1	0.49	0	0.01	-5.61471	0.648401
ENSRNA049444226:1-21	GGTTTCGTGGTGTAGTTGGTT	21	ValAAC	5e;	73	35.66	57	31.3	-0.188144	0.844553
ENSRNA049444226:30-53	AGTCTAACACACTGAAGGTCTCCA	24	ValAAC	A;	0	0.01	1	0.55	5.78136	0.370857
ENSRNA049444226:32-51	TCTAACACACTGAAGGTCTC	20	ValAAC	A;	1	0.49	0	0.01	-5.61471	0.648401
ENSRNA049444226:55-71	TTCGAGTCCGGGCGAAG	17	ValAAC	3e;	4	1.95	7	3.84	0.977632	0.17512
ENSRNA049444245:1-21	GGTTTCGTGGTGTAGTTGGTT	21	ValAAC	5e;	75	36.64	66	36.25	-0.0154385	0.363989
ENSRNA049444245:15-38	GTTGGTTATCACGTCAGTCTAACA	24	ValAAC	D;	1	0.49	0	0.01	-5.61471	0.648401
ENSRNA049444245:36-54	ACACACTGAAGGTCTCCGG	19	ValAAC	A;	1	0.49	0	0.01	-5.61471	0.648401
ENSRNA049444245:56-71	TCGAGTCCGGGCGAAG	16	ValAAC	3e;	2	0.98	1	0.55	-0.83335	0.846126
ENSRNA049444333:1-21	TCCATTGTCGTCCAGCGGTTA	21	GluTTC	5e;	46	22.47	37	20.32	-0.1451	0.766368
ENSRNA049444333:13-35	CAGCGGTTAGGATATCTGGCTTT	23	GluTTC	D;	1	0.49	1	0.55	0.16665	0.793178
ENSRNA049444333:21-41	AGGATATCTGGCTTTCACCCA	21	GluTTC	Others;	0	0.01	1	0.55	5.78136	0.370857
ENSRNA049444333:30-51	GGCTTTCACCCAGGAGACCCGG	22	GluTTC	A;	2	0.98	0	0.01	-6.61471	0.36919
ENSRNA049444333:53-67	TTCGATTCCCGGCAA	15	GluTTC	V;3e;	0	0.01	1	0.55	5.78136	0.370857
ENSRNA049444342:1-23	GGTGTCGTAGTGTAGTTGGTTAT	23	ValAAC	5e;	766	374.2	823	451.99	0.272481	2.7e-12
ENSRNA049444342:16-36	TTGGTTATCACGTCAGTCTAA	21	ValAAC	D;	0	0.01	1	0.55	5.78136	0.370857
ENSRNA049444342:38-56	ACACTGAAGGTCTCCGGTT	19	ValAAC	A;	4	1.95	5	2.75	0.495957	0.443816
ENSRNA049444342:55-73	TTCGAGTCCGGGCGACGCC	19	ValAAC	3e;	1	0.49	0	0.01	-5.61471	0.648401
ENSRNA049444386:1-21	GGTTTCGTGGTGTAGTTGGTT	21	ValAAC	5e;	83	40.55	86	47.23	0.220002	0.040252
ENSRNA049444386:36-56	ACACACTGAAGGTCTCCGGTT	21	ValAAC	A;	1	0.49	1	0.55	0.16665	0.793178
ENSRNA049444386:53-72	GGTTCAAGTCCGGGCGAAGC	20	ValAAC	3e;	0	0.01	1	0.55	5.78136	0.370857
ENSRNA049444401:1-23	CCGACCTTAGCTCAGTTGGTAGA	23	TyrGTA	5e;	8	3.91	4	2.2	-0.829665	0.546169
ENSRNA049444401:15-36	GTTGGTAGAGCGGAAGACTGTA	22	TyrGTA	D;	1	0.49	1	0.55	0.16665	0.793178
ENSRNA049444401:20-43	TAGAGCGGAAGACTGTAGTTGGTG	24	TyrGTA	Others;	1	0.49	1	0.55	0.16665	0.793178
ENSRNA049444401:41-64	GTGAAAAGCCTGACAGATAATCTT	24	TyrGTA	V;	0	0.01	1	0.55	5.78136	0.370857
ENSRNA049444401:79-93	GAATCCGGCAGGTCG	15	TyrGTA	Others;	1	0.49	0	0.01	-5.61471	0.648401
ENSRNA049444442:1-22	CCGACCTTAGCTCAGTTGGTAG	22	TyrGTA	5e;	4	1.95	7	3.84	0.977632	0.17512
ENSRNA049444442:12-30	TCAGTTGGTAGAGCGGAGG	19	TyrGTA	D;	1	0.49	0	0.01	-5.61471	0.648401
ENSRNA049444442:18-36	GGTAGAGCGGAGGACTGTA	19	TyrGTA	Others;	2	0.98	1	0.55	-0.83335	0.846126
ENSRNA049444442:34-57	GTAGTATGTGTGCTGAAATCCTTA	24	TyrGTA	A;	1	0.49	0	0.01	-5.61471	0.648401
ENSRNA049444442:50-73	AATCCTTAGGTCGCTGGTTCGAAT	24	TyrGTA	3e;	0	0.01	1	0.55	5.78136	0.370857
ENSRNA049444506:1-22	GCTGGAGTAGCTCAGTTGGTTA	22	AsnGTT	5e;	14	6.84	18	9.89	0.531974	0.132934
ENSRNA049444506:14-35	AGTTGGTTAGAGCGTGTGGCTG	22	AsnGTT	D;	1	0.49	0	0.01	-5.61471	0.648401
ENSRNA049444506:29-52	GTGGCTGTTAACCACAAGGTCGAA	24	AsnGTT	A;	0	0.01	1	0.55	5.78136	0.370857
ENSRNA049444506:39-59	ACCACAAGGTCGAAGGTTCAA	21	AsnGTT	A;	1	0.49	4	2.2	2.16665	0.113916
ENSRNA049444565:15-31	GTTGGTAGAGCGCAAGG	17	LysCTT	D;	0	0.01	2	1.1	6.78136	0.159696
ENSRNA049444565:28-50	AAGGCTCTTAACCTTGTGGTCGT	23	LysCTT	A;	1	0.49	0	0.01	-5.61471	0.648401
ENSRNA049444566:1-22	TTCGTTGTAGTCTAGTTGGTTA	22	GluCTC	5e;	6	2.93	6	3.3	0.171565	0.608265
ENSRNA049444566:14-34	AGTTGGTTAGGATACTCGGCT	21	GluCTC	D;	13	6.35	10	5.49	-0.20995	0.938195
ENSRNA049444566:21-40	TAGGATACTCGGCTCTCACC	20	GluCTC	Others;	5	2.44	3	1.65	-0.564415	0.814345
ENSRNA049444566:41-59	CGAGAGACCCGGGTTCAAG	19	GluCTC	Others;	1	0.49	0	0.01	-5.61471	0.648401
ENSRNA049444566:55-69	TCAAGTCCCGGCAAC	15	GluCTC	3e;	0	0.01	1	0.55	5.78136	0.370857
ENSRNA049444574:21-47	AGGACATTGGACTCTGAATCCAGTAAC	27	GlnCTG	Others;	0	0.01	2	1.1	6.78136	0.159696
ENSRNA049444574:26-51	ATTGGACTCTGAATCCAGTAACCCGA	26	GlnCTG	A;	3	1.47	2	1.1	-0.418313	0.962085
ENSRNA049444610:1-28	GGGCGTTTGGTCTAGTGGTATGATTCTC	28	ProTGG	Others;	0	0.01	7	3.84	8.58496	0.00236448
ENSRNA049444610:14-34	AGTGGTATGATTCTCGCTTTG	21	ProTGG	D;	2	0.98	4	2.2	1.16665	0.257921
ENSRNA049444610:31-51	TTTGGGTGCGAGAGGTCCCGA	21	ProTGG	A;	3	1.47	3	1.65	0.16665	0.702215
ENSRNA049444610:39-56	CGAGAGGTCCCGAGTTCA	18	ProTGG	A;	1	0.49	0	0.01	-5.61471	0.648401
ENSRNA049444613:1-28	GGGCGTTTGGTCTAGTGGTATGATTCTC	28	ProTGG	Others;	0	0.01	6	3.3	8.36632	0.00549095
ENSRNA049444613:14-34	AGTGGTATGATTCTCGCTTTG	21	ProTGG	D;	4	1.95	0	0.01	-7.60733	0.119692
ENSRNA049444613:23-44	ATTCTCGCTTTGGGTGCGAGAG	22	ProTGG	Others;	0	0.01	1	0.55	5.78136	0.370857
ENSRNA049444613:31-51	TTTGGGTGCGAGAGGTCCCGA	21	ProTGG	A;	6	2.93	5	2.75	-0.091469	0.836866
ENSRNA049444613:40-58	GAGAGGTCCCGAGTTCGAT	19	ProTGG	V;	1	0.49	0	0.01	-5.61471	0.648401
ENSRNA049444613:50-70	GAGTTCGATTCTCGGAACGCC	21	ProTGG	3e;	1	0.49	0	0.01	-5.61471	0.648401
ENSRNA049444620:13-31	CAGTGGTAGAGCGCGTGGC	19	LysTTT	D;	3	1.47	3	1.65	0.16665	0.702215
ENSRNA049444620:54-70	CGATCCCCACAGACGGC	17	LysTTT	3e;	2	0.98	1	0.55	-0.83335	0.846126
ENSRNA049444625:11-31	CGGAGTGGTTATCGGGCATGA	21	SerAGA	D;	0	0.01	1	0.55	5.78136	0.370857
ENSRNA049444625:1-20	GTGAGCGTGCCGGAGTGGTT	20	SerAGA	5e;	35	17.1	29	15.93	-0.10225	0.701839
ENSRNA049444625:17-36	GGTTATCGGGCATGACTAGA	20	SerAGA	D;	0	0.01	1	0.55	5.78136	0.370857
ENSRNA049444625:29-51	TGACTAGAAATCATGTGGGCTCT	23	SerAGA	A;	0	0.01	1	0.55	5.78136	0.370857
ENSRNA049444625:38-63	ATCATGTGGGCTCTGCCCGCGCAGGT	26	SerAGA	A;	0	0.01	1	0.55	5.78136	0.370857
ENSRNA049444625:49-69	TCTGCCCGCGCAGGTTCGAAT	21	SerAGA	V;	0	0.01	1	0.55	5.78136	0.370857
ENSRNA049444625:52-72	GCCCGCGCAGGTTCGAATCCT	21	SerAGA	V;	1	0.49	0	0.01	-5.61471	0.648401
ENSRNA049444625:63-81	TTCGAATCCTGCCGCTCAC	19	SerAGA	3e;	0	0.01	1	0.55	5.78136	0.370857
ENSRNA049444627:1-19	GCGTCTGTAGCTCAGTGGA	19	ArgCCT	5e;	45	21.98	31	17.03	-0.368113	0.706568
ENSRNA049444627:39-54	GCAGAAGGTCGTAGGT	16	ArgCCT	A;	43	21.01	18	9.89	-1.08703	0.0328005
ENSRNA049444629:14-34	AGTTGGTTAGGATACTCGGCT	21	GluCTC	D;	9	4.4	14	7.69	0.80548	0.0872547
ENSRNA049444629:22-41	AGGATACTCGGCTCTCACCC	20	GluCTC	Others;	2	0.98	2	1.1	0.16665	0.743124
ENSRNA049444638:1-20	GCACCAGTGGTCTAGTGGTA	20	GlyGCC	5e;	29	14.17	25	13.73	-0.0455081	0.617917
ENSRNA049444638:23-44	ATAGTAACCTGCCACGGTACAG	22	GlyGCC	Others;	1	0.49	0	0.01	-5.61471	0.648401
ENSRNA049444638:28-49	AACCTGCCACGGTACAGACCCG	22	GlyGCC	A;	1	0.49	0	0.01	-5.61471	0.648401
ENSRNA049444638:36-54	ACGGTACAGACCCGGGTTC	19	GlyGCC	A;	2	0.98	1	0.55	-0.83335	0.846126
ENSRNA049444638:52-69	TTCGATTCCCGGCTGGTG	18	GlyGCC	3e;	1	0.49	0	0.01	-5.61471	0.648401
ENSRNA049444660:1-20	GTTGCTGTGGTGTAGTGGTT	20	ValTAC	5e;	16	7.82	19	10.43	0.415499	0.179619
ENSRNA049444783:1-18	GTTGAGATGGCCGAGTTG	18	LeuAAG	5e;	102	49.83	71	38.99	-0.35391	0.601747
ENSRNA049444783:14-33	AGTTGGTCTAAGGCGCCAGA	20	LeuAAG	D;	0	0.01	1	0.55	5.78136	0.370857
ENSRNA049444783:19-38	GTCTAAGGCGCCAGATTAAG	20	LeuAAG	D;	0	0.01	1	0.55	5.78136	0.370857
ENSRNA049444783:31-54	AGATTAAGGTTCTGGTCCGAAAGG	24	LeuAAG	A;	1	0.49	0	0.01	-5.61471	0.648401
ENSRNA049444783:48-65	CGAAAGGGTGTGGGTTCA	18	LeuAAG	A;V;	0	0.01	1	0.55	5.78136	0.370857
ENSRNA049444795:11-32	TCTAGTGGTTAGGACATTGGAC	22	GlnCTG	D;	2	0.98	2	1.1	0.16665	0.743124
ENSRNA049444795:1-26	GGTTCTATGGTCTAGTGGTTAGGACA	26	GlnCTG	Others;	4	1.95	2	1.1	-0.825971	0.71031
ENSRNA049444795:20-45	TAGGACATTGGACTCTGAATCCAATA	26	GlnCTG	Others;	1	0.49	0	0.01	-5.61471	0.648401
ENSRNA049444795:26-52	ATTGGACTCTGAATCCAATAGCCCGAG	27	GlnCTG	A;	1	0.49	1	0.55	0.16665	0.793178
ENSRNA049444804:1-25	GTCGTTGTAGTATAGTGGTAAGTAT	25	AspGTC	5e;	110	53.74	139	76.34	0.506443	5.27e-05
ENSRNA049444804:15-35	GTGGTAAGTATTCCCGCCTGT	21	AspGTC	D;	0	0.01	1	0.55	5.78136	0.370857
ENSRNA049444804:22-40	GTATTCCCGCCTGTCACGC	19	AspGTC	Others;	1	0.49	0	0.01	-5.61471	0.648401
ENSRNA049444804:34-55	GTCACGCGGGTGACCCGGGTTC	22	AspGTC	A;	0	0.01	4	2.2	7.78136	0.0296122
ENSRNA049444804:55-70	CGATCCCCGGCAACGG	16	AspGTC	3e;	18	8.79	30	16.48	0.906781	0.00695525
ENSRNA049444814:1-21	GGTCCCGTAGCTCAGTTGGTT	21	IleTAT	5e;	43	21.01	24	13.18	-0.672726	0.240477
ENSRNA049444827:12-32	CTAGTGGTCAGGACATTGGAC	21	GlnCTG	D;	1	0.49	1	0.55	0.16665	0.793178
ENSRNA049444827:1-26	GGTCCTATGGTCTAGTGGTCAGGACA	26	GlnCTG	Others;	5	2.44	1	0.55	-2.14938	0.244231
ENSRNA049444827:20-44	CAGGACATTGGACTCTGAATCCAGT	25	GlnCTG	Others;	1	0.49	1	0.55	0.16665	0.793178
ENSRNA049444827:26-52	ATTGGACTCTGAATCCAGTAACCCGAG	27	GlnCTG	A;	1	0.49	1	0.55	0.16665	0.793178
ENSRNA049444827:51-70	AGTTCAAATCTCGGTAGGAC	20	GlnCTG	3e;	1	0.49	0	0.01	-5.61471	0.648401
ENSRNA049444844:11-32	CTCAGTTGGTAGAGCGGAAGAC	22	TyrGTA	D;	2	0.98	0	0.01	-6.61471	0.36919
ENSRNA049444844:1-23	CCGACCTTAGCTCAGTTGGTAGA	23	TyrGTA	5e;	4	1.95	8	4.39	1.17075	0.105075
ENSRNA049444844:21-44	AGAGCGGAAGACTGTAGTAGTACT	24	TyrGTA	Others;	0	0.01	2	1.1	6.78136	0.159696
ENSRNA049444844:33-56	TGTAGTAGTACTGCTGAAATCTTT	24	TyrGTA	A;	1	0.49	0	0.01	-5.61471	0.648401
ENSRNA049444844:53-70	CTTTAGGTCGCTGGTTCG	18	TyrGTA	3e;	1	0.49	1	0.55	0.16665	0.793178
ENSRNA049444844:66-81	GTTCGAATCCGGCAGG	16	TyrGTA	Others;	1	0.49	0	0.01	-5.61471	0.648401
ENSRNA049444852:1-21	CCGACCTTAGCTCAGTTGGTA	21	TyrGTA	5e;	15	7.33	9	4.94	-0.569302	0.615234
ENSRNA049444852:19-37	GTAGAGCGGAAGACTGTAG	19	TyrGTA	Others;	0	0.01	2	1.1	6.78136	0.159696
ENSRNA049444855:1-21	CCGACCTTAGCTCAGTTGGTA	21	TyrGTA	5e;	8	3.91	7	3.84	-0.0260623	0.750984
ENSRNA049444862:1-20	GCACCAGTGGTCTAGTGGTA	20	GlyGCC	5e;	29	14.17	29	15.93	0.168907	0.282076
ENSRNA049444862:16-40	TGGTAGAATAGTACCCTGCCACGGT	25	GlyGCC	Others;	1	0.49	4	2.2	2.16665	0.113916
ENSRNA049444862:27-50	TACCCTGCCACGGTACAGACCCGG	24	GlyGCC	A;	1	0.49	2	1.1	1.16665	0.432483
ENSRNA049444862:36-56	ACGGTACAGACCCGGGTTCGA	21	GlyGCC	A;	2	0.98	0	0.01	-6.61471	0.36919
ENSRNA049444862:51-71	GTTCGATTCCCGGCTGGTGCA	21	GlyGCC	3e;	1	0.49	0	0.01	-5.61471	0.648401
ENSRNA049444874:1-20	GCACCAGTGGTCTAGTGGTA	20	GlyGCC	5e;	23	11.24	27	14.83	0.399877	0.118617
ENSRNA049444874:27-49	TACCCTGCCACGGTACAGACCCG	23	GlyGCC	A;	1	0.49	2	1.1	1.16665	0.432483
ENSRNA049444874:33-54	GCCACGGTACAGACCCGGGTTC	22	GlyGCC	A;	0	0.01	2	1.1	6.78136	0.159696
ENSRNA049444874:50-71	GGTTCGATTCCCGGCTGGTGCA	22	GlyGCC	3e;	1	0.49	0	0.01	-5.61471	0.648401
ENSRNA049444908:1-28	GGGCATTTGGTCTAGTGGTATGATTCTC	28	ProAGG	Others;	1	0.49	14	7.69	3.97213	6.19e-05
ENSRNA049444908:39-55	CGAGAGGTCCCGAGTTC	17	ProAGG	A;	0	0.01	1	0.55	5.78136	0.370857
ENSRNA049444908:50-72	GAGTTCAATTCTCTGAATGCCCC	23	ProAGG	3e;	0	0.01	1	0.55	5.78136	0.370857
ENSRNA049444921:1-28	GGGCATTTGGTCTAGTGGTATGATTCTC	28	ProAGG	Others;	0	0.01	9	4.94	8.94837	0.000438442
ENSRNA049444921:37-56	TGCGAGAGGTCCCGAGTTCA	20	ProAGG	A;	1	0.49	0	0.01	-5.61471	0.648401
ENSRNA049444921:53-67	TTCAATTCTCGGAAT	15	ProAGG	V;3e;	1	0.49	0	0.01	-5.61471	0.648401
ENSRNA049444921:55-71	CAATTCTCGGAATGCCC	17	ProAGG	3e;	1	0.49	0	0.01	-5.61471	0.648401
ENSRNA049444943:1-28	GGGCATTTGGTCTAGTGGTATGATTCTC	28	ProAGG	Others;	2	0.98	14	7.69	2.97213	0.000314485
ENSRNA049444992:11-32	CTCAGTTGGTTAGAGCGTCGTG	22	IleAAT	D;	1	0.49	0	0.01	-5.61471	0.648401
ENSRNA049444992:1-21	GGCCCATTAGCTCAGTTGGTT	21	IleAAT	5e;	11	5.37	10	5.49	0.0318841	0.653633
ENSRNA049444992:14-37	AGTTGGTTAGAGCGTCGTGCTAAT	24	IleAAT	D;	0	0.01	1	0.55	5.78136	0.370857
ENSRNA049444992:52-68	AGGTTCGAGACCTGCAT	17	IleAAT	V;3e;	0	0.01	1	0.55	5.78136	0.370857
ENSRNA049444992:54-70	GTTCGAGACCTGCATGG	17	IleAAT	V;3e;	0	0.01	1	0.55	5.78136	0.370857
ENSRNA049445077:1-23	GGTGTCGTGGTGTAGTTGGTTAT	23	ValAAC	5e;	1149	561.3	952	522.83	-0.10243	0.0372905
ENSRNA049445077:20-39	TTATCACGTCAGTCTAACAC	20	ValAAC	Others;	0	0.01	1	0.55	5.78136	0.370857
ENSRNA049445077:34-57	TAACACACTGAAGGTCTCCGGTTT	24	ValAAC	A;	2	0.98	1	0.55	-0.83335	0.846126
ENSRNA049445161:1-19	GCGCCCATGGCCTAATGGA	19	ArgTCT	5e;	13	6.35	13	7.14	0.169167	0.464573
ENSRNA049445161:12-29	CTAATGGATAAGGCGCTT	18	ArgTCT	D;	1	0.49	1	0.55	0.16665	0.793178
ENSRNA049445161:31-55	ACTTCTAATCAAGCGATTGTGGGTT	25	ArgTCT	A;	3	1.47	6	3.3	1.16665	0.162364
ENSRNA049445175:1-21	GTCGCTTTGGCCGAGTGGTTA	21	SerGCT	5e;	7	3.42	2	1.1	-1.63649	0.245698
ENSRNA049445175:37-56	AAGTACATGGGGTTTCCCCG	20	SerGCT	A;	1	0.49	0	0.01	-5.61471	0.648401
ENSRNA049445175:44-66	TGGGGTTTCCCCGCGAGAGTTCG	23	SerGCT	A;V;	0	0.01	1	0.55	5.78136	0.370857
ENSRNA049445175:61-82	AGTTCGAATCTCTCAGGCGACG	22	SerGCT	3e;	2	0.98	2	1.1	0.16665	0.743124
ENSRNA049445241:1-28	GGGCATTTGGTCTAGTGGTATGATTCTC	28	ProCGG	Others;	1	0.49	10	5.49	3.48595	0.0013713
ENSRNA049445241:32-48	TCGGGTGCGAGAGGTCC	17	ProCGG	A;	2	0.98	1	0.55	-0.83335	0.846126
ENSRNA049445264:1-19	GCGCCTGTAGCTCAGTGGA	19	ArgCCT	5e;	152	74.25	106	58.21	-0.351124	0.529212
ENSRNA049445264:27-41	TCTGTTTCCTAAGCA	15	ArgCCT	Others;	1	0.49	0	0.01	-5.61471	0.648401
ENSRNA049445264:38-57	AGCAGAAAGTCGTAGGTTCG	20	ArgCCT	A;	7	3.42	11	6.04	0.820552	0.125556
ENSRNA049445264:48-72	CGTAGGTTCGACCCCTACCTGGCGC	25	ArgCCT	3e;	1	0.49	0	0.01	-5.61471	0.648401
ENSRNA049445274:1-23	CCGACCTTAGCTCAGTTGGTAGA	23	TyrGTA	5e;	6	2.93	8	4.39	0.58332	0.287685
ENSRNA049445274:13-33	CAGTTGGTAGAGCGGAGGACT	21	TyrGTA	D;	2	0.98	0	0.01	-6.61471	0.36919
ENSRNA049445274:22-44	GAGCGGAGGACTGTAGTTGTTGC	23	TyrGTA	Others;	0	0.01	1	0.55	5.78136	0.370857
ENSRNA049445274:27-46	GAGGACTGTAGTTGTTGCTG	20	TyrGTA	A;	1	0.49	0	0.01	-5.61471	0.648401
ENSRNA049445274:38-59	TTGTTGCTGGAATCCTTAGGTC	22	TyrGTA	Others;	0	0.01	1	0.55	5.78136	0.370857
ENSRNA049445274:64-79	GTTCGAATCCGGCAGG	16	TyrGTA	Others;	0	0.01	1	0.55	5.78136	0.370857
ENSRNA049445284:1-21	GCTCTCGTAGCTCAGTTGGTT	21	ThrAGT	5e;	9	4.4	7	3.84	-0.196397	0.92113
ENSRNA049445284:38-61	AAGCGGGAGGTCTTGAGTTCGACT	24	ThrAGT	Others;	1	0.49	1	0.55	0.16665	0.793178
ENSRNA049445349:1-20	GCTTTCATAGCTCAGTTGGT	20	ThrAGT	5e;	2	0.98	3	1.65	0.751612	0.448333
ENSRNA049445395:11-34	TGTAGTTGGTTATCACGTCAGTCT	24	ValAAC	D;	0	0.01	1	0.55	5.78136	0.370857
ENSRNA049445395:1-21	GGTTTCGTGGTGTAGTTGGTT	21	ValAAC	5e;	70	34.2	61	33.5	-0.0298352	0.412144
ENSRNA049445395:18-40	GGTTATCACGTCAGTCTAACACA	23	ValAAC	Others;	0	0.01	1	0.55	5.78136	0.370857
ENSRNA049445395:35-56	AACACACTGAAGGTCTCCGGTT	22	ValAAC	A;	2	0.98	3	1.65	0.751612	0.448333
ENSRNA049445395:58-72	GAGTCCGGGCGAAGC	15	ValAAC	3e;	1	0.49	0	0.01	-5.61471	0.648401
ENSRNA049445412:1-21	GGTTTCGTGGTGTAGTTGGTT	21	ValAAC	5e;	84	41.03	83	45.58	0.151722	0.0831147
ENSRNA049445412:19-42	GTTATCACGTCAGTCTAACACACT	24	ValAAC	Others;	0	0.01	1	0.55	5.78136	0.370857
ENSRNA049445412:36-58	ACACACTGAAGGTCTCCGGTTCG	23	ValAAC	A;	2	0.98	1	0.55	-0.83335	0.846126
ENSRNA049445440:39-55	GCGGGAGATTGTGGGTT	17	ArgCCG	A;	16	7.82	9	4.94	-0.662658	0.505918
ENSRNA049445450:34-55	TTAACCGATTGGTCGTAGGTTC	22	AsnGTT	A;	4	1.95	3	1.65	-0.241008	0.95519
ENSRNA049445450:55-72	CGAATCCTACTTGGGGAG	18	AsnGTT	3e;	1	0.49	0	0.01	-5.61471	0.648401
ENSRNA049445487:1-20	GCACCAGTGGTCTAGTGGTA	20	GlyGCC	5e;	34	16.61	14	7.69	-1.111	0.053374
ENSRNA049445487:19-41	TAGAATAGTACCCTGCCACGGTA	23	GlyGCC	Others;	1	0.49	7	3.84	2.97025	0.0131349
ENSRNA049445487:27-50	TACCCTGCCACGGTACAGACCCGG	24	GlyGCC	A;	1	0.49	2	1.1	1.16665	0.432483
ENSRNA049445487:40-61	TACAGACCCGGGTTCGATTCCC	22	GlyGCC	V;	0	0.01	1	0.55	5.78136	0.370857
ENSRNA049445487:50-69	GGTTCGATTCCCGGCTGGTG	20	GlyGCC	3e;	0	0.01	1	0.55	5.78136	0.370857
ENSRNA049445534:1-21	GGATCCGTGGCGCAATGGTAG	21	TrpCCA	5e;	1	0.49	0	0.01	-5.61471	0.648401
ENSRNA049445534:19-39	TAGCGCGTTTGACTCCAAATC	21	TrpCCA	Others;	0	0.01	2	1.1	6.78136	0.159696
ENSRNA049445534:37-56	ATCAGAAGGTTGCGTGTTCG	20	TrpCCA	A;	3	1.47	2	1.1	-0.418313	0.962085
ENSRNA049445534:50-63	GTGTTCGATTCACG	14	TrpCCA	V;3e;	0	0.01	2	1.1	6.78136	0.159696
ENSRNA049445534:56-72	GATTCACGTCGGGTTCA	17	TrpCCA	3e;	1	0.49	2	1.1	1.16665	0.432483
ENSRNA049445550:1-21	GGTTTCGTGGTGTAGTTGGTT	21	ValAAC	5e;	70	34.2	60	32.95	-0.0537179	0.469469
ENSRNA049445550:39-59	CACTAAAGGTCTCCGGTTTGA	21	ValAAC	A;	1	0.49	1	0.55	0.16665	0.793178
ENSRNA049445714:1-19	GTCAGGATGGCCGAGTGGT	19	LeuCAA	5e;	97	47.39	65	35.7	-0.408659	0.45926
ENSRNA049445714:23-42	AGGCGCCAGACTCAAGTTCT	20	LeuCAA	Others;	1	0.49	0	0.01	-5.61471	0.648401
ENSRNA049445714:30-51	AGACTCAAGTTCTGGTTCTCGT	22	LeuCAA	A;	0	0.01	5	2.75	8.10329	0.0127514
ENSRNA049445714:49-66	CGTAAGAGAGCGTGGGTT	18	LeuCAA	A;V;	1	0.49	2	1.1	1.16665	0.432483
ENSRNA049445714:64-82	GTTCAAATCCCACTTCTGA	19	LeuCAA	3e;	0	0.01	1	0.55	5.78136	0.370857
ENSRNA049445814:1-21	GTCTGGGTGGTGTAGTCGGTT	21	ValCAC	5e;	706	344.89	552	303.15	-0.186104	0.55498
ENSRNA049445814:30-52	AGTCTCACACACTAGAGGTCCCC	23	ValCAC	A;	0	0.01	2	1.1	6.78136	0.159696
ENSRNA049445814:38-56	ACACTAGAGGTCCCCGGTT	19	ValCAC	A;	2	0.98	0	0.01	-6.61471	0.36919
ENSRNA049445846:10-31	GTCCAGTGGTTAGGACATCGTC	22	GluTTC	D;	0	0.01	1	0.55	5.78136	0.370857
ENSRNA049445846:1-20	GTCCCTTTCGTCCAGTGGTT	20	GluTTC	5e;	4	1.95	1	0.55	-1.82597	0.377396
ENSRNA049445846:26-42	ATCGTCTTTTCATGTCG	17	GluTTC	Others;	1	0.49	0	0.01	-5.61471	0.648401
ENSRNA049445885:1-21	GTCTGGGTGGTGTAGTCGGTT	21	ValCAC	5e;	708	345.87	550	302.06	-0.195395	0.633617
ENSRNA049445885:55-71	GTTCGAACCCGGGCTCA	17	ValCAC	V;3e;	1	0.49	0	0.01	-5.61471	0.648401
ENSRNA049445922:1-23	GGGGATGTAGCTCAAATGGTAGA	23	AlaTGC	5e;	5180	2530.49	4402	2417.55	-0.065871	1.35e-08
ENSRNA049445951:1-20	TCCTCAGTAGCTCAGTGGTA	20	AsnGTT	5e;	160	78.16	81	44.48	-0.813274	0.00288148
ENSRNA049445951:30-50	GCTGTTAACCGATTGGTCGTA	21	AsnGTT	A;	1	0.49	0	0.01	-5.61471	0.648401
ENSRNA049445951:53-72	TTCGAATCCTACTTGGGGAG	20	AsnGTT	3e;	1	0.49	0	0.01	-5.61471	0.648401
ENSRNA049445959:42-64	TGTGGGCTCTGCCCGCGCAGGTT	23	SerAGA	A;V;	0	0.01	1	0.55	5.78136	0.370857
ENSRNA049445959:6-25	CGTGCCGGAGTGGTTATCGG	20	SerAGA	Others;	0	0.01	1	0.55	5.78136	0.370857
ENSRNA049445959:63-81	TTCGAATCCTGCCGTCCAC	19	SerAGA	3e;	1	0.49	0	0.01	-5.61471	0.648401
ENSRNA049446002:1-21	CCGACCTTAGCTCAGTTGGTA	21	TyrGTA	5e;	11	5.37	6	3.3	-0.702456	0.557826
ENSRNA049446002:14-30	AGTTGGTAGAGCGGAAG	17	TyrGTA	D;	2	0.98	0	0.01	-6.61471	0.36919
ENSRNA049446002:19-36	GTAGAGCGGAAGACTGTA	18	TyrGTA	Others;	2	0.98	0	0.01	-6.61471	0.36919
ENSRNA049446002:29-51	AGACTGTAGTGGTTGCTGTAATC	23	TyrGTA	A;	1	0.49	1	0.55	0.16665	0.793178
ENSRNA049446002:65-79	TTCGAATCCGGCAGG	15	TyrGTA	Others;	1	0.49	0	0.01	-5.61471	0.648401
ENSRNA049446054:1-19	GTCAGGATGGCCGAGTGGT	19	LeuCAA	5e;	61	29.8	36	19.77	-0.591999	0.244048
ENSRNA049446054:30-52	AGACTCAAGTTCTGGTCTTCGTA	23	LeuCAA	A;	1	0.49	2	1.1	1.16665	0.432483
ENSRNA049446054:47-68	TTCGTAAGAGGGCGTGGGTTCA	22	LeuCAA	A;V;	10	4.89	19	10.43	1.09283	0.0156039
ENSRNA049446068:1-22	GTTCGCGTGGCCTAATGGATAA	22	ArgCCG	5e;	2	0.98	3	1.65	0.751612	0.448333
ENSRNA049446068:20-48	TAAGGCGCTCGCCTCCGGAGCGGGAGATT	29	ArgCCG	Others;	0	0.01	1	0.55	5.78136	0.370857
ENSRNA049446068:39-55	GCGGGAGATTGTGGGTT	17	ArgCCG	A;	15	7.33	14	7.69	0.0691704	0.556692
ENSRNA049446068:54-73	TTCGAGTCCCACCGTGAACG	20	ArgCCG	3e;	1	0.49	0	0.01	-5.61471	0.648401
ENSRNA049446091:11-36	CGCAATGGTAGCGCGTCTGACTCCAG	26	TrpCCA	Others;	0	0.01	1	0.55	5.78136	0.370857
ENSRNA049446091:1-18	GGATCCGTGGCGCAATGG	18	TrpCCA	5e;	2	0.98	1	0.55	-0.83335	0.846126
ENSRNA049446091:16-34	TGGTAGCGCGTCTGACTCC	19	TrpCCA	D;	0	0.01	1	0.55	5.78136	0.370857
ENSRNA049446091:27-50	CTGACTCCAGATCAGAAGGTTGCG	24	TrpCCA	A;	3	1.47	2	1.1	-0.418313	0.962085
ENSRNA049446091:32-56	TCCAGATCAGAAGGTTGCGTGTTCG	25	TrpCCA	A;	4	1.95	3	1.65	-0.241008	0.95519
ENSRNA049446091:56-72	GATTCACGTCGGGTTCA	17	TrpCCA	3e;	1	0.49	2	1.1	1.16665	0.432483
ENSRNA049446107:1-20	GCACCAGTGGTCTAGTGGTA	20	GlyGCC	5e;	31	15.14	18	9.89	-0.614323	0.387858
ENSRNA049446107:13-28	TAGTGGTAGAATAGTA	16	GlyGCC	D;	0	0.01	1	0.55	5.78136	0.370857
ENSRNA049446107:29-50	CCCTGCCACAGTACAGACCCGG	22	GlyGCC	A;	0	0.01	3	1.65	7.36632	0.0687674
ENSRNA049446107:51-66	GTTCGATTCCCGGCTG	16	GlyGCC	V;3e;	1	0.49	0	0.01	-5.61471	0.648401
ENSRNA049446161:1-21	GACTTCATGGCCCAATGGATA	21	ArgACG	5e;	1	0.49	1	0.55	0.16665	0.793178
ENSRNA049446161:12-29	CCAATGGATAAGGCGCTG	18	ArgACG	D;	1	0.49	0	0.01	-5.61471	0.648401
ENSRNA049446161:16-35	TGGATAAGGCGCTGGTCTAC	20	ArgACG	D;	1	0.49	0	0.01	-5.61471	0.648401
ENSRNA049446190:1-20	GCTGGAATAGCTCAGTTGGT	20	AsnGTT	5e;	49	23.94	36	19.77	-0.27611	0.91168
ENSRNA049446190:13-35	CAGTTGGTTAGAGCGTGTGGCTG	23	AsnGTT	D;	1	0.49	0	0.01	-5.61471	0.648401
ENSRNA049446190:39-61	ACCACAAGGTCGAAGGTTCAACC	23	AsnGTT	Others;	1	0.49	0	0.01	-5.61471	0.648401
ENSRNA049446218:1-23	CCGACCTTAGCTCAGTTGGTAGA	23	TyrGTA	5e;	5	2.44	9	4.94	1.01763	0.114038
ENSRNA049446218:15-34	GTTGGTAGAGCGGAGGACTG	20	TyrGTA	D;	2	0.98	1	0.55	-0.83335	0.846126
ENSRNA049446218:20-43	TAGAGCGGAGGACTGTAGTGTGCT	24	TyrGTA	Others;	1	0.49	0	0.01	-5.61471	0.648401
ENSRNA049446218:27-50	GAGGACTGTAGTGTGCTTCATAGC	24	TyrGTA	A;	0	0.01	1	0.55	5.78136	0.370857
ENSRNA049446218:54-71	CCTTAGGTCGCTGGTTCG	18	TyrGTA	3e;	1	0.49	0	0.01	-5.61471	0.648401
ENSRNA049446218:71-85	GAATCCGGCAGGTCG	15	TyrGTA	Others;	1	0.49	0	0.01	-5.61471	0.648401
ENSRNA049446234:1-21	GTCTGGGTGGTGTAGTCGGTT	21	ValCAC	5e;	661	322.91	552	303.15	-0.0911003	0.0852362
ENSRNA049446234:40-56	ACTAGAGGTCCCCGGTT	17	ValCAC	A;	1	0.49	0	0.01	-5.61471	0.648401
ENSRNA049446294:19-39	TTAGGATATCTGGCTTTCACC	21	GluTTC	Others;	1	0.49	0	0.01	-5.61471	0.648401
ENSRNA049446294:30-51	GGCTTTCACCCAGGAGACCCGG	22	GluTTC	A;	1	0.49	4	2.2	2.16665	0.113916
ENSRNA049446362:1-21	TCCGTTGTAGTCTAGTCGTTA	21	GluCTC	5e;	1	0.49	0	0.01	-5.61471	0.648401
ENSRNA049446362:19-42	TTAGGATACTCGGTTCTCACCCGA	24	GluCTC	Others;	0	0.01	1	0.55	5.78136	0.370857
ENSRNA049446394:1-22	GTTTGGGTGGTGTAGTCGGTTA	22	ValCAC	5e;	216	105.52	127	69.75	-0.597251	0.0238761
ENSRNA049446394:24-46	CACGCTAGTCTCACACACTAGAG	23	ValCAC	Others;	1	0.49	0	0.01	-5.61471	0.648401
ENSRNA049446394:33-55	CTCACACACTAGAGGTCCCCGGT	23	ValCAC	A;	0	0.01	1	0.55	5.78136	0.370857
ENSRNA049446394:54-74	GTTCGAACCCGGGCTCAGACA	21	ValCAC	3e;	1	0.49	1	0.55	0.16665	0.793178
ENSRNA049446407:1-21	TGTCCCGTAGCTCAGTTGGTT	21	IleTAT	5e;	27	13.19	15	8.24	-0.678728	0.353563
ENSRNA049446407:16-33	TTGGTTAGAGCGTTGGTC	18	IleTAT	D;	0	0.01	1	0.55	5.78136	0.370857
ENSRNA049446407:23-46	GAGCGTTGGTCTTATGAGCCGAAG	24	IleTAT	Others;	1	0.49	0	0.01	-5.61471	0.648401
ENSRNA049446407:28-54	TTGGTCTTATGAGCCGAAGGTCGCGGG	27	IleTAT	A;	0	0.01	1	0.55	5.78136	0.370857
ENSRNA049446407:36-58	ATGAGCCGAAGGTCGCGGGTTCG	23	IleTAT	A;	0	0.01	1	0.55	5.78136	0.370857
ENSRNA049446500:1-23	GTCGCTTTGGCCGAGTGGTTAAG	23	SerGCT	5e;	2	0.98	3	1.65	0.751612	0.448333
ENSRNA049446500:36-53	TAAGTACATGGGGTCTCC	18	SerGCT	A;	0	0.01	1	0.55	5.78136	0.370857
ENSRNA049446500:61-77	AGTTCGAATCTCTCAGG	17	SerGCT	V;3e;	4	1.95	5	2.75	0.495957	0.443816
ENSRNA049446534:15-38	GTGGATATAGCGTTAGACTCCGAA	24	ArgCCG	Others;	1	0.49	0	0.01	-5.61471	0.648401
ENSRNA049446544:1-19	GATCACATAGCGGAGTGGA	19	ArgCCG	5e;	129	63.02	62	34.05	-0.888155	0.00290145
ENSRNA049446544:35-54	CGAATCTAAAGGTCGTGGGT	20	ArgCCG	A;	1	0.49	0	0.01	-5.61471	0.648401
ENSRNA049446544:43-60	AAGGTCGTGGGTTCGAAT	18	ArgCCG	V;	1	0.49	1	0.55	0.16665	0.793178
ENSRNA049446633:1-26	GGTCCTATGGTCTAGCGGTTAGGACA	26	GlnCTG	Others;	34	16.61	20	10.98	-0.597174	0.387012
ENSRNA049446633:21-45	AGGACATTGGACTCTGAATCCAGTA	25	GlnCTG	Others;	0	0.01	5	2.75	8.10329	0.0127514
ENSRNA049446633:28-51	TGGACTCTGAATCCAGTAACCCGA	24	GlnCTG	A;	3	1.47	0	0.01	-7.19967	0.210212
ENSRNA049446633:51-71	AGTTCAATTCTCGGTAGGACC	21	GlnCTG	3e;	0	0.01	1	0.55	5.78136	0.370857
ENSRNA049446713:1-20	GCCGTCTTAGCTCAGTGGTA	20	LysTTT	5e;	15	7.33	6	3.3	-1.15135	0.19699
ENSRNA049446713:13-32	CAGTGGTAGAGCGCGTGGCT	20	LysTTT	D;	4	1.95	0	0.01	-7.60733	0.119692
ENSRNA049446713:28-49	TGGCTTTTAACCACGTGGTCGT	22	LysTTT	A;	0	0.01	1	0.55	5.78136	0.370857
ENSRNA049446713:55-70	CGATCCCCACAGACGG	16	LysTTT	3e;	2	0.98	0	0.01	-6.61471	0.36919
ENSRNA049446731:1-21	GCGCCCATGGCCTAATGGATA	21	ArgTCT	5e;	11	5.37	10	5.49	0.0318841	0.653633
ENSRNA049446731:15-38	ATGGATAAGGCGTCTGACTTCTAA	24	ArgTCT	Others;	1	0.49	0	0.01	-5.61471	0.648401
ENSRNA049446731:31-54	ACTTCTAATCAGGCGATTGTGGGT	24	ArgTCT	A;	5	2.44	8	4.39	0.84734	0.183497
ENSRNA049446752:29-50	GGCTGTTAACCGATTGGTCGTA	22	AsnGTT	A;	27	13.19	14	7.69	-0.778389	0.262794
ENSRNA049446752:37-55	ACCGATTGGTCGTAGGTTC	19	AsnGTT	A;	8	3.91	3	1.65	-1.2447	0.332054
ENSRNA049446752:42-63	TTGGTCGTAGGTTCGAATCCTA	22	AsnGTT	V;	1	0.49	0	0.01	-5.61471	0.648401
ENSRNA049446797:12-32	CTAGTGGTTAGGACATTGGAC	21	GlnCTG	D;	6	2.93	0	0.01	-8.19476	0.0388041
ENSRNA049446797:1-26	GGTTCCATGGTCTAGTGGTTAGGACA	26	GlnCTG	Others;	0	0.01	4	2.2	7.78136	0.0296122
ENSRNA049446797:21-47	AGGACATTGGACTCTGAATCCAGTAAC	27	GlnCTG	Others;	2	0.98	0	0.01	-6.61471	0.36919
ENSRNA049446797:26-45	ATTGGACTCTGAATCCAGTA	20	GlnCTG	Others;	1	0.49	1	0.55	0.16665	0.793178
ENSRNA049446813:1-21	GGCCCATTAGCTCAGTTGGTT	21	IleAAT	5e;	7	3.42	6	3.3	-0.0515303	0.79108
ENSRNA049446813:15-32	GTTGGTTAGAGCATCGTG	18	IleAAT	D;	1	0.49	2	1.1	1.16665	0.432483
ENSRNA049446813:31-52	TGCTAATAACGCGAAGGTCGCA	22	IleAAT	A;	1	0.49	0	0.01	-5.61471	0.648401
ENSRNA049446813:41-60	GCGAAGGTCGCAGGTTCGAG	20	IleAAT	V;	1	0.49	0	0.01	-5.61471	0.648401
ENSRNA049446813:55-73	TTCGAGACCTGCATGGGCC	19	IleAAT	3e;	0	0.01	1	0.55	5.78136	0.370857
ENSRNA049446837:1-21	CCGACCTTAGCTCAGTTGGTA	21	TyrGTA	5e;	10	4.89	12	6.59	0.430444	0.274825
ENSRNA049446837:16-38	TTGGTAGAGCGGAGGACTGTAGA	23	TyrGTA	Others;	4	1.95	0	0.01	-7.60733	0.119692
ENSRNA049446837:28-50	AGGACTGTAGACGGTGTACCACA	23	TyrGTA	A;	2	0.98	3	1.65	0.751612	0.448333
ENSRNA049446837:50-73	AGTTAATCCTTAGGTCGCTGGTTC	24	TyrGTA	3e;	0	0.01	1	0.55	5.78136	0.370857
ENSRNA049446837:54-77	AATCCTTAGGTCGCTGGTTCGAAT	24	TyrGTA	3e;	0	0.01	1	0.55	5.78136	0.370857
ENSRNA049446837:71-87	TTCGAATCCGGCAGGTC	17	TyrGTA	Others;	1	0.49	0	0.01	-5.61471	0.648401
ENSRNA049446861:1-20	GCCCTTATAGCTCAGTGGTA	20	ThrTGT	5e;	0	0.01	3	1.65	7.36632	0.0687674
ENSRNA049446861:12-29	TCAGTGGTAGAGCGTCAG	18	ThrTGT	D;	0	0.01	1	0.55	5.78136	0.370857
ENSRNA049446861:30-51	TCTTGTAAACTGAAGGTCCGTA	22	ThrTGT	A;	0	0.01	1	0.55	5.78136	0.370857
ENSRNA049446861:47-63	CCGTAGTTCGATCCTGC	17	ThrTGT	V;3e;	0	0.01	3	1.65	7.36632	0.0687674
ENSRNA049446954:1-20	GCTGGAATAGCTCAGTTGGT	20	AsnGTT	5e;	62	30.29	40	21.97	-0.463307	0.444516
ENSRNA049446954:29-47	ATGGCTGTTAACCATAAGG	19	AsnGTT	A;	1	0.49	0	0.01	-5.61471	0.648401
ENSRNA049447024:1-20	GTCGATATGTCCGAGTGGTT	20	SerCGA	5e;	40	19.54	37	20.32	0.0564699	0.370537
ENSRNA049447024:33-51	TCGAAATCTGTTGGGCTTT	19	SerCGA	A;	1	0.49	2	1.1	1.16665	0.432483
ENSRNA049447024:44-66	TGGGCTTTGCCTGCGCAGGTTCG	23	SerCGA	A;V;	0	0.01	1	0.55	5.78136	0.370857
ENSRNA049447024:63-81	TTCGAATCCTGCTGTCGAC	19	SerCGA	3e;	5	2.44	2	1.1	-1.14938	0.509609
ENSRNA049447069:1-20	GCCTCCGTAGCATAGTGGTA	20	ThrCGT	5e;	13	6.35	15	8.24	0.375888	0.259247
ENSRNA049447069:14-37	AGTGGTAGTGCGTTCGCTTCGTAA	24	ThrCGT	Others;	1	0.49	0	0.01	-5.61471	0.648401
ENSRNA049447098:1-21	GTCAATATGTCCGAGTGGTTA	21	SerTGA	5e;	11	5.37	10	5.49	0.0318841	0.653633
ENSRNA049447098:16-37	TGGTTAAGGAGACAGACTTGAA	22	SerTGA	Others;	2	0.98	0	0.01	-6.61471	0.36919
ENSRNA049447098:34-53	TGAAATCTGTTGGGCTTCGC	20	SerTGA	A;	9	4.4	9	4.94	0.167008	0.537964
ENSRNA049447098:63-82	TTCGAACCCTGCTGTTGACG	20	SerTGA	3e;	3	1.47	1	0.55	-1.41831	0.572292
ENSRNA049447135:1-21	GACGGTTTGGCCGAGTGGTCT	21	LeuTAG	5e;	0	0.01	1	0.55	5.78136	0.370857
ENSRNA049447135:30-50	AGATTTAGGCTCTGGTCCGAA	21	LeuTAG	A;	4	1.95	5	2.75	0.495957	0.443816
ENSRNA049447135:38-57	GCTCTGGTCCGAAAGGGCGT	20	LeuTAG	A;	1	0.49	0	0.01	-5.61471	0.648401
ENSRNA049447135:47-64	CGAAAGGGCGTGGGTTCA	18	LeuTAG	A;V;	18	8.79	12	6.59	-0.415585	0.76461
ENSRNA049447135:61-76	TTCAAATCCCACAGCC	16	LeuTAG	V;3e;	1	0.49	0	0.01	-5.61471	0.648401
ENSRNA049447158:1-21	GATTCCATGGCCCAATGGATA	21	ArgACG	5e;	1	0.49	0	0.01	-5.61471	0.648401
ENSRNA049447158:33-51	TACGAAACCAGAGATTCTG	19	ArgACG	A;	1	0.49	0	0.01	-5.61471	0.648401
ENSRNA049447162:1-21	CCGACCTTAGCTCAGTTGGTA	21	TyrGTA	5e;	8	3.91	10	5.49	0.489638	0.283198
ENSRNA049447162:12-33	TCAGTTGGTAGAGCGGAGGACT	22	TyrGTA	D;	0	0.01	2	1.1	6.78136	0.159696
ENSRNA049447162:28-48	AGGACTGTAGTTGGTGATGCC	21	TyrGTA	A;	1	0.49	0	0.01	-5.61471	0.648401
ENSRNA049447162:36-56	AGTTGGTGATGCCTTCAGCCA	21	TyrGTA	A;	1	0.49	1	0.55	0.16665	0.793178
ENSRNA049447162:39-61	TGGTGATGCCTTCAGCCATCCTT	23	TyrGTA	Others;	1	0.49	1	0.55	0.16665	0.793178
ENSRNA049447162:56-70	ATCCTTAGGTCGCTG	15	TyrGTA	3e;	1	0.49	0	0.01	-5.61471	0.648401
ENSRNA049447197:1-20	GCTCTCGTAGCTCAGTTGGT	20	ThrAGT	5e;	13	6.35	9	4.94	-0.362246	0.872981
ENSRNA049447197:39-62	AGCGGGAGGTCTTGAGTTTGACTC	24	ThrAGT	Others;	1	0.49	0	0.01	-5.61471	0.648401
ENSRNA049447211:15-39	GTTGGTTAGAGCGTGTGGCTGTTAA	25	AsnGTT	Others;	0	0.01	1	0.55	5.78136	0.370857
ENSRNA049447211:23-42	GAGCGTGTGGCTGTTAACCA	20	AsnGTT	Others;	0	0.01	1	0.55	5.78136	0.370857
ENSRNA049447211:37-58	TAACCACAAGGTCGGAGGTTCA	22	AsnGTT	A;	2	0.98	2	1.1	0.16665	0.743124
ENSRNA049447211:57-73	CAAGCCCTCCTTCTAGC	17	AsnGTT	3e;	1	0.49	0	0.01	-5.61471	0.648401
ENSRNA049447240:1-21	GTGGACGTGCCGGAGTGGTTA	21	SerAGA	5e;	1115	544.69	813	446.49	-0.286808	0.430474
ENSRNA049447240:36-53	AAATCATGTGGGCTTTGC	18	SerAGA	A;	2	0.98	0	0.01	-6.61471	0.36919
ENSRNA049447240:45-64	GGGCTTTGCCCGCGCAGGTT	20	SerAGA	A;V;	1	0.49	1	0.55	0.16665	0.793178
ENSRNA049447240:50-72	TTGCCCGCGCAGGTTCGAATCCT	23	SerAGA	V;	2	0.98	0	0.01	-6.61471	0.36919
ENSRNA049447240:61-78	GGTTCGAATCCTGCCGTC	18	SerAGA	V;3e;	0	0.01	1	0.55	5.78136	0.370857
ENSRNA049447284:1-21	GCCCGTCTAGCTCAGTTGGTA	21	LysCTT	5e;	8	3.91	16	8.79	1.16869	0.020933
ENSRNA049447284:12-30	TCAGTTGGTAGAGCGCAAG	19	LysCTT	D;	1	0.49	0	0.01	-5.61471	0.648401
ENSRNA049447284:14-32	AGTTGGTAGAGCGCAAGGC	19	LysCTT	D;	0	0.01	1	0.55	5.78136	0.370857
ENSRNA049447284:38-57	ACCTTGTGGTCGTGGGTTCG	20	LysCTT	A;	1	0.49	0	0.01	-5.61471	0.648401
ENSRNA049447284:42-60	TGTGGTCGTGGGTTCGAGC	19	LysCTT	V;	1	0.49	0	0.01	-5.61471	0.648401
ENSRNA049447302:1-21	GTGGTCGTGCCGGAGTGGTTA	21	SerAGA	5e;	90	43.97	104	57.12	0.377476	0.00314579
ENSRNA049447302:36-51	AAATCATGTGGGCTTT	16	SerAGA	A;	3	1.47	3	1.65	0.16665	0.702215
ENSRNA049447302:47-65	GCTTTGCCCGCGCAGGTTC	19	SerAGA	A;V;	0	0.01	1	0.55	5.78136	0.370857
ENSRNA049447302:52-72	GCCCGCGCAGGTTCGAATCCT	21	SerAGA	V;	0	0.01	1	0.55	5.78136	0.370857
ENSRNA049447318:1-20	ACCGTCTTAGCTCAGTGGTA	20	LysTTT	5e;	1	0.49	0	0.01	-5.61471	0.648401
ENSRNA049447318:13-32	CAGTGGTAGAGCGCGTGGCT	20	LysTTT	D;	1	0.49	3	1.65	1.75161	0.225388
ENSRNA049447318:40-58	ACGTGGTCGTGGGTTCGAT	19	LysTTT	V;	1	0.49	1	0.55	0.16665	0.793178
ENSRNA049447318:55-70	CGATCCCCACAGACGG	16	LysTTT	3e;	3	1.47	2	1.1	-0.418313	0.962085
ENSRNA049447371:1-23	GGGGATGTAGCTCAAATGGTAGA	23	AlaTGC	5e;	5161	2521.21	4427	2431.28	-0.0524002	8.39e-10
ENSRNA049447371:38-57	TGCGAGAGGCACGGGGTTCG	20	AlaTGC	A;	0	0.01	1	0.55	5.78136	0.370857
ENSRNA049447371:56-73	CGATCCCCCGCATCTCCA	18	AlaTGC	3e;	2	0.98	1	0.55	-0.83335	0.846126
ENSRNA049447392:1-22	TCCGTTGTAGTCTAGTTGGTTA	22	GluCTC	5e;	65	31.75	66	36.25	0.191224	0.0905919
ENSRNA049447392:15-34	GTTGGTTAGGATACTCGGCT	20	GluCTC	D;	18	8.79	15	8.24	-0.0932188	0.760933
ENSRNA049447392:22-41	AGGATACTCGGCTCTCACCC	20	GluCTC	Others;	1	0.49	4	2.2	2.16665	0.113916
ENSRNA049447405:1-20	GTTGCTGTGGTGTAGTGGTT	20	ValTAC	5e;	17	8.3	15	8.24	-0.010467	0.646221
ENSRNA049447405:34-53	TACACACTAAAGGTCCCCAG	20	ValTAC	A;	0	0.01	1	0.55	5.78136	0.370857
ENSRNA049447405:54-73	TTCGATCCTGGGCAGCAACA	20	ValTAC	3e;	2	0.98	2	1.1	0.16665	0.743124
ENSRNA049447478:1-22	GGTTCTATGGTGTAGTGGTTAG	22	GlnTTG	5e;	6	2.93	9	4.94	0.75361	0.188813
ENSRNA049447478:24-40	ACTCTGGACTTTGAATC	17	GlnTTG	Others;	1	0.49	0	0.01	-5.61471	0.648401
ENSRNA049447478:35-55	TGAATCCAGCGACCTGGGTTC	21	GlnTTG	A;	1	0.49	0	0.01	-5.61471	0.648401
ENSRNA049447478:55-72	CGACTCCCGGTAGGACCT	18	GlnTTG	3e;	1	0.49	0	0.01	-5.61471	0.648401
ENSRNA049447500:1-19	GCTTTCATAGCTCAGTTGG	19	ThrAGT	5e;	1	0.49	3	1.65	1.75161	0.225388
ENSRNA049447500:19-41	GTTAGAGCACCCGTTTAGTAAGC	23	ThrAGT	Others;	0	0.01	1	0.55	5.78136	0.370857
ENSRNA049447500:32-55	TTTAGTAAGCGGGAGGTCTTGAGT	24	ThrAGT	A;	1	0.49	0	0.01	-5.61471	0.648401
ENSRNA049447500:38-61	AAGCGGGAGGTCTTGAGTTCGACT	24	ThrAGT	Others;	0	0.01	1	0.55	5.78136	0.370857
ENSRNA049447500:48-71	TCTTGAGTTCGACTTTCAATGAAA	24	ThrAGT	V;3e;	0	0.01	1	0.55	5.78136	0.370857
ENSRNA049447517:1-19	GCCTCCGTAGCATAGTGGT	19	ThrCGT	5e;	2	0.98	1	0.55	-0.83335	0.846126
ENSRNA049447517:39-56	CGAAAGGCCGCGAGTTCG	18	ThrCGT	A;	1	0.49	0	0.01	-5.61471	0.648401
ENSRNA049447550:1-19	GCGCCCATGGCCTAATGGA	19	ArgTCT	5e;	12	5.86	8	4.39	-0.41668	0.819308
ENSRNA049447550:21-41	AAGGCACTTGACTTCTAATCA	21	ArgTCT	Others;	3	1.47	5	2.75	0.903615	0.274945
ENSRNA049447550:27-47	CTTGACTTCTAATCAAGGGAT	21	ArgTCT	A;	1	0.49	1	0.55	0.16665	0.793178
ENSRNA049447550:32-55	CTTCTAATCAAGGGATTGTGGGTT	24	ArgTCT	A;	7	3.42	8	4.39	0.360225	0.414807
ENSRNA049447684:1-21	GTGGTCGTGCCGGAGTGGTTA	21	SerAGA	5e;	96	46.9	105	57.67	0.298233	0.0088408
ENSRNA049447684:13-34	GAGTGGTTATCGGGCATGACTA	22	SerAGA	D;	0	0.01	1	0.55	5.78136	0.370857
ENSRNA049447684:63-80	TTCGAATCCTGCCGACCA	18	SerAGA	3e;	1	0.49	0	0.01	-5.61471	0.648401
ENSRNA049447701:1-20	GTCGATATGTCCGAGTGGTT	20	SerTGA	5e;	36	17.59	31	17.03	-0.046677	0.584513
ENSRNA049447701:16-36	TGGTTAAGGAGACAGACTTGA	21	SerTGA	D;	1	0.49	0	0.01	-5.61471	0.648401
ENSRNA049447701:22-41	AGGAGACAGACTTGAAATCT	20	SerTGA	Others;	0	0.01	1	0.55	5.78136	0.370857
ENSRNA049447701:34-51	TGAAATCTGTTGGGCTTC	18	SerTGA	A;	26	12.7	17	9.34	-0.443334	0.664225
ENSRNA049447701:42-64	GTTGGGCTTCGCCCGCGCAGGTT	23	SerTGA	A;V;	0	0.01	2	1.1	6.78136	0.159696
ENSRNA049447701:62-76	GTTCGAACCCTGCTG	15	SerTGA	V;3e;	1	0.49	0	0.01	-5.61471	0.648401
ENSRNA049447784:1-22	TCCGTTGTAGTCTAGTTGGTTA	22	GluCTC	5e;	86	42.01	62	34.05	-0.303078	0.786243
ENSRNA049447784:15-34	GTTGGTTAGGATACTCGGCT	20	GluCTC	D;	19	9.28	20	10.98	0.242681	0.295807
ENSRNA049447784:22-41	AGGATACTCGGCTCTCACCC	20	GluCTC	Others;	4	1.95	5	2.75	0.495957	0.443816
ENSRNA049447784:35-52	CTCACCCGAGAGACCCGG	18	GluCTC	A;	1	0.49	0	0.01	-5.61471	0.648401
ENSRNA049447784:41-61	CGAGAGACCCGGGTTCAAGTC	21	GluCTC	V;	0	0.01	1	0.55	5.78136	0.370857
ENSRNA049447846:1-19	GCCCCTATAGCTCAGTGGT	19	ThrTGT	5e;	8	3.91	6	3.3	-0.244703	0.973242
ENSRNA049447846:33-51	TGTAAACTGAAGGTCTGTA	19	ThrTGT	A;	3	1.47	1	0.55	-1.41831	0.572292
ENSRNA049447846:44-72	GGTCTGTAGTTCGATCCTGCATGGGGGCA	29	ThrTGT	3e;	0	0.01	1	0.55	5.78136	0.370857
ENSRNA049447846:50-66	TAGTTCGATCCTGCATG	17	ThrTGT	V;3e;	0	0.01	3	1.65	7.36632	0.0687674
ENSRNA049447889:1-21	CCGACCATAGCTCAGTTGGTA	21	TyrGTA	5e;	26	12.7	20	10.98	-0.20995	0.933357
ENSRNA049447889:27-49	GAGGACTGTAGTGGGCAAAGCCT	23	TyrGTA	A;	0	0.01	2	1.1	6.78136	0.159696
ENSRNA049447889:63-81	TAGGTCACTGGTTCGAATC	19	TyrGTA	Others;	1	0.49	0	0.01	-5.61471	0.648401
ENSRNA049447909:12-29	CCAATGGATAAGGCGCTG	18	ArgACG	D;	1	0.49	0	0.01	-5.61471	0.648401
ENSRNA049447975:1-21	GTGGACGTGCCGGAGTGGTTA	21	SerAGA	5e;	1123	548.6	849	466.27	-0.234589	0.997156
ENSRNA049447975:35-53	GAAATCATGTGGGCTCTGC	19	SerAGA	A;	0	0.01	1	0.55	5.78136	0.370857
ENSRNA049447975:43-67	GTGGGCTCTGCCCGCGCAGGTTCGA	25	SerAGA	A;V;	0	0.01	1	0.55	5.78136	0.370857
ENSRNA049447986:1-21	GGTCCTGTAGCTCAGTTGGTT	21	IleTAT	5e;	135	65.95	93	51.08	-0.368614	0.496348
ENSRNA049448076:1-21	GATCGCGTGGCCTAATGGATA	21	ArgCCG	5e;	0	0.01	2	1.1	6.78136	0.159696
ENSRNA049448076:39-55	GCGGGAGATTGTGGGTT	17	ArgCCG	A;	18	8.79	5	2.75	-1.67643	0.0405662
ENSRNA049448104:1-20	GTCAAGATGGCCGAGTTGGT	20	LeuCAG	5e;	15	7.33	17	9.34	0.349609	0.248163
ENSRNA049448104:18-40	GGTCTAAGGCGCCAGTTTCAGGT	23	LeuCAG	Others;	0	0.01	1	0.55	5.78136	0.370857
ENSRNA049448104:31-49	AGTTTCAGGTACTGGTCCG	19	LeuCAG	A;	1	0.49	0	0.01	-5.61471	0.648401
ENSRNA049448104:48-69	CGAAAGGGCATGGGTTCGAATC	22	LeuCAG	V;	0	0.01	2	1.1	6.78136	0.159696
ENSRNA049448125:12-33	CTAGTTGGTTAGGATACTTGGC	22	GluCTC	D;	0	0.01	1	0.55	5.78136	0.370857
ENSRNA049448125:22-45	AGGATACTTGGCTCTCACCCGAGA	24	GluCTC	Others;	1	0.49	0	0.01	-5.61471	0.648401
ENSRNA049448125:40-62	CCGAGAGACCCGGGTTCAAGTCC	23	GluCTC	Others;	0	0.01	1	0.55	5.78136	0.370857
ENSRNA049448141:1-20	ATCAAAGTGGCGCAGCGGAA	20	MetCAT	5e;	5	2.44	0	0.01	-7.93074	0.0681507
ENSRNA049448141:15-36	GCGGAAGCGTGGTGGGCCCATA	22	MetCAT	Others;	3	1.47	8	4.39	1.5784	0.0521019
ENSRNA049448141:49-70	CAGGATCGAAACCTGGCTTTGA	22	MetCAT	3e;	0	0.01	1	0.55	5.78136	0.370857
ENSRNA049448149:1-22	GCCCGTATAGCTCAGTGGTAGA	22	ThrTGT	5e;	4	1.95	10	5.49	1.49333	0.0352423
ENSRNA049448149:45-66	GTCTGTAGTTCGATCCTGCATG	22	ThrTGT	V;3e;	1	0.49	4	2.2	2.16665	0.113916
ENSRNA049448149:53-71	TTCGATCCTGCATGTGGGC	19	ThrTGT	3e;	0	0.01	1	0.55	5.78136	0.370857
ENSRNA049448195:1-20	TCCGTTGTAGTCTAGTTGGT	20	GluTTC	5e;	100	48.85	77	42.29	-0.208042	0.894856
ENSRNA049448195:15-34	GTTGGTTAGGATACTCGGCT	20	GluTTC	D;	13	6.35	12	6.59	0.0535219	0.601639
ENSRNA049448195:31-52	GGCTTTCACCCGAGAGACCCGG	22	GluTTC	A;	0	0.01	1	0.55	5.78136	0.370857
ENSRNA049448224:1-26	GGTTCTATGGTCTAGCGGTTAGGACA	26	GlnCTG	Others;	41	20.03	23	12.63	-0.665308	0.259883
ENSRNA049448224:21-52	AGGACATTGGACTCTGAATCCAATAGCCCGAG	32	GlnCTG	Others;	1	0.49	1	0.55	0.16665	0.793178
ENSRNA049448224:26-45	ATTGGACTCTGAATCCAATA	20	GlnCTG	Others;	2	0.98	0	0.01	-6.61471	0.36919
ENSRNA049448224:39-59	TCCAATAGCCCGAGTTCAATT	21	GlnCTG	Others;	1	0.49	0	0.01	-5.61471	0.648401
ENSRNA049448224:43-61	ATAGCCCGAGTTCAATTCT	19	GlnCTG	V;	1	0.49	0	0.01	-5.61471	0.648401
ENSRNA049448482:1-21	CCGACCTTAGCTCAGTTGGTA	21	TyrGTA	5e;	11	5.37	5	2.75	-0.96549	0.374586
ENSRNA049448482:16-35	TTGGTAGAGCGGAGGACTGT	20	TyrGTA	D;	3	1.47	0	0.01	-7.19967	0.210212
ENSRNA049448498:1-22	CCGACCTTAGCTCAGTTGGTAG	22	TyrGTA	5e;	5	2.44	9	4.94	1.01763	0.114038
ENSRNA049448498:17-37	TGGTAGAGCGGAGGACTGTAG	21	TyrGTA	Others;	1	0.49	0	0.01	-5.61471	0.648401
ENSRNA049448498:59-78	ATCCTTAGGTCGCTGGTTCG	20	TyrGTA	3e;	0	0.01	1	0.55	5.78136	0.370857
ENSRNA049448507:11-30	CTCAGTTGGTAGAGCGGAGG	20	TyrGTA	D;	1	0.49	0	0.01	-5.61471	0.648401
ENSRNA049448507:1-21	CCGACCTTAGCTCAGTTGGTA	21	TyrGTA	5e;	11	5.37	10	5.49	0.0318841	0.653633
ENSRNA049448507:61-78	CCTTAGGTCGCTGGTTCG	18	TyrGTA	Others;	1	0.49	0	0.01	-5.61471	0.648401
ENSRNA049448516:11-31	CTCAGTTGGTAGAGCGGAGGA	21	TyrGTA	D;	1	0.49	1	0.55	0.16665	0.793178
ENSRNA049448516:1-21	CCGACCTTAGCTCAGTTGGTA	21	TyrGTA	5e;	14	6.84	14	7.69	0.168987	0.448777
ENSRNA049448516:60-75	CCTTAGGCCGCTGGTT	16	TyrGTA	3e;	1	0.49	0	0.01	-5.61471	0.648401
ENSRNA049448516:77-92	GAATCCGGCAGGTCGG	16	TyrGTA	Others;	3	1.47	0	0.01	-7.19967	0.210212
ENSRNA049448526:1-24	CCGACCTTAGCTCAGTTGGTAGAG	24	TyrGTA	5e;	3	1.47	4	2.2	0.581687	0.44924
ENSRNA049448526:14-31	AGTTGGTAGAGCGGAGGA	18	TyrGTA	D;	0	0.01	1	0.55	5.78136	0.370857
ENSRNA049448537:11-29	CTCAGTTGGTAGAGCGGAG	19	TyrGTA	D;	0	0.01	1	0.55	5.78136	0.370857
ENSRNA049448537:1-22	CCGACCTTAGCTCAGTTGGTAG	22	TyrGTA	5e;	10	4.89	5	2.75	-0.830403	0.48817
ENSRNA049448537:18-36	GGTAGAGCGGAGGACTGTA	19	TyrGTA	Others;	0	0.01	2	1.1	6.78136	0.159696
ENSRNA049448537:74-89	GTTCGAATCCGGCAGG	16	TyrGTA	Others;	0	0.01	1	0.55	5.78136	0.370857
ENSRNA049448549:1-23	CCGACCTTAGCTCAGTTGGTAGA	23	TyrGTA	5e;	6	2.93	3	1.65	-0.828435	0.61751
ENSRNA049448549:14-37	AGTTGGTAGAGCGGAAGACTGTAG	24	TyrGTA	D;	1	0.49	0	0.01	-5.61471	0.648401
ENSRNA049448549:23-45	AGCGGAAGACTGTAGTGGGTGTA	23	TyrGTA	Others;	0	0.01	1	0.55	5.78136	0.370857
ENSRNA049448549:28-52	AAGACTGTAGTGGGTGTAAGCCTGT	25	TyrGTA	A;	1	0.49	0	0.01	-5.61471	0.648401
ENSRNA049448549:45-66	AAGCCTGTCAGAAAATCTTTAG	22	TyrGTA	V;3e;	3	1.47	1	0.55	-1.41831	0.572292
ENSRNA049448549:56-77	AAAATCTTTAGGTCGCTGGTTC	22	TyrGTA	3e;	1	0.49	0	0.01	-5.61471	0.648401
ENSRNA049448572:1-23	CCGACCTTAGCTCAGTTGGTAGA	23	TyrGTA	5e;	6	2.93	6	3.3	0.171565	0.608265
ENSRNA049448572:16-36	TTGGTAGAGCGGAAGACTGTA	21	TyrGTA	D;	3	1.47	0	0.01	-7.19967	0.210212
ENSRNA049448572:22-42	GAGCGGAAGACTGTAGTTGGT	21	TyrGTA	Others;	0	0.01	1	0.55	5.78136	0.370857
ENSRNA049448572:24-44	GCGGAAGACTGTAGTTGGTGA	21	TyrGTA	Others;	0	0.01	1	0.55	5.78136	0.370857
ENSRNA049448572:31-55	ACTGTAGTTGGTGAAAAGCCTGGCA	25	TyrGTA	A;	0	0.01	1	0.55	5.78136	0.370857
ENSRNA049448572:45-66	AAAGCCTGGCAGATAATCTTTA	22	TyrGTA	V;3e;	1	0.49	0	0.01	-5.61471	0.648401
ENSRNA049448572:54-75	CAGATAATCTTTAGGTCGCTGG	22	TyrGTA	3e;	2	0.98	0	0.01	-6.61471	0.36919
ENSRNA049448638:1-20	TCCTCAGTAGCTCAGTGGTA	20	AsnGTT	5e;	165	80.6	80	43.94	-0.875245	0.00091329
ENSRNA049448638:15-33	GTGGTAGAGCGGTCGGCTG	19	AsnGTT	D;	22	10.75	12	6.59	-0.705986	0.381356
ENSRNA049448638:21-39	GAGCGGTCGGCTGTTAACC	19	AsnGTT	Others;	14	6.84	8	4.39	-0.639775	0.559767
ENSRNA049448638:29-50	GGCTGTTAACCGATTGGTCGTA	22	AsnGTT	A;	24	11.72	21	11.53	-0.0235801	0.611287
ENSRNA049448638:36-56	AACCGATTGGTCGTAGGTTCG	21	AsnGTT	A;	4	1.95	1	0.55	-1.82597	0.377396
ENSRNA049448638:41-61	ATTGGTCGTAGGTTCGAATCC	21	AsnGTT	V;	2	0.98	1	0.55	-0.83335	0.846126
ENSRNA049448638:52-69	GTTCGAATCCTACTTGGG	18	AsnGTT	3e;	0	0.01	1	0.55	5.78136	0.370857
ENSRNA049448657:1-18	GACTCTGTGGCCCAATGG	18	ArgACG	5e;	2	0.98	0	0.01	-6.61471	0.36919
ENSRNA049448674:1-22	CCGACCTTAGCTCAGTTGGTAG	22	TyrGTA	5e;	7	3.42	4	2.2	-0.636493	0.7081
ENSRNA049448674:18-33	GGTAGAGCGGAGGACT	16	TyrGTA	D;	1	0.49	1	0.55	0.16665	0.793178
ENSRNA049448674:24-45	GCGGAGGACTGTAGTTGTTGCT	22	TyrGTA	Others;	0	0.01	1	0.55	5.78136	0.370857
ENSRNA049448674:28-43	AGGACTGTAGTTGTTG	16	TyrGTA	A;	1	0.49	0	0.01	-5.61471	0.648401
ENSRNA049448674:33-56	TGTAGTTGTTGCTGTTATCCTTAG	24	TyrGTA	A;	0	0.01	1	0.55	5.78136	0.370857
ENSRNA049448674:50-71	TCCTTAGGTCGCTGGTTCGAAT	22	TyrGTA	3e;	1	0.49	0	0.01	-5.61471	0.648401
ENSRNA049448708:1-21	GGTGGTTTGCCCGAGTGGTTA	21	LeuTAA	5e;	6	2.93	0	0.01	-8.19476	0.0388041
ENSRNA049448708:13-34	GAGTGGTTAAGGGGGAAGACTT	22	LeuTAA	D;	1	0.49	0	0.01	-5.61471	0.648401
ENSRNA049448708:19-39	TTAAGGGGGAAGACTTAAGAT	21	LeuTAA	Others;	0	0.01	1	0.55	5.78136	0.370857
ENSRNA049448708:27-52	GAAGACTTAAGATCTTCTGCACATAA	26	LeuTAA	A;	0	0.01	1	0.55	5.78136	0.370857
ENSRNA049448708:38-60	ATCTTCTGCACATAAGTGCGCGT	23	LeuTAA	A;	0	0.01	1	0.55	5.78136	0.370857
ENSRNA049448708:50-67	TAAGTGCGCGTGGGTTCG	18	LeuTAA	A;V;	0	0.01	2	1.1	6.78136	0.159696
ENSRNA049448722:1-21	GTCAATATGTCCGAGTGGTTA	21	SerCGA	5e;	14	6.84	7	3.84	-0.83289	0.397708
ENSRNA049448722:34-51	CGAAATCTGTTGGGCTTT	18	SerCGA	A;	2	0.98	3	1.65	0.751612	0.448333
ENSRNA049448722:43-60	TTGGGCTTTGCCTGCGCA	18	SerCGA	A;V;	0	0.01	1	0.55	5.78136	0.370857
ENSRNA049448722:63-78	TTCGAATCCTGCTGTT	16	SerCGA	V;3e;	9	4.4	12	6.59	0.582775	0.193745
ENSRNA049448744:1-20	GACCGCATAGCGCAGTGGAT	20	ArgTCG	5e;	93	45.43	68	37.35	-0.282537	0.844449
ENSRNA049448744:20-41	TTAGCGCGTTTGACTTCGGATC	22	ArgTCG	Others;	1	0.49	0	0.01	-5.61471	0.648401
ENSRNA049448744:25-46	GCGTTTGACTTCGGATCAAAAG	22	ArgTCG	Others;	1	0.49	0	0.01	-5.61471	0.648401
ENSRNA049448744:30-49	TGACTTCGGATCAAAAGGTC	20	ArgTCG	A;	1	0.49	0	0.01	-5.61471	0.648401
ENSRNA049448744:37-57	GGATCAAAAGGTCGTGGGTTC	21	ArgTCG	A;	2	0.98	1	0.55	-0.83335	0.846126
ENSRNA049448744:55-73	TTCGACTCCCACTGTGGTC	19	ArgTCG	3e;	1	0.49	0	0.01	-5.61471	0.648401
ENSRNA049448784:1-22	GTCGCTTTGGCCGAGTGGTTAA	22	SerGCT	5e;	4	1.95	2	1.1	-0.825971	0.71031
ENSRNA049448784:36-51	TAAGTAAGTGGGGTTT	16	SerGCT	A;	1	0.49	0	0.01	-5.61471	0.648401
ENSRNA049448784:48-71	GTTTCCCCGCGTGAGTTCGAATCT	24	SerGCT	V;	2	0.98	0	0.01	-6.61471	0.36919
ENSRNA049448839:1-21	GCTCTTGTAGCTCAGTTGGTT	21	ThrAGT	5e;	58	28.33	40	21.97	-0.366796	0.668401
ENSRNA049448839:41-56	CGGGAGGTCTTGAGTT	16	ThrAGT	A;	1	0.49	0	0.01	-5.61471	0.648401
ENSRNA049448881:1-21	GCACCCGTGGCCTAATGGATA	21	ArgTCT	5e;	5	2.44	4	2.2	-0.149378	0.890402
ENSRNA049448881:14-36	AATGGATAAGGCGTCTGACTTCT	23	ArgTCT	D;	2	0.98	0	0.01	-6.61471	0.36919
ENSRNA049448881:31-55	ACTTCTAATCAGGCGATTGTGGGTT	25	ArgTCT	A;	3	1.47	5	2.75	0.903615	0.274945
ENSRNA049448881:54-69	TTCGAGTCCCACCGGG	16	ArgTCT	V;3e;	0	0.01	1	0.55	5.78136	0.370857
ENSRNA049448881:56-71	CGAGTCCCACCGGGTG	16	ArgTCT	3e;	1	0.49	0	0.01	-5.61471	0.648401
ENSRNA049448944:11-34	TGTAGTGGTTATCACGTCAGTCTT	24	ValTAC	D;	0	0.01	1	0.55	5.78136	0.370857
ENSRNA049448944:1-22	GTTGGTGTGGTGTAGTGGTTAT	22	ValTAC	5e;	49	23.94	37	20.32	-0.236523	0.989671
ENSRNA049448944:52-69	AGTTCGATCCTGGGCATC	18	ValTAC	V;3e;	0	0.01	1	0.55	5.78136	0.370857
ENSRNA049448963:1-22	GTTGGTGTGGTGTAGTGGTTAT	22	ValTAC	5e;	57	27.85	48	26.36	-0.079327	0.573551
ENSRNA049448963:14-34	AGTGGTTATCACGTCAGTCTT	21	ValTAC	D;	2	0.98	6	3.3	1.75161	0.0772209
ENSRNA049449018:12-33	TAGTGGTTATCACGTCAGTCTT	22	ValTAC	D;	3	1.47	3	1.65	0.16665	0.702215
ENSRNA049449018:1-24	GTTGGTGGGTGTAGTGGTTATCAC	24	ValTAC	5e;	0	0.01	1	0.55	5.78136	0.370857
ENSRNA049449018:27-50	CAGTCTTACACACTGAAGGTCCCC	24	ValTAC	A;	1	0.49	0	0.01	-5.61471	0.648401
ENSRNA049449018:50-65	CAGTTCGATCCTGGGC	16	ValTAC	V;3e;	0	0.01	1	0.55	5.78136	0.370857
ENSRNA049449060:1-18	GCGGGGATAGCTCAGTTG	18	PheGAA	5e;	803	392.27	430	236.15	-0.732143	4.7e-09
ENSRNA049449060:15-31	GTTGGGAGAGCGTCAGA	17	PheGAA	D;	1	0.49	0	0.01	-5.61471	0.648401
ENSRNA049449060:41-56	TGAAGGTCACGTGTTC	16	PheGAA	A;V;	1	0.49	0	0.01	-5.61471	0.648401
ENSRNA049449075:1-18	GGTTCTATGGTCTAGTGG	18	GlnCTG	5e;	1	0.49	0	0.01	-5.61471	0.648401
ENSRNA049449075:12-31	CTAGTGGTCAGGACATTGGA	20	GlnCTG	D;	0	0.01	1	0.55	5.78136	0.370857
ENSRNA049449075:21-45	AGGACATTGGACTCTGAATCCAGTA	25	GlnCTG	Others;	1	0.49	1	0.55	0.16665	0.793178
ENSRNA049449075:30-50	GACTCTGAATCCAGTAACCCG	21	GlnCTG	A;	1	0.49	1	0.55	0.16665	0.793178
ENSRNA049449177:1-20	GACCGCATAGCGCAGTGGAT	20	ArgTCG	5e;	88	42.99	67	36.8	-0.224295	0.955235
ENSRNA049449177:39-56	ATCAAAAGGTCGTGGGTT	18	ArgTCG	A;	8	3.91	4	2.2	-0.829665	0.546169

## Sheet: Table S2
Table S2 The differential expression levels in the control (C1D) and ABA-treatment (A1D) libraries of tRFs after reducing noise
tRF ID	Sequence	C1D-counts	C1D-RPM	A1D-counts	A1D-RPM	fold-change(log2 A1D/C1D)
ENSRNA049441319:1-21	CCGACCTTAGCTCAGTTGGTA	11	5.37	12	6.59	0.295356
ENSRNA049441652:1-25	GTCGTTGTAGTATAGTGGTAAGTAT	96	46.9	116	63.71	0.441932
ENSRNA049441652:39-66	GCGGGTGACCCGGGTTCGATCCCCGGCA	1	0.49	9	4.94	3.33366
ENSRNA049441732:1-20	GTCAAGATGGCCGAGTTGGT	17	8.3	14	7.69	-0.110128
ENSRNA049441739:1-21	GTGGACGTGCCGGAGTGGTTA	1066	520.75	839	460.77	-0.176544
ENSRNA049441822:1-19	GCGCCTGTAGCTCAGTGGA	169	82.56	101	55.47	-0.573735
ENSRNA049441822:39-55	GCAGAAGGTCGTAGGTT	36	17.59	15	8.24	-1.09404
ENSRNA049441856:11-31	TGTAGTGGTTAGCACTCTGGA	5	2.44	0	0.001	-11.2527
ENSRNA049441856:1-22	GGTTCTATGGTGTAGTGGTTAG	6	2.93	4	2.2	-0.413397
ENSRNA049441906:1-23	GTACCAGTGGTCTAGTGGTAGAA	6	2.93	5	2.75	-0.091469
ENSRNA049441906:22-41	AATAGTACCCTGCCACGGTA	1	0.49	5	2.75	2.48858
ENSRNA049441922:1-21	GCCCGTCTAGCTCAGTTGGTA	15	7.33	8	4.39	-0.739592
ENSRNA049441992:1-20	GCTGGAATAGCTCAGTTGGT	55	26.87	38	20.87	-0.364566
ENSRNA049442006:1-20	GCTTCCGTAGCATAGTGGTA	7	3.42	1	0.55	-2.63649
ENSRNA049442061:1-19	GCGCCCATTGCCTAATGGA	14	6.84	10	5.49	-0.31719
ENSRNA049442061:38-55	ATCAAGCGATTGTGGGTT	11	5.37	5	2.75	-0.96549
ENSRNA049442243:1-20	TTCGTTATCGTCCAGCGGTT	70	34.2	46	25.26	-0.437142
ENSRNA049442273:1-20	GCGTTTGTAGTCCAACGGTT	2539	1240.33	1925	1057.2	-0.230476
ENSRNA049442273:34-54	TCCAAGCAATAGATCCGGGTT	9	4.4	6	3.3	-0.415037
ENSRNA049442298:1-19	GCCCCTATAGCTCAGTGGT	6	2.93	7	3.84	0.390206
ENSRNA049442298:44-71	GGTCTGTAGTTCGATCCTGCATGGGGGC	2	0.98	5	2.75	1.48858
ENSRNA049442319:1-20	GTCGATATGTCCGAGTGGTT	41	20.03	40	21.97	0.133372
ENSRNA049442319:34-51	TGAAATCTGTTGGGCTTC	34	16.61	15	8.24	-1.01134
ENSRNA049442319:63-79	TTCGAACCCTGCTGTCG	6	2.93	8	4.39	0.58332
ENSRNA049442319:68-82	ACCCTGCTGTCGACG	10	4.89	3	1.65	-1.56737
ENSRNA049442379:1-25	GTCGTTGTAGTATAGTGGTAAGTAT	105	51.29	120	65.9	0.361601
ENSRNA049442379:55-70	CGATCCCCGGCAGCGG	6	2.93	6	3.3	0.171565
ENSRNA049442496:1-21	GCGTCTGTAGTCCAACGGTTA	2697	1317.52	2162	1187.36	-0.150067
ENSRNA049442587:1-19	GACAGTTTGGCCGAGTGGT	52	25.4	36	19.77	-0.361516
ENSRNA049442587:30-50	AGATTTAGGCTCTGGTCCGAA	7	3.42	6	3.3	-0.0515303
ENSRNA049442587:48-64	GAAAGGGCGTGGGTTCA	19	9.28	13	7.14	-0.378201
ENSRNA049442622:1-25	GGGTCCATAGCTCAGTGGTAGAGCA	38	18.56	48	26.36	0.506154
ENSRNA049442622:16-35	TGGTAGAGCATTTGACTGCA	118	57.64	115	63.16	0.131941
ENSRNA049442622:25-41	ATTTGACTGCAGATCAA	7	3.42	10	5.49	0.68281
ENSRNA049442654:1-20	GTTGCTGTGGTGTAGTGGTT	20	9.77	13	7.14	-0.452434
ENSRNA049442665:1-22	TCCGTTGTAGTCTAGTTGGTTA	70	34.2	71	38.99	0.189108
ENSRNA049442665:14-34	AGTTGGTTAGGATACTCGGCT	11	5.37	10	5.49	0.0318841
ENSRNA049442665:22-41	AGGATACTCGGCTCTCACCC	5	2.44	5	2.75	0.17255
ENSRNA049442689:1-21	ATCAGAGTGGCGCAGCGGAAG	22	10.75	11	6.04	-0.831716
ENSRNA049442689:15-37	GCGGAAGCGTGGTGGGCCCATAA	3	1.47	9	4.94	1.74869
ENSRNA049442702:1-21	GCTGGTTTGCCCGAGAGGTTA	12	5.86	14	7.69	0.392083
ENSRNA049442803:1-20	GCGTTTGTAGTCCAACGGTT	2528	1234.96	2022	1110.47	-0.153294
ENSRNA049442809:1-21	GCGTCTGTAGTCCAACGGTTA	2679	1308.72	2152	1181.86	-0.147097
ENSRNA049442809:33-54	TTCCAAGCAATAGACCCGGGTT	0	0.001	4	2.2	11.1033
ENSRNA049442840:1-21	GCCCGTCTAGCTCAGTTGGTA	13	6.35	8	4.39	-0.532536
ENSRNA049442854:1-21	GTCTGGGTGGTGTAGTCGGTT	659	321.93	570	313.04	-0.0404
ENSRNA049442867:1-21	GGTTTCGTGGTGTAGTTGGTT	75	36.64	66	36.25	-0.0154385
ENSRNA049442922:1-17	TCCGTTATCGTCCAGCG	431	210.55	92	50.53	-2.05895
ENSRNA049443021:1-20	GACCGCATAGCGCAGTGGAT	102	49.83	64	35.15	-0.50349
ENSRNA049443021:39-56	ATCAGAAGGTCGTGGGTT	14	6.84	6	3.3	-1.05153
ENSRNA049443034:1-20	TCCGTCATCGTCCAGCGGTT	3	1.47	4	2.2	0.581687
ENSRNA049443034:30-51	GGCTTTCACCCAGGAGACCCGG	6	2.93	5	2.75	-0.091469
ENSRNA049443103:1-24	GGGGGTGTAGCTCATATGGTAGAG	1604	783.57	1542	846.86	0.112061
ENSRNA049443146:1-20	GGCCCATTAGCTCAGTTGGT	9	4.4	9	4.94	0.167008
ENSRNA049443178:1-28	GGGCATTTGGTCTAGTGGTATGATTCTC	0	0.001	7	3.84	11.9069
ENSRNA049443178:14-33	AGTGGTATGATTCTCGCTTT	5	2.44	4	2.2	-0.149378
ENSRNA049443263:1-23	GGTTTCGTGGTGTAGTTGGTTAT	39	19.05	26	14.28	-0.415795
ENSRNA049443345:1-24	GCGCATCTGGTGTAGTGGTATCAT	36	17.59	35	19.22	0.127853
ENSRNA049443377:1-19	GTCAGGATGGCCGAGTGGT	78	38.1	67	36.8	-0.0500852
ENSRNA049443377:30-50	AGACTCAAGTTCTGGTCTTCG	9	4.4	5	2.75	-0.678072
ENSRNA049443377:47-68	TTCGTAAGAGGGCGTGGGTTCA	9	4.4	30	16.48	1.90514
ENSRNA049443386:1-21	CCGACCTTAGCTCAGTTGGTA	10	4.89	6	3.3	-0.567368
ENSRNA049443411:1-23	GGTGTCGTGGTGTAGTTGGTTAT	1119	546.64	966	530.52	-0.0431839
ENSRNA049443480:1-18	GCGGGGATAGCTCAGTTG	721	352.22	389	213.64	-0.721295
ENSRNA049443502:1-18	GCGGGGATAGCTCAGTTG	771	376.64	380	208.69	-0.851825
ENSRNA049443589:1-23	GGTGTCGTGGTGTAGTTGGTTAT	1140	556.9	941	516.79	-0.10784
ENSRNA049443600:1-18	GTTGAGATGGCCGAGTTG	86	42.01	65	35.7	-0.234809
ENSRNA049443600:47-65	CCGAAAGGGCGTGGGTTCA	12	5.86	9	4.94	-0.24639
ENSRNA049443612:1-20	GCTGGAATAGCTCAGTTGGT	48	23.45	38	20.87	-0.168157
ENSRNA049443612:38-58	AACCACAAGGTCGGAGGTTCA	5	2.44	2	1.1	-1.14938
ENSRNA049443628:1-20	GCCGTCTTAGCTCAGTGGTA	9	4.4	10	5.49	0.319303
ENSRNA049443699:1-20	GGGGATGTAGCTCAGATGGT	61730	30155.8	44682	24539.1	-0.297355
ENSRNA049443699:38-57	TGCGAGAGGTACGGGGATCG	17	8.3	10	5.49	-0.596305
ENSRNA049443924:1-21	GGCCCATTAGCTCAGTTGGTT	12	5.86	13	7.14	0.285023
ENSRNA049443924:55-69	TTCGGGACCTGCATG	4	1.95	5	2.75	0.495957
ENSRNA049444052:1-20	GACCGCATAGCGCAGTGGAT	110	53.74	74	40.64	-0.403096
ENSRNA049444052:40-57	TCAAAAGGTCGTGGGTTC	5	2.44	1	0.55	-2.14938
ENSRNA049444183:1-19	GCCCTTATAGCTCAGTGGT	2	0.98	4	2.2	1.16665
ENSRNA049444226:1-21	GGTTTCGTGGTGTAGTTGGTT	73	35.66	57	31.3	-0.188144
ENSRNA049444226:55-71	TTCGAGTCCGGGCGAAG	4	1.95	7	3.84	0.977632
ENSRNA049444245:1-21	GGTTTCGTGGTGTAGTTGGTT	75	36.64	66	36.25	-0.0154385
ENSRNA049444333:1-21	TCCATTGTCGTCCAGCGGTTA	46	22.47	37	20.32	-0.1451
ENSRNA049444342:1-23	GGTGTCGTAGTGTAGTTGGTTAT	766	374.2	823	451.99	0.272481
ENSRNA049444342:38-56	ACACTGAAGGTCTCCGGTT	4	1.95	5	2.75	0.495957
ENSRNA049444386:1-21	GGTTTCGTGGTGTAGTTGGTT	83	40.55	86	47.23	0.220002
ENSRNA049444401:1-23	CCGACCTTAGCTCAGTTGGTAGA	8	3.91	4	2.2	-0.829665
ENSRNA049444442:1-22	CCGACCTTAGCTCAGTTGGTAG	4	1.95	7	3.84	0.977632
ENSRNA049444506:1-22	GCTGGAGTAGCTCAGTTGGTTA	14	6.84	18	9.89	0.531974
ENSRNA049444506:39-59	ACCACAAGGTCGAAGGTTCAA	1	0.49	4	2.2	2.16665
ENSRNA049444566:1-22	TTCGTTGTAGTCTAGTTGGTTA	6	2.93	6	3.3	0.171565
ENSRNA049444566:14-34	AGTTGGTTAGGATACTCGGCT	13	6.35	10	5.49	-0.20995
ENSRNA049444566:21-40	TAGGATACTCGGCTCTCACC	5	2.44	3	1.65	-0.564415
ENSRNA049444610:1-28	GGGCGTTTGGTCTAGTGGTATGATTCTC	0	0.001	7	3.84	11.9069
ENSRNA049444610:14-34	AGTGGTATGATTCTCGCTTTG	2	0.98	4	2.2	1.16665
ENSRNA049444613:1-28	GGGCGTTTGGTCTAGTGGTATGATTCTC	0	0.001	6	3.3	11.6883
ENSRNA049444613:31-51	TTTGGGTGCGAGAGGTCCCGA	6	2.93	5	2.75	-0.091469
ENSRNA049444625:1-20	GTGAGCGTGCCGGAGTGGTT	35	17.1	29	15.93	-0.10225
ENSRNA049444627:1-19	GCGTCTGTAGCTCAGTGGA	45	21.98	31	17.03	-0.368113
ENSRNA049444627:39-54	GCAGAAGGTCGTAGGT	43	21.01	18	9.89	-1.08703
ENSRNA049444629:14-34	AGTTGGTTAGGATACTCGGCT	9	4.4	14	7.69	0.80548
ENSRNA049444638:1-20	GCACCAGTGGTCTAGTGGTA	29	14.17	25	13.73	-0.0455081
ENSRNA049444660:1-20	GTTGCTGTGGTGTAGTGGTT	16	7.82	19	10.43	0.415499
ENSRNA049444783:1-18	GTTGAGATGGCCGAGTTG	102	49.83	71	38.99	-0.35391
ENSRNA049444804:1-25	GTCGTTGTAGTATAGTGGTAAGTAT	110	53.74	139	76.34	0.506443
ENSRNA049444804:34-55	GTCACGCGGGTGACCCGGGTTC	0	0.001	4	2.2	11.1033
ENSRNA049444804:55-70	CGATCCCCGGCAACGG	18	8.79	30	16.48	0.906781
ENSRNA049444814:1-21	GGTCCCGTAGCTCAGTTGGTT	43	21.01	24	13.18	-0.672726
ENSRNA049444827:1-26	GGTCCTATGGTCTAGTGGTCAGGACA	5	2.44	1	0.55	-2.14938
ENSRNA049444844:1-23	CCGACCTTAGCTCAGTTGGTAGA	4	1.95	8	4.39	1.17075
ENSRNA049444852:1-21	CCGACCTTAGCTCAGTTGGTA	15	7.33	9	4.94	-0.569302
ENSRNA049444855:1-21	CCGACCTTAGCTCAGTTGGTA	8	3.91	7	3.84	-0.0260623
ENSRNA049444862:1-20	GCACCAGTGGTCTAGTGGTA	29	14.17	29	15.93	0.168907
ENSRNA049444862:16-40	TGGTAGAATAGTACCCTGCCACGGT	1	0.49	4	2.2	2.16665
ENSRNA049444874:1-20	GCACCAGTGGTCTAGTGGTA	23	11.24	27	14.83	0.399877
ENSRNA049444908:1-28	GGGCATTTGGTCTAGTGGTATGATTCTC	1	0.49	14	7.69	3.97213
ENSRNA049444921:1-28	GGGCATTTGGTCTAGTGGTATGATTCTC	0	0.001	9	4.94	12.2703
ENSRNA049444943:1-28	GGGCATTTGGTCTAGTGGTATGATTCTC	2	0.98	14	7.69	2.97213
ENSRNA049444992:1-21	GGCCCATTAGCTCAGTTGGTT	11	5.37	10	5.49	0.0318841
ENSRNA049445077:1-23	GGTGTCGTGGTGTAGTTGGTTAT	1149	561.3	952	522.83	-0.10243
ENSRNA049445161:1-19	GCGCCCATGGCCTAATGGA	13	6.35	13	7.14	0.169167
ENSRNA049445161:31-55	ACTTCTAATCAAGCGATTGTGGGTT	3	1.47	6	3.3	1.16665
ENSRNA049445175:1-21	GTCGCTTTGGCCGAGTGGTTA	7	3.42	2	1.1	-1.63649
ENSRNA049445241:1-28	GGGCATTTGGTCTAGTGGTATGATTCTC	1	0.49	10	5.49	3.48595
ENSRNA049445264:1-19	GCGCCTGTAGCTCAGTGGA	152	74.25	106	58.21	-0.351124
ENSRNA049445264:38-57	AGCAGAAAGTCGTAGGTTCG	7	3.42	11	6.04	0.820552
ENSRNA049445274:1-23	CCGACCTTAGCTCAGTTGGTAGA	6	2.93	8	4.39	0.58332
ENSRNA049445284:1-21	GCTCTCGTAGCTCAGTTGGTT	9	4.4	7	3.84	-0.196397
ENSRNA049445395:1-21	GGTTTCGTGGTGTAGTTGGTT	70	34.2	61	33.5	-0.0298352
ENSRNA049445412:1-21	GGTTTCGTGGTGTAGTTGGTT	84	41.03	83	45.58	0.151722
ENSRNA049445440:39-55	GCGGGAGATTGTGGGTT	16	7.82	9	4.94	-0.662658
ENSRNA049445487:1-20	GCACCAGTGGTCTAGTGGTA	34	16.61	14	7.69	-1.111
ENSRNA049445487:19-41	TAGAATAGTACCCTGCCACGGTA	1	0.49	7	3.84	2.97025
ENSRNA049445550:1-21	GGTTTCGTGGTGTAGTTGGTT	70	34.2	60	32.95	-0.0537179
ENSRNA049445714:1-19	GTCAGGATGGCCGAGTGGT	97	47.39	65	35.7	-0.408659
ENSRNA049445714:30-51	AGACTCAAGTTCTGGTTCTCGT	0	0.001	5	2.75	11.4252
ENSRNA049445814:1-21	GTCTGGGTGGTGTAGTCGGTT	706	344.89	552	303.15	-0.186104
ENSRNA049445885:1-21	GTCTGGGTGGTGTAGTCGGTT	708	345.87	550	302.06	-0.195395
ENSRNA049445922:1-23	GGGGATGTAGCTCAAATGGTAGA	5180	2530.49	4402	2417.55	-0.065871
ENSRNA049445951:1-20	TCCTCAGTAGCTCAGTGGTA	160	78.16	81	44.48	-0.813274
ENSRNA049446002:1-21	CCGACCTTAGCTCAGTTGGTA	11	5.37	6	3.3	-0.702456
ENSRNA049446054:1-19	GTCAGGATGGCCGAGTGGT	61	29.8	36	19.77	-0.591999
ENSRNA049446054:47-68	TTCGTAAGAGGGCGTGGGTTCA	10	4.89	19	10.43	1.09283
ENSRNA049446068:39-55	GCGGGAGATTGTGGGTT	15	7.33	14	7.69	0.0691704
ENSRNA049446107:1-20	GCACCAGTGGTCTAGTGGTA	31	15.14	18	9.89	-0.614323
ENSRNA049446190:1-20	GCTGGAATAGCTCAGTTGGT	49	23.94	36	19.77	-0.27611
ENSRNA049446218:1-23	CCGACCTTAGCTCAGTTGGTAGA	5	2.44	9	4.94	1.01763
ENSRNA049446234:1-21	GTCTGGGTGGTGTAGTCGGTT	661	322.91	552	303.15	-0.0911003
ENSRNA049446294:30-51	GGCTTTCACCCAGGAGACCCGG	1	0.49	4	2.2	2.16665
ENSRNA049446394:1-22	GTTTGGGTGGTGTAGTCGGTTA	216	105.52	127	69.75	-0.597251
ENSRNA049446407:1-21	TGTCCCGTAGCTCAGTTGGTT	27	13.19	15	8.24	-0.678728
ENSRNA049446500:61-77	AGTTCGAATCTCTCAGG	4	1.95	5	2.75	0.495957
ENSRNA049446544:1-19	GATCACATAGCGGAGTGGA	129	63.02	62	34.05	-0.888155
ENSRNA049446633:1-26	GGTCCTATGGTCTAGCGGTTAGGACA	34	16.61	20	10.98	-0.597174
ENSRNA049446633:21-45	AGGACATTGGACTCTGAATCCAGTA	0	0.001	5	2.75	11.4252
ENSRNA049446713:1-20	GCCGTCTTAGCTCAGTGGTA	15	7.33	6	3.3	-1.15135
ENSRNA049446731:1-21	GCGCCCATGGCCTAATGGATA	11	5.37	10	5.49	0.0318841
ENSRNA049446731:31-54	ACTTCTAATCAGGCGATTGTGGGT	5	2.44	8	4.39	0.84734
ENSRNA049446752:29-50	GGCTGTTAACCGATTGGTCGTA	27	13.19	14	7.69	-0.778389
ENSRNA049446752:37-55	ACCGATTGGTCGTAGGTTC	8	3.91	3	1.65	-1.2447
ENSRNA049446797:12-32	CTAGTGGTTAGGACATTGGAC	6	2.93	0	0.001	-11.5167
ENSRNA049446797:1-26	GGTTCCATGGTCTAGTGGTTAGGACA	0	0.001	4	2.2	11.1033
ENSRNA049446813:1-21	GGCCCATTAGCTCAGTTGGTT	7	3.42	6	3.3	-0.0515303
ENSRNA049446837:1-21	CCGACCTTAGCTCAGTTGGTA	10	4.89	12	6.59	0.430444
ENSRNA049446954:1-20	GCTGGAATAGCTCAGTTGGT	62	30.29	40	21.97	-0.463307
ENSRNA049447024:1-20	GTCGATATGTCCGAGTGGTT	40	19.54	37	20.32	0.0564699
ENSRNA049447024:63-81	TTCGAATCCTGCTGTCGAC	5	2.44	2	1.1	-1.14938
ENSRNA049447069:1-20	GCCTCCGTAGCATAGTGGTA	13	6.35	15	8.24	0.375888
ENSRNA049447098:1-21	GTCAATATGTCCGAGTGGTTA	11	5.37	10	5.49	0.0318841
ENSRNA049447098:34-53	TGAAATCTGTTGGGCTTCGC	9	4.4	9	4.94	0.167008
ENSRNA049447135:30-50	AGATTTAGGCTCTGGTCCGAA	4	1.95	5	2.75	0.495957
ENSRNA049447135:47-64	CGAAAGGGCGTGGGTTCA	18	8.79	12	6.59	-0.415585
ENSRNA049447162:1-21	CCGACCTTAGCTCAGTTGGTA	8	3.91	10	5.49	0.489638
ENSRNA049447197:1-20	GCTCTCGTAGCTCAGTTGGT	13	6.35	9	4.94	-0.362246
ENSRNA049447240:1-21	GTGGACGTGCCGGAGTGGTTA	1115	544.69	813	446.49	-0.286808
ENSRNA049447284:1-21	GCCCGTCTAGCTCAGTTGGTA	8	3.91	16	8.79	1.16869
ENSRNA049447302:1-21	GTGGTCGTGCCGGAGTGGTTA	90	43.97	104	57.12	0.377476
ENSRNA049447371:1-23	GGGGATGTAGCTCAAATGGTAGA	5161	2521.21	4427	2431.28	-0.0524002
ENSRNA049447392:1-22	TCCGTTGTAGTCTAGTTGGTTA	65	31.75	66	36.25	0.191224
ENSRNA049447392:15-34	GTTGGTTAGGATACTCGGCT	18	8.79	15	8.24	-0.0932188
ENSRNA049447392:22-41	AGGATACTCGGCTCTCACCC	1	0.49	4	2.2	2.16665
ENSRNA049447405:1-20	GTTGCTGTGGTGTAGTGGTT	17	8.3	15	8.24	-0.010467
ENSRNA049447478:1-22	GGTTCTATGGTGTAGTGGTTAG	6	2.93	9	4.94	0.75361
ENSRNA049447550:1-19	GCGCCCATGGCCTAATGGA	12	5.86	8	4.39	-0.41668
ENSRNA049447550:21-41	AAGGCACTTGACTTCTAATCA	3	1.47	5	2.75	0.903615
ENSRNA049447550:32-55	CTTCTAATCAAGGGATTGTGGGTT	7	3.42	8	4.39	0.360225
ENSRNA049447684:1-21	GTGGTCGTGCCGGAGTGGTTA	96	46.9	105	57.67	0.298233
ENSRNA049447701:1-20	GTCGATATGTCCGAGTGGTT	36	17.59	31	17.03	-0.046677
ENSRNA049447701:34-51	TGAAATCTGTTGGGCTTC	26	12.7	17	9.34	-0.443334
ENSRNA049447784:1-22	TCCGTTGTAGTCTAGTTGGTTA	86	42.01	62	34.05	-0.303078
ENSRNA049447784:15-34	GTTGGTTAGGATACTCGGCT	19	9.28	20	10.98	0.242681
ENSRNA049447784:22-41	AGGATACTCGGCTCTCACCC	4	1.95	5	2.75	0.495957
ENSRNA049447846:1-19	GCCCCTATAGCTCAGTGGT	8	3.91	6	3.3	-0.244703
ENSRNA049447889:1-21	CCGACCATAGCTCAGTTGGTA	26	12.7	20	10.98	-0.20995
ENSRNA049447975:1-21	GTGGACGTGCCGGAGTGGTTA	1123	548.6	849	466.27	-0.234589
ENSRNA049447986:1-21	GGTCCTGTAGCTCAGTTGGTT	135	65.95	93	51.08	-0.368614
ENSRNA049448076:39-55	GCGGGAGATTGTGGGTT	18	8.79	5	2.75	-1.67643
ENSRNA049448104:1-20	GTCAAGATGGCCGAGTTGGT	15	7.33	17	9.34	0.349609
ENSRNA049448141:1-20	ATCAAAGTGGCGCAGCGGAA	5	2.44	0	0.001	-11.2527
ENSRNA049448141:15-36	GCGGAAGCGTGGTGGGCCCATA	3	1.47	8	4.39	1.5784
ENSRNA049448149:1-22	GCCCGTATAGCTCAGTGGTAGA	4	1.95	10	5.49	1.49333
ENSRNA049448149:45-66	GTCTGTAGTTCGATCCTGCATG	1	0.49	4	2.2	2.16665
ENSRNA049448195:1-20	TCCGTTGTAGTCTAGTTGGT	100	48.85	77	42.29	-0.208042
ENSRNA049448195:15-34	GTTGGTTAGGATACTCGGCT	13	6.35	12	6.59	0.0535219
ENSRNA049448224:1-26	GGTTCTATGGTCTAGCGGTTAGGACA	41	20.03	23	12.63	-0.665308
ENSRNA049448482:1-21	CCGACCTTAGCTCAGTTGGTA	11	5.37	5	2.75	-0.96549
ENSRNA049448498:1-22	CCGACCTTAGCTCAGTTGGTAG	5	2.44	9	4.94	1.01763
ENSRNA049448507:1-21	CCGACCTTAGCTCAGTTGGTA	11	5.37	10	5.49	0.0318841
ENSRNA049448516:1-21	CCGACCTTAGCTCAGTTGGTA	14	6.84	14	7.69	0.168987
ENSRNA049448526:1-24	CCGACCTTAGCTCAGTTGGTAGAG	3	1.47	4	2.2	0.581687
ENSRNA049448537:1-22	CCGACCTTAGCTCAGTTGGTAG	10	4.89	5	2.75	-0.830403
ENSRNA049448549:1-23	CCGACCTTAGCTCAGTTGGTAGA	6	2.93	3	1.65	-0.828435
ENSRNA049448572:1-23	CCGACCTTAGCTCAGTTGGTAGA	6	2.93	6	3.3	0.171565
ENSRNA049448638:1-20	TCCTCAGTAGCTCAGTGGTA	165	80.6	80	43.94	-0.875245
ENSRNA049448638:15-33	GTGGTAGAGCGGTCGGCTG	22	10.75	12	6.59	-0.705986
ENSRNA049448638:21-39	GAGCGGTCGGCTGTTAACC	14	6.84	8	4.39	-0.639775
ENSRNA049448638:29-50	GGCTGTTAACCGATTGGTCGTA	24	11.72	21	11.53	-0.0235801
ENSRNA049448674:1-22	CCGACCTTAGCTCAGTTGGTAG	7	3.42	4	2.2	-0.636493
ENSRNA049448708:1-21	GGTGGTTTGCCCGAGTGGTTA	6	2.93	0	0.001	-11.5167
ENSRNA049448722:1-21	GTCAATATGTCCGAGTGGTTA	14	6.84	7	3.84	-0.83289
ENSRNA049448722:63-78	TTCGAATCCTGCTGTT	9	4.4	12	6.59	0.582775
ENSRNA049448744:1-20	GACCGCATAGCGCAGTGGAT	93	45.43	68	37.35	-0.282537
ENSRNA049448839:1-21	GCTCTTGTAGCTCAGTTGGTT	58	28.33	40	21.97	-0.366796
ENSRNA049448881:1-21	GCACCCGTGGCCTAATGGATA	5	2.44	4	2.2	-0.149378
ENSRNA049448881:31-55	ACTTCTAATCAGGCGATTGTGGGTT	3	1.47	5	2.75	0.903615
ENSRNA049448944:1-22	GTTGGTGTGGTGTAGTGGTTAT	49	23.94	37	20.32	-0.236523
ENSRNA049448963:1-22	GTTGGTGTGGTGTAGTGGTTAT	57	27.85	48	26.36	-0.079327
ENSRNA049448963:14-34	AGTGGTTATCACGTCAGTCTT	2	0.98	6	3.3	1.75161
ENSRNA049449060:1-18	GCGGGGATAGCTCAGTTG	803	392.27	430	236.15	-0.732143
ENSRNA049449177:1-20	GACCGCATAGCGCAGTGGAT	88	42.99	67	36.8	-0.224295
ENSRNA049449177:39-56	ATCAAAAGGTCGTGGGTT	8	3.91	4	2.2	-0.829665

## Sheet: Table S3
Table S3 List of differentially expressed tRFs with a minimum 10 RPM value in one library
tRF ID	Sequence	C1D-counts	C1D-RPM	A1D-counts	A1D-RPM	fold-change(log2 A1D/C1D)
ENSRNA049443699:1-20	GGGGATGTAGCTCAGATGGT	61730	30155.8	44682	24539.1	-0.297355
ENSRNA049443502:1-18	GCGGGGATAGCTCAGTTG	771	376.64	380	208.69	-0.851825
ENSRNA049442922:1-17	TCCGTTATCGTCCAGCG	431	210.55	92	50.53	-2.05895
ENSRNA049449060:1-18	GCGGGGATAGCTCAGTTG	803	392.27	430	236.15	-0.732143
ENSRNA049443480:1-18	GCGGGGATAGCTCAGTTG	721	352.22	389	213.64	-0.721295
ENSRNA049447240:1-21	GTGGACGTGCCGGAGTGGTTA	1115	544.69	813	446.49	-0.286808
ENSRNA049448638:1-20	TCCTCAGTAGCTCAGTGGTA	165	80.6	80	43.94	-0.875245
ENSRNA049446394:1-22	GTTTGGGTGGTGTAGTCGGTTA	216	105.52	127	69.75	-0.597251
ENSRNA049445951:1-20	TCCTCAGTAGCTCAGTGGTA	160	78.16	81	44.48	-0.813274
ENSRNA049446544:1-19	GATCACATAGCGGAGTGGA	129	63.02	62	34.05	-0.888155
ENSRNA049441822:1-19	GCGCCTGTAGCTCAGTGGA	169	82.56	101	55.47	-0.573735
ENSRNA049445264:1-19	GCGCCTGTAGCTCAGTGGA	152	74.25	106	58.21	-0.351124
ENSRNA049447986:1-21	GGTCCTGTAGCTCAGTTGGTT	135	65.95	93	51.08	-0.368614
ENSRNA049443021:1-20	GACCGCATAGCGCAGTGGAT	102	49.83	64	35.15	-0.50349
ENSRNA049444052:1-20	GACCGCATAGCGCAGTGGAT	110	53.74	74	40.64	-0.403096
ENSRNA049445714:1-19	GTCAGGATGGCCGAGTGGT	97	47.39	65	35.7	-0.408659
ENSRNA049444627:39-54	GCAGAAGGTCGTAGGT	43	21.01	18	9.89	-1.08703
ENSRNA049444783:1-18	GTTGAGATGGCCGAGTTG	102	49.83	71	38.99	-0.35391
ENSRNA049446054:1-19	GTCAGGATGGCCGAGTGGT	61	29.8	36	19.77	-0.591999
ENSRNA049441822:39-55	GCAGAAGGTCGTAGGTT	36	17.59	15	8.24	-1.09404
ENSRNA049442243:1-20	TTCGTTATCGTCCAGCGGTT	70	34.2	46	25.26	-0.437142
ENSRNA049445487:1-20	GCACCAGTGGTCTAGTGGTA	34	16.61	14	7.69	-1.111
ENSRNA049442319:34-51	TGAAATCTGTTGGGCTTC	34	16.61	15	8.24	-1.01134
ENSRNA049446954:1-20	GCTGGAATAGCTCAGTTGGT	62	30.29	40	21.97	-0.463307
ENSRNA049448744:1-20	GACCGCATAGCGCAGTGGAT	93	45.43	68	37.35	-0.282537
ENSRNA049447784:1-22	TCCGTTGTAGTCTAGTTGGTTA	86	42.01	62	34.05	-0.303078
ENSRNA049444814:1-21	GGTCCCGTAGCTCAGTTGGTT	43	21.01	24	13.18	-0.672726
ENSRNA049448224:1-26	GGTTCTATGGTCTAGCGGTTAGGACA	41	20.03	23	12.63	-0.665308
ENSRNA049448839:1-21	GCTCTTGTAGCTCAGTTGGTT	58	28.33	40	21.97	-0.366796
ENSRNA049441992:1-20	GCTGGAATAGCTCAGTTGGT	55	26.87	38	20.87	-0.364566
ENSRNA049446633:1-26	GGTCCTATGGTCTAGCGGTTAGGACA	34	16.61	20	10.98	-0.597174
ENSRNA049442587:1-19	GACAGTTTGGCCGAGTGGT	52	25.4	36	19.77	-0.361516
ENSRNA049446752:29-50	GGCTGTTAACCGATTGGTCGTA	27	13.19	14	7.69	-0.778389
ENSRNA049446107:1-20	GCACCAGTGGTCTAGTGGTA	31	15.14	18	9.89	-0.614323
ENSRNA049446407:1-21	TGTCCCGTAGCTCAGTTGGTT	27	13.19	15	8.24	-0.678728
ENSRNA049444627:1-19	GCGTCTGTAGCTCAGTGGA	45	21.98	31	17.03	-0.368113
ENSRNA049443263:1-23	GGTTTCGTGGTGTAGTTGGTTAT	39	19.05	26	14.28	-0.415795
ENSRNA049442689:1-21	ATCAGAGTGGCGCAGCGGAAG	22	10.75	11	6.04	-0.831716
ENSRNA049446190:1-20	GCTGGAATAGCTCAGTTGGT	49	23.94	36	19.77	-0.27611
ENSRNA049448638:15-33	GTGGTAGAGCGGTCGGCTG	22	10.75	12	6.59	-0.705986
ENSRNA049447701:34-51	TGAAATCTGTTGGGCTTC	26	12.7	17	9.34	-0.443334
ENSRNA049444660:1-20	GTTGCTGTGGTGTAGTGGTT	16	7.82	19	10.43	0.415499
ENSRNA049444874:1-20	GCACCAGTGGTCTAGTGGTA	23	11.24	27	14.83	0.399877
ENSRNA049444804:55-70	CGATCCCCGGCAACGG	18	8.79	30	16.48	0.906781
ENSRNA049442622:1-25	GGGTCCATAGCTCAGTGGTAGAGCA	38	18.56	48	26.36	0.506154
ENSRNA049447684:1-21	GTGGTCGTGCCGGAGTGGTTA	96	46.9	105	57.67	0.298233
ENSRNA049447302:1-21	GTGGTCGTGCCGGAGTGGTTA	90	43.97	104	57.12	0.377476
ENSRNA049442379:1-25	GTCGTTGTAGTATAGTGGTAAGTAT	105	51.29	120	65.9	0.361601
ENSRNA049441652:1-25	GTCGTTGTAGTATAGTGGTAAGTAT	96	46.9	116	63.71	0.441932
ENSRNA049444804:1-25	GTCGTTGTAGTATAGTGGTAAGTAT	110	53.74	139	76.34	0.506443
ENSRNA049444342:1-23	GGTGTCGTAGTGTAGTTGGTTAT	766	374.2	823	451.99	0.272481

## Sheet: Table S4
Table S4 List of phasiRNAs identified in this study and their expression levels
phasiRNA ID	Sequence	PHAS loci	C1D-counts	C1D-RPM	A1D-counts	A1D-RPM	fold-change(log2 A1D/C1D)	p value
1_1364_186(+)	AAGACGTAAGAGATAACACGG	Solyc01g058100.2.1;	126	61.55	270	148.28	1.26849	7.14e-18
1_1364_205(-)	TTCTTGACCTTGTAAGACCCC	Solyc01g058100.2.1;	211	103.08	436	239.45	1.21596	3.07e-26
1_1364_226(-)	TTCTTGACCTTGTAAGACCTT	Solyc01g058100.2.1;	52	25.4	118	64.8	1.35117	2.43e-09
1_1364_249(+)	ATGGGGTAGGTAGAGGAACGA	Solyc01g058100.2.1;	152	74.25	318	174.64	1.23392	5.63e-20
1_276_220(+)	TCAGGATGAACGCTGGCGGCA	Solyc01g007690.2.1;Solyc01g007700.2.1;	29	14.17	10	5.49	-1.36796	0.00809114
1_276_577(+)	GCGTGGAGGTAGAAGGCCCAC	Solyc01g007690.2.1;Solyc01g007700.2.1;	22	10.75	3	1.65	-2.7038	0.000317128
1_276_724(+)	AAAGCGTCTGTAGGTGGCTTT	Solyc01g007690.2.1;Solyc01g007700.2.1;	307	149.97	195	107.09	-0.48585	0.00039885
1_3182_143(+)	TCCAGAGGCTTTGGACGGATG	Noncoding	439	214.46	440	241.65	0.17221	0.0463222
1_3183_303(+)	TCATAAAAAGCAGTCGTGTCG	Solyc01g097890.2.1;	107	52.27	107	58.76	0.168851	0.332534
1_3183_324(+)	TAATGGTGCTGCGGGGAAGAC	Solyc01g097890.2.1;	46	22.47	53	29.11	0.373515	0.173378
1_541_113(-)	ATCCATCCCATGTACATCAAT	Solyc01g009570.2.1;	292	142.65	217	119.18	-0.259338	0.0659141
1_541_115(+)	TGATGTACATGGGATGGATTA	Solyc01g009570.2.1;	2899	1416.19	2926	1606.94	0.182301	6.95e-08
1_541_134(-)	ATGTTTTCTAATCAAGTTGTA	Solyc01g009570.2.1;	186	90.86	170	93.36	0.0391593	0.688549
1_541_136(+)	CAACTTGATTAGAAAACATTG	Solyc01g009570.2.1;	84	41.03	44	24.16	-0.764059	0.00503234
1_541_155(-)	AGTTTTGAAGTATTGTGTCCA	Solyc01g009570.2.1;	88	42.99	86	47.23	0.135702	0.469497
1_541_178(+)	CCAAAAACGGTCTTATGGAAT	Solyc01g009570.2.1;	1105	539.81	800	439.36	-0.297048	3.67e-05
1_541_197(-)	TACAACAATCTCTACTCGCAT	Solyc01g009570.2.1;	1091	532.97	958	526.13	-0.018635	0.961253
1_541_239(-)	CATAGGTATAGAAGATGAGAT	Solyc01g009570.2.1;	1734	847.08	1369	751.85	-0.172053	0.00388347
1_541_470(-)	TGTCAAAGATCTTGGAGGTTA	Solyc01g009570.2.1;	113	55.2	78	42.84	-0.36571	0.105341
1_541_619(+)	CATTTGTAACATGAGCTGGCT	Solyc01g009570.2.1;	50	24.43	52	28.56	0.225342	0.385112
1_541_94(+)	TTATGGAATACGAGTAGATAT	Solyc01g009570.2.1;	91898	44893.2	85329	46862.2	0.0619256	4.24e-34
10_1305_229(+)	ACAGAGGTCTGAAGGGTAGGA	Solyc10g051050.1.1;	145	70.83	215	118.08	0.737332	7.52e-07
10_1305_271(+)	ATATTTGGAGTACTGAGGCAT	Solyc10g051050.1.1;	309	150.95	357	196.06	0.377224	0.000364537
10_1305_332(-)	GTAGTTAATAGAATTCGGCTT	Solyc10g051050.1.1;	413	201.76	518	284.48	0.495687	4.83e-08
10_1305_395(-)	AAAGACTTACTATGAGGCGGA	Solyc10g051050.1.1;	40	19.54	36	19.77	0.0168824	0.900221
10_1305_418(+)	TAAGTCGAGATGATAGTTGGA	Solyc10g051050.1.1;	67	32.73	91	49.98	0.610737	0.00616783
10_1305_481(+)	CTTTACTTGTAGAAATAGGGA	Solyc10g051050.1.1;	42	20.52	52	28.56	0.476965	0.0947469
11_127_91(+)	AAATCAGGGCAGTTGACATAA	Solyc11g006520.1.1;	319	155.84	345	189.47	0.281904	0.00670272
11_131_361(+)	TCAAGAAGCATTTGTCTCTGA	Solyc11g006530.1.1;	88	42.99	115	63.16	0.55501	0.0045733
11_142_4505(+)	ATATTTGGAGTACTGAGGCAT	Solyc11g006640.1.1;	289	141.18	328	180.14	0.351583	0.00132372
11_142_4566(-)	GTAGTTAATAGAATTCGGCTT	Solyc11g006640.1.1;	447	218.36	522	286.68	0.392733	7.99e-06
11_1518_166(+)	AAGGAGAAAGGTGGATGAAAT	Noncoding	2801	1368.32	530	291.07	-2.23297	0
11_1518_229(+)	CGATGATGTTTGTTGCTGGCT	Noncoding	149	72.79	68	37.35	-0.962632	4.47e-06
11_1518_250(+)	TCACTGTGTGAGATGGTAATA	Noncoding	4166	2035.14	2547	1398.8	-0.540938	1.6e-47
11_1518_271(+)	ACGGTGATAATGGTATTCTAA	Noncoding	3878	1894.45	2938	1613.53	-0.231559	2.44e-09
11_2273_1539(+)	TGGGAAGTAAGATCATCGTAA	Solyc11g068360.1.1;	42	20.52	61	33.5	0.70713	0.0110723
11_2273_1686(+)	TCCGGAACTTGAAGAGGTTGG	Solyc11g068360.1.1;	97	47.39	111	60.96	0.36328	0.0543791
11_2435_868(+)	TCCGGAACTTGAAGAGGTTGG	Solyc11g069620.1.1;	102	49.83	111	60.96	0.290848	0.113666
11_2515_1274(+)	TCCGGAACTTGAAGAGGTCGG	Solyc11g071410.1.1;	118	57.64	110	60.41	0.0677171	0.637502
11_2522_1482(+)	AGGAGATATAGGAAGTAAGAT	Solyc11g071430.1.1;	399	194.92	295	162.01	-0.266799	0.0267081
11_874_165(+)	TACTGCAACAACTAGAGACAA	Solyc11g013770.1.1;	3983	1945.74	3339	1833.76	-0.0855141	0.0590516
11_874_543(+)	AAACTAGGTTGTTCCGGAGCA	Solyc11g013770.1.1;	100	48.85	59	32.4	-0.592365	0.0152104
11_874_79(-)	TTAATATCAGCAAGAAAACAA	Solyc11g013770.1.1;	83	40.55	81	44.48	0.133455	0.48799
12_434_1052(+)	GATGATGAAGTTGGATGAGGC	Solyc12g009520.1.1;	53	25.89	52	28.56	0.141601	0.559135
12_434_1092(-)	AGTTGTAGTCGGCTTAATGGA	Solyc12g009520.1.1;	84	41.03	50	27.46	-0.579348	0.0294784
12_434_1155(-)	TGCTGCACTTGGGACGGGGTC	Solyc12g009520.1.1;	79	38.59	68	37.35	-0.0471188	0.920034
12_434_1176(-)	TCATGGAATGAGAGTAACGAT	Solyc12g009520.1.1;	111	54.22	91	49.98	-0.117474	0.642721
12_85_97(-)	TAAGAAGAACAAGCTCAGAAA	Noncoding	63	30.78	79	43.39	0.495369	0.0332538
12_98_449(+)	AAACAAGACATAACGAACGGG	Solyc12g006040.1.1;	343	167.56	317	174.09	0.0551555	0.492789
2_526_102(+)	GAGAAAATAAGAGTAAGGGCG	Solyc02g036270.2.1;	1421	694.17	1216	667.82	-0.0558297	0.544727
2_526_142(-)	CAGTGACCATGACAACTTCAT	Solyc02g036270.2.1;	282	137.76	261	143.34	0.0572842	0.52253
2_526_144(+)	GAAGTTGTCATGGTCACTGTC	Solyc02g036270.2.1;	242	118.22	281	154.32	0.384451	0.00130029
2_526_163(-)	TCAAGTCTGGTTGTTGACTGA	Solyc02g036270.2.1;	129	63.02	116	63.71	0.0157101	0.83595
2_526_226(-)	TCCAGAAATTGTCGCCTTGGA	Solyc02g036270.2.1;	809	395.21	804	441.55	0.159957	0.0114768
2_526_247(-)	AACGCAACTGATCTCCACGAT	Solyc02g036270.2.1;	1249	610.15	1276	700.77	0.199777	0.000115585
2_526_249(+)	CGTGGAGATCAGTTGCGTTCA	Solyc02g036270.2.1;	49	23.94	52	28.56	0.254573	0.334453
2_526_270(+)	AGGTTAATGGGTCAGGACAGC	Solyc02g036270.2.1;	295	144.11	181	99.4	-0.535853	0.000138636
2_526_331(-)	TAGGAATTCCAAGTTTGTTCA	Solyc02g036270.2.1;	40	19.54	48	26.36	0.43192	0.140983
2_526_394(-)	CACAAACATCTCGGAGTCGCG	Solyc02g036270.2.1;	110	53.74	50	27.46	-0.968665	7.6e-05
2_526_438(+)	ATAGAAGTTGGAATCTTACCT	Solyc02g036270.2.1;	66	32.24	67	36.8	0.190854	0.394265
2_526_541(-)	ACCCCTTGCATTCTTTCACAA	Solyc02g036270.2.1;	64	31.26	42	23.07	-0.4383	0.146634
2_526_625(-)	TTTGTAATTGTTTAAGGGCAT	Solyc02g036270.2.1;	66	32.24	71	38.99	0.274252	0.229235
2_526_774(+)	AGTAATATCTGGCATGAACAA	Solyc02g036270.2.1;	121	59.11	96	52.72	-0.165052	0.471299
2_526_81(+)	GTAGGTAAGACGACACTAGCT	Solyc02g036270.2.1;	2409	1176.82	1938	1064.34	-0.144935	0.00505086
4_44_165(+)	AGAATTCAGGATGAGATTGCA	Solyc04g005540.2.1;	4763	2326.78	3711	2038.06	-0.191138	7.58e-08
4_44_226(-)	TACGCAGCAGATCTCCACGAC	Solyc04g005540.2.1;	8344	4076.14	8016	4402.34	0.111067	4.16e-09
4_44_268(-)	CCAAGATTATAAGGATGCGAC	Solyc04g005540.2.1;	332	162.19	352	193.32	0.253306	0.0126829
4_44_373(-)	AAACATGTCGGAAACGCGTTG	Solyc04g005540.2.1;	235	114.8	236	129.61	0.175054	0.138634
4_44_438(+)	TCTGAAGAGGAAGCATGGATC	Solyc04g005540.2.1;	386	188.57	309	169.7	-0.152114	0.237177
4_44_81(+)	GAGAAAATCAGACAAATGGCG	Solyc04g005540.2.1;	631	308.25	497	272.95	-0.175464	0.0753979
4_47_1305(-)	CAAACATGTCGGAAACGCGTT	Solyc04g005550.1.1;	322	157.3	363	199.36	0.341857	0.000983336
5_2025_10469(+)	CTATGAGATAAGTTCAACGTG	Noncoding	2992	1461.63	2718	1492.71	0.0303558	0.173823
5_2025_10490(+)	TGAATTGCCATAAGATCTCCC	Noncoding	170	83.05	127	69.75	-0.251787	0.17478
5_2025_10511(+)	ATAATGCTTGGAATATGCCCT	Noncoding	834	407.42	626	343.8	-0.244947	0.00335239
5_28_180(+)	CTTCGGAGTGTTAAGAAGGAT	Solyc05g005330.2.1;	67	32.73	84	46.13	0.495092	0.0282084
5_28_325(-)	TGGCATCATAGAAGCATGGCA	Solyc05g005330.2.1;	182	88.91	161	88.42	-0.00797296	0.926635
5_28_495(+)	CCTGTAGTCTTAGAAGATGTT	Solyc05g005330.2.1;	467	228.13	370	203.2	-0.166956	0.148134
5_328_208(+)	TCAACAATCAAGAAATGAGCA	Solyc05g008070.2.1;	722	352.71	573	314.69	-0.164551	0.0766405
5_328_250(+)	TGTATAGAAGTCTCAAGGGTA	Solyc05g008070.2.1;	115	56.18	85	46.68	-0.267252	0.236173
5_328_313(+)	CTTGGGACCAAATGCGAAGAA	Solyc05g008070.2.1;	813	397.16	703	386.08	-0.0408205	0.797916
5_328_355(+)	AAAGCCGAATTATACTAACCA	Solyc05g008070.2.1;	95	46.41	78	42.84	-0.115477	0.675691
5_328_395(-)	TCAGGGGAGCTTGCATAATCA	Solyc05g008070.2.1;	839	409.86	736	404.21	-0.0200262	0.981062
5_328_481(+)	TATTCAGAAAAGATCGTTGTC	Solyc05g008070.2.1;	2965	1448.44	2723	1495.45	0.0460798	0.0770232
5_328_586(+)	TTAGCAAGATAGACGTGACGT	Solyc05g008070.2.1;	488	238.39	413	226.82	-0.0717759	0.604846
5_328_668(-)	AAACACAGAATTGCTTGGCAT	Solyc05g008070.2.1;	87	42.5	55	30.21	-0.492437	0.0575229
6_1497_376(+)	TATGAAAACAGGGCACTGTAA	Solyc06g054600.2.1;	57	27.85	43	23.62	-0.237668	0.464986
6_1497_416(-)	AGCTGGCTGTGGATGGTTAAA	Solyc06g054600.2.1;	6164	3011.18	3331	1829.36	-0.71899	2.83e-116
6_1497_500(-)	TTGCAGTTCTGGATAAGTGGC	Solyc06g054600.2.1;	3333	1628.21	2164	1188.46	-0.454193	6.25e-28
6_1500_266(+)	CAAAGGAAAAGGTCCAGCTGC	Solyc06g054620.2.1;	77	37.62	56	30.75	-0.290913	0.292155
6_1500_369(-)	TGAAAAGGAATGCGCACACTA	Solyc06g054620.2.1;	904	441.61	638	350.39	-0.333811	2.62e-05
6_1500_390(-)	TTCATTGAGTTCGTCACAGAA	Solyc06g054620.2.1;	129	63.02	110	60.41	-0.0610224	0.838392
6_1500_453(-)	TTTTTAATTCTTTTGTTGGTC	Solyc06g054620.2.1;	252	123.1	205	112.58	-0.12888	0.431695
6_61_162(-)	ACAAGGAAATATGATCTGGAG	Solyc06g005410.2.1;	64	31.26	70	38.44	0.298291	0.198929
6_61_521(+)	TGGCTGCAAGTGTGTTGGGAG	Solyc06g005410.2.1;	94	45.92	88	48.33	0.0737964	0.652295
6_61_561(-)	TAAGACAAAGTGGGAAAGCAA	Solyc06g005410.2.1;	1339	654.12	1184	650.25	-0.00856083	0.81936
6_62_100(-)	ATAAGGAGACGATTGCAACTT	Noncoding	2743	1339.99	2234	1226.9	-0.127205	0.0101828
6_62_142(-)	TATTGGGAGAAGTAGTGATGA	Noncoding	475	232.04	433	237.8	0.0353752	0.550715
6_62_163(-)	TTTTAAAGAAAGAAGAGTTGA	Noncoding	131	63.99	106	58.21	-0.136579	0.546151
6_62_226(-)	TGTGGCCTTAGAGCAAAGACT	Noncoding	239	116.75	236	129.61	0.150754	0.192443
6_62_228(+)	TCTTTGCTCTAAGGCCACATA	Noncoding	49	23.94	47	25.81	0.108507	0.653573
6_62_249(+)	TCAAATGTTTGTGTTGGATTG	Noncoding	2408	1176.34	2192	1203.83	0.0333266	0.196762
6_62_312(+)	TTGTTAAGGACTCTAATCGGC	Noncoding	12466	6089.78	10495	5763.79	-0.0793723	0.00250073
6_62_375(+)	TCTTGAGAATTTGATGAAGAA	Noncoding	280	136.78	238	130.71	-0.0654878	0.732905
7_1754_111(-)	AAAGTGACAAAGTTGTTACAA	Noncoding	53	25.89	50	27.46	0.0849367	0.703438
7_1754_134(+)	GGGTAACATGAGAAGACCTCG	Noncoding	326	159.25	568	311.94	0.969975	5.25e-24
7_1754_195(-)	TTCCCTTCTTATCTTTTCTAA	Noncoding	88	42.99	110	60.41	0.490786	0.0126867
7_1754_218(+)	TAAGAAGAATAAGCTCAGGAG	Noncoding	98	47.87	97	53.27	0.154201	0.393165
7_1754_92(+)	GATAGAAAAGAGACGAGAATT	Noncoding	59	28.82	64	35.15	0.286454	0.235871
8_2183_233(+)	CCTCATGTCGAGGACTTGGCT	Solyc08g076000.2.1;	84	41.03	73	40.09	-0.0334367	0.96442
8_2183_86(+)	CTAGGAAAGACGACACTTGCC	Solyc08g076000.2.1;	3943	1926.2	3236	1777.19	-0.11616	0.00570325
8_2337_1076(-)	TCTAGGTGGAGATCTTTCGAG	Solyc08g077190.1.1;	182	88.91	282	154.87	0.80064	1.24e-09
8_2337_173(-)	TTTTTGTCCAAAAAGAATCCA	Solyc08g077190.1.1;	124	60.58	109	59.86	-0.0172493	0.97641
8_2337_238(+)	ACATATTTCAGAGTAATGCAA	Solyc08g077190.1.1;	53	25.89	62	34.05	0.39526	0.121654
8_2337_259(+)	TGGTTTGGTCGATTGCACGAG	Solyc08g077190.1.1;	365	178.31	429	235.6	0.401952	3.59e-05
8_2337_301(+)	GATAAGCGGGAAGATATGATT	Solyc08g077190.1.1;	206	100.63	90	49.43	-1.0256	1.21e-08
8_2337_322(+)	TTTGGAAGGTGGAGAAGCCAG	Solyc08g077190.1.1;	3261	1593.04	3002	1648.68	0.0495289	0.0512027
8_2337_341(-)	ACAAAGCAAAAATAGGTACCT	Solyc08g077190.1.1;	55	26.87	59	32.4	0.269997	0.279142
8_2337_383(-)	TTACCCACCTTGTCAAGTATT	Solyc08g077190.1.1;	80	39.08	66	36.25	-0.108449	0.723153
8_2337_406(+)	TGGTAGAAATTGAAAGATGGT	Solyc08g077190.1.1;	37939	18533.6	32967	18105.3	-0.0337366	0.264405
8_2337_616(+)	TATGTTAAAGCGAAGATAGGA	Solyc08g077190.1.1;	79	38.59	58	31.85	-0.276934	0.309951
8_2915_331(+)	TTTGAAAAAGAGGATTCCGGG	Noncoding	1688	824.61	1834	1007.22	0.288595	1.79e-10
8_2915_394(+)	AGAGTCGGAGAAGAGGTGAAA	Noncoding	72	35.17	48	26.36	-0.415995	0.143434
8_303_452(+)	AGGAGATATAGGAAGTAAGAT	Solyc08g007630.1.1;	384	187.59	291	159.82	-0.231135	0.0615825
8_773_223(-)	TTCTGATCACTCAAGTAGACA	Noncoding	487	237.91	465	255.38	0.10223	0.185059
8_773_246(+)	AGAAATGAACGGAGATCGGCT	Noncoding	701	342.45	675	370.71	0.114398	0.0802958
9_1024_157(+)	TCAGGATGAACGCTGGCGGCA	Noncoding	31	15.14	11	6.04	-1.32574	0.00742248
9_1348_8044(+)	TTCCGATGGCCACAAGATTTA	Solyc09g064610.2.1;	104	50.81	100	54.92	0.112219	0.504853
9_1348_8105(-)	TCAACATGATGGTTTACTGTT	Solyc09g064610.2.1;	104	50.81	112	61.51	0.275709	0.129388
9_1348_8147(-)	TCAATTATGGGAACGTTAGTA	Solyc09g064610.2.1;	876	427.94	818	449.24	0.0700779	0.190728
9_1348_8170(+)	CAACCTTTTCAAGACGAGTAG	Solyc09g064610.2.1;	40	19.54	35	19.22	-0.0238221	0.996938
9_1348_8191(+)	TTGCTAGAACAGAAGCACCTC	Solyc09g064610.2.1;	101	49.34	89	48.88	-0.0135134	0.964377
9_1348_8212(+)	TTGCTCCAACCTTCAAGACTG	Solyc09g064610.2.1;	58	28.33	38	20.87	-0.4409	0.165298
9_1348_8357(-)	AGGTTGTTGAAAGAAGGGTCT	Solyc09g064610.2.1;	170	83.05	209	114.78	0.466819	0.00100476
9_1348_8441(-)	CAAATGATCTTCAATGATGAG	Solyc09g064610.2.1;	103	50.32	117	64.26	0.352789	0.0543381
9_1348_8443(+)	CATCATTGAAGATCATTTGGG	Solyc09g064610.2.1;	520	254.03	348	191.12	-0.41052	9.02e-05
9_1750_102(+)	TCAGTAAGTTTTGAAGCATGT	Solyc09g074520.2.1;	187	91.35	254	139.5	0.610788	4.66e-06
9_1750_81(+)	TCCCTTTGGATGTCTTCTTGT	Solyc09g074520.2.1;	34	16.61	56	30.75	0.888534	0.00323281

## Sheet: Table S5
Table S5 The differential expression levels in the control (C1D) and ABA-treatment (A1D) libraries of phasiRNAs
phasiRNA ID	Sequence	C1D-counts	C1D-RPM	A1D-counts	A1D-RPM	fold-change(log2 A1D/C1D)
1_1364_186(+)	AAGACGTAAGAGATAACACGG	126	61.55	270	148.28	1.26849
1_1364_205(-)	TTCTTGACCTTGTAAGACCCC	211	103.08	436	239.45	1.21596
1_1364_226(-)	TTCTTGACCTTGTAAGACCTT	52	25.4	118	64.8	1.35117
1_1364_249(+)	ATGGGGTAGGTAGAGGAACGA	152	74.25	318	174.64	1.23392
1_276_220(+)	TCAGGATGAACGCTGGCGGCA	29	14.17	10	5.49	-1.36796
1_276_577(+)	GCGTGGAGGTAGAAGGCCCAC	22	10.75	3	1.65	-2.7038
1_276_724(+)	AAAGCGTCTGTAGGTGGCTTT	307	149.97	195	107.09	-0.48585
1_3182_143(+)	TCCAGAGGCTTTGGACGGATG	439	214.46	440	241.65	0.17221
1_3183_303(+)	TCATAAAAAGCAGTCGTGTCG	107	52.27	107	58.76	0.168851
1_3183_324(+)	TAATGGTGCTGCGGGGAAGAC	46	22.47	53	29.11	0.373515
1_541_113(-)	ATCCATCCCATGTACATCAAT	292	142.65	217	119.18	-0.259338
1_541_115(+)	TGATGTACATGGGATGGATTA	2899	1416.19	2926	1606.94	0.182301
1_541_134(-)	ATGTTTTCTAATCAAGTTGTA	186	90.86	170	93.36	0.0391593
1_541_136(+)	CAACTTGATTAGAAAACATTG	84	41.03	44	24.16	-0.764059
1_541_155(-)	AGTTTTGAAGTATTGTGTCCA	88	42.99	86	47.23	0.135702
1_541_178(+)	CCAAAAACGGTCTTATGGAAT	1105	539.81	800	439.36	-0.297048
1_541_197(-)	TACAACAATCTCTACTCGCAT	1091	532.97	958	526.13	-0.018635
1_541_239(-)	CATAGGTATAGAAGATGAGAT	1734	847.08	1369	751.85	-0.172053
1_541_470(-)	TGTCAAAGATCTTGGAGGTTA	113	55.2	78	42.84	-0.36571
1_541_619(+)	CATTTGTAACATGAGCTGGCT	50	24.43	52	28.56	0.225342
1_541_94(+)	TTATGGAATACGAGTAGATAT	91898	44893.2	85329	46862.2	0.0619256
10_1305_229(+)	ACAGAGGTCTGAAGGGTAGGA	145	70.83	215	118.08	0.737332
10_1305_271(+)	ATATTTGGAGTACTGAGGCAT	309	150.95	357	196.06	0.377224
10_1305_332(-)	GTAGTTAATAGAATTCGGCTT	413	201.76	518	284.48	0.495687
10_1305_395(-)	AAAGACTTACTATGAGGCGGA	40	19.54	36	19.77	0.0168824
10_1305_418(+)	TAAGTCGAGATGATAGTTGGA	67	32.73	91	49.98	0.610737
10_1305_481(+)	CTTTACTTGTAGAAATAGGGA	42	20.52	52	28.56	0.476965
11_127_91(+)	AAATCAGGGCAGTTGACATAA	319	155.84	345	189.47	0.281904
11_131_361(+)	TCAAGAAGCATTTGTCTCTGA	88	42.99	115	63.16	0.55501
11_142_4505(+)	ATATTTGGAGTACTGAGGCAT	289	141.18	328	180.14	0.351583
11_142_4566(-)	GTAGTTAATAGAATTCGGCTT	447	218.36	522	286.68	0.392733
11_1518_166(+)	AAGGAGAAAGGTGGATGAAAT	2801	1368.32	530	291.07	-2.23297
11_1518_229(+)	CGATGATGTTTGTTGCTGGCT	149	72.79	68	37.35	-0.962632
11_1518_250(+)	TCACTGTGTGAGATGGTAATA	4166	2035.14	2547	1398.8	-0.540938
11_1518_271(+)	ACGGTGATAATGGTATTCTAA	3878	1894.45	2938	1613.53	-0.231559
11_2273_1539(+)	TGGGAAGTAAGATCATCGTAA	42	20.52	61	33.5	0.70713
11_2273_1686(+)	TCCGGAACTTGAAGAGGTTGG	97	47.39	111	60.96	0.36328
11_2435_868(+)	TCCGGAACTTGAAGAGGTTGG	102	49.83	111	60.96	0.290848
11_2515_1274(+)	TCCGGAACTTGAAGAGGTCGG	118	57.64	110	60.41	0.0677171
11_2522_1482(+)	AGGAGATATAGGAAGTAAGAT	399	194.92	295	162.01	-0.266799
11_874_165(+)	TACTGCAACAACTAGAGACAA	3983	1945.74	3339	1833.76	-0.0855141
11_874_543(+)	AAACTAGGTTGTTCCGGAGCA	100	48.85	59	32.4	-0.592365
11_874_79(-)	TTAATATCAGCAAGAAAACAA	83	40.55	81	44.48	0.133455
12_434_1052(+)	GATGATGAAGTTGGATGAGGC	53	25.89	52	28.56	0.141601
12_434_1092(-)	AGTTGTAGTCGGCTTAATGGA	84	41.03	50	27.46	-0.579348
12_434_1155(-)	TGCTGCACTTGGGACGGGGTC	79	38.59	68	37.35	-0.0471188
12_434_1176(-)	TCATGGAATGAGAGTAACGAT	111	54.22	91	49.98	-0.117474
12_85_97(-)	TAAGAAGAACAAGCTCAGAAA	63	30.78	79	43.39	0.495369
12_98_449(+)	AAACAAGACATAACGAACGGG	343	167.56	317	174.09	0.0551555
2_526_102(+)	GAGAAAATAAGAGTAAGGGCG	1421	694.17	1216	667.82	-0.0558297
2_526_142(-)	CAGTGACCATGACAACTTCAT	282	137.76	261	143.34	0.0572842
2_526_144(+)	GAAGTTGTCATGGTCACTGTC	242	118.22	281	154.32	0.384451
2_526_163(-)	TCAAGTCTGGTTGTTGACTGA	129	63.02	116	63.71	0.0157101
2_526_226(-)	TCCAGAAATTGTCGCCTTGGA	809	395.21	804	441.55	0.159957
2_526_247(-)	AACGCAACTGATCTCCACGAT	1249	610.15	1276	700.77	0.199777
2_526_249(+)	CGTGGAGATCAGTTGCGTTCA	49	23.94	52	28.56	0.254573
2_526_270(+)	AGGTTAATGGGTCAGGACAGC	295	144.11	181	99.4	-0.535853
2_526_331(-)	TAGGAATTCCAAGTTTGTTCA	40	19.54	48	26.36	0.43192
2_526_394(-)	CACAAACATCTCGGAGTCGCG	110	53.74	50	27.46	-0.968665
2_526_438(+)	ATAGAAGTTGGAATCTTACCT	66	32.24	67	36.8	0.190854
2_526_541(-)	ACCCCTTGCATTCTTTCACAA	64	31.26	42	23.07	-0.4383
2_526_625(-)	TTTGTAATTGTTTAAGGGCAT	66	32.24	71	38.99	0.274252
2_526_774(+)	AGTAATATCTGGCATGAACAA	121	59.11	96	52.72	-0.165052
2_526_81(+)	GTAGGTAAGACGACACTAGCT	2409	1176.82	1938	1064.34	-0.144935
4_44_165(+)	AGAATTCAGGATGAGATTGCA	4763	2326.78	3711	2038.06	-0.191138
4_44_226(-)	TACGCAGCAGATCTCCACGAC	8344	4076.14	8016	4402.34	0.111067
4_44_268(-)	CCAAGATTATAAGGATGCGAC	332	162.19	352	193.32	0.253306
4_44_373(-)	AAACATGTCGGAAACGCGTTG	235	114.8	236	129.61	0.175054
4_44_438(+)	TCTGAAGAGGAAGCATGGATC	386	188.57	309	169.7	-0.152114
4_44_81(+)	GAGAAAATCAGACAAATGGCG	631	308.25	497	272.95	-0.175464
4_47_1305(-)	CAAACATGTCGGAAACGCGTT	322	157.3	363	199.36	0.341857
5_2025_10469(+)	CTATGAGATAAGTTCAACGTG	2992	1461.63	2718	1492.71	0.0303558
5_2025_10490(+)	TGAATTGCCATAAGATCTCCC	170	83.05	127	69.75	-0.251787
5_2025_10511(+)	ATAATGCTTGGAATATGCCCT	834	407.42	626	343.8	-0.244947
5_28_180(+)	CTTCGGAGTGTTAAGAAGGAT	67	32.73	84	46.13	0.495092
5_28_325(-)	TGGCATCATAGAAGCATGGCA	182	88.91	161	88.42	-0.00797296
5_28_495(+)	CCTGTAGTCTTAGAAGATGTT	467	228.13	370	203.2	-0.166956
5_328_208(+)	TCAACAATCAAGAAATGAGCA	722	352.71	573	314.69	-0.164551
5_328_250(+)	TGTATAGAAGTCTCAAGGGTA	115	56.18	85	46.68	-0.267252
5_328_313(+)	CTTGGGACCAAATGCGAAGAA	813	397.16	703	386.08	-0.0408205
5_328_355(+)	AAAGCCGAATTATACTAACCA	95	46.41	78	42.84	-0.115477
5_328_395(-)	TCAGGGGAGCTTGCATAATCA	839	409.86	736	404.21	-0.0200262
5_328_481(+)	TATTCAGAAAAGATCGTTGTC	2965	1448.44	2723	1495.45	0.0460798
5_328_586(+)	TTAGCAAGATAGACGTGACGT	488	238.39	413	226.82	-0.0717759
5_328_668(-)	AAACACAGAATTGCTTGGCAT	87	42.5	55	30.21	-0.492437
6_1497_376(+)	TATGAAAACAGGGCACTGTAA	57	27.85	43	23.62	-0.237668
6_1497_416(-)	AGCTGGCTGTGGATGGTTAAA	6164	3011.18	3331	1829.36	-0.71899
6_1497_500(-)	TTGCAGTTCTGGATAAGTGGC	3333	1628.21	2164	1188.46	-0.454193
6_1500_266(+)	CAAAGGAAAAGGTCCAGCTGC	77	37.62	56	30.75	-0.290913
6_1500_369(-)	TGAAAAGGAATGCGCACACTA	904	441.61	638	350.39	-0.333811
6_1500_390(-)	TTCATTGAGTTCGTCACAGAA	129	63.02	110	60.41	-0.0610224
6_1500_453(-)	TTTTTAATTCTTTTGTTGGTC	252	123.1	205	112.58	-0.12888
6_61_162(-)	ACAAGGAAATATGATCTGGAG	64	31.26	70	38.44	0.298291
6_61_521(+)	TGGCTGCAAGTGTGTTGGGAG	94	45.92	88	48.33	0.0737964
6_61_561(-)	TAAGACAAAGTGGGAAAGCAA	1339	654.12	1184	650.25	-0.00856083
6_62_100(-)	ATAAGGAGACGATTGCAACTT	2743	1339.99	2234	1226.9	-0.127205
6_62_142(-)	TATTGGGAGAAGTAGTGATGA	475	232.04	433	237.8	0.0353752
6_62_163(-)	TTTTAAAGAAAGAAGAGTTGA	131	63.99	106	58.21	-0.136579
6_62_226(-)	TGTGGCCTTAGAGCAAAGACT	239	116.75	236	129.61	0.150754
6_62_228(+)	TCTTTGCTCTAAGGCCACATA	49	23.94	47	25.81	0.108507
6_62_249(+)	TCAAATGTTTGTGTTGGATTG	2408	1176.34	2192	1203.83	0.0333266
6_62_312(+)	TTGTTAAGGACTCTAATCGGC	12466	6089.78	10495	5763.79	-0.0793723
6_62_375(+)	TCTTGAGAATTTGATGAAGAA	280	136.78	238	130.71	-0.0654878
7_1754_111(-)	AAAGTGACAAAGTTGTTACAA	53	25.89	50	27.46	0.0849367
7_1754_134(+)	GGGTAACATGAGAAGACCTCG	326	159.25	568	311.94	0.969975
7_1754_195(-)	TTCCCTTCTTATCTTTTCTAA	88	42.99	110	60.41	0.490786
7_1754_218(+)	TAAGAAGAATAAGCTCAGGAG	98	47.87	97	53.27	0.154201
7_1754_92(+)	GATAGAAAAGAGACGAGAATT	59	28.82	64	35.15	0.286454
8_2183_233(+)	CCTCATGTCGAGGACTTGGCT	84	41.03	73	40.09	-0.0334367
8_2183_86(+)	CTAGGAAAGACGACACTTGCC	3943	1926.2	3236	1777.19	-0.11616
8_2337_1076(-)	TCTAGGTGGAGATCTTTCGAG	182	88.91	282	154.87	0.80064
8_2337_173(-)	TTTTTGTCCAAAAAGAATCCA	124	60.58	109	59.86	-0.0172493
8_2337_238(+)	ACATATTTCAGAGTAATGCAA	53	25.89	62	34.05	0.39526
8_2337_259(+)	TGGTTTGGTCGATTGCACGAG	365	178.31	429	235.6	0.401952
8_2337_301(+)	GATAAGCGGGAAGATATGATT	206	100.63	90	49.43	-1.0256
8_2337_322(+)	TTTGGAAGGTGGAGAAGCCAG	3261	1593.04	3002	1648.68	0.0495289
8_2337_341(-)	ACAAAGCAAAAATAGGTACCT	55	26.87	59	32.4	0.269997
8_2337_383(-)	TTACCCACCTTGTCAAGTATT	80	39.08	66	36.25	-0.108449
8_2337_406(+)	TGGTAGAAATTGAAAGATGGT	37939	18533.6	32967	18105.3	-0.0337366
8_2337_616(+)	TATGTTAAAGCGAAGATAGGA	79	38.59	58	31.85	-0.276934
8_2915_331(+)	TTTGAAAAAGAGGATTCCGGG	1688	824.61	1834	1007.22	0.288595
8_2915_394(+)	AGAGTCGGAGAAGAGGTGAAA	72	35.17	48	26.36	-0.415995
8_303_452(+)	AGGAGATATAGGAAGTAAGAT	384	187.59	291	159.82	-0.231135
8_773_223(-)	TTCTGATCACTCAAGTAGACA	487	237.91	465	255.38	0.10223
8_773_246(+)	AGAAATGAACGGAGATCGGCT	701	342.45	675	370.71	0.114398
9_1024_157(+)	TCAGGATGAACGCTGGCGGCA	31	15.14	11	6.04	-1.32574
9_1348_8044(+)	TTCCGATGGCCACAAGATTTA	104	50.81	100	54.92	0.112219
9_1348_8105(-)	TCAACATGATGGTTTACTGTT	104	50.81	112	61.51	0.275709
9_1348_8147(-)	TCAATTATGGGAACGTTAGTA	876	427.94	818	449.24	0.0700779
9_1348_8170(+)	CAACCTTTTCAAGACGAGTAG	40	19.54	35	19.22	-0.0238221
9_1348_8191(+)	TTGCTAGAACAGAAGCACCTC	101	49.34	89	48.88	-0.0135134
9_1348_8212(+)	TTGCTCCAACCTTCAAGACTG	58	28.33	38	20.87	-0.4409
9_1348_8357(-)	AGGTTGTTGAAAGAAGGGTCT	170	83.05	209	114.78	0.466819
9_1348_8441(-)	CAAATGATCTTCAATGATGAG	103	50.32	117	64.26	0.352789
9_1348_8443(+)	CATCATTGAAGATCATTTGGG	520	254.03	348	191.12	-0.41052
9_1750_102(+)	TCAGTAAGTTTTGAAGCATGT	187	91.35	254	139.5	0.610788
9_1750_81(+)	TCCCTTTGGATGTCTTCTTGT	34	16.61	56	30.75	0.888534

## Sheet: Table S6
Table S6 List of differentially expressed phasiRNAs with a minimum 10 RPM value in one library
phasiRNA ID	Sequnence	C1D-counts	C1D-RPM	A1D-counts	A1D-RPM	fold-change(log2 A1D/C1D)
6_1497_416(-)	AGCTGGCTGTGGATGGTTAAA	6164	3011.18	3331	1829.36	-0.71899
11_1518_250(+)	TCACTGTGTGAGATGGTAATA	4166	2035.14	2547	1398.8	-0.540938
6_1497_500(-)	TTGCAGTTCTGGATAAGTGGC	3333	1628.21	2164	1188.46	-0.454193
11_1518_166(+)	AAGGAGAAAGGTGGATGAAAT	2801	1368.32	530	291.07	-2.23297
1_541_178(+)	CCAAAAACGGTCTTATGGAAT	1105	539.81	800	439.36	-0.297048
6_1500_369(-)	TGAAAAGGAATGCGCACACTA	904	441.61	638	350.39	-0.333811
9_1348_8443(+)	CATCATTGAAGATCATTTGGG	520	254.03	348	191.12	-0.41052
11_2522_1482(+)	AGGAGATATAGGAAGTAAGAT	399	194.92	295	162.01	-0.266799
1_276_724(+)	AAAGCGTCTGTAGGTGGCTTT	307	149.97	195	107.09	-0.48585
2_526_270(+)	AGGTTAATGGGTCAGGACAGC	295	144.11	181	99.4	-0.535853
1_541_113(-)	ATCCATCCCATGTACATCAAT	292	142.65	217	119.18	-0.259338
8_2337_301(+)	GATAAGCGGGAAGATATGATT	206	100.63	90	49.43	-1.0256
5_2025_10490(+)	TGAATTGCCATAAGATCTCCC	170	83.05	127	69.75	-0.251787
11_1518_229(+)	CGATGATGTTTGTTGCTGGCT	149	72.79	68	37.35	-0.962632
5_328_250(+)	TGTATAGAAGTCTCAAGGGTA	115	56.18	85	46.68	-0.267252
1_541_470(-)	TGTCAAAGATCTTGGAGGTTA	113	55.2	78	42.84	-0.36571
2_526_394(-)	CACAAACATCTCGGAGTCGCG	110	53.74	50	27.46	-0.968665
11_874_543(+)	AAACTAGGTTGTTCCGGAGCA	100	48.85	59	32.4	-0.592365
5_328_668(-)	AAACACAGAATTGCTTGGCAT	87	42.5	55	30.21	-0.492437
1_541_136(+)	CAACTTGATTAGAAAACATTG	84	41.03	44	24.16	-0.764059
12_434_1092(-)	AGTTGTAGTCGGCTTAATGGA	84	41.03	50	27.46	-0.579348
8_2337_616(+)	TATGTTAAAGCGAAGATAGGA	79	38.59	58	31.85	-0.276934
6_1500_266(+)	CAAAGGAAAAGGTCCAGCTGC	77	37.62	56	30.75	-0.290913
8_2915_394(+)	AGAGTCGGAGAAGAGGTGAAA	72	35.17	48	26.36	-0.415995
2_526_541(-)	ACCCCTTGCATTCTTTCACAA	64	31.26	42	23.07	-0.4383
9_1348_8212(+)	TTGCTCCAACCTTCAAGACTG	58	28.33	38	20.87	-0.4409
9_1024_157(+)	TCAGGATGAACGCTGGCGGCA	31	15.14	11	6.04	-1.32574
1_276_220(+)	TCAGGATGAACGCTGGCGGCA	29	14.17	10	5.49	-1.36796
1_276_577(+)	GCGTGGAGGTAGAAGGCCCAC	22	10.75	3	1.65	-2.7038
4_44_268(-)	CCAAGATTATAAGGATGCGAC	332	162.19	352	193.32	0.253306
2_526_249(+)	CGTGGAGATCAGTTGCGTTCA	49	23.94	52	28.56	0.254573
8_2337_341(-)	ACAAAGCAAAAATAGGTACCT	55	26.87	59	32.4	0.269997
2_526_625(-)	TTTGTAATTGTTTAAGGGCAT	66	32.24	71	38.99	0.274252
9_1348_8105(-)	TCAACATGATGGTTTACTGTT	104	50.81	112	61.51	0.275709
11_127_91(+)	AAATCAGGGCAGTTGACATAA	319	155.84	345	189.47	0.281904
7_1754_92(+)	GATAGAAAAGAGACGAGAATT	59	28.82	64	35.15	0.286454
8_2915_331(+)	TTTGAAAAAGAGGATTCCGGG	1688	824.61	1834	1007.22	0.288595
11_2435_868(+)	TCCGGAACTTGAAGAGGTTGG	102	49.83	111	60.96	0.290848
6_61_162(-)	ACAAGGAAATATGATCTGGAG	64	31.26	70	38.44	0.298291
4_47_1305(-)	CAAACATGTCGGAAACGCGTT	322	157.3	363	199.36	0.341857
11_142_4505(+)	ATATTTGGAGTACTGAGGCAT	289	141.18	328	180.14	0.351583
9_1348_8441(-)	CAAATGATCTTCAATGATGAG	103	50.32	117	64.26	0.352789
11_2273_1686(+)	TCCGGAACTTGAAGAGGTTGG	97	47.39	111	60.96	0.36328
1_3183_324(+)	TAATGGTGCTGCGGGGAAGAC	46	22.47	53	29.11	0.373515
10_1305_271(+)	ATATTTGGAGTACTGAGGCAT	309	150.95	357	196.06	0.377224
2_526_144(+)	GAAGTTGTCATGGTCACTGTC	242	118.22	281	154.32	0.384451
11_142_4566(-)	GTAGTTAATAGAATTCGGCTT	447	218.36	522	286.68	0.392733
8_2337_238(+)	ACATATTTCAGAGTAATGCAA	53	25.89	62	34.05	0.39526
8_2337_259(+)	TGGTTTGGTCGATTGCACGAG	365	178.31	429	235.6	0.401952
2_526_331(-)	TAGGAATTCCAAGTTTGTTCA	40	19.54	48	26.36	0.43192
9_1348_8357(-)	AGGTTGTTGAAAGAAGGGTCT	170	83.05	209	114.78	0.466819
10_1305_481(+)	CTTTACTTGTAGAAATAGGGA	42	20.52	52	28.56	0.476965
7_1754_195(-)	TTCCCTTCTTATCTTTTCTAA	88	42.99	110	60.41	0.490786
5_28_180(+)	CTTCGGAGTGTTAAGAAGGAT	67	32.73	84	46.13	0.495092
12_85_97(-)	TAAGAAGAACAAGCTCAGAAA	63	30.78	79	43.39	0.495369
10_1305_332(-)	GTAGTTAATAGAATTCGGCTT	413	201.76	518	284.48	0.495687
11_131_361(+)	TCAAGAAGCATTTGTCTCTGA	88	42.99	115	63.16	0.55501
10_1305_418(+)	TAAGTCGAGATGATAGTTGGA	67	32.73	91	49.98	0.610737
9_1750_102(+)	TCAGTAAGTTTTGAAGCATGT	187	91.35	254	139.5	0.610788
11_2273_1539(+)	TGGGAAGTAAGATCATCGTAA	42	20.52	61	33.5	0.70713
10_1305_229(+)	ACAGAGGTCTGAAGGGTAGGA	145	70.83	215	118.08	0.737332
8_2337_1076(-)	TCTAGGTGGAGATCTTTCGAG	182	88.91	282	154.87	0.80064
9_1750_81(+)	TCCCTTTGGATGTCTTCTTGT	34	16.61	56	30.75	0.888534
7_1754_134(+)	GGGTAACATGAGAAGACCTCG	326	159.25	568	311.94	0.969975
1_1364_205(-)	TTCTTGACCTTGTAAGACCCC	211	103.08	436	239.45	1.21596
1_1364_249(+)	ATGGGGTAGGTAGAGGAACGA	152	74.25	318	174.64	1.23392
1_1364_186(+)	AAGACGTAAGAGATAACACGG	126	61.55	270	148.28	1.26849
1_1364_226(-)	TTCTTGACCTTGTAAGACCTT	52	25.4	118	64.8	1.35117

## Sheet: Table S7
Table S7 The target genes of phasiRNAs
phasiRNA ID	target genes	target score	free energy	target genes descripition
1_276_724(+)	Solyc02g083900.2.1	577	-73.51	Serine/threonine-protein kinase TEL1 (AHRD V1 *--- ATM_CANGA); contains Interpro domain(s) IPR003151 PIK-related kinase, FAT
1_3182_143(+)	Solyc01g066730.2.1	735	-115.2	MADS-box protein (AHRD V1 *-*- D7KFE1_ARALY); contains Interpro domain(s) IPR002100 Transcription factor, MADS-box
1_3182_143(+)	Solyc11g071500.1.1	588	-99.44	MYB transcription factor (AHRD V1 *-*- Q9FNN6_ARATH); contains Interpro domain(s) IPR006447 Myb-like DNA-binding region, SHAQKYF class
1_3182_143(+)	Solyc07g066230.2.1	569	-90.97	Receptor like kinase, RLK
1_3183_303(+)	Solyc04g078690.2.1	578	-54.31	BHLH transcription factor (AHRD V1 *-*- B6TXR4_MAIZE); contains Interpro domain(s) IPR001092 Basic helix-loop-helix dimerisation region bHLH
1_3183_324(+)	Solyc01g010030.2.1	573	-66.27	Receptor-like protein kinase At3g21340 (AHRD V1 *-*- RLK6_ARATH); contains Interpro domain(s) IPR002290 Serine/threonine protein kinase
1_3183_324(+)	Solyc11g011090.1.1	562	-53.41	Tir-nbs-lrr, resistance protein
1_541_115(+)	Solyc11g011090.1.1	570	-71.84	Tir-nbs-lrr, resistance protein
1_541_134(-)	Solyc04g007060.2.1	723	-67	Cc-nbs-lrr, resistance protein
1_541_134(-)	Solyc06g048910.1.1	720	-68.55	Cc-nbs-lrr, resistance protein
1_541_134(-)	Solyc05g050430.1.1	597	-53.63	Cc-nbs-lrr, resistance protein
1_541_134(-)	Solyc05g054010.2.1	597	-51.69	Cc-nbs-lrr, resistance protein
1_541_134(-)	Solyc01g113620.1.1	730	-61.86	NBS-LRR resistance protein (Fragment) (AHRD V1 *-*- C1K2I0_ROSHC); contains Interpro domain(s) IPR002182 NB-ARC
1_541_134(-)	Solyc07g006770.2.1	729	-52.77	Receptor like kinase, RLK
1_541_134(-)	Solyc01g111570.2.1	867	-65.35	Receptor-like kinase (AHRD V1 *-*- A7VM42_MARPO); contains Interpro domain(s) IPR002290 Serine/threonine protein kinase
1_541_134(-)	Solyc04g056570.2.1	741	-66.85	Tir-nbs-lrr, resistance protein
1_541_134(-)	Solyc01g008800.1.1	583	-50.29	Tir-nbs-lrr, resistance protein
1_541_136(+)	Solyc05g044490.2.1	754	-55.81	Cc-nbs-lrr, resistance protein
1_541_136(+)	Solyc05g005330.2.1	727	-53.86	Cc-nbs-lrr, resistance protein with an R1 specific domain
1_541_136(+)	Solyc02g083900.2.1	737	-57.8	Serine/threonine-protein kinase TEL1 (AHRD V1 *--- ATM_CANGA); contains Interpro domain(s) IPR003151 PIK-related kinase, FAT
1_541_136(+)	Solyc01g106770.2.1	902	-71.2	Serine/threonine-protein kinase TEL1 (AHRD V1 *-** ATM_ASHGO); contains Interpro domain(s) IPR003151 PIK-related kinase, FAT
1_541_155(-)	Solyc02g014030.1.1	732	-58.48	Pto-like, Serine/threonine kinase protein, resistance protein
1_541_155(-)	Solyc01g102700.2.1	776	-80.2	Receptor like kinase, RLK
1_541_155(-)	Solyc07g018190.2.1	737	-62.32	Receptor like kinase, RLK
1_541_155(-)	Solyc03g006030.2.1	722	-68.51	Receptor like kinase, RLK
1_541_155(-)	Solyc07g055810.2.1	707	-51.02	Receptor like kinase, RLK
1_541_155(-)	Solyc09g055570.2.1	615	-52.96	Receptor like kinase, RLK
1_541_155(-)	Solyc03g006100.2.1	588	-56.6	Receptor like kinase, RLK
1_541_155(-)	Solyc02g072480.2.1	573	-59.38	Receptor like kinase, RLK
1_541_155(-)	Solyc01g111870.1.1	739	-60.97	Serine/threonine-protein kinase (AHRD V1 *-** D2V0W7_NAEGR); contains Interpro domain(s) IPR000403 Phosphatidylinositol 3- and 4-kinase, catalytic
1_541_155(-)	Solyc05g006620.2.1	714	-51.93	Tir-nbs-lrr, resistance protein
1_541_155(-)	Solyc11g011090.1.1	588	-50.66	Tir-nbs-lrr, resistance protein
1_541_178(+)	Solyc06g051030.2.1	1047	-75.71	Receptor like kinase, RLK
1_541_197(-)	Solyc01g007130.2.1	723	-52.99	Receptor like kinase, RLK
1_541_197(-)	Solyc05g051640.2.1	600	-64.69	Receptor like kinase, RLK
1_541_197(-)	Solyc01g106770.2.1	591	-53.56	Serine/threonine-protein kinase TEL1 (AHRD V1 *-** ATM_ASHGO); contains Interpro domain(s) IPR003151 PIK-related kinase, FAT
1_541_470(-)	Solyc03g007050.2.1	588	-73.49	Receptor like kinase, RLK
1_541_470(-)	Solyc07g056410.2.1	569	-60.93	Receptor like kinase, RLK
1_541_619(+)	Solyc02g083900.2.1	1024	-104.54	Serine/threonine-protein kinase TEL1 (AHRD V1 *--- ATM_CANGA); contains Interpro domain(s) IPR003151 PIK-related kinase, FAT
1_541_619(+)	Solyc01g102880.1.1	734	-64.79	Tir-nbs-lrr, resistance protein
1_541_94(+)	Solyc05g054010.2.1	587	-52.81	Cc-nbs-lrr, resistance protein
1_541_94(+)	Solyc01g056690.2.1	755	-67.17	Kinase family protein (AHRD V1 ***- D7LFV3_ARALY); contains Interpro domain(s) IPR014045 Protein phosphatase 2C, N-terminal
10_1305_229(+)	Solyc07g054980.1.1	1164	-239.74	Myb-related transcription factor (AHRD V1 *--- B5RHV2_MUSBA); contains Interpro domain(s) IPR015495 Myb transcription factor
10_1305_271(+)	Solyc08g074250.1.1	571	-53.87	Cc-nbs-lrr, resistance protein
10_1305_271(+)	Solyc12g056730.1.1	607	-67.83	Receptor like kinase, RLK
10_1305_271(+)	Solyc02g072400.1.1	568	-58.95	Receptor like kinase, RLK
10_1305_271(+)	Solyc02g083900.2.1	605	-64.01	Serine/threonine-protein kinase TEL1 (AHRD V1 *--- ATM_CANGA); contains Interpro domain(s) IPR003151 PIK-related kinase, FAT
10_1305_332(-)	Solyc10g078800.1.1	566	-61.43	Protein phosphatase 2C (AHRD V1 *-*- B6T5D8_MAIZE); contains Interpro domain(s) IPR015655 Protein phosphatase 2C
10_1305_395(-)	Solyc08g075610.1.1	596	-51.09	Receptor like kinase, RLK
10_1305_395(-)	Solyc04g012090.1.1	591	-53.33	Receptor like kinase, RLK
10_1305_418(+)	Solyc02g083900.2.1	598	-65.33	Serine/threonine-protein kinase TEL1 (AHRD V1 *--- ATM_CANGA); contains Interpro domain(s) IPR003151 PIK-related kinase, FAT
10_1305_481(+)	Solyc05g007170.2.1	585	-54.98	Cc-nbs-lrr, resistance protein with an R1 specific domain
11_127_91(+)	Solyc12g008500.1.1	596	-61.63	Receptor like kinase, RLK
11_127_91(+)	Solyc05g006630.2.1	599	-53.8	Tir-nbs-lrr, resistance protein
11_131_361(+)	Solyc05g043420.1.1	873	-79.07	Cc-nbs-lrr, resistance protein
11_131_361(+)	Solyc07g049700.1.1	619	-69.63	Cc-nbs-lrr, resistance protein
11_131_361(+)	Solyc04g007050.2.1	601	-63.32	Cc-nbs-lrr, resistance protein
11_131_361(+)	Solyc04g015210.2.1	590	-51.73	Cc-nbs-lrr, resistance protein
11_131_361(+)	Solyc04g007490.2.1	591	-54.45	Cc-nbs-lrr, resistance protein with an R1 specific domain
11_131_361(+)	Solyc04g080170.2.1	601	-64.56	Protein serine/threonine kinase (AHRD V1 *-** D3BAM4_POLPA); contains Interpro domain(s) IPR002290 Serine/threonine protein kinase
11_131_361(+)	Solyc12g056730.1.1	575	-56.3	Receptor like kinase, RLK
11_131_361(+)	Solyc02g092940.2.1	572	-52.28	Receptor like kinase, RLK
11_131_361(+)	Solyc07g007780.2.1	732	-73.68	Receptor-like kinase (AHRD V1 ***- A7VM39_MARPO); contains Interpro domain(s) IPR002290 Serine/threonine protein kinase
11_131_361(+)	Solyc02g083900.2.1	1002	-100.48	Serine/threonine-protein kinase TEL1 (AHRD V1 *--- ATM_CANGA); contains Interpro domain(s) IPR003151 PIK-related kinase, FAT
11_131_361(+)	Solyc01g106770.2.1	577	-57.73	Serine/threonine-protein kinase TEL1 (AHRD V1 *-** ATM_ASHGO); contains Interpro domain(s) IPR003151 PIK-related kinase, FAT
11_131_361(+)	Solyc01g102850.1.1	603	-59.1	Tir-nbs-lrr, resistance protein
11_142_4505(+)	Solyc08g074250.1.1	571	-53.87	Cc-nbs-lrr, resistance protein
11_142_4505(+)	Solyc12g056730.1.1	607	-67.83	Receptor like kinase, RLK
11_142_4505(+)	Solyc02g072400.1.1	568	-58.95	Receptor like kinase, RLK
11_142_4505(+)	Solyc02g083900.2.1	605	-64.01	Serine/threonine-protein kinase TEL1 (AHRD V1 *--- ATM_CANGA); contains Interpro domain(s) IPR003151 PIK-related kinase, FAT
11_142_4566(-)	Solyc10g078800.1.1	566	-61.43	Protein phosphatase 2C (AHRD V1 *-*- B6T5D8_MAIZE); contains Interpro domain(s) IPR015655 Protein phosphatase 2C
11_1518_166(+)	Solyc01g106770.2.1	765	-84.14	Serine/threonine-protein kinase TEL1 (AHRD V1 *-** ATM_ASHGO); contains Interpro domain(s) IPR003151 PIK-related kinase, FAT
11_1518_229(+)	Solyc11g008560.1.1	904	-88.47	AP2-like ethylene-responsive transcription factor At1g16060 (AHRD V1 *-*- AP2L1_ARATH); contains Interpro domain(s) IPR001471 Pathogenesis-related transcriptional factor and ERF, DNA-binding
11_1518_229(+)	Solyc11g010710.1.1	613	-61.16	AP2-like ethylene-responsive transcription factor At1g16060 (AHRD V1 *-*- AP2L1_ARATH); contains Interpro domain(s) IPR001471 Pathogenesis-related transcriptional factor and ERF, DNA-binding
11_1518_229(+)	Solyc05g051380.2.1	589	-59.06	AP2-like ethylene-responsive transcription factor At1g16060 (AHRD V1 *-*- AP2L1_ARATH); contains Interpro domain(s) IPR001471 Pathogenesis-related transcriptional factor and ERF, DNA-binding
11_1518_229(+)	Solyc05g007170.2.1	1006	-98.5	Cc-nbs-lrr, resistance protein with an R1 specific domain
11_1518_229(+)	Solyc09g091950.1.1	759	-71.03	Ethylene-responsive transcription factor 1 (AHRD V1 *-*- ERF1_ORYSJ); contains Interpro domain(s) IPR001471 Pathogenesis-related transcriptional factor and ERF, DNA-binding
11_1518_229(+)	Solyc11g011770.1.1	743	-69.17	Myb family transcription factor-like (AHRD V1 *--- Q84NK2_ORYSJ); contains Interpro domain(s) IPR006447 Myb-like DNA-binding region, SHAQKYF class
11_1518_229(+)	Solyc06g071230.2.1	616	-72.42	MYB transcription factor (AHRD V1 **** A1DR86_CATRO); contains Interpro domain(s) IPR017930 Myb-type HTH DNA-binding domain
11_1518_229(+)	Solyc03g113620.2.1	601	-53.85	MYB transcription factor (AHRD V1 **** B2CZJ3_CAPAN); contains Interpro domain(s) IPR006447 Myb-like DNA-binding region, SHAQKYF class
11_1518_229(+)	Solyc01g102740.2.1	751	-76.83	NAC domain protein IPR003441 (AHRD V1 *-*- B9GVP9_POPTR); contains Interpro domain(s) IPR003441 No apical meristem (NAM) protein
11_1518_229(+)	Solyc06g063430.1.1	744	-66.07	NAC domain protein IPR003441 (AHRD V1 ***- B9N1Q0_POPTR); contains Interpro domain(s) IPR003441 No apical meristem (NAM) protein
11_1518_229(+)	Solyc10g074890.1.1	590	-73.21	Receptor like kinase, RLK
11_1518_229(+)	Solyc01g010030.2.1	595	-66.25	Receptor-like protein kinase At3g21340 (AHRD V1 *-*- RLK6_ARATH); contains Interpro domain(s) IPR002290 Serine/threonine protein kinase
11_1518_229(+)	Solyc01g111870.1.1	590	-72	Serine/threonine-protein kinase (AHRD V1 *-** D2V0W7_NAEGR); contains Interpro domain(s) IPR000403 Phosphatidylinositol 3- and 4-kinase, catalytic
11_1518_229(+)	Solyc11g033270.1.1	589	-57.28	Serine/threonine-protein kinase 3 (AHRD V1 *-** B2W0T3_PYRTR); contains Interpro domain(s) IPR002290 Serine/threonine protein kinase
11_1518_250(+)	Solyc04g081240.2.1	582	-67.91	Auxin response factor 5 (AHRD V1 ***- D9IVB5_SOLLC); contains Interpro domain(s) IPR010525 Auxin response factor
11_2273_1539(+)	Solyc06g008800.1.1	607	-70.19	Cc-nbs-lrr, resistance protein
11_2273_1539(+)	Solyc06g008770.1.1	594	-63.16	Cc-nbs-lrr, resistance protein
11_2273_1539(+)	Solyc08g066490.2.1	583	-80.29	Receptor like kinase, RLK
11_2522_1482(+)	Solyc03g025170.1.1	713	-68.55	GRAS family transcription factor (AHRD V1 **-* B9H3H7_POPTR); contains Interpro domain(s) IPR005202 GRAS transcription factor
11_2522_1482(+)	Solyc03g006080.2.1	741	-65.95	Receptor like kinase, RLK
11_2522_1482(+)	Solyc02g072470.2.1	603	-59.02	Receptor like kinase, RLK
11_2522_1482(+)	Solyc08g075590.1.1	574	-58.72	Receptor like kinase, RLK
11_2522_1482(+)	Solyc02g086270.2.1	745	-74.84	Receptor-like kinase (AHRD V1 *-*- A7VM25_MARPO); contains Interpro domain(s) IPR002290 Serine/threonine protein kinase
11_2522_1482(+)	Solyc08g013940.2.1	590	-52.66	Serine/threonine protein kinase (AHRD V1 *-** D0NGF5_PHYIN); contains Interpro domain(s) IPR002290 Serine/threonine protein kinase
11_2522_1482(+)	Solyc06g054480.2.1	611	-73.35	Serine/threonine protein kinase-like (AHRD V1 **** Q9FGC3_ARATH); contains Interpro domain(s) IPR002290 Serine/threonine protein kinase
11_874_165(+)	Solyc01g111870.1.1	590	-52.03	Serine/threonine-protein kinase (AHRD V1 *-** D2V0W7_NAEGR); contains Interpro domain(s) IPR000403 Phosphatidylinositol 3- and 4-kinase, catalytic
11_874_79(-)	Solyc11g011090.1.1	863	-70.33	Tir-nbs-lrr, resistance protein
11_874_79(-)	Solyc01g102880.1.1	586	-55.6	Tir-nbs-lrr, resistance protein
12_434_1052(+)	Solyc11g008560.1.1	891	-97.41	AP2-like ethylene-responsive transcription factor At1g16060 (AHRD V1 *-*- AP2L1_ARATH); contains Interpro domain(s) IPR001471 Pathogenesis-related transcriptional factor and ERF, DNA-binding
12_434_1052(+)	Solyc11g010710.1.1	602	-75.05	AP2-like ethylene-responsive transcription factor At1g16060 (AHRD V1 *-*- AP2L1_ARATH); contains Interpro domain(s) IPR001471 Pathogenesis-related transcriptional factor and ERF, DNA-binding
12_434_1052(+)	Solyc07g063830.2.1	629	-74.86	BHLH transcription factor-like protein (AHRD V1 *-*- Q5ZAK6_ORYSJ); contains Interpro domain(s) IPR011598 Helix-loop-helix DNA-binding
12_434_1052(+)	Solyc04g080710.2.1	590	-69.53	BHLH transcription factor-like protein (AHRD V1 *-*- Q5ZAK6_ORYSJ); contains Interpro domain(s) IPR011598 Helix-loop-helix DNA-binding
12_434_1052(+)	Solyc05g007170.2.1	747	-75.44	Cc-nbs-lrr, resistance protein with an R1 specific domain
12_434_1052(+)	Solyc04g071770.2.1	619	-77.53	Ethylene responsive transcription factor 2a (AHRD V1 *-*- C0J9I7_9ROSA); contains Interpro domain(s) IPR001471 Pathogenesis-related transcriptional factor and ERF, DNA-binding
12_434_1052(+)	Solyc09g091950.1.1	900	-92.53	Ethylene-responsive transcription factor 1 (AHRD V1 *-*- ERF1_ORYSJ); contains Interpro domain(s) IPR001471 Pathogenesis-related transcriptional factor and ERF, DNA-binding
12_434_1052(+)	Solyc07g066250.1.1	927	-102.8	GRAS family transcription factor (Fragment) (AHRD V1 **-* B1Q3B1_BRACM); contains Interpro domain(s) IPR005202 GRAS transcription factor
12_434_1052(+)	Solyc11g011770.1.1	922	-110.29	Myb family transcription factor-like (AHRD V1 *--- Q84NK2_ORYSJ); contains Interpro domain(s) IPR006447 Myb-like DNA-binding region, SHAQKYF class
12_434_1052(+)	Solyc05g051060.2.1	753	-87.88	Myb family transcription factor-like (AHRD V1 *--* Q84NK2_ORYSJ); contains Interpro domain(s) IPR006447 Myb-like DNA-binding region, SHAQKYF class
12_434_1052(+)	Solyc06g066340.2.1	758	-83.7	Myb family transcription factor-like protein (AHRD V1 *--- Q84UP8_ORYSJ); contains Interpro domain(s) IPR006447 Myb-like DNA-binding region, SHAQKYF class
12_434_1052(+)	Solyc02g081270.2.1	883	-90.3	NAC domain protein IPR003441 (AHRD V1 ***- B9MWW7_POPTR); contains Interpro domain(s) IPR003441 No apical meristem (NAM) protein
12_434_1052(+)	Solyc06g063430.1.1	768	-88.13	NAC domain protein IPR003441 (AHRD V1 ***- B9N1Q0_POPTR); contains Interpro domain(s) IPR003441 No apical meristem (NAM) protein
12_434_1052(+)	Solyc02g072480.2.1	605	-72.11	Receptor like kinase, RLK
12_434_1052(+)	Solyc10g081420.1.1	600	-74.82	Receptor like kinase, RLK
12_434_1052(+)	Solyc03g124050.2.1	593	-60.61	Receptor like kinase, RLK
12_434_1052(+)	Solyc12g008500.1.1	588	-57.65	Receptor like kinase, RLK
12_434_1052(+)	Solyc11g044460.1.1	580	-75.85	Receptor-like protein kinase At3g21340 (AHRD V1 *-*- RLK6_ARATH); contains Interpro domain(s) IPR002290 Serine/threonine protein kinase
12_434_1052(+)	Solyc04g006930.2.1	596	-85.33	Receptor-like protein kinase At5g59670 (AHRD V1 *-*- RLK7_ARATH); contains Interpro domain(s) IPR002290 Serine/threonine protein kinase
12_434_1052(+)	Solyc07g063720.1.1	714	-77.63	Serine/threonine kinase receptor (AHRD V1 **** Q7DMS5_BRANA); contains Interpro domain(s) IPR002290 Serine/threonine protein kinase
12_434_1052(+)	Solyc11g011090.1.1	737	-78.74	Tir-nbs-lrr, resistance protein
12_434_1052(+)	Solyc02g080890.2.1	598	-67.82	Transcription factor WRKY (AHRD V1 ***- C7E5X8_CAPAN); contains Interpro domain(s) IPR003657 DNA-binding WRKY
12_85_97(-)	Solyc07g053290.2.1	577	-52.71	BHLH transcription factor (AHRD V1 *--* B4FMK3_MAIZE); contains Interpro domain(s) IPR001092 Basic helix-loop-helix dimerisation region bHLH
12_85_97(-)	Solyc04g007060.2.1	729	-51.88	Cc-nbs-lrr, resistance protein
12_85_97(-)	Solyc05g013280.2.1	713	-58.41	Cc-nbs-lrr, resistance protein with an R1 specific domain
12_85_97(-)	Solyc05g009250.1.1	668	-72.79	Ethylene responsive transcription factor 12 (AHRD V1 *-*- C0J9I3_9ROSA); contains Interpro domain(s) IPR001471 Pathogenesis-related transcriptional factor and ERF, DNA-binding
12_85_97(-)	Solyc08g066490.2.1	1032	-91.16	Receptor like kinase, RLK
12_85_97(-)	Solyc07g066230.2.1	748	-61.64	Receptor like kinase, RLK
12_85_97(-)	Solyc02g071860.2.1	734	-64.64	Receptor like kinase, RLK
12_85_97(-)	Solyc06g050560.2.1	728	-51.13	Receptor like kinase, RLK
12_85_97(-)	Solyc03g115610.2.1	616	-50.86	Receptor like kinase, RLK
12_85_97(-)	Solyc09g015170.2.1	599	-51.4	Receptor like kinase, RLK
12_85_97(-)	Solyc08g061560.2.1	588	-59.65	Receptor like kinase, RLK
12_85_97(-)	Solyc02g086270.2.1	586	-53.39	Receptor-like kinase (AHRD V1 *-*- A7VM25_MARPO); contains Interpro domain(s) IPR002290 Serine/threonine protein kinase
12_85_97(-)	Solyc03g121050.2.1	601	-53.78	Receptor-like kinase (AHRD V1 *-*- C0SW32_SOYBN); contains Interpro domain(s) IPR002290 Serine/threonine protein kinase
12_85_97(-)	Solyc03g005130.1.1	1049	-69.98	Receptor-like protein kinase (AHRD V1 ***- B6ST43_MAIZE); contains Interpro domain(s) IPR002290 Serine/threonine protein kinase
12_85_97(-)	Solyc01g111870.1.1	1161	-83.85	Serine/threonine-protein kinase (AHRD V1 *-** D2V0W7_NAEGR); contains Interpro domain(s) IPR000403 Phosphatidylinositol 3- and 4-kinase, catalytic
12_85_97(-)	Solyc02g083900.2.1	761	-63.64	Serine/threonine-protein kinase TEL1 (AHRD V1 *--- ATM_CANGA); contains Interpro domain(s) IPR003151 PIK-related kinase, FAT
12_85_97(-)	Solyc01g106770.2.1	598	-54.07	Serine/threonine-protein kinase TEL1 (AHRD V1 *-** ATM_ASHGO); contains Interpro domain(s) IPR003151 PIK-related kinase, FAT
12_85_97(-)	Solyc11g011090.1.1	742	-50.86	Tir-nbs-lrr, resistance protein
12_98_449(+)	Solyc05g007610.2.1	739	-51.56	Cc-nbs-lrr, resistance protein with an R1 specific domain
12_98_449(+)	Solyc03g006030.2.1	1012	-68.08	Receptor like kinase, RLK
12_98_449(+)	Solyc06g048950.2.1	578	-54.14	Receptor like kinase, RLK
12_98_449(+)	Solyc08g013940.2.1	603	-59.39	Serine/threonine protein kinase (AHRD V1 *-** D0NGF5_PHYIN); contains Interpro domain(s) IPR002290 Serine/threonine protein kinase
2_526_102(+)	Solyc04g015210.2.1	597	-65.26	Cc-nbs-lrr, resistance protein
2_526_102(+)	Solyc05g013280.2.1	618	-67.82	Cc-nbs-lrr, resistance protein with an R1 specific domain
2_526_102(+)	Solyc05g051640.2.1	741	-69.08	Receptor like kinase, RLK
2_526_102(+)	Solyc03g019980.1.1	598	-58.8	Receptor like kinase, RLK
2_526_102(+)	Solyc11g069960.1.1	588	-50.4	Receptor like kinase, RLK
2_526_102(+)	Solyc03g093330.2.1	586	-56.04	Receptor like kinase, RLK
2_526_102(+)	Solyc11g011090.1.1	865	-91.55	Tir-nbs-lrr, resistance protein
2_526_144(+)	Solyc09g098130.1.1	592	-61.91	Cc-nbs-lrr, resistance protein
2_526_144(+)	Solyc09g092290.1.1	576	-53.12	Cc-nbs-lrr, resistance protein
2_526_144(+)	Solyc07g006840.1.1	1016	-88.75	NAC domain protein IPR003441 (AHRD V1 *-*- B9H255_POPTR); contains Interpro domain(s) IPR003441 No apical meristem (NAM) protein
2_526_144(+)	Solyc02g081270.2.1	613	-81.25	NAC domain protein IPR003441 (AHRD V1 ***- B9MWW7_POPTR); contains Interpro domain(s) IPR003441 No apical meristem (NAM) protein
2_526_144(+)	Solyc01g103530.2.1	753	-71.44	Receptor like kinase, RLK
2_526_144(+)	Solyc09g055180.2.1	737	-63.64	Receptor like kinase, RLK
2_526_144(+)	Solyc02g023950.2.1	727	-69.19	Receptor like kinase, RLK
2_526_144(+)	Solyc03g082450.2.1	727	-58.48	Receptor like kinase, RLK
2_526_144(+)	Solyc04g071680.1.1	594	-52.47	Receptor like kinase, RLK
2_526_144(+)	Solyc08g075590.1.1	593	-50.27	Receptor like kinase, RLK
2_526_144(+)	Solyc04g008430.1.1	590	-50.64	Receptor like kinase, RLK
2_526_144(+)	Solyc07g007220.2.1	608	-62.48	Serine/threonine phosphatase family protein (AHRD V1 **** C1E0J1_9CHLO); contains Interpro domain(s) IPR015655 Protein phosphatase 2C
2_526_163(-)	Solyc04g007490.2.1	590	-68.71	Cc-nbs-lrr, resistance protein with an R1 specific domain
2_526_226(-)	Solyc01g096940.2.1	895	-97.78	Receptor like kinase, RLK
2_526_226(-)	Solyc04g074000.2.1	887	-77.95	Receptor like kinase, RLK
2_526_226(-)	Solyc06g069650.2.1	885	-93.18	Receptor like kinase, RLK
2_526_226(-)	Solyc07g053600.2.1	734	-66.03	Receptor like kinase, RLK
2_526_226(-)	Solyc04g012100.1.1	732	-79.37	Receptor like kinase, RLK
2_526_226(-)	Solyc02g067560.1.1	725	-65.83	Receptor like kinase, RLK
2_526_226(-)	Solyc09g072810.2.1	725	-75.47	Receptor like kinase, RLK
2_526_226(-)	Solyc02g077630.2.1	720	-66.86	Receptor like kinase, RLK
2_526_226(-)	Solyc04g064940.2.1	601	-62.23	Receptor like kinase, RLK
2_526_226(-)	Solyc06g065260.2.1	591	-66.62	Receptor like kinase, RLK
2_526_226(-)	Solyc09g061940.1.1	591	-55.35	Receptor like kinase, RLK
2_526_226(-)	Solyc11g020280.1.1	590	-58.14	Receptor like kinase, RLK
2_526_226(-)	Solyc09g098420.1.1	587	-57.46	Receptor like kinase, RLK
2_526_226(-)	Solyc09g015520.2.1	579	-52.09	Receptor like kinase, RLK
2_526_226(-)	Solyc02g070000.2.1	569	-53.56	Receptor like kinase, RLK
2_526_226(-)	Solyc03g026040.2.1	568	-53.65	Receptor like kinase, RLK
2_526_226(-)	Solyc09g066440.2.1	589	-64.47	Serine/threonine kinase (AHRD V1 **** D8UCQ6_VOLCA); contains Interpro domain(s) IPR002290 Serine/threonine protein kinase
2_526_226(-)	Solyc02g083900.2.1	744	-84.44	Serine/threonine-protein kinase TEL1 (AHRD V1 *--- ATM_CANGA); contains Interpro domain(s) IPR003151 PIK-related kinase, FAT
2_526_249(+)	Solyc01g112050.2.1	593	-56.49	Bzip transcription factor-like (AHRD V1 *-*- Q8RU34_ORYSJ); contains Interpro domain(s) IPR006867 Protein of unknown function DUF632
2_526_249(+)	Solyc04g050170.2.1	598	-62.7	Receptor like kinase, RLK
2_526_331(-)	Solyc04g008130.1.1	602	-63.06	Cc-nbs-lrr, resistance protein
2_526_331(-)	Solyc04g008200.2.1	602	-58.86	Cc-nbs-lrr, resistance protein
2_526_331(-)	Solyc03g082450.2.1	881	-86.34	Receptor like kinase, RLK
2_526_331(-)	Solyc03g082470.2.1	745	-70.22	Receptor like kinase, RLK
2_526_331(-)	Solyc03g096190.1.1	734	-62.14	Receptor like kinase, RLK
2_526_331(-)	Solyc07g065860.2.1	722	-59.39	Receptor like kinase, RLK
2_526_331(-)	Solyc09g072810.2.1	719	-65.63	Receptor like kinase, RLK
2_526_331(-)	Solyc04g008430.1.1	715	-68.02	Receptor like kinase, RLK
2_526_331(-)	Solyc02g031790.1.1	605	-58.55	Receptor like kinase, RLK
2_526_331(-)	Solyc05g007230.2.1	602	-51.69	Receptor like kinase, RLK
2_526_331(-)	Solyc11g017270.1.1	593	-57.51	Receptor like kinase, RLK
2_526_331(-)	Solyc03g007050.2.1	585	-54.65	Receptor like kinase, RLK
2_526_331(-)	Solyc07g056410.2.1	581	-51.07	Receptor like kinase, RLK
2_526_331(-)	Solyc07g005920.1.1	580	-61.19	Receptor like kinase, RLK
2_526_331(-)	Solyc06g048950.2.1	569	-64.04	Receptor like kinase, RLK
2_526_331(-)	Solyc08g061560.2.1	567	-51.7	Receptor like kinase, RLK
2_526_331(-)	Solyc02g083900.2.1	591	-67.97	Serine/threonine-protein kinase TEL1 (AHRD V1 *--- ATM_CANGA); contains Interpro domain(s) IPR003151 PIK-related kinase, FAT
2_526_438(+)	Solyc02g072470.2.1	721	-69.77	Receptor like kinase, RLK
2_526_438(+)	Solyc04g051510.1.1	590	-61.8	Receptor like kinase, RLK
2_526_438(+)	Solyc04g045600.2.1	585	-51.5	Serine/threonine kinase (AHRD V1 **** Q32SF8_HORVD); contains Interpro domain(s) IPR002290 Serine/threonine protein kinase
2_526_438(+)	Solyc02g083900.2.1	1186	-94.92	Serine/threonine-protein kinase TEL1 (AHRD V1 *--- ATM_CANGA); contains Interpro domain(s) IPR003151 PIK-related kinase, FAT
2_526_625(-)	Solyc02g036270.2.1	940	-96.08	Cc-nbs-lrr, resistance protein
2_526_625(-)	Solyc04g005540.2.1	580	-60.34	Cc-nbs-lrr, resistance protein
2_526_625(-)	Solyc04g005550.1.1	579	-53.43	Cc-nbs-lrr, resistance protein
4_44_165(+)	Solyc05g007170.2.1	1010	-98.98	Cc-nbs-lrr, resistance protein with an R1 specific domain
4_44_165(+)	Solyc04g015630.2.1	577	-53.67	Nbs-lrr, resistance protein
4_44_165(+)	Solyc11g017270.1.1	1050	-114.77	Receptor like kinase, RLK
4_44_165(+)	Solyc11g017280.1.1	747	-78.53	Receptor like kinase, RLK
4_44_165(+)	Solyc08g066210.2.1	744	-70.65	Receptor like kinase, RLK
4_44_165(+)	Solyc01g103530.2.1	602	-59.08	Receptor like kinase, RLK
4_44_165(+)	Solyc03g098400.1.1	575	-63.95	Receptor like kinase, RLK
4_44_165(+)	Solyc03g093330.2.1	566	-53.85	Receptor like kinase, RLK
4_44_165(+)	Solyc02g086270.2.1	713	-74.75	Receptor-like kinase (AHRD V1 *-*- A7VM25_MARPO); contains Interpro domain(s) IPR002290 Serine/threonine protein kinase
4_44_165(+)	Solyc10g054050.1.1	578	-62.56	Receptor-like kinase (AHRD V1 **** A7VM23_MARPO); contains Interpro domain(s) IPR002290 Serine/threonine protein kinase
4_44_268(-)	Solyc05g007610.2.1	743	-59	Cc-nbs-lrr, resistance protein with an R1 specific domain
4_44_268(-)	Solyc01g056690.2.1	602	-62.97	Kinase family protein (AHRD V1 ***- D7LFV3_ARALY); contains Interpro domain(s) IPR014045 Protein phosphatase 2C, N-terminal
4_44_268(-)	Solyc01g066730.2.1	888	-74.3	MADS-box protein (AHRD V1 *-*- D7KFE1_ARALY); contains Interpro domain(s) IPR002100 Transcription factor, MADS-box
4_44_268(-)	Solyc07g063000.2.1	876	-87.09	Receptor like kinase, RLK
4_44_268(-)	Solyc09g091400.2.1	753	-56.41	Receptor like kinase, RLK
4_44_268(-)	Solyc04g081590.2.1	747	-62.9	Receptor like kinase, RLK
4_44_268(-)	Solyc07g018180.1.1	742	-54.03	Receptor like kinase, RLK
4_44_268(-)	Solyc04g050170.2.1	732	-74.3	Receptor like kinase, RLK
4_44_268(-)	Solyc03g082470.2.1	731	-72.38	Receptor like kinase, RLK
4_44_268(-)	Solyc02g092940.2.1	727	-76.15	Receptor like kinase, RLK
4_44_268(-)	Solyc01g103530.2.1	726	-57.66	Receptor like kinase, RLK
4_44_268(-)	Solyc03g096190.1.1	725	-71.76	Receptor like kinase, RLK
4_44_268(-)	Solyc02g072400.1.1	705	-53.52	Receptor like kinase, RLK
4_44_268(-)	Solyc07g005540.1.1	611	-60.75	Receptor like kinase, RLK
4_44_268(-)	Solyc07g005010.2.1	584	-58.54	Receptor like kinase, RLK
4_44_268(-)	Solyc05g008860.2.1	579	-56.56	Receptor like kinase, RLK
4_44_268(-)	Solyc06g065260.2.1	575	-54.99	Receptor like kinase, RLK
4_44_268(-)	Solyc10g084250.1.1	730	-56.3	Receptor-like kinase (AHRD V1 *-*- A7VM32_MARPO); contains Interpro domain(s) IPR002290 Serine/threonine protein kinase
4_44_268(-)	Solyc11g011090.1.1	1024	-72.17	Tir-nbs-lrr, resistance protein
4_44_268(-)	Solyc04g056570.2.1	752	-68.04	Tir-nbs-lrr, resistance protein
4_44_438(+)	Solyc11g069190.1.1	592	-65.22	Auxin response factor 4 (AHRD V1 **** Q2LAI9_SOLLC); contains Interpro domain(s) IPR011525 Aux/IAA-ARF-dimerisation IPR003340 Transcriptional factor B3
4_44_438(+)	Solyc04g008120.1.1	572	-62	Cc-nbs-lrr, resistance protein
4_44_438(+)	Solyc05g012910.2.1	886	-99.32	Cc-nbs-lrr, resistance protein with an R1 specific domain
4_44_438(+)	Solyc05g012890.1.1	584	-65.5	Cc-nbs-lrr, resistance protein with an R1 specific domain
4_44_438(+)	Solyc03g033610.1.1	585	-72.06	Receptor like kinase, RLK
4_44_438(+)	Solyc11g039590.1.1	582	-65.99	Serine/threonine protein kinase (AHRD V1 ***- D0NNA3_PHYIN); contains Interpro domain(s) IPR011009 Protein kinase-like
4_44_438(+)	Solyc04g008400.1.1	575	-53.14	Serine/threonine-protein kinase receptor (AHRD V1 **** B6U2B7_MAIZE); contains Interpro domain(s) IPR002290 Serine/threonine protein kinase
4_44_438(+)	Solyc01g102880.1.1	744	-94.68	Tir-nbs-lrr, resistance protein
4_44_438(+)	Solyc01g102850.1.1	599	-66.47	Tir-nbs-lrr, resistance protein
4_44_438(+)	Solyc08g068320.2.1	580	-63.84	Transcription factor myb (AHRD V1 *-** Q5QT32_ORYSA); contains Interpro domain(s) IPR015495 Myb transcription factor
4_44_81(+)	Solyc11g006530.1.1	599	-64.23	Cc-nbs-lrr, resistance protein
4_44_81(+)	Solyc05g005130.1.1	717	-57.23	Cc-nbs-lrr, resistance protein with an R1 specific domain
4_44_81(+)	Solyc03g093330.2.1	1029	-86.91	Receptor like kinase, RLK
4_44_81(+)	Solyc11g069960.1.1	595	-53.7	Receptor like kinase, RLK
4_47_1305(-)	Solyc06g036080.2.1	613	-54.66	Protein serine/threonine kinase (AHRD V1 *-** D3BP85_POLPA); contains Interpro domain(s) IPR002290 Serine/threonine protein kinase
5_2025_10469(+)	Solyc05g007170.2.1	1177	-121.26	Cc-nbs-lrr, resistance protein with an R1 specific domain
5_2025_10469(+)	Solyc06g050560.2.1	751	-72.29	Receptor like kinase, RLK
5_2025_10490(+)	Solyc01g111870.1.1	872	-86.33	Serine/threonine-protein kinase (AHRD V1 *-** D2V0W7_NAEGR); contains Interpro domain(s) IPR000403 Phosphatidylinositol 3- and 4-kinase, catalytic
5_28_180(+)	Solyc11g069620.1.1	598	-55.21	Cc-nbs-lrr, resistance protein
5_28_180(+)	Solyc12g044200.1.1	507	-80.79	Cc-nbs-lrr, resistance protein
5_28_180(+)	Solyc03g121230.2.1	579	-59.62	Receptor like kinase, RLK
5_28_325(-)	Solyc05g013280.2.1	579	-73.62	Cc-nbs-lrr, resistance protein with an R1 specific domain
5_28_325(-)	Solyc02g083900.2.1	714	-83.68	Serine/threonine-protein kinase TEL1 (AHRD V1 *--- ATM_CANGA); contains Interpro domain(s) IPR003151 PIK-related kinase, FAT
5_328_208(+)	Solyc05g007170.2.1	586	-54.09	Cc-nbs-lrr, resistance protein with an R1 specific domain
5_328_208(+)	Solyc05g012740.1.1	584	-53.77	Cc-nbs-lrr, resistance protein with an R1 specific domain
5_328_481(+)	Solyc08g013940.2.1	744	-63.48	Serine/threonine protein kinase (AHRD V1 *-** D0NGF5_PHYIN); contains Interpro domain(s) IPR002290 Serine/threonine protein kinase
5_328_481(+)	Solyc01g111870.1.1	615	-54.02	Serine/threonine-protein kinase (AHRD V1 *-** D2V0W7_NAEGR); contains Interpro domain(s) IPR000403 Phosphatidylinositol 3- and 4-kinase, catalytic
5_328_481(+)	Solyc11g011090.1.1	730	-50.87	Tir-nbs-lrr, resistance protein
5_328_586(+)	Solyc02g067560.1.1	587	-68.35	Receptor like kinase, RLK
5_328_586(+)	Solyc01g094830.2.1	583	-51.48	Receptor-like protein kinase (AHRD V1 **** Q39203_ARATH); contains Interpro domain(s) IPR002528 Multi antimicrobial extrusion protein MatE
5_328_586(+)	Solyc01g106770.2.1	592	-50.22	Serine/threonine-protein kinase TEL1 (AHRD V1 *-** ATM_ASHGO); contains Interpro domain(s) IPR003151 PIK-related kinase, FAT
5_328_668(-)	Solyc02g083900.2.1	605	-54.77	Serine/threonine-protein kinase TEL1 (AHRD V1 *--- ATM_CANGA); contains Interpro domain(s) IPR003151 PIK-related kinase, FAT
6_1497_376(+)	Solyc02g081040.2.1	749	-70.47	Receptor-like kinase (AHRD V1 *-** A7VM33_MARPO); contains Interpro domain(s) IPR002290 Serine/threonine protein kinase
6_1497_500(-)	Solyc02g072440.2.1	590	-70.39	Receptor like kinase, RLK
6_1497_500(-)	Solyc02g071870.2.1	587	-63.39	Receptor like kinase, RLK
6_1497_500(-)	Solyc04g064940.2.1	578	-75.68	Receptor like kinase, RLK
6_1497_500(-)	Solyc06g068980.2.1	770	-85.2	Serine/threonine-protein kinase B-raf (AHRD V1 *-** BRAF_HUMAN); contains Interpro domain(s) IPR002290 Serine/threonine protein kinase
6_1497_500(-)	Solyc01g102880.1.1	576	-62.87	Tir-nbs-lrr, resistance protein
6_1500_266(+)	Solyc05g007170.2.1	1048	-116.55	Cc-nbs-lrr, resistance protein with an R1 specific domain
6_1500_266(+)	Solyc06g082610.2.1	731	-77.2	Receptor like kinase, RLK
6_1500_266(+)	Solyc02g072480.2.1	725	-61.08	Receptor like kinase, RLK
6_1500_266(+)	Solyc03g118510.2.1	607	-53.56	Receptor like kinase, RLK
6_1500_266(+)	Solyc07g005010.2.1	584	-64.41	Receptor like kinase, RLK
6_1500_369(-)	Solyc03g093330.2.1	584	-51.62	Receptor like kinase, RLK
6_1500_390(-)	Solyc10g085460.1.1	889	-75.27	Cc-nbs-lrr, resistance protein
6_1500_390(-)	Solyc05g047700.1.1	608	-52.58	Cc-nbs-lrr, resistance protein
6_1500_390(-)	Solyc01g109950.2.1	588	-50.37	Pto-like, Serine/threonine kinase protein, resistance protein
6_1500_390(-)	Solyc09g098290.2.1	613	-59.69	Receptor like kinase, RLK
6_1500_390(-)	Solyc10g080510.1.1	588	-65.78	Receptor-like kinase (AHRD V1 ***- A7VM32_MARPO); contains Interpro domain(s) IPR002290 Serine/threonine protein kinase
6_1500_390(-)	Solyc03g112950.2.1	596	-67.47	Serine/threonine-protein kinase (AHRD V1 ***- D2V0W7_NAEGR); contains Interpro domain(s) IPR015519 Ataxia-Telangiectasia Mutated
6_1500_390(-)	Solyc02g083900.2.1	898	-88.17	Serine/threonine-protein kinase TEL1 (AHRD V1 *--- ATM_CANGA); contains Interpro domain(s) IPR003151 PIK-related kinase, FAT
6_1500_453(-)	Solyc11g006640.1.1	727	-60.37	Cc-nbs-lrr, resistance protein
6_1500_453(-)	Solyc07g049180.2.1	1044	-52.47	Receptor-like protein kinase At5g59670 (AHRD V1 *-** RLK7_ARATH); contains Interpro domain(s) IPR002290 Serine/threonine protein kinase
6_61_162(-)	Solyc02g036370.2.1	597	-58.06	MYB transcription factor (Fragment) (AHRD V1 **-* A1DR85_CATRO); contains Interpro domain(s) IPR006447 Myb-like DNA-binding region, SHAQKYF class
6_61_162(-)	Solyc06g006040.1.1	590	-58.72	Receptor like kinase, RLK
6_61_162(-)	Solyc02g072470.2.1	585	-54.69	Receptor like kinase, RLK
6_61_162(-)	Solyc02g083900.2.1	727	-71.45	Serine/threonine-protein kinase TEL1 (AHRD V1 *--- ATM_CANGA); contains Interpro domain(s) IPR003151 PIK-related kinase, FAT
6_61_162(-)	Solyc11g011090.1.1	1062	-114.67	Tir-nbs-lrr, resistance protein
6_61_162(-)	Solyc11g011080.1.1	585	-61.52	Tir-nbs-lrr, resistance protein
6_61_162(-)	Solyc08g005510.1.1	582	-61.59	Tir-nbs-lrr, resistance protein
6_61_521(+)	Solyc07g042260.2.1	1171	-175.09	Auxin response factor 1 (AHRD V1 *-*- Q6L8U3_CUCSA); contains Interpro domain(s) IPR010525 Auxin response factor
6_61_521(+)	Solyc05g047460.2.1	598	-83.39	Auxin response factor 19 (AHRD V1 ***- D9IA29_SOLLC); contains Interpro domain(s) IPR010525 Auxin response factor
6_61_561(-)	Solyc09g098100.2.1	607	-59.23	Cc-nbs-lrr, resistance protein
6_61_561(-)	Solyc05g054010.2.1	596	-55.95	Cc-nbs-lrr, resistance protein
6_61_561(-)	Solyc09g060110.2.1	591	-56.33	Pto-like, Serine/threonine kinase protein, resistance protein
6_61_561(-)	Solyc03g112940.2.1	756	-71.97	Serine/threonine-protein kinase ATM (AHRD V1 ***- ATM_ARATH)
6_61_561(-)	Solyc04g008400.1.1	580	-51.67	Serine/threonine-protein kinase receptor (AHRD V1 **** B6U2B7_MAIZE); contains Interpro domain(s) IPR002290 Serine/threonine protein kinase
6_61_561(-)	Solyc07g052770.2.1	600	-60.62	Tir-nbs-lrr, resistance protein
6_62_142(-)	Solyc11g006640.1.1	568	-62.56	Cc-nbs-lrr, resistance protein
6_62_142(-)	Solyc11g017270.1.1	607	-61.83	Receptor like kinase, RLK
6_62_142(-)	Solyc03g059020.1.1	602	-66.62	Receptor like kinase, RLK
6_62_142(-)	Solyc05g008950.2.1	572	-57.68	Receptor-like kinase (AHRD V1 *-*- A7VM25_MARPO); contains Interpro domain(s) IPR002290 Serine/threonine protein kinase
6_62_228(+)	Solyc04g050940.1.1	739	-77.5	Receptor protein kinase-like (AHRD V1 *-** B6SP14_MAIZE); contains Interpro domain(s) IPR002290 Serine/threonine protein kinase
6_62_228(+)	Solyc02g083900.2.1	722	-71.29	Serine/threonine-protein kinase TEL1 (AHRD V1 *--- ATM_CANGA); contains Interpro domain(s) IPR003151 PIK-related kinase, FAT
6_62_249(+)	Solyc09g092310.1.1	739	-77.47	Cc-nbs-lrr, resistance protein
6_62_249(+)	Solyc07g055200.2.1	744	-70.15	Kinase family protein (AHRD V1 ***- D7M6L5_ARALY); contains Interpro domain(s) IPR002290 Serine/threonine protein kinase
6_62_249(+)	Solyc01g059910.2.1	729	-66.99	Pto-like, Serine/threonine kinase protein, resistance protein
6_62_249(+)	Solyc07g008400.1.1	729	-65.95	Pto-like, Serine/threonine kinase protein, resistance protein
6_62_249(+)	Solyc09g091260.2.1	581	-58.68	Receptor like kinase, RLK
6_62_249(+)	Solyc02g072070.2.1	596	-57.92	Receptor-like kinase (AHRD V1 **** B6EB06_NICGU); contains Interpro domain(s) IPR002290 Serine/threonine protein kinase
6_62_249(+)	Solyc05g007850.1.1	735	-70.82	Tir-nbs-lrr, resistance protein
6_62_249(+)	Solyc11g011350.1.1	585	-57.48	Tir-nbs-lrr, resistance protein
6_62_375(+)	Solyc04g009250.1.1	749	-77.15	Cc-nbs-lrr, resistance protein
6_62_375(+)	Solyc03g005650.1.1	596	-66.16	Cc-nbs-lrr, resistance protein
6_62_375(+)	Solyc04g009660.2.1	592	-59.93	Cc-nbs-lrr, resistance protein
6_62_375(+)	Solyc04g009130.2.1	591	-59.5	Cc-nbs-lrr, resistance protein
6_62_375(+)	Solyc04g009150.1.1	590	-58.54	Cc-nbs-lrr, resistance protein
6_62_375(+)	Solyc04g009290.1.1	588	-60.02	Cc-nbs-lrr, resistance protein
6_62_375(+)	Solyc08g075640.2.1	588	-54.64	Cc-nbs-lrr, resistance protein
6_62_375(+)	Solyc04g008140.1.1	587	-55.52	Cc-nbs-lrr, resistance protein
6_62_375(+)	Solyc11g010160.1.1	586	-58.32	Cc-nbs-lrr, resistance protein
6_62_375(+)	Solyc04g009110.1.1	583	-58.61	Cc-nbs-lrr, resistance protein
6_62_375(+)	Solyc05g012910.2.1	607	-68.07	Cc-nbs-lrr, resistance protein with an R1 specific domain
6_62_375(+)	Solyc05g007170.2.1	602	-53.67	Cc-nbs-lrr, resistance protein with an R1 specific domain
6_62_375(+)	Solyc04g007490.2.1	593	-57.55	Cc-nbs-lrr, resistance protein with an R1 specific domain
6_62_375(+)	Solyc07g006750.2.1	590	-72.65	MYB transcription factor (AHRD V1 *-** Q9T066_ARATH); contains Interpro domain(s) IPR015495 Myb transcription factor
6_62_375(+)	Solyc01g113620.1.1	608	-58.86	NBS-LRR resistance protein (Fragment) (AHRD V1 *-*- C1K2I0_ROSHC); contains Interpro domain(s) IPR002182 NB-ARC
6_62_375(+)	Solyc04g080170.2.1	620	-65.32	Protein serine/threonine kinase (AHRD V1 *-** D3BAM4_POLPA); contains Interpro domain(s) IPR002290 Serine/threonine protein kinase
6_62_375(+)	Solyc06g065260.2.1	598	-67.65	Receptor like kinase, RLK
6_62_375(+)	Solyc02g072400.1.1	583	-55.06	Receptor like kinase, RLK
6_62_375(+)	Solyc12g044840.1.1	602	-63.89	Receptor-like kinase (AHRD V1 *-*- A7VM65_9VIRI); contains Interpro domain(s) IPR002290 Serine/threonine protein kinase
6_62_375(+)	Solyc03g121440.2.1	613	-70.59	Receptor-like protein kinase At3g21340 (AHRD V1 *-*- RLK6_ARATH); contains Interpro domain(s) IPR002290 Serine/threonine protein kinase
6_62_375(+)	Solyc07g063700.1.1	607	-71.41	Serine/threonine kinase receptor (AHRD V1 **** Q7DMS5_BRANA); contains Interpro domain(s) IPR002290 Serine/threonine protein kinase
6_62_375(+)	Solyc01g111870.1.1	907	-91.71	Serine/threonine-protein kinase (AHRD V1 *-** D2V0W7_NAEGR); contains Interpro domain(s) IPR000403 Phosphatidylinositol 3- and 4-kinase, catalytic
6_62_375(+)	Solyc03g112940.2.1	586	-61	Serine/threonine-protein kinase ATM (AHRD V1 ***- ATM_ARATH)
7_1754_111(-)	Solyc02g072470.2.1	599	-54.58	Receptor like kinase, RLK
7_1754_195(-)	Solyc11g069190.1.1	591	-71.11	Auxin response factor 4 (AHRD V1 **** Q2LAI9_SOLLC); contains Interpro domain(s) IPR011525 Aux/IAA-ARF-dimerisation IPR003340 Transcriptional factor B3
7_1754_195(-)	Solyc06g050520.1.1	622	-67.96	Ethylene-responsive transcription factor 1 (AHRD V1 *-*- ERF1_ORYSJ); contains Interpro domain(s) IPR001471 Pathogenesis-related transcriptional factor and ERF, DNA-binding
7_1754_195(-)	Solyc03g112940.2.1	624	-68.48	Serine/threonine-protein kinase ATM (AHRD V1 ***- ATM_ARATH)
7_1754_195(-)	Solyc03g119140.2.1	605	-72.31	Serine/threonine-protein kinase B-raf (AHRD V1 *-** BRAF_HUMAN); contains Interpro domain(s) IPR002290 Serine/threonine protein kinase
7_1754_195(-)	Solyc02g082050.2.1	585	-63.93	Tir-nbs-lrr, resistance protein
7_1754_218(+)	Solyc02g088310.1.1	613	-53.59	AP2/ERF domain-containing transcription factor (AHRD V1 ***- B9IK18_POPTR); contains Interpro domain(s) IPR001471 Pathogenesis-related transcriptional factor and ERF, DNA-binding
7_1754_218(+)	Solyc11g069190.1.1	745	-54.7	Auxin response factor 4 (AHRD V1 **** Q2LAI9_SOLLC); contains Interpro domain(s) IPR011525 Aux/IAA-ARF-dimerisation IPR003340 Transcriptional factor B3
7_1754_218(+)	Solyc04g007060.2.1	734	-55.46	Cc-nbs-lrr, resistance protein
7_1754_218(+)	Solyc05g013280.2.1	723	-67.41	Cc-nbs-lrr, resistance protein with an R1 specific domain
7_1754_218(+)	Solyc05g009250.1.1	636	-66.88	Ethylene responsive transcription factor 12 (AHRD V1 *-*- C0J9I3_9ROSA); contains Interpro domain(s) IPR001471 Pathogenesis-related transcriptional factor and ERF, DNA-binding
7_1754_218(+)	Solyc02g092940.2.1	912	-92.02	Receptor like kinase, RLK
7_1754_218(+)	Solyc08g066490.2.1	888	-88.22	Receptor like kinase, RLK
7_1754_218(+)	Solyc03g093330.2.1	738	-66.96	Receptor like kinase, RLK
7_1754_218(+)	Solyc02g071860.2.1	736	-59.96	Receptor like kinase, RLK
7_1754_218(+)	Solyc07g066230.2.1	611	-54.15	Receptor like kinase, RLK
7_1754_218(+)	Solyc03g115610.2.1	609	-53.34	Receptor like kinase, RLK
7_1754_218(+)	Solyc03g026040.2.1	604	-55.09	Receptor like kinase, RLK
7_1754_218(+)	Solyc11g071880.1.1	597	-56.67	Receptor like kinase, RLK
7_1754_218(+)	Solyc09g015170.2.1	594	-51.26	Receptor like kinase, RLK
7_1754_218(+)	Solyc03g082470.2.1	590	-54.55	Receptor like kinase, RLK
7_1754_218(+)	Solyc06g074070.2.1	582	-52.37	Receptor like kinase, RLK
7_1754_218(+)	Solyc09g061940.1.1	580	-55.17	Receptor like kinase, RLK
7_1754_218(+)	Solyc02g086270.2.1	751	-85.74	Receptor-like kinase (AHRD V1 *-*- A7VM25_MARPO); contains Interpro domain(s) IPR002290 Serine/threonine protein kinase
7_1754_218(+)	Solyc03g121050.2.1	597	-59.49	Receptor-like kinase (AHRD V1 *-*- C0SW32_SOYBN); contains Interpro domain(s) IPR002290 Serine/threonine protein kinase
7_1754_218(+)	Solyc03g005130.1.1	1049	-83.64	Receptor-like protein kinase (AHRD V1 ***- B6ST43_MAIZE); contains Interpro domain(s) IPR002290 Serine/threonine protein kinase
7_1754_218(+)	Solyc01g111870.1.1	1308	-99.9	Serine/threonine-protein kinase (AHRD V1 *-** D2V0W7_NAEGR); contains Interpro domain(s) IPR000403 Phosphatidylinositol 3- and 4-kinase, catalytic
7_1754_218(+)	Solyc02g083900.2.1	738	-64.94	Serine/threonine-protein kinase TEL1 (AHRD V1 *--- ATM_CANGA); contains Interpro domain(s) IPR003151 PIK-related kinase, FAT
7_1754_218(+)	Solyc01g106770.2.1	745	-66.45	Serine/threonine-protein kinase TEL1 (AHRD V1 *-** ATM_ASHGO); contains Interpro domain(s) IPR003151 PIK-related kinase, FAT
7_1754_218(+)	Solyc11g011090.1.1	880	-73.82	Tir-nbs-lrr, resistance protein
7_1754_218(+)	Solyc04g056570.2.1	599	-60.55	Tir-nbs-lrr, resistance protein
7_1754_92(+)	Solyc02g072520.2.1	565	-55.28	Receptor like kinase, RLK
8_2337_173(-)	Solyc07g055810.2.1	578	-59.68	Receptor like kinase, RLK
8_2337_173(-)	Solyc07g055640.1.1	852	-61.5	Receptor-like kinase (AHRD V1 *-*- B6EB06_NICGU); contains Interpro domain(s) IPR002290 Serine/threonine protein kinase
8_2337_238(+)	Solyc03g083590.2.1	714	-59.94	Protein serine/threonine kinase (AHRD V1 *-** D3BAM4_POLPA); contains Interpro domain(s) IPR002290 Serine/threonine protein kinase
8_2337_259(+)	Solyc07g042260.2.1	735	-87.39	Auxin response factor 1 (AHRD V1 *-*- Q6L8U3_CUCSA); contains Interpro domain(s) IPR010525 Auxin response factor
8_2337_322(+)	Solyc01g102300.2.1	599	-81.3	BHLH transcription factor (AHRD V1 *-** B6TXR4_MAIZE); contains Interpro domain(s) IPR011598 Helix-loop-helix DNA-binding
8_2337_322(+)	Solyc04g008130.1.1	574	-64.41	Cc-nbs-lrr, resistance protein
8_2337_322(+)	Solyc03g118530.2.1	595	-73.91	Protein serine/threonine kinase (AHRD V1 *-*- D3BAM4_POLPA); contains Interpro domain(s) IPR002290 Serine/threonine protein kinase
8_2337_322(+)	Solyc08g075600.1.1	869	-98.43	Receptor like kinase, RLK
8_2337_322(+)	Solyc09g007110.2.1	720	-85.33	Receptor like kinase, RLK
8_2337_322(+)	Solyc04g009640.2.1	610	-82.24	Receptor like kinase, RLK
8_2337_322(+)	Solyc03g006030.2.1	594	-62.9	Receptor like kinase, RLK
8_2337_322(+)	Solyc03g006100.2.1	584	-68.17	Receptor like kinase, RLK
8_2337_322(+)	Solyc02g023950.2.1	578	-74.45	Receptor like kinase, RLK
8_2337_322(+)	Solyc02g086270.2.1	749	-91.08	Receptor-like kinase (AHRD V1 *-*- A7VM25_MARPO); contains Interpro domain(s) IPR002290 Serine/threonine protein kinase
8_2337_322(+)	Solyc05g010140.2.1	586	-94.12	Receptor-like protein kinase At5g59670 (AHRD V1 *-*- RLK7_ARATH); contains Interpro domain(s) IPR002290 Serine/threonine protein kinase
8_2337_322(+)	Solyc02g031910.2.1	581	-82.55	Serine/threonine protein kinase (AHRD V1 *-** C4PKQ3_PRUPE); contains Interpro domain(s) IPR002290 Serine/threonine protein kinase
8_2337_322(+)	Solyc02g031860.2.1	573	-78.34	Serine/threonine protein kinase (AHRD V1 *-** C4PKQ3_PRUPE); contains Interpro domain(s) IPR002290 Serine/threonine protein kinase
8_2337_322(+)	Solyc01g111870.1.1	712	-76.47	Serine/threonine-protein kinase (AHRD V1 *-** D2V0W7_NAEGR); contains Interpro domain(s) IPR000403 Phosphatidylinositol 3- and 4-kinase, catalytic
8_2337_322(+)	Solyc02g083900.2.1	717	-74.36	Serine/threonine-protein kinase TEL1 (AHRD V1 *--- ATM_CANGA); contains Interpro domain(s) IPR003151 PIK-related kinase, FAT
8_2337_322(+)	Solyc11g011090.1.1	906	-116.69	Tir-nbs-lrr, resistance protein
8_2337_322(+)	Solyc05g007850.1.1	735	-92.98	Tir-nbs-lrr, resistance protein
8_2337_322(+)	Solyc11g011350.1.1	590	-74.67	Tir-nbs-lrr, resistance protein
8_2337_341(-)	Solyc01g007130.2.1	729	-58.37	Receptor like kinase, RLK
8_2337_341(-)	Solyc11g005630.1.1	615	-58.6	Receptor-like protein kinase (AHRD V1 ***- Q39202_ARATH); contains Interpro domain(s) IPR002290 Serine/threonine protein kinase
8_2337_406(+)	Solyc04g008120.1.1	595	-56.29	Cc-nbs-lrr, resistance protein
8_2337_406(+)	Solyc02g082310.1.1	571	-63.05	Receptor-like kinase (AHRD V1 *-*- A7VM55_9VIRI); contains Interpro domain(s) IPR002290 Serine/threonine protein kinase
8_2337_616(+)	Solyc07g049180.2.1	719	-53.98	Receptor-like protein kinase At5g59670 (AHRD V1 *-** RLK7_ARATH); contains Interpro domain(s) IPR002290 Serine/threonine protein kinase
8_2915_331(+)	Solyc05g054010.2.1	876	-79.89	Cc-nbs-lrr, resistance protein
8_2915_331(+)	Solyc05g050430.1.1	875	-73.08	Cc-nbs-lrr, resistance protein
8_2915_331(+)	Solyc05g054020.1.1	869	-69.5	Cc-nbs-lrr, resistance protein
8_2915_331(+)	Solyc05g047700.1.1	723	-59.88	Cc-nbs-lrr, resistance protein
8_2915_331(+)	Solyc03g019980.1.1	609	-55.81	Receptor like kinase, RLK
8_303_452(+)	Solyc03g025170.1.1	713	-68.55	GRAS family transcription factor (AHRD V1 **-* B9H3H7_POPTR); contains Interpro domain(s) IPR005202 GRAS transcription factor
8_303_452(+)	Solyc03g006080.2.1	741	-65.95	Receptor like kinase, RLK
8_303_452(+)	Solyc02g072470.2.1	603	-59.02	Receptor like kinase, RLK
8_303_452(+)	Solyc08g075590.1.1	574	-58.72	Receptor like kinase, RLK
8_303_452(+)	Solyc02g086270.2.1	745	-74.84	Receptor-like kinase (AHRD V1 *-*- A7VM25_MARPO); contains Interpro domain(s) IPR002290 Serine/threonine protein kinase
8_303_452(+)	Solyc08g013940.2.1	590	-52.66	Serine/threonine protein kinase (AHRD V1 *-** D0NGF5_PHYIN); contains Interpro domain(s) IPR002290 Serine/threonine protein kinase
8_303_452(+)	Solyc06g054480.2.1	611	-73.35	Serine/threonine protein kinase-like (AHRD V1 **** Q9FGC3_ARATH); contains Interpro domain(s) IPR002290 Serine/threonine protein kinase
8_773_223(-)	Solyc06g008400.1.1	585	-59.83	Cc-nbs-lrr, resistance protein
8_773_223(-)	Solyc02g083900.2.1	750	-66.9	Serine/threonine-protein kinase TEL1 (AHRD V1 *--- ATM_CANGA); contains Interpro domain(s) IPR003151 PIK-related kinase, FAT
8_773_223(-)	Solyc01g102880.1.1	587	-55.91	Tir-nbs-lrr, resistance protein
8_773_246(+)	Solyc05g047700.1.1	718	-67.31	Cc-nbs-lrr, resistance protein
8_773_246(+)	Solyc04g008120.1.1	594	-57.29	Cc-nbs-lrr, resistance protein
8_773_246(+)	Solyc05g054020.1.1	580	-62.83	Cc-nbs-lrr, resistance protein
8_773_246(+)	Solyc05g043420.1.1	579	-62.11	Cc-nbs-lrr, resistance protein
8_773_246(+)	Solyc05g053990.2.1	570	-64.97	Cc-nbs-lrr, resistance protein
8_773_246(+)	Solyc05g054010.2.1	570	-64.97	Cc-nbs-lrr, resistance protein
8_773_246(+)	Solyc05g050430.1.1	567	-59.53	Cc-nbs-lrr, resistance protein
8_773_246(+)	Solyc01g059860.2.1	589	-52.24	Kinase family protein (AHRD V1 ***- D7L5X4_ARALY); contains Interpro domain(s) IPR002290 Serine/threonine protein kinase
8_773_246(+)	Solyc09g063040.1.1	573	-59.7	Nbs-lrr, resistance protein
8_773_246(+)	Solyc03g044160.1.1	590	-60.32	Pto-like, Serine/threonine kinase protein, resistance protein
9_1348_8147(-)	Solyc05g007170.2.1	582	-50.09	Cc-nbs-lrr, resistance protein with an R1 specific domain
9_1348_8170(+)	Solyc08g007630.1.1	599	-59.81	Cc-nbs-lrr, resistance protein
9_1348_8170(+)	Solyc05g047700.1.1	589	-52.41	Cc-nbs-lrr, resistance protein
9_1348_8170(+)	Solyc01g088060.2.1	582	-83.51	Nbs-lrr, resistance protein
9_1348_8170(+)	Solyc01g111870.1.1	738	-64.93	Serine/threonine-protein kinase (AHRD V1 *-** D2V0W7_NAEGR); contains Interpro domain(s) IPR000403 Phosphatidylinositol 3- and 4-kinase, catalytic
9_1348_8170(+)	Solyc11g011090.1.1	1943	-200.53	Tir-nbs-lrr, resistance protein
9_1348_8170(+)	Solyc01g008800.1.1	740	-74.76	Tir-nbs-lrr, resistance protein
9_1348_8170(+)	Solyc09g092410.2.1	574	-67.09	Tir-nbs-lrr, resistance protein
9_1348_8212(+)	Solyc04g081240.2.1	589	-63.99	Auxin response factor 5 (AHRD V1 ***- D9IVB5_SOLLC); contains Interpro domain(s) IPR010525 Auxin response factor
9_1348_8212(+)	Solyc05g007170.2.1	738	-78.27	Cc-nbs-lrr, resistance protein with an R1 specific domain
9_1348_8212(+)	Solyc01g102700.2.1	598	-68.28	Receptor like kinase, RLK
9_1348_8212(+)	Solyc01g111870.1.1	737	-84.8	Serine/threonine-protein kinase (AHRD V1 *-** D2V0W7_NAEGR); contains Interpro domain(s) IPR000403 Phosphatidylinositol 3- and 4-kinase, catalytic
9_1348_8212(+)	Solyc02g083900.2.1	717	-72.01	Serine/threonine-protein kinase TEL1 (AHRD V1 *--- ATM_CANGA); contains Interpro domain(s) IPR003151 PIK-related kinase, FAT
9_1348_8357(-)	Solyc07g016180.2.1	738	-80.76	Auxin response factor 19 (AHRD V1 ***- D9IA29_SOLLC); contains Interpro domain(s) IPR010525 Auxin response factor
9_1348_8357(-)	Solyc06g065100.2.1	575	-58.15	Myb-like transcription factor 1 (AHRD V1 **** Q8H271_GOSHI); contains Interpro domain(s) IPR015495 Myb transcription factor
9_1348_8357(-)	Solyc03g098400.1.1	926	-128.61	Receptor like kinase, RLK
9_1348_8357(-)	Solyc03g019980.1.1	902	-108.85	Receptor like kinase, RLK
9_1348_8357(-)	Solyc09g072810.2.1	730	-84.97	Receptor like kinase, RLK
9_1348_8357(-)	Solyc02g084370.1.1	591	-70.04	Receptor like kinase, RLK
9_1348_8357(-)	Solyc12g098100.1.1	585	-63.97	Receptor like kinase, RLK
9_1348_8357(-)	Solyc03g006030.2.1	581	-67.69	Receptor like kinase, RLK
9_1348_8357(-)	Solyc11g017280.1.1	580	-71.53	Receptor like kinase, RLK
9_1348_8357(-)	Solyc07g006770.2.1	574	-53.13	Receptor like kinase, RLK
9_1348_8357(-)	Solyc11g017270.1.1	572	-64.74	Receptor like kinase, RLK
9_1348_8441(-)	Solyc05g054010.2.1	715	-74.54	Cc-nbs-lrr, resistance protein
9_1348_8441(-)	Solyc05g043420.1.1	599	-58.75	Cc-nbs-lrr, resistance protein
9_1348_8441(-)	Solyc05g047700.1.1	587	-56.88	Cc-nbs-lrr, resistance protein
9_1348_8441(-)	Solyc05g053990.2.1	572	-56.25	Cc-nbs-lrr, resistance protein
9_1348_8441(-)	Solyc05g050430.1.1	571	-61.62	Cc-nbs-lrr, resistance protein
9_1348_8441(-)	Solyc05g005330.2.1	766	-65.74	Cc-nbs-lrr, resistance protein with an R1 specific domain
9_1348_8441(-)	Solyc08g075600.1.1	584	-51.08	Receptor like kinase, RLK
9_1348_8443(+)	Solyc07g049700.1.1	750	-59.78	Cc-nbs-lrr, resistance protein
9_1348_8443(+)	Solyc11g071430.1.1	626	-54.64	Cc-nbs-lrr, resistance protein
9_1348_8443(+)	Solyc11g069620.1.1	609	-55.99	Cc-nbs-lrr, resistance protein
9_1348_8443(+)	Solyc05g007610.2.1	610	-56.97	Cc-nbs-lrr, resistance protein with an R1 specific domain
9_1348_8443(+)	Solyc05g013280.2.1	596	-59.45	Cc-nbs-lrr, resistance protein with an R1 specific domain
9_1348_8443(+)	Solyc12g049320.1.1	574	-50.76	GRAS family transcription factor (AHRD V1 **-- Q4VYC3_POPTR); contains Interpro domain(s) IPR005202 GRAS transcription factor
9_1348_8443(+)	Solyc04g015980.2.1	598	-56.24	Receptor like kinase, RLK
9_1348_8443(+)	Solyc06g082470.2.1	581	-51.74	Serine/threonine protein kinase (AHRD V1 *-** D0NNA3_PHYIN); contains Interpro domain(s) IPR002290 Serine/threonine protein kinase
9_1348_8443(+)	Solyc06g071490.1.1	573	-54.06	Serine/threonine-protein kinase ATM (AHRD V1 *--- ATM_ARATH); contains Interpro domain(s) IPR000313 PWWP
9_1348_8443(+)	Solyc01g108920.2.1	594	-57.57	Serine/threonine-protein kinase Sgk3 (AHRD V1 *--- SGK3_RAT); contains Interpro domain(s) IPR001683 Phox-like
9_1348_8443(+)	Solyc05g007850.1.1	591	-52.67	Tir-nbs-lrr, resistance protein
9_1750_102(+)	Solyc11g071430.1.1	572	-65.17	Cc-nbs-lrr, resistance protein
9_1750_102(+)	Solyc01g103530.2.1	590	-57.49	Receptor like kinase, RLK
1_1364_186(+)	Solyc01g110700.2.1	2068	-224.82	Unknown Protein (AHRD V1)
1_1364_186(+)	Solyc01g111180.2.1	1629	-183.17	Unknown Protein (AHRD V1)
1_1364_186(+)	Solyc03g013530.1.1	586	-57.05	Unknown Protein (AHRD V1)
1_1364_186(+)	Solyc02g084270.1.1	584	-52.74	Unknown Protein (AHRD V1)
1_1364_205(-)	Solyc04g015970.2.1	575	-57.72	ATP-binding cassette 1 (AHRD V1 *-*- Q80ZB2_RAT); contains Interpro domain(s) IPR003439 ABC transporter-like
1_1364_205(-)	Solyc05g055330.2.1	569	-62	ATP-binding cassette transporter (AHRD V1 ***- D8RL77_SELML); contains Interpro domain(s) IPR013525 ABC-2 type transporter
1_1364_205(-)	Solyc11g069190.1.1	525	-79.11	Auxin response factor 4 (AHRD V1 **** Q2LAI9_SOLLC); contains Interpro domain(s) IPR011525 Aux/IAA-ARF-dimerisation IPR003340 Transcriptional factor B3
1_1364_205(-)	Solyc04g080980.2.1	859	-90.19	Coatomer alpha subunit-like protein (AHRD V1 **-- Q70I39_LOTJA); contains Interpro domain(s) IPR016391 Coatomer, alpha subunit
1_1364_205(-)	Solyc07g049720.2.1	572	-53.2	DNA topoisomerase I (AHRD V1 **** Q9XGL1_DAUCA); contains Interpro domain(s) IPR013499 DNA topoisomerase I, C-terminal, eukaryotic-type
1_1364_205(-)	Solyc07g066200.2.1	609	-55.56	Genomic DNA chromosome 5 TAC clone K24C1 (AHRD V1 *-*- Q9FH15_ARATH)
1_1364_205(-)	Solyc05g053890.1.1	596	-52.08	Glucosyltransferase-like protein (AHRD V1 *-** Q9LXV0_ARATH); contains Interpro domain(s) IPR002213 UDP-glucuronosyl/UDP-glucosyltransferase
1_1364_205(-)	Solyc10g079510.1.1	762	-86.05	Helicase-like protein (AHRD V1 *-*- Q383Z6_9TRYP); contains Interpro domain(s) IPR013020 DNA helicase (DNA repair), Rad3 type
1_1364_205(-)	Solyc07g053610.2.1	732	-85.74	Homeobox protein (AHRD V1 *--- D6BV21_ORYSJ); contains Interpro domain(s) IPR018500 DDT subgroup
1_1364_205(-)	Solyc10g051110.1.1	568	-65.89	NAD dependent epimerase/dehydratase family protein (AHRD V1 *--- B0CAN3_ACAM1); contains Interpro domain(s) IPR016040 NAD(P)-binding domain
1_1364_205(-)	Solyc03g082680.2.1	599	-62.34	Neuroblastoma-amplified protein-like protein (AHRD V1 *-*- D2V0U7_NAEGR); contains Interpro domain(s) IPR011046 WD40 repeat-like
1_1364_205(-)	Solyc03g083590.2.1	583	-63.27	Protein serine/threonine kinase (AHRD V1 *-** D3BAM4_POLPA); contains Interpro domain(s) IPR002290 Serine/threonine protein kinase
1_1364_205(-)	Solyc03g117550.1.1	578	-66.74	Receptor protein kinase-like (AHRD V1 *-*- Q5JN26_ORYSJ); contains Interpro domain(s) IPR002290 Serine/threonine protein kinase
1_1364_205(-)	Solyc08g081980.2.1	593	-55.74	Serine/threonine-protein kinase A-Raf (AHRD V1 *-** ARAF_PIG); contains Interpro domain(s) IPR010632 Protein of unknown function DUF1221
1_1364_205(-)	Solyc07g053790.1.1	590	-73.28	Targeting protein for Xklp2 containing protein expressed (AHRD V1 *--- Q10Q22_ORYSJ); contains Interpro domain(s) IPR009675 Targeting for Xklp2
1_1364_205(-)	Solyc01g110700.2.1	3668	-328.95	Unknown Protein (AHRD V1)
1_1364_205(-)	Solyc01g111180.2.1	2941	-262.45	Unknown Protein (AHRD V1)
1_1364_205(-)	Solyc05g013490.2.1	571	-64.61	Unknown Protein (AHRD V1)
1_1364_205(-)	Solyc08g077500.2.1	585	-58.61	Vacuolar protein sorting-associated protein (AHRD V1 *-*- D3BBX0_POLPA); contains Interpro domain(s) IPR001849 Pleckstrin homology
1_1364_226(-)	Solyc04g015970.2.1	575	-57.72	ATP-binding cassette 1 (AHRD V1 *-*- Q80ZB2_RAT); contains Interpro domain(s) IPR003439 ABC transporter-like
1_1364_226(-)	Solyc05g055330.2.1	569	-58.78	ATP-binding cassette transporter (AHRD V1 ***- D8RL77_SELML); contains Interpro domain(s) IPR013525 ABC-2 type transporter
1_1364_226(-)	Solyc11g069190.1.1	525	-82.63	Auxin response factor 4 (AHRD V1 **** Q2LAI9_SOLLC); contains Interpro domain(s) IPR011525 Aux/IAA-ARF-dimerisation IPR003340 Transcriptional factor B3
1_1364_226(-)	Solyc04g080980.2.1	859	-92.31	Coatomer alpha subunit-like protein (AHRD V1 **-- Q70I39_LOTJA); contains Interpro domain(s) IPR016391 Coatomer, alpha subunit
1_1364_226(-)	Solyc07g049720.2.1	572	-53.2	DNA topoisomerase I (AHRD V1 **** Q9XGL1_DAUCA); contains Interpro domain(s) IPR013499 DNA topoisomerase I, C-terminal, eukaryotic-type
1_1364_226(-)	Solyc07g066200.2.1	609	-57.22	Genomic DNA chromosome 5 TAC clone K24C1 (AHRD V1 *-*- Q9FH15_ARATH)
1_1364_226(-)	Solyc05g053890.1.1	596	-52.08	Glucosyltransferase-like protein (AHRD V1 *-** Q9LXV0_ARATH); contains Interpro domain(s) IPR002213 UDP-glucuronosyl/UDP-glucosyltransferase
1_1364_226(-)	Solyc10g079510.1.1	762	-85.49	Helicase-like protein (AHRD V1 *-*- Q383Z6_9TRYP); contains Interpro domain(s) IPR013020 DNA helicase (DNA repair), Rad3 type
1_1364_226(-)	Solyc07g053610.2.1	732	-81.52	Homeobox protein (AHRD V1 *--- D6BV21_ORYSJ); contains Interpro domain(s) IPR018500 DDT subgroup
1_1364_226(-)	Solyc10g051110.1.1	568	-59.46	NAD dependent epimerase/dehydratase family protein (AHRD V1 *--- B0CAN3_ACAM1); contains Interpro domain(s) IPR016040 NAD(P)-binding domain
1_1364_226(-)	Solyc03g082680.2.1	599	-62.07	Neuroblastoma-amplified protein-like protein (AHRD V1 *-*- D2V0U7_NAEGR); contains Interpro domain(s) IPR011046 WD40 repeat-like
1_1364_226(-)	Solyc03g083590.2.1	583	-63.26	Protein serine/threonine kinase (AHRD V1 *-** D3BAM4_POLPA); contains Interpro domain(s) IPR002290 Serine/threonine protein kinase
1_1364_226(-)	Solyc03g117550.1.1	578	-58.65	Receptor protein kinase-like (AHRD V1 *-*- Q5JN26_ORYSJ); contains Interpro domain(s) IPR002290 Serine/threonine protein kinase
1_1364_226(-)	Solyc08g081980.2.1	593	-59.17	Serine/threonine-protein kinase A-Raf (AHRD V1 *-** ARAF_PIG); contains Interpro domain(s) IPR010632 Protein of unknown function DUF1221
1_1364_226(-)	Solyc07g053790.1.1	590	-73.4	Targeting protein for Xklp2 containing protein expressed (AHRD V1 *--- Q10Q22_ORYSJ); contains Interpro domain(s) IPR009675 Targeting for Xklp2
1_1364_226(-)	Solyc01g110700.2.1	3668	-330.84	Unknown Protein (AHRD V1)
1_1364_226(-)	Solyc01g111180.2.1	2941	-264.34	Unknown Protein (AHRD V1)
1_1364_226(-)	Solyc05g013490.2.1	571	-64.1	Unknown Protein (AHRD V1)
1_1364_226(-)	Solyc08g077500.2.1	585	-58.52	Vacuolar protein sorting-associated protein (AHRD V1 *-*- D3BBX0_POLPA); contains Interpro domain(s) IPR001849 Pleckstrin homology
1_1364_249(+)	Solyc09g065700.2.1	745	-104	Beige/BEACH domain containing protein (AHRD V1 *--- A8PYX1_BRUMA); contains Interpro domain(s) IPR000409 Beige/BEACH
1_1364_249(+)	Solyc11g008340.1.1	602	-80.57	Exocyst complex component 4 (AHRD V1 *-*- B0W348_CULQU); contains Interpro domain(s) IPR007191 Sec8 exocyst complex component specific domain
1_1364_249(+)	Solyc07g054980.1.1	1318	-198.02	Myb-related transcription factor (AHRD V1 *--- B5RHV2_MUSBA); contains Interpro domain(s) IPR015495 Myb transcription factor
1_1364_249(+)	Solyc02g090230.2.1	589	-81.78	Nucleoporin p58/p45 (AHRD V1 ***- B4FHB0_MAIZE)
1_1364_249(+)	Solyc01g110700.2.1	3239	-414.43	Unknown Protein (AHRD V1)
1_1364_249(+)	Solyc01g111180.2.1	2931	-369	Unknown Protein (AHRD V1)
1_1364_249(+)	Solyc01g080440.1.1	999	-156.45	Unknown Protein (AHRD V1)
1_276_220(+)	Solyc01g008350.2.1	722	-111.01	DNAJ heat shock N-terminal domain-containing protein-like (AHRD V1 ***- Q5QMD6_ORYSJ)
1_276_220(+)	Solyc02g089260.2.1	573	-79.79	E3 ubiquitin-protein ligase UBR4 (AHRD V1 *--- UBR4_HUMAN); contains Interpro domain(s) IPR013993 Zinc finger, N-recognin, metazoa
1_276_220(+)	Solyc01g094620.2.1	614	-94.67	Mediator of RNA polymerase II transcription subunit 12 (AHRD V1 *--- B2G3S6_ZYGRO); contains Interpro domain(s) IPR019035 Mediator complex, subunit Med12
1_276_220(+)	Solyc02g090760.2.1	590	-77.7	Os03g0395600 protein (Fragment) (AHRD V1 *-*- Q0DRD1_ORYSJ)
1_276_220(+)	Solyc01g081320.2.1	582	-67.03	Pentatricopeptide repeat-containing protein (AHRD V1 ***- D7M643_ARALY); contains Interpro domain(s) IPR002885 Pentatricopeptide repeat
1_276_220(+)	Solyc01g111180.2.1	856	-99.58	Unknown Protein (AHRD V1)
1_276_220(+)	Solyc01g110700.2.1	709	-81.8	Unknown Protein (AHRD V1)
1_276_220(+)	Solyc06g069440.2.1	586	-79.06	Zinc finger CCCH domain-containing protein 55 (AHRD V1 *-*- C3H55_ORYSJ)
1_276_577(+)	Solyc07g005480.2.1	577	-92.13	Formin 2B (AHRD V1 *-*- C7BGM9_PHYPA); contains Interpro domain(s) IPR015425 Actin-binding FH2
1_276_577(+)	Solyc04g072260.1.1	581	-94.17	Midasin (AHRD V1 ***- B9MXW7_POPTR); contains Interpro domain(s) IPR012099 Midasin
1_276_577(+)	Solyc12g098780.1.1	579	-97.01	Pistil extensin like protein (Fragment) (AHRD V1 *-*- Q40552_TOBAC); contains Interpro domain(s) IPR006041 Pollen Ole e 1 allergen and extensin
1_276_577(+)	Solyc01g110040.2.1	585	-83.11	Transducin family protein (AHRD V1 ***- D7L1V6_ARALY)
1_276_577(+)	Solyc01g110700.2.1	850	-120.27	Unknown Protein (AHRD V1)
1_276_577(+)	Solyc01g111180.2.1	708	-103.09	Unknown Protein (AHRD V1)
1_276_577(+)	Solyc04g071080.1.1	987	-157.72	Unknown Protein (AHRD V1); contains Interpro domain(s) IPR006706 Extensin-like region
1_276_724(+)	Solyc06g010220.1.1	600	-93.08	Chromodomain helicase DNA binding protein 3 (Fragment) (AHRD V1 *--- B1AR16_MOUSE); contains Interpro domain(s) IPR019787 Zinc finger, PHD-finger
1_276_724(+)	Solyc05g017890.2.1	583	-83.79	THO complex subunit 2 (AHRD V1 *-*- B0XJB9_CULQU)
1_276_724(+)	Solyc01g110700.2.1	725	-81.91	Unknown Protein (AHRD V1)
1_3182_143(+)	Solyc06g074960.2.1	584	-84.13	ABC transporter G family member 3 (AHRD V1 *--- AB3G_ARATH); contains Interpro domain(s) IPR000374 Phosphatidate cytidylyltransferase
1_3182_143(+)	Solyc03g115250.2.1	599	-80.49	Genomic DNA chromosome 5 P1 clone MXM12 (AHRD V1 *-*- Q9SD86_ARATH)
1_3182_143(+)	Solyc06g069500.2.1	577	-76	Genomic DNA chromosome 5 P1 clone MXM12 (AHRD V1 *-*- Q9SD86_ARATH)
1_3182_143(+)	Solyc04g016080.1.1	868	-129.79	Kinesin-like protein (AHRD V1 *-*- Q9SS42_ARATH); contains Interpro domain(s) IPR001752 Kinesin, motor region
1_3182_143(+)	Solyc01g080360.2.1	575	-93.47	MHD domain-containing death-inducing protein (AHRD V1 *--- MUDEN_HUMAN); contains Interpro domain(s) IPR008968 Clathrin adaptor, mu subunit, C-terminal
1_3182_143(+)	Solyc02g078640.2.1	726	-99.94	Microtubule associated protein (AHRD V1 *--* A8J2Q6_CHLRE); contains Interpro domain(s) IPR011989 Armadillo-like helical
1_3182_143(+)	Solyc01g109080.2.1	567	-83.68	Protein kinase (AHRD V1 *-*- D3AX52_POLPA); contains Interpro domain(s) IPR000403 Phosphatidylinositol 3- and 4-kinase, catalytic
1_3182_143(+)	Solyc01g110700.2.1	2478	-387.39	Unknown Protein (AHRD V1)
1_3182_143(+)	Solyc01g111180.2.1	2044	-306.56	Unknown Protein (AHRD V1)
1_3182_143(+)	Solyc01g098120.2.1	603	-89.18	Unknown Protein (AHRD V1)
1_3182_143(+)	Solyc08g077500.2.1	578	-80.42	Vacuolar protein sorting-associated protein (AHRD V1 *-*- D3BBX0_POLPA); contains Interpro domain(s) IPR001849 Pleckstrin homology
1_3183_303(+)	Solyc03g020020.2.1	588	-52.18	AT3G05680-like protein (Fragment) (AHRD V1 *-*- D6PPW0_9BRAS)
1_3183_303(+)	Solyc01g106230.2.1	1441	-79.27	B3 domain-containing protein At5g60142 (AHRD V1 *-*- Y5142_ARATH); contains Interpro domain(s) IPR003340 Transcriptional factor B3
1_3183_303(+)	Solyc08g082970.2.1	577	-56.97	Fas-associated factor 1-like protein (AHRD V1 **-- Q5DJU1_CAPAN); contains Interpro domain(s) IPR006577 UAS
1_3183_303(+)	Solyc01g111080.2.1	1489	-122.52	Gibberellin-regulated protein 2 (AHRD V1 *--- B6UGG6_MAIZE); contains Interpro domain(s) IPR003854 Gibberellin regulated protein
1_3183_303(+)	Solyc02g065500.2.1	735	-50.37	Nucleolar pre-ribosomal-associated protein 1 (AHRD V1 *--- NPA1P_HUMAN)
1_3183_303(+)	Solyc10g083810.1.1	603	-57.97	Pectinesterase (AHRD V1 ***- B9MTJ5_POPTR); contains Interpro domain(s) IPR000070 Pectinesterase, catalytic
1_3183_303(+)	Solyc01g109080.2.1	606	-57.03	Protein kinase (AHRD V1 *-*- D3AX52_POLPA); contains Interpro domain(s) IPR000403 Phosphatidylinositol 3- and 4-kinase, catalytic
1_3183_303(+)	Solyc10g005160.1.1	594	-50.5	Purine permease (AHRD V1 **-* B6TET5_MAIZE); contains Interpro domain(s) IPR004853 Protein of unknown function DUF250
1_3183_303(+)	Solyc01g111440.2.1	884	-58.48	Senescence-associated protein 12 (AHRD V1 *-*- O81657_HEMSP); contains Interpro domain(s) IPR009686 Senescence-associated
1_3183_303(+)	Solyc01g106940.2.1	730	-65.92	Single myb histone 4 (Fragment) (AHRD V1 *--- A6MZD9_ORYSI); contains Interpro domain(s) IPR005818 Histone H1/H5
1_3183_303(+)	Solyc07g063440.2.1	589	-52.23	Trafficking protein particle complex subunit 10 (AHRD V1 *--- D3BI54_POLPA)
1_3183_303(+)	Solyc01g110040.2.1	1024	-68.86	Transducin family protein (AHRD V1 ***- D7L1V6_ARALY)
1_3183_303(+)	Solyc01g110700.2.1	12381	-866.43	Unknown Protein (AHRD V1)
1_3183_303(+)	Solyc01g111180.2.1	12298	-875.15	Unknown Protein (AHRD V1)
1_3183_303(+)	Solyc06g019160.1.1	750	-54.11	Unknown Protein (AHRD V1)
1_3183_324(+)	Solyc09g042750.2.1	599	-73.46	Acyl-CoA thioesterase 9 (AHRD V1 **** Q503Q9_DANRE)
1_3183_324(+)	Solyc08g066960.2.1	582	-70.45	Boron transporter 2 (AHRD V1 **-* A8WCD9_WHEAT); contains Interpro domain(s) IPR003020 Bicarbonate transporter, eukaryotic
1_3183_324(+)	Solyc12g100270.1.1	603	-64.23	CER1 (AHRD V1 **-- B6TFH3_MAIZE); contains Interpro domain(s) IPR006694 Fatty acid hydroxylase
1_3183_324(+)	Solyc02g038670.1.1	992	-93.52	Methyl-accepting chemotaxis sensory transducer (AHRD V1 *--- A6M112_CLOB8); contains Interpro domain(s) IPR011990 Tetratricopeptide-like helical
1_3183_324(+)	Solyc02g077300.1.1	605	-74.79	Peroxidase 73 (AHRD V1 **** B6U0T8_MAIZE); contains Interpro domain(s) IPR002016 Haem peroxidase, plant/fungal/bacterial
1_3183_324(+)	Solyc03g119780.2.1	596	-72.17	Transcription initiation factor TFIID subunit (AHRD V1 *--- C7G081_DICDI); contains Interpro domain(s) IPR014782 Peptidase M1, membrane alanine aminopeptidase, N-terminal
1_3183_324(+)	Solyc10g006480.1.1	728	-93.36	Ubiquitin (AHRD V1 ***- Q39257_PEA); contains Interpro domain(s) IPR019956 Ubiquitin subgroup
1_3183_324(+)	Solyc07g064130.1.1	592	-81.17	Ubiquitin (AHRD V1 ***- Q39257_PEA); contains Interpro domain(s) IPR019956 Ubiquitin subgroup
1_3183_324(+)	Solyc01g110700.2.1	2793	-325.01	Unknown Protein (AHRD V1)
1_3183_324(+)	Solyc01g111180.2.1	2639	-299.62	Unknown Protein (AHRD V1)
1_3183_324(+)	Solyc01g060150.2.1	594	-65.04	Unknown Protein (AHRD V1)
1_3183_324(+)	Solyc11g071610.1.1	578	-76.49	Xanthine dehydrogenase/oxidase (AHRD V1 ***- A9YL93_RABIT); contains Interpro domain(s) IPR016208 Aldehyde oxidase/xanthine dehydrogenase
1_541_113(-)	Solyc07g007930.2.1	596	-78.57	Alkaline alpha galactosidase 2 (AHRD V1 **-- Q575Z7_MAIZE); contains Interpro domain(s) IPR008811 Raffinose synthase
1_541_113(-)	Solyc02g089370.2.1	597	-67.98	Cell morphogenesis protein (AHRD V1 *--- C0NPN9_AJECG)
1_541_113(-)	Solyc09g072820.2.1	602	-67.35	Cellulose synthase (AHRD V1 **** B8XPP6_9ROSI); contains Interpro domain(s) IPR005150 Cellulose synthase
1_541_113(-)	Solyc11g066780.1.1	723	-79.23	Chromodomain helicase DNA binding protein 3 (Fragment) (AHRD V1 *--- B1AR16_MOUSE); contains Interpro domain(s) IPR018500 DDT subgroup
1_541_113(-)	Solyc03g071550.1.1	597	-58.44	Chromodomain helicase DNA binding protein 3 (Fragment) (AHRD V1 *--* B1AR16_MOUSE); contains Interpro domain(s) IPR019787 Zinc finger, PHD-finger
1_541_113(-)	Solyc02g089260.2.1	726	-84.47	E3 ubiquitin-protein ligase UBR4 (AHRD V1 *--- UBR4_HUMAN); contains Interpro domain(s) IPR013993 Zinc finger, N-recognin, metazoa
1_541_113(-)	Solyc08g061650.2.1	942	-111.83	F-box/LRR-repeat protein 14 (AHRD V1 *-*- B5X1Y2_SALSA); contains Interpro domain(s) IPR006553 Leucine-rich repeat, cysteine-containing subtype
1_541_113(-)	Solyc09g056170.2.1	594	-55.81	Fimbrin-like potential actin filament bundling protein (AHRD V1 *--* Q5AC06_CANAL); contains Interpro domain(s) IPR016146 Calponin-homology
1_541_113(-)	Solyc02g014190.2.1	603	-59.66	Genomic DNA chromosome 5 P1 clone MYJ24 (AHRD V1 **-- Q9FN44_ARATH); contains Interpro domain(s) IPR003594 ATP-binding region, ATPase-like
1_541_113(-)	Solyc03g083440.2.1	748	-74.75	Glutamate synthase (AHRD V1 **** C1E4G5_9CHLO); contains Interpro domain(s) IPR012220 Glutamate synthase, eukaryotic IPR006005 Glutamate synthase, NADH/NADPH, small subunit 1
1_541_113(-)	Solyc08g077430.2.1	593	-67.5	Glycine-rich protein (AHRD V1 ***- D7MQL9_ARALY)
1_541_113(-)	Solyc08g078200.1.1	595	-69.67	H-ATPase (AHRD V1 **** Q8L6I3_ORYSJ); contains Interpro domain(s) IPR006534 ATPase, P-type, plasma-membrane proton-efflux
1_541_113(-)	Solyc01g017850.1.1	578	-56.75	Helicase-like protein (AHRD V1 *-*- Q9AYF0_ORYSJ); contains Interpro domain(s) IPR010285 Protein of unknown function DUF889, eukaryote
1_541_113(-)	Solyc02g088720.2.1	721	-74.79	Heterogeneous nuclear ribonucleoprotein R (Fragment) (AHRD V1 *--- Q28BX1_XENTR); contains Interpro domain(s) IPR000504 RNA recognition motif, RNP-1
1_541_113(-)	Solyc07g052940.2.1	616	-55.56	Histone-lysine N-methyltransferase (AHRD V1 *-*- B6JWJ3_SCHJY); contains Interpro domain(s) IPR001214 SET
1_541_113(-)	Solyc04g076350.1.1	594	-62.77	Kinase interacting protein 1 (AHRD V1 *-*- Q94CG5_PETIN); contains Interpro domain(s) IPR011684 KIP1-like
1_541_113(-)	Solyc08g081000.2.1	587	-78.4	Lysine-specific demethylase 5D (AHRD V1 *--- KDM5D_MOUSE); contains Interpro domain(s) IPR013129 Transcription factor jumonji
1_541_113(-)	Solyc12g035670.1.1	612	-67.73	MCM3-associated protein (Fragment) (AHRD V1 *--- Q6DRP0_DANRE); contains Interpro domain(s) IPR005062 SAC3/GANP/Nin1/mts3/eIF-3 p25
1_541_113(-)	Solyc01g105330.2.1	569	-65.56	Methyl binding domain protein (AHRD V1 *-*- B9GUW9_POPTR); contains Interpro domain(s) IPR016177 DNA-binding, integrase-type
1_541_113(-)	Solyc11g013190.1.1	601	-65.32	Oxysterol-binding protein (AHRD V1 ***- A9ZM29_SOYBN); contains Interpro domain(s) IPR000648 Oxysterol-binding protein
1_541_113(-)	Solyc01g097670.2.1	605	-67.24	Pentatricopeptide repeat-containing protein (AHRD V1 ***- D7MHD4_ARALY); contains Interpro domain(s) IPR002885 Pentatricopeptide repeat
1_541_113(-)	Solyc03g116830.2.1	608	-65.82	Phox domain-containing protein (AHRD V1 ***- D7L4Y9_ARALY); contains Interpro domain(s) IPR001683 Phox-like
1_541_113(-)	Solyc05g051070.2.1	589	-63.97	Pre-mRNA-splicing factor ISY1 (AHRD V1 ***- B6T8I4_MAIZE); contains Interpro domain(s) IPR009360 Isy1-like splicing
1_541_113(-)	Solyc05g005020.2.1	600	-70.34	R1 protein alpha-glucan water dikinase (AHRD V1 **** A8I6T5_CHLRE); contains Interpro domain(s) IPR002192 Pyruvate phosphate dikinase, PEP/pyruvate-binding
1_541_113(-)	Solyc08g077310.2.1	591	-71.7	RNA-binding protein (AHRD V1 *--- C5JJR9_AJEDS); contains Interpro domain(s) IPR000504 RNA recognition motif, RNP-1
1_541_113(-)	Solyc01g068100.2.1	801	-105.03	Squamosa promoter binding protein-like 1 (AHRD V1 *-*- Q56YT3_ARATH); contains Interpro domain(s) IPR004333 Transcription factor, SBP-box
1_541_113(-)	Solyc02g063240.2.1	588	-58.98	Sterol C-5 desaturase (AHRD V1 **** D7FW86_ECTSI); contains Interpro domain(s) IPR006694 Fatty acid hydroxylase
1_541_113(-)	Solyc11g008150.1.1	920	-99.84	Transcription elongation factor spt5 (AHRD V1 *-*- B6JZQ2_SCHJY); contains Interpro domain(s) IPR005100 Supt5 repeat
1_541_113(-)	Solyc01g110700.2.1	2186	-225.38	Unknown Protein (AHRD V1)
1_541_113(-)	Solyc01g111180.2.1	2186	-225.38	Unknown Protein (AHRD V1)
1_541_113(-)	Solyc04g039640.2.1	1047	-107.38	Unknown Protein (AHRD V1)
1_541_113(-)	Solyc09g009370.2.1	728	-77.11	Vacuolar protein sorting-associated protein (AHRD V1 *-*- Q2UJU9_ASPOR); contains Interpro domain(s) IPR009291 Protein of unknown function DUF946, plant
1_541_113(-)	Solyc11g065920.1.1	575	-55.33	Xanthine dehydrogenase/oxidase (AHRD V1 ***- A9YL93_RABIT); contains Interpro domain(s) IPR016208 Aldehyde oxidase/xanthine dehydrogenase
1_541_113(-)	Solyc11g065930.1.1	575	-57.85	Xanthine dehydrogenase/oxidase (AHRD V1 ***- A9YL93_RABIT); contains Interpro domain(s) IPR016208 Aldehyde oxidase/xanthine dehydrogenase
1_541_115(+)	Solyc12g088230.1.1	1102	-136.62	Early-responsive to dehydration protein-like (AHRD V1 **-- Q5JKX1_ORYSJ); contains Interpro domain(s) IPR003864 Protein of unknown function DUF221
1_541_115(+)	Solyc12g088950.1.1	1036	-122.11	LRR receptor-like serine/threonine-protein kinase, RLP
1_541_115(+)	Solyc01g110700.2.1	3753	-408.48	Unknown Protein (AHRD V1)
1_541_115(+)	Solyc01g111180.2.1	3461	-376.89	Unknown Protein (AHRD V1)
1_541_115(+)	Solyc08g077500.2.1	586	-72.32	Vacuolar protein sorting-associated protein (AHRD V1 *-*- D3BBX0_POLPA); contains Interpro domain(s) IPR001849 Pleckstrin homology
1_541_134(-)	Solyc07g045170.2.1	741	-63.22	184 (Fragment) (AHRD V1 *-*- O80379_DAUCA)
1_541_134(-)	Solyc05g050010.2.1	588	-51.04	1-aminocyclopropane-1-carboxylate synthase (AHRD V1 **** Q659H5_SOLLC); contains Interpro domain(s) IPR004839 Aminotransferase, class I and II IPR004838 Aminotransferases, class-I, pyridoxal-phosphate-binding site
1_541_134(-)	Solyc12g098210.1.1	577	-51.59	ABC transporter G family member 40 (AHRD V1 ***- AB40G_ARATH); contains Interpro domain(s) IPR013525 ABC-2 type transporter
1_541_134(-)	Solyc12g088010.1.1	725	-54.67	Aberrant pollen transmission 1 (AHRD V1 **-- Q4JQG0_MAIZE); contains Interpro domain(s) IPR019443 Protein of unknown function FMP27, domain-6, C-terminal
1_541_134(-)	Solyc02g085520.2.1	718	-51.09	Adenylosuccinate synthetase, chloroplastic (AHRD V1 **** PURA_SOLBU); contains Interpro domain(s) IPR001114 Adenylosuccinate synthetase
1_541_134(-)	Solyc06g059910.2.1	1174	-81.1	Alpha-humulene/(-)-(E)-beta-caryophyllene synthase (AHRD V1 **** HUMS_ARATH); contains Interpro domain(s) IPR005630 Terpene synthase, metal-binding domain
1_541_134(-)	Solyc01g006640.1.1	884	-72.2	AMP-dependent synthetase and ligase (AHRD V1 *--- B2J012_NOSP7); contains Interpro domain(s) IPR011614 Catalase, N-terminal
1_541_134(-)	Solyc03g111760.2.1	574	-59.22	Argonaute 4-like protein (AHRD V1 ***- D5FQ91_PELHO); contains Interpro domain(s) IPR003165 Stem cell self-renewal protein Piwi
1_541_134(-)	Solyc04g071620.2.1	761	-61.45	ASR4 (Fragment) (AHRD V1 *-*- Q2QJU1_SOLLC); contains Interpro domain(s) IPR003496 ABA/WDS induced protein
1_541_134(-)	Solyc06g070940.2.1	758	-65.16	ATP-binding cassette transporter sub-family A member 14 (AHRD V1 ***- Q6XBG3_MOUSE); contains Interpro domain(s) IPR003439 ABC transporter-like
1_541_134(-)	Solyc01g106230.2.1	876	-67.2	B3 domain-containing protein At5g60142 (AHRD V1 *-*- Y5142_ARATH); contains Interpro domain(s) IPR003340 Transcriptional factor B3
1_541_134(-)	Solyc01g059980.2.1	749	-57.63	Beta-glucanase (AHRD V1 ***- Q53X08_NICPL); contains Interpro domain(s) IPR000490 Glycoside hydrolase, family 17
1_541_134(-)	Solyc01g060040.2.1	716	-55.97	Bromodomain and WD repeat-containing protein 1 (Predicted) (AHRD V1 *-*- B4USY4_OTOGA); contains Interpro domain(s) IPR001487 Bromodomain
1_541_134(-)	Solyc10g006450.2.1	742	-57.1	COBRA-like protein (AHRD V1 ***- Q655F2_ORYSJ); contains Interpro domain(s) IPR006918 Glycosyl-phosphatidyl inositol-anchored, plant
1_541_134(-)	Solyc05g018240.2.1	611	-54.93	CRS2-associated factor 1, chloroplastic (AHRD V1 ***- CAF1P_ORYSJ); contains Interpro domain(s) IPR001890 RNA-binding, CRM domain
1_541_134(-)	Solyc03g110880.2.1	874	-59.34	DNA-directed RNA polymerase (AHRD V1 ***- B9IL57_POPTR); contains Interpro domain(s) IPR015712 DNA-directed RNA polymerase, subunit 2
1_541_134(-)	Solyc02g089260.2.1	593	-53.12	E3 ubiquitin-protein ligase UBR4 (AHRD V1 *--- UBR4_HUMAN); contains Interpro domain(s) IPR013993 Zinc finger, N-recognin, metazoa
1_541_134(-)	Solyc09g075440.2.1	594	-50.24	Ethylene receptor (AHRD V1 **** Q41341_SOLLC); contains Interpro domain(s) IPR005467 Signal transduction histidine kinase, core
1_541_134(-)	Solyc01g086930.2.1	574	-51.05	Gamma response I protein-like (AHRD V1 *--- Q69WX8_ORYSJ); contains Interpro domain(s) IPR013882 DNA repair protein Sae2/CtIP
1_541_134(-)	Solyc10g005850.2.1	581	-55.74	Genomic DNA chromosome 3 P1 clone MJH23 (AHRD V1 *-*- Q9LHL0_ARATH); contains Interpro domain(s) IPR001202 WW/Rsp5/WWP
1_541_134(-)	Solyc08g008260.2.1	855	-60.52	Genomic DNA chromosome 5 TAC clone K16L22 (AHRD V1 *-*- Q9FJ36_ARATH)
1_541_134(-)	Solyc07g042910.2.1	573	-50.88	Genomic DNA chromosome 5 TAC clone K21L19 (AHRD V1 **-- Q9FGT4_ARATH)
1_541_134(-)	Solyc02g082280.2.1	720	-61.21	Genomic DNA chromosome 5 TAC clone K2A18 (AHRD V1 **-- Q9FKY7_ARATH); contains Interpro domain(s) IPR012880 Protein of unknown function DUF1683, C-terminal
1_541_134(-)	Solyc01g111080.2.1	1647	-120.23	Gibberellin-regulated protein 2 (AHRD V1 *--- B6UGG6_MAIZE); contains Interpro domain(s) IPR003854 Gibberellin regulated protein
1_541_134(-)	Solyc12g056960.1.1	725	-62.51	Glucan 1 3-beta-glucosidase (AHRD V1 ***- C1H4T0_PARBA); contains Interpro domain(s) IPR001547 Glycoside hydrolase, family 5
1_541_134(-)	Solyc07g061920.2.1	1191	-90.88	Glucan synthase like 3 (AHRD V1 ***- D8R8I5_SELML); contains Interpro domain(s) IPR003440 Glycosyl transferase, family 48
1_541_134(-)	Solyc02g085810.2.1	886	-70.18	HEAT repeat containing 5B (AHRD V1 *--- B9EK47_HUMAN); contains Interpro domain(s) IPR011989 Armadillo-like helical
1_541_134(-)	Solyc07g042790.1.1	1021	-75.53	Helicase-like protein (AHRD V1 ***- Q9AYF0_ORYSJ); contains Interpro domain(s) IPR010285 Protein of unknown function DUF889, eukaryote
1_541_134(-)	Solyc11g007580.1.1	878	-70.29	HhH-GPD family protein (AHRD V1 *--- D1CFH3_THET1); contains Interpro domain(s) IPR003265 HhH-GPD domain
1_541_134(-)	Solyc07g006050.1.1	584	-59.45	Histone-lysine N-methyltransferase ASHR3 (AHRD V1 *-*- ASHR3_ARATH); contains Interpro domain(s) IPR014857 Zinc finger, RING-like
1_541_134(-)	Solyc02g064610.2.1	599	-53.14	Integrator complex subunit 7 (AHRD V1 *--- INT7_CHICK)
1_541_134(-)	Solyc11g012140.1.1	584	-53.47	Isoleucyl-tRNA synthetase (AHRD V1 ***- Q6PGU7_DANRE); contains Interpro domain(s) IPR002300 Aminoacyl-tRNA synthetase, class Ia IPR002301 Isoleucyl-tRNA synthetase, class Ia IPR018353 Isoleucyl-tRNA synthetase
1_541_134(-)	Solyc03g111390.2.1	756	-54.22	Kelch domain-containing protein 4 (AHRD V1 ***- B2VXE7_PYRTR); contains Interpro domain(s) IPR015915 Kelch-type beta propeller
1_541_134(-)	Solyc09g065550.2.1	867	-62.96	Kinase interacting family protein (AHRD V1 *--- D7KCB2_ARALY); contains Interpro domain(s) IPR011684 KIP1-like
1_541_134(-)	Solyc11g044880.1.1	727	-63.23	Kinesin like protein (AHRD V1 ***- Q9SVI8_ARATH); contains Interpro domain(s) IPR001752 Kinesin, motor region
1_541_134(-)	Solyc01g108670.2.1	888	-58.63	Kinesin-like protein (AHRD V1 *-*- Q75LL2_ORYSJ); contains Interpro domain(s) IPR001752 Kinesin, motor region
1_541_134(-)	Solyc04g016080.1.1	757	-53.81	Kinesin-like protein (AHRD V1 *-*- Q9SS42_ARATH); contains Interpro domain(s) IPR001752 Kinesin, motor region
1_541_134(-)	Solyc03g112750.2.1	869	-75.88	Leucine rich repeat containing proteins-like protein (AHRD V1 *--- B3G460_ADIVA); contains Interpro domain(s) IPR003590 Leucine-rich repeat, ribonuclease inhibitor subtype
1_541_134(-)	Solyc03g025810.2.1	873	-66.74	Low-temperature-induced 65 kDa protein (AHRD V1 *--- LTI65_ARATH); contains Interpro domain(s) IPR012418 CAP160
1_541_134(-)	Solyc01g009930.1.1	756	-54.73	LRR receptor-like serine/threonine-protein kinase, RLP
1_541_134(-)	Solyc04g014400.2.1	739	-67.97	LRR receptor-like serine/threonine-protein kinase, RLP
1_541_134(-)	Solyc08g016310.2.1	732	-53.81	LRR receptor-like serine/threonine-protein kinase, RLP
1_541_134(-)	Solyc12g009770.1.1	623	-63.41	LRR receptor-like serine/threonine-protein kinase, RLP
1_541_134(-)	Solyc12g009510.1.1	619	-54.87	LRR receptor-like serine/threonine-protein kinase, RLP
1_541_134(-)	Solyc12g009730.1.1	604	-56.56	LRR receptor-like serine/threonine-protein kinase, RLP
1_541_134(-)	Solyc12g009750.1.1	604	-56.56	LRR receptor-like serine/threonine-protein kinase, RLP
1_541_134(-)	Solyc04g072260.1.1	732	-60.9	Midasin (AHRD V1 ***- B9MXW7_POPTR); contains Interpro domain(s) IPR012099 Midasin
1_541_134(-)	Solyc08g082010.2.1	915	-71.96	Myosin heavy chain-like protein (AHRD V1 *-*- Q9FJ35_ARATH); contains Interpro domain(s) IPR009053 Prefoldin
1_541_134(-)	Solyc08g006420.2.1	868	-62.62	Myosin-like protein (Fragment) (AHRD V1 *-*- Q84VD2_ORYSJ)
1_541_134(-)	Solyc04g049120.2.1	723	-61.59	Nuclear receptor corepressor 2 (AHRD V1 *-*- Q19LF0_PIG); contains Interpro domain(s) IPR014778 Myb, DNA-binding
1_541_134(-)	Solyc11g007900.1.1	734	-61.73	Os03g0107400 protein (Fragment) (AHRD V1 *--- Q0DVY2_ORYSJ); contains Interpro domain(s) IPR009053 Prefoldin
1_541_134(-)	Solyc05g054770.2.1	587	-54.68	Os03g0819700 protein (Fragment) (AHRD V1 *-*- Q0DMA9_ORYSJ)
1_541_134(-)	Solyc09g065640.2.1	582	-56.53	Os11g0585900 protein (Fragment) (AHRD V1 **-- Q0IRY6_ORYSJ); contains Interpro domain(s) IPR011990 Tetratricopeptide-like helical
1_541_134(-)	Solyc10g079790.1.1	871	-64.8	Pathogen-induced calmodulin-binding protein (Fragment) (AHRD V1 *--- Q8H6W8_PHAVU); contains Interpro domain(s) IPR012417 Calmodulin-binding, plant
1_541_134(-)	Solyc03g123570.2.1	738	-55.36	Phosphatidylinositol-4-phosphate 5-kinase family protein (AHRD V1 **-* D7L328_ARALY); contains Interpro domain(s) IPR016034 Phosphatidylinositol-4-phosphate 5-kinase, core, subgroup
1_541_134(-)	Solyc12g094420.1.1	731	-54	Predicted mechanosensitive ion channel (AHRD V1 ***- Q2TZV3_ASPOR); contains Interpro domain(s) IPR016688 Membrane protein, At2g17000, predicted
1_541_134(-)	Solyc08g074440.2.1	572	-55.08	Pre-mRNA-splicing factor CWC21 (AHRD V1 *--- B2W2U4_PYRTR); contains Interpro domain(s) IPR013170 mRNA splicing factor, Cwf21
1_541_134(-)	Solyc05g008780.2.1	587	-50.74	Proton pump interactor 1 (AHRD V1 *--- D5L6G0_SOLTU)
1_541_134(-)	Solyc06g069480.2.1	874	-64.94	Related to ATP dependent RNA helicase (AHRD V1 **-* Q6MV07_NEUCR); contains Interpro domain(s) IPR004179 Sec63 domain
1_541_134(-)	Solyc06g060350.2.1	878	-72.01	Replication factor C subunit 1 (AHRD V1 *--- C5FPB4_NANOT); contains Interpro domain(s) IPR004582 Checkpoint protein Rad24
1_541_134(-)	Solyc09g009080.2.1	1031	-93.13	Repressor of silencing 1 (AHRD V1 **-- A4PF88_TOBAC); contains Interpro domain(s) IPR003265 HhH-GPD domain
1_541_134(-)	Solyc10g083630.1.1	1040	-77.01	Repressor of silencing 2b (AHRD V1 **-- A4PF90_TOBAC); contains Interpro domain(s) IPR003265 HhH-GPD domain
1_541_134(-)	Solyc07g005470.2.1	869	-55.42	Reticulon-like protein B21 (AHRD V1 *-*- RTNLS_ARATH); contains Interpro domain(s) IPR003388 Reticulon
1_541_134(-)	Solyc05g051520.2.1	876	-67.83	Ribosomal RNA small subunit methyltransferase F (AHRD V1 *-** RSMF_SHEPW); contains Interpro domain(s) IPR001678 Bacterial Fmu (Sun)/eukaryotic nucleolar NOL1/Nop2p
1_541_134(-)	Solyc01g098240.1.1	869	-80.21	RNA polymerase Rpb1 C-terminal repeat domain-containing protein (AHRD V1 *--- C5GU31_AJEDR); contains Interpro domain(s) IPR012474 Frigida-like
1_541_134(-)	Solyc09g008530.1.1	723	-66.05	RRP1 (AHRD V1 *--- B3RH41_MEDTR); contains Interpro domain(s) IPR009053 Prefoldin
1_541_134(-)	Solyc01g111440.2.1	1168	-84.22	Senescence-associated protein 12 (AHRD V1 *-*- O81657_HEMSP); contains Interpro domain(s) IPR009686 Senescence-associated
1_541_134(-)	Solyc04g049580.2.1	924	-64.45	Similarity the ORF shows strong similarity to EST 5419 - Aspergillus oryzae (AHRD V1 ***- A2Q8A7_ASPNC)
1_541_134(-)	Solyc03g059420.2.1	595	-50.44	Sister chromatid cohesion 2 (AHRD V1 **-- D7M7D7_ARALY); contains Interpro domain(s) IPR016024 Armadillo-type fold
1_541_134(-)	Solyc04g071990.2.1	721	-64.29	Tomato GIGANTEA 1
1_541_134(-)	Solyc01g110040.2.1	871	-54.02	Transducin family protein (AHRD V1 ***- D7L1V6_ARALY)
1_541_134(-)	Solyc06g084210.2.1	570	-50.44	Transport protein SEC24 (AHRD V1 ***- C1HAV7_PARBA); contains Interpro domain(s) IPR006896 Sec23/Sec24 trunk region
1_541_134(-)	Solyc01g107260.2.1	733	-54.17	Transport protein-related (AHRD V1 *-*- Q1EPF1_MUSAC)
1_541_134(-)	Solyc04g076300.2.1	575	-50.5	Transporter small conductance mechanosensitive ion channel (MscS) family (AHRD V1 *-** A7ZLG1_ECO24); contains Interpro domain(s) IPR006685 Mechanosensitive ion channel MscS
1_541_134(-)	Solyc11g005670.1.1	708	-51.66	Ubiquitin (AHRD V1 ***- Q2UZT4_MUSAC); contains Interpro domain(s) IPR019956 Ubiquitin subgroup
1_541_134(-)	Solyc07g065630.2.1	757	-53.28	Ubiquitin-protein ligase 1 (AHRD V1 **** D7KN29_ARALY); contains Interpro domain(s) IPR000569 HECT
1_541_134(-)	Solyc05g015070.2.1	726	-58.1	U-box domain-containing protein (AHRD V1 ***- D7KBV1_ARALY); contains Interpro domain(s) IPR011989 Armadillo-like helical
1_541_134(-)	Solyc08g076720.2.1	731	-71.45	Uncharacterized ABC transporter ATP-binding protein TM_0288 (AHRD V1 *--* Y288_THEMA); contains Interpro domain(s) IPR003439 ABC transporter-like
1_541_134(-)	Solyc01g110700.2.1	12116	-865.01	Unknown Protein (AHRD V1)
1_541_134(-)	Solyc01g111180.2.1	11696	-838.39	Unknown Protein (AHRD V1)
1_541_134(-)	Solyc02g086460.2.1	1344	-117.95	Unknown Protein (AHRD V1)
1_541_134(-)	Solyc09g015010.2.1	1051	-63.9	Unknown Protein (AHRD V1)
1_541_134(-)	Solyc02g064600.2.1	621	-64.15	Unknown Protein (AHRD V1)
1_541_134(-)	Solyc06g072810.2.1	588	-52.82	Unknown Protein (AHRD V1)
1_541_134(-)	Solyc03g119650.2.1	889	-62.92	WD-40 repeat protein (AHRD V1 *--- B2J557_NOSP7); contains Interpro domain(s) IPR001194 DENN
1_541_134(-)	Solyc01g079510.2.1	1038	-96.93	WD-40 repeat protein-like (AHRD V1 *--- Q9FGX4_ARATH); contains Interpro domain(s) IPR017986 WD40 repeat, region
1_541_134(-)	Solyc01g068070.2.1	874	-51.08	Wd-repeat protein (AHRD V1 *-*- C1FDE0_9CHLO); contains Interpro domain(s) IPR017986 WD40 repeat, region
1_541_134(-)	Solyc02g024000.2.1	572	-53.38	WPP domain-associated protein (Fragment) (AHRD V1 ***- WAP_SOLLC)
1_541_134(-)	Solyc01g044350.2.1	765	-72.9	Zinc finger (Ran-binding) family protein (AHRD V1 *-*- D7KYC9_ARALY); contains Interpro domain(s) IPR001876 Zinc finger, RanBP2-type
1_541_136(+)	Solyc07g061940.2.1	610	-58.56	Acetolactate synthase (AHRD V1 **** D7RPJ7_SOLTU); contains Interpro domain(s) IPR012001 Thiamine pyrophosphate enzyme, N-terminal TPP binding region
1_541_136(+)	Solyc03g044330.1.1	578	-56.72	Acetolactate synthase (AHRD V1 **** D7RPJ7_SOLTU); contains Interpro domain(s) IPR012846 Acetolactate synthase, large subunit, biosynthetic
1_541_136(+)	Solyc06g059910.2.1	1177	-89.08	Alpha-humulene/(-)-(E)-beta-caryophyllene synthase (AHRD V1 **** HUMS_ARATH); contains Interpro domain(s) IPR005630 Terpene synthase, metal-binding domain
1_541_136(+)	Solyc06g072300.2.1	595	-55.72	ARGONAUTE 1 (AHRD V1 ***- D6RUV9_TOBAC); contains Interpro domain(s) IPR003165 Stem cell self-renewal protein Piwi
1_541_136(+)	Solyc01g059980.2.1	1019	-70.45	Beta-glucanase (AHRD V1 ***- Q53X08_NICPL); contains Interpro domain(s) IPR000490 Glycoside hydrolase, family 17
1_541_136(+)	Solyc02g089260.2.1	900	-65.35	E3 ubiquitin-protein ligase UBR4 (AHRD V1 *--- UBR4_HUMAN); contains Interpro domain(s) IPR013993 Zinc finger, N-recognin, metazoa
1_541_136(+)	Solyc07g065950.2.1	723	-62.07	Enhancer of mRNA-decapping protein 4 (AHRD V1 *--- EDC4_DANRE); contains Interpro domain(s) IPR017986 WD40 repeat, region
1_541_136(+)	Solyc12g038490.1.1	618	-55.37	Genomic DNA chromosome 5 P1 clone MXM12 (AHRD V1 *-*- Q9SD86_ARATH)
1_541_136(+)	Solyc01g111080.2.1	746	-56.42	Gibberellin-regulated protein 2 (AHRD V1 *--- B6UGG6_MAIZE); contains Interpro domain(s) IPR003854 Gibberellin regulated protein
1_541_136(+)	Solyc05g015930.2.1	592	-53.44	GYF domain-containing protein (AHRD V1 *-*- D7KBQ1_ARALY); contains Interpro domain(s) IPR003169 GYF
1_541_136(+)	Solyc05g015920.2.1	591	-50.11	GYF domain-containing protein (AHRD V1 ***- D7KBQ1_ARALY); contains Interpro domain(s) IPR003169 GYF
1_541_136(+)	Solyc11g006650.1.1	586	-52.47	Heat shock protein 101 (AHRD V1 *-*- Q3L1D0_VITVI); contains Interpro domain(s) IPR004176 Clp, N-terminal
1_541_136(+)	Solyc11g020620.1.1	887	-54.15	Myocyte enhancer factor 2 (AHRD V1 ***- A3FMC1_BRABE); contains Interpro domain(s) IPR002100 Transcription factor, MADS-box
1_541_136(+)	Solyc07g017510.2.1	761	-54.64	Phosphatidylinositol-4-phosphate 5-kinase family protein (AHRD V1 **-* D7L328_ARALY); contains Interpro domain(s) IPR016034 Phosphatidylinositol-4-phosphate 5-kinase, core, subgroup
1_541_136(+)	Solyc09g092100.2.1	899	-77.57	Predicted CDS Pa_5_8110 (Fragment) (AHRD V1 *--- B2AKK2_PODAN); contains Interpro domain(s) IPR003594 ATP-binding region, ATPase-like
1_541_136(+)	Solyc01g111440.2.1	737	-57.85	Senescence-associated protein 12 (AHRD V1 *-*- O81657_HEMSP); contains Interpro domain(s) IPR009686 Senescence-associated
1_541_136(+)	Solyc03g005550.2.1	1004	-77.32	Serine/threonine-protein phosphatase 7 long form homolog (AHRD V1 **-- PPP7L_ARATH); contains Interpro domain(s) IPR019557 Aminotransferase-like, plant mobile domain
1_541_136(+)	Solyc09g092240.2.1	614	-53.54	Small subunit processome component 20 homolog (AHRD V1 **-- UTP20_MOUSE); contains Interpro domain(s) IPR011430 Down-regulated in metastasis
1_541_136(+)	Solyc04g010310.2.1	579	-56.71	Uncharacterized ABC transporter ATP-binding protein/permease C9B6.09c (AHRD V1 *-** YNT9_SCHPO); contains Interpro domain(s) IPR003439 ABC transporter-like
1_541_136(+)	Solyc01g111180.2.1	8020	-541.16	Unknown Protein (AHRD V1)
1_541_136(+)	Solyc01g110700.2.1	7768	-528.72	Unknown Protein (AHRD V1)
1_541_136(+)	Solyc06g010150.1.1	1032	-81.42	Unknown Protein (AHRD V1)
1_541_136(+)	Solyc06g019130.1.1	1032	-75.78	Unknown Protein (AHRD V1)
1_541_136(+)	Solyc01g017990.1.1	892	-67.97	Unknown Protein (AHRD V1)
1_541_136(+)	Solyc02g064600.2.1	873	-61.42	Unknown Protein (AHRD V1)
1_541_136(+)	Solyc06g019140.1.1	605	-56.2	Unknown Protein (AHRD V1)
1_541_136(+)	Solyc10g062280.1.1	602	-55.98	Unknown Protein (AHRD V1)
1_541_136(+)	Solyc01g017930.1.1	577	-52.99	Unknown Protein (AHRD V1)
1_541_136(+)	Solyc05g044610.1.1	596	-54.45	Vacuolar protein sorting-associated protein 8 (AHRD V1 *--- D0NE39_PHYIN); contains Interpro domain(s) IPR016024 Armadillo-type fold
1_541_136(+)	Solyc11g045160.1.1	730	-56.1	Vacuolar sorting-associated protein (AHRD V1 *-*- C0NJR3_AJECG)
1_541_155(-)	Solyc02g086530.2.1	577	-50.56	Alpha-galactosidase (AHRD V1 **-- C0NUM4_AJECG); contains Interpro domain(s) IPR008811 Raffinose synthase
1_541_155(-)	Solyc06g059910.2.1	747	-54.2	Alpha-humulene/(-)-(E)-beta-caryophyllene synthase (AHRD V1 **** HUMS_ARATH); contains Interpro domain(s) IPR005630 Terpene synthase, metal-binding domain
1_541_155(-)	Solyc01g091460.2.1	731	-71.61	ARF guanine-nucleotide exchange factor 2 (AHRD V1 *--* GEA2_YEAST); contains Interpro domain(s) IPR000904 SEC7-like
1_541_155(-)	Solyc08g081400.2.1	596	-50.87	BEL1-like homeodomain protein 2 (AHRD V1 *--- BLH2_ARATH); contains Interpro domain(s) IPR006563 POX
1_541_155(-)	Solyc01g059980.2.1	2811	-233.34	Beta-glucanase (AHRD V1 ***- Q53X08_NICPL); contains Interpro domain(s) IPR000490 Glycoside hydrolase, family 17
1_541_155(-)	Solyc05g005550.2.1	749	-67.63	BURP domain-containing protein (Fragment) (AHRD V1 *--- C1PI44_ARATH); contains Interpro domain(s) IPR004873 BURP
1_541_155(-)	Solyc07g053870.2.1	585	-51.05	Chromodomain-helicase-DNA-binding protein 2 (AHRD V1 *--* CHD2_HUMAN); contains Interpro domain(s) IPR000330 SNF2-related
1_541_155(-)	Solyc04g015720.1.1	3742	-285.9	Coiled-coil-containing protein (Fragment) (AHRD V1 *--- A7TZ74_9MAXI)
1_541_155(-)	Solyc06g064700.1.1	2538	-202.59	Coiled-coil-containing protein (Fragment) (AHRD V1 *-*- A7TZ74_9MAXI)
1_541_155(-)	Solyc02g080060.1.1	598	-50.61	Cysteine-rich receptor-like protein kinase 29 (AHRD V1 **** CRK29_ARATH); contains Interpro domain(s) IPR002902 Protein of unknown function DUF26
1_541_155(-)	Solyc04g011690.2.1	580	-51.17	Cytochrome P450
1_541_155(-)	Solyc08g068670.2.1	596	-52.15	Decarboxylase family protein (AHRD V1 ***- B1ILJ6_CLOBK); contains Interpro domain(s) IPR002129 Pyridoxal phosphate-dependent decarboxylase
1_541_155(-)	Solyc07g009350.2.1	585	-56.06	Digestive organ expansion factor (AHRD V1 **-- C0HA99_SALSA); contains Interpro domain(s) IPR010678 Protein of unknown function DUF1253
1_541_155(-)	Solyc03g110880.2.1	732	-60.14	DNA-directed RNA polymerase (AHRD V1 ***- B9IL57_POPTR); contains Interpro domain(s) IPR015712 DNA-directed RNA polymerase, subunit 2
1_541_155(-)	Solyc10g080350.1.1	894	-78.45	DNA-directed RNA polymerase (AHRD V1 ***- B9SL65_RICCO); contains Interpro domain(s) IPR015699 DNA-directed RNA pol I, largest subunit
1_541_155(-)	Solyc02g089260.2.1	1179	-94.88	E3 ubiquitin-protein ligase UBR4 (AHRD V1 *--- UBR4_HUMAN); contains Interpro domain(s) IPR013993 Zinc finger, N-recognin, metazoa
1_541_155(-)	Solyc01g097680.2.1	731	-60.76	Extensin-like protein Dif10 (Fragment) (AHRD V1 *-*- Q43504_SOLLC)
1_541_155(-)	Solyc01g005880.1.1	624	-53.31	Extensin-like protein Dif10 (Fragment) (AHRD V1 *-*- Q43504_SOLLC)
1_541_155(-)	Solyc01g097700.1.1	607	-53.81	Extensin-like protein Dif10 (Fragment) (AHRD V1 *-*- Q43504_SOLLC)
1_541_155(-)	Solyc03g082770.1.1	746	-60.68	Extensin-like protein Dif10 (Fragment) (AHRD V1 *-*- Q43504_SOLLC); contains Interpro domain(s) IPR006706 Extensin-like region
1_541_155(-)	Solyc01g097690.2.1	585	-50.28	Extensin-like protein Dif54 (AHRD V1 *-*- Q43505_SOLLC); contains Interpro domain(s) IPR006706 Extensin-like region
1_541_155(-)	Solyc01g097110.1.1	582	-50.07	Fanconi anemia group D2 protein (AHRD V1 *-*- FACD2_HUMAN)
1_541_155(-)	Solyc10g009240.2.1	603	-55.63	Fatty acid elongase 3-ketoacyl-CoA synthase (AHRD V1 **** Q6DUV6_BRANA); contains Interpro domain(s) IPR012392 Very-long-chain 3-ketoacyl-CoA synthase
1_541_155(-)	Solyc05g008470.1.1	607	-51.8	F-box family protein (AHRD V1 *-*- D7KQH0_ARALY); contains Interpro domain(s) IPR006566 FBD-like
1_541_155(-)	Solyc06g071670.1.1	765	-70.95	Genomic DNA chromosome 5 TAC clone K15C23 (AHRD V1 ***- Q9LU06_ARATH)
1_541_155(-)	Solyc08g008260.2.1	582	-61.51	Genomic DNA chromosome 5 TAC clone K16L22 (AHRD V1 *-*- Q9FJ36_ARATH)
1_541_155(-)	Solyc01g111080.2.1	1725	-130.69	Gibberellin-regulated protein 2 (AHRD V1 *--- B6UGG6_MAIZE); contains Interpro domain(s) IPR003854 Gibberellin regulated protein
1_541_155(-)	Solyc08g068960.2.1	597	-55.16	Histidine kinase 1 (AHRD V1 *-** Q9FRY7_MAIZE); contains Interpro domain(s) IPR004358 Signal transduction histidine kinase-related protein, C-terminal
1_541_155(-)	Solyc04g057880.2.1	579	-50.35	Histone-lysine N-methyltransferase (AHRD V1 *-*- B6K1E8_SCHJY); contains Interpro domain(s) IPR001214 SET
1_541_155(-)	Solyc09g098240.2.1	581	-51.55	Importin-7 (Imp7) (Ran-binding protein 7) (RanBP7) (AHRD V1 **** D8LDH6_ECTSI); contains Interpro domain(s) IPR011989 Armadillo-like helical
1_541_155(-)	Solyc01g108670.2.1	890	-86.02	Kinesin-like protein (AHRD V1 *-*- Q75LL2_ORYSJ); contains Interpro domain(s) IPR001752 Kinesin, motor region
1_541_155(-)	Solyc09g010810.2.1	1052	-66.4	Kinesin-like protein (AHRD V1 ***- Q8L7B8_ARATH); contains Interpro domain(s) IPR001752 Kinesin, motor region
1_541_155(-)	Solyc04g009990.2.1	729	-54.86	Lysine-specific demethylase 5A (AHRD V1 *--- KDM5A_MOUSE); contains Interpro domain(s) IPR013129 Transcription factor jumonji
1_541_155(-)	Solyc04g015750.2.1	573	-52.14	Magnesium chelatase H subunit (AHRD V1 ***- D5KXY0_VITVI); contains Interpro domain(s) IPR011771 Magnesium-chelatase, subunit H
1_541_155(-)	Solyc05g056210.2.1	588	-57.91	Methyltransferase like 3 (AHRD V1 *-** Q28H22_XENTR); contains Interpro domain(s) IPR007757 MT-A70
1_541_155(-)	Solyc05g056620.1.1	599	-50.12	Myocyte-specific enhancer factor 2D (AHRD V1 *-*- MEF2D_HUMAN); contains Interpro domain(s) IPR002100 Transcription factor, MADS-box IPR002487 Transcription factor, K-box
1_541_155(-)	Solyc08g006420.2.1	579	-50.77	Myosin-like protein (Fragment) (AHRD V1 *-*- Q84VD2_ORYSJ)
1_541_155(-)	Solyc03g082680.2.1	571	-53.98	Neuroblastoma-amplified protein-like protein (AHRD V1 *-*- D2V0U7_NAEGR); contains Interpro domain(s) IPR011046 WD40 repeat-like
1_541_155(-)	Solyc12g017280.1.1	596	-54.62	Os10g0575800 protein (Fragment) (AHRD V1 ***- Q0IVE5_ORYSJ); contains Interpro domain(s) IPR016024 Armadillo-type fold
1_541_155(-)	Solyc02g087360.2.1	569	-53.09	Paired amphipathic helix protein SIN3 (AHRD V1 *--- B3LJ52_YEAS1); contains Interpro domain(s) IPR013194 Histone deacetylase interacting
1_541_155(-)	Solyc06g051960.2.1	895	-70.26	Pectinesterase (AHRD V1 ***- B9IDR8_POPTR); contains Interpro domain(s) IPR000070 Pectinesterase, catalytic
1_541_155(-)	Solyc01g065910.1.1	3845	-281.83	Periaxin-like protein (AHRD V1 *--- Q940G9_ARATH)
1_541_155(-)	Solyc01g105730.1.1	3387	-269.05	Periaxin-like protein (AHRD V1 *--- Q9LXB8_ARATH)
1_541_155(-)	Solyc09g007910.2.1	886	-61.22	Phenylalanine ammonia-lyase (AHRD V1 **** B5LAW0_CAPAN); contains Interpro domain(s) IPR005922 Phenylalanine ammonia-lyase
1_541_155(-)	Solyc04g006970.2.1	579	-50.59	Phosphoenolpyruvate carboxylase (AHRD V1 **** A6YM33_RICCO); contains Interpro domain(s) IPR015813 Pyruvate/Phosphoenolpyruvate kinase, catalytic core
1_541_155(-)	Solyc02g069450.2.1	905	-69.62	Photosystem I reaction center subunit III (AHRD V1 ***- Q9XQB4_PHAAU); contains Interpro domain(s) IPR003666 Photosystem I reaction centre protein PsaF, subunit III
1_541_155(-)	Solyc09g007820.1.1	591	-51.19	Phototropic-responsive NPH3 family protein (AHRD V1 **-- D7KEU3_ARALY); contains Interpro domain(s) IPR004249 NPH3
1_541_155(-)	Solyc05g008430.2.1	599	-60.6	pH-response regulator protein palA/RIM20 (AHRD V1 **-- C5FER8_NANOT); contains Interpro domain(s) IPR004328 BRO1
1_541_155(-)	Solyc01g109080.2.1	716	-67.89	Protein kinase (AHRD V1 *-*- D3AX52_POLPA); contains Interpro domain(s) IPR000403 Phosphatidylinositol 3- and 4-kinase, catalytic
1_541_155(-)	Solyc01g095900.2.1	732	-68.55	Protein TIF31 homolog (AHRD V1 *--- TIF31_ASPCL); contains Interpro domain(s) IPR011990 Tetratricopeptide-like helical
1_541_155(-)	Solyc07g006030.2.1	731	-62.5	Protein TIF31 homolog (AHRD V1 *--- TIF31_COCIM); contains Interpro domain(s) IPR011990 Tetratricopeptide-like helical
1_541_155(-)	Solyc01g111440.2.1	1172	-96.07	Senescence-associated protein 12 (AHRD V1 *-*- O81657_HEMSP); contains Interpro domain(s) IPR009686 Senescence-associated
1_541_155(-)	Solyc01g104490.2.1	732	-51.23	Separin (AHRD V1 *--- C5JQX2_AJEDS); contains Interpro domain(s) IPR005314 Peptidase C50, separase
1_541_155(-)	Solyc06g064730.1.1	3865	-303.08	Serine rich protein (Fragment) (AHRD V1 *--- Q94563_ENTHI)
1_541_155(-)	Solyc01g059990.2.1	1183	-103.51	Serine/threonine-protein phosphatase 7 long form homolog (AHRD V1 *--- PPP7L_ARATH); contains Interpro domain(s) IPR019557 Aminotransferase-like, plant mobile domain
1_541_155(-)	Solyc03g005550.2.1	764	-65.15	Serine/threonine-protein phosphatase 7 long form homolog (AHRD V1 **-- PPP7L_ARATH); contains Interpro domain(s) IPR019557 Aminotransferase-like, plant mobile domain
1_541_155(-)	Solyc04g049580.2.1	574	-55.93	Similarity the ORF shows strong similarity to EST 5419 - Aspergillus oryzae (AHRD V1 ***- A2Q8A7_ASPNC)
1_541_155(-)	Solyc01g106940.2.1	1484	-112.39	Single myb histone 4 (Fragment) (AHRD V1 *--- A6MZD9_ORYSI); contains Interpro domain(s) IPR005818 Histone H1/H5
1_541_155(-)	Solyc03g116920.1.1	867	-77.08	Sister chromatid cohesion protein PDS5 homolog A (AHRD V1 *--- PDS5A_CHICK)
1_541_155(-)	Solyc02g087980.2.1	592	-55.35	Structural maintenance of chromosomes protein 4 (AHRD V1 **-- D8TXU8_VOLCA); contains Interpro domain(s) IPR003395 RecF/RecN/SMC protein, N-terminal
1_541_155(-)	Solyc01g110040.2.1	733	-51.02	Transducin family protein (AHRD V1 ***- D7L1V6_ARALY)
1_541_155(-)	Solyc08g076910.2.1	903	-55.33	Ubiquitin carboxyl-terminal hydrolase (AHRD V1 ***- B9N2M4_POPTR); contains Interpro domain(s) IPR001394 Peptidase C19, ubiquitin carboxyl-terminal hydrolase 2
1_541_155(-)	Solyc04g076620.2.1	1010	-94.61	Ubiquitin-protein ligase 1 (AHRD V1 *-** D7KN29_ARALY); contains Interpro domain(s) IPR000569 HECT
1_541_155(-)	Solyc10g047840.1.1	606	-50.32	Ulp1 protease family C-terminal catalytic domain containing protein (AHRD V1 *-*- Q60D46_SOLDE); contains Interpro domain(s) IPR003653 Peptidase C48, SUMO/Sentrin/Ubl1
1_541_155(-)	Solyc01g110700.2.1	18162	-1421.68	Unknown Protein (AHRD V1)
1_541_155(-)	Solyc01g111180.2.1	16351	-1335.87	Unknown Protein (AHRD V1)
1_541_155(-)	Solyc06g075840.1.1	2135	-191.29	Unknown Protein (AHRD V1)
1_541_155(-)	Solyc01g105740.1.1	1625	-104.72	Unknown Protein (AHRD V1)
1_541_155(-)	Solyc09g064560.1.1	861	-69.65	Unknown Protein (AHRD V1)
1_541_155(-)	Solyc01g060150.2.1	749	-57.99	Unknown Protein (AHRD V1)
1_541_155(-)	Solyc04g039640.2.1	727	-56.99	Unknown Protein (AHRD V1)
1_541_155(-)	Solyc07g052710.1.1	516	-68.67	Unknown Protein (AHRD V1)
1_541_155(-)	Solyc05g007110.2.1	722	-51.94	WRKY transcription factor 72 (AHRD V1 ***- C5H9Z9_BRANA); contains Interpro domain(s) IPR003657 DNA-binding WRKY
1_541_155(-)	Solyc09g031650.2.1	597	-58.61	Zinc finger protein (AHRD V1 *--- Q1RQ04_CIOIN); contains Interpro domain(s) IPR001841 Zinc finger, RING-type
1_541_178(+)	Solyc08g007950.2.1	740	-57.43	30S ribosomal protein S1 (AHRD V1 *-*- B9CNP3_9ACTN); contains Interpro domain(s) IPR003029 Ribosomal protein S1, RNA binding domain
1_541_178(+)	Solyc07g052320.2.1	735	-53.5	Beta-1 3-galactosyltransferase 6 (AHRD V1 ***- B6UBH3_MAIZE); contains Interpro domain(s) IPR002659 Glycosyl transferase, family 31
1_541_178(+)	Solyc01g006120.2.1	726	-56.71	Casein kinase-like protein (AHRD V1 ***- Q9LID3_ARATH); contains Interpro domain(s) IPR002290 Serine/threonine protein kinase
1_541_178(+)	Solyc01g098340.2.1	718	-52.74	DNAJ heat shock N-terminal domain-containing protein (Fragment) (AHRD V1 *-*- D7L312_ARALY); contains Interpro domain(s) IPR015609 Molecular chaperone, heat shock protein, Hsp40, DnaJ
1_541_178(+)	Solyc01g111080.2.1	1339	-104.89	Gibberellin-regulated protein 2 (AHRD V1 *--- B6UGG6_MAIZE); contains Interpro domain(s) IPR003854 Gibberellin regulated protein
1_541_178(+)	Solyc02g080210.2.1	589	-52.19	Pectinesterase (AHRD V1 ***- B9RXQ4_RICCO); contains Interpro domain(s) IPR000070 Pectinesterase, catalytic
1_541_178(+)	Solyc09g007910.2.1	726	-52.43	Phenylalanine ammonia-lyase (AHRD V1 **** B5LAW0_CAPAN); contains Interpro domain(s) IPR005922 Phenylalanine ammonia-lyase
1_541_178(+)	Solyc07g005600.2.1	609	-55.72	Transmembrane 9 superfamily protein member 4 (AHRD V1 **** B6SXZ2_MAIZE); contains Interpro domain(s) IPR004240 Nonaspanin (TM9SF)
1_541_178(+)	Solyc08g060810.2.1	611	-59.49	Ubiquitin ligase complex F-box protein GRR1 (AHRD V1 *-** C5G8H6_AJEDR); contains Interpro domain(s) IPR006553 Leucine-rich repeat, cysteine-containing subtype
1_541_178(+)	Solyc01g110700.2.1	7967	-556.12	Unknown Protein (AHRD V1)
1_541_178(+)	Solyc01g111180.2.1	7375	-531.08	Unknown Protein (AHRD V1)
1_541_178(+)	Solyc05g018580.1.1	888	-62.22	Unknown Protein (AHRD V1)
1_541_178(+)	Solyc02g064600.2.1	712	-65.78	Unknown Protein (AHRD V1)
1_541_178(+)	Solyc06g009990.1.1	871	-52.62	Unknown Protein (AHRD V1); contains Interpro domain(s) IPR000366 Fungal pheromone mating factor STE2 GPCR
1_541_178(+)	Solyc12g062960.1.1	1772	-111.64	Unknown Protein (AHRD V1); contains Interpro domain(s) IPR000434 Polycystic kidney disease type 1 protein
1_541_178(+)	Solyc12g062990.1.1	2064	-128.46	Unknown Protein (AHRD V1); contains Interpro domain(s) IPR000515 Binding-protein-dependent transport systems inner membrane component
1_541_178(+)	Solyc09g015570.1.1	2009	-106.32	Unknown Protein (AHRD V1); contains Interpro domain(s) IPR000515 Binding-protein-dependent transport systems inner membrane component
1_541_178(+)	Solyc12g063000.1.1	4064	-237.7	Unknown Protein (AHRD V1); contains Interpro domain(s) IPR001463 Sodium:alanine symporter
1_541_178(+)	Solyc01g034180.1.1	2179	-145.1	Unknown Protein (AHRD V1); contains Interpro domain(s) IPR001463 Sodium:alanine symporter
1_541_178(+)	Solyc01g034220.1.1	1025	-64.66	Unknown Protein (AHRD V1); contains Interpro domain(s) IPR001463 Sodium:alanine symporter
1_541_178(+)	Solyc12g062950.1.1	1020	-58.61	Unknown Protein (AHRD V1); contains Interpro domain(s) IPR001463 Sodium:alanine symporter
1_541_178(+)	Solyc10g050020.1.1	884	-50.73	Unknown Protein (AHRD V1); contains Interpro domain(s) IPR001734 Sodium/solute symporter
1_541_178(+)	Solyc07g038150.1.1	1771	-117.13	Unknown Protein (AHRD V1); contains Interpro domain(s) IPR001991 Sodium:dicarboxylate symporter
1_541_178(+)	Solyc12g062970.1.1	1308	-72.73	Unknown Protein (AHRD V1); contains Interpro domain(s) IPR002956 Bride of sevenless protein
1_541_178(+)	Solyc12g062980.1.1	3236	-202.01	Unknown Protein (AHRD V1); contains Interpro domain(s) IPR017452 GPCR, rhodopsin-like superfamily
1_541_178(+)	Solyc10g050010.1.1	2315	-142.28	Unknown Protein (AHRD V1); contains Interpro domain(s) IPR017452 GPCR, rhodopsin-like superfamily
1_541_178(+)	Solyc08g077500.2.1	630	-55.97	Vacuolar protein sorting-associated protein (AHRD V1 *-*- D3BBX0_POLPA); contains Interpro domain(s) IPR001849 Pleckstrin homology
1_541_197(-)	Solyc04g076540.2.1	576	-66.26	Aberrant pollen transmission 1 (AHRD V1 **-- Q4JQG0_MAIZE); contains Interpro domain(s) IPR019443 Protein of unknown function FMP27, domain-6, C-terminal
1_541_197(-)	Solyc07g005390.2.1	722	-51.61	Aldehyde dehydrogenase (AHRD V1 **** A7GLM2_BACCN); contains Interpro domain(s) IPR015590 Aldehyde dehydrogenase
1_541_197(-)	Solyc07g006430.1.1	585	-55.5	Aspartic proteinase nepenthesin I (AHRD V1 **-- A9ZMF9_NEPAL); contains Interpro domain(s) IPR001461 Peptidase A1
1_541_197(-)	Solyc06g008810.2.1	789	-71.23	Auxin F-box protein 5 (AHRD V1 **-- D7MPH1_ARALY); contains Interpro domain(s) IPR006553 Leucine-rich repeat, cysteine-containing subtype
1_541_197(-)	Solyc01g106230.2.1	586	-57.72	B3 domain-containing protein At5g60142 (AHRD V1 *-*- Y5142_ARATH); contains Interpro domain(s) IPR003340 Transcriptional factor B3
1_541_197(-)	Solyc01g059980.2.1	886	-61.27	Beta-glucanase (AHRD V1 ***- Q53X08_NICPL); contains Interpro domain(s) IPR000490 Glycoside hydrolase, family 17
1_541_197(-)	Solyc01g006120.2.1	761	-67.01	Casein kinase-like protein (AHRD V1 ***- Q9LID3_ARATH); contains Interpro domain(s) IPR002290 Serine/threonine protein kinase
1_541_197(-)	Solyc01g090800.2.1	611	-55.9	Cyclin-dependent kinase (AHRD V1 **** A6YTD1_CUCME); contains Interpro domain(s) IPR012389 Negative regulatory factor PREG
1_541_197(-)	Solyc03g110880.2.1	727	-57.17	DNA-directed RNA polymerase (AHRD V1 ***- B9IL57_POPTR); contains Interpro domain(s) IPR015712 DNA-directed RNA polymerase, subunit 2
1_541_197(-)	Solyc02g089260.2.1	734	-53.22	E3 ubiquitin-protein ligase UBR4 (AHRD V1 *--- UBR4_HUMAN); contains Interpro domain(s) IPR013993 Zinc finger, N-recognin, metazoa
1_541_197(-)	Solyc01g066450.2.1	594	-56.81	Epoxide hydrolase (AHRD V1 ***- Q41415_SOLTU); contains Interpro domain(s) IPR000639 Epoxide hydrolase-like
1_541_197(-)	Solyc03g083440.2.1	585	-58.95	Glutamate synthase (AHRD V1 **** C1E4G5_9CHLO); contains Interpro domain(s) IPR012220 Glutamate synthase, eukaryotic IPR006005 Glutamate synthase, NADH/NADPH, small subunit 1
1_541_197(-)	Solyc02g093870.2.1	750	-66.16	Histidine amino acid transporter (AHRD V1 *-** Q85V22_ORYSI); contains Interpro domain(s) IPR013057 Amino acid transporter, transmembrane
1_541_197(-)	Solyc09g090080.1.1	714	-67.73	Inorganic phosphate transporter (AHRD V1 **** Q9LLS5_TOBAC); contains Interpro domain(s) IPR004738 Phosphate permease
1_541_197(-)	Solyc08g016310.2.1	1016	-71.96	LRR receptor-like serine/threonine-protein kinase, RLP
1_541_197(-)	Solyc04g014400.2.1	715	-53.21	LRR receptor-like serine/threonine-protein kinase, RLP
1_541_197(-)	Solyc04g072260.1.1	729	-60.14	Midasin (AHRD V1 ***- B9MXW7_POPTR); contains Interpro domain(s) IPR012099 Midasin
1_541_197(-)	Solyc09g065830.2.1	591	-61.2	NADH ubiquinone oxidoreductase subunit (AHRD V1 **** Q6V9B3_CHLRE); contains Interpro domain(s) IPR002023 NADH:ubiquinone oxidoreductase, 24 kDa subunit
1_541_197(-)	Solyc02g091100.2.1	588	-51.73	Oxalyl-CoA decarboxylase (AHRD V1 **-- D5PWM9_COREQ); contains Interpro domain(s) IPR012001 Thiamine pyrophosphate enzyme, N-terminal TPP binding region
1_541_197(-)	Solyc02g080210.2.1	760	-64.8	Pectinesterase (AHRD V1 ***- B9RXQ4_RICCO); contains Interpro domain(s) IPR000070 Pectinesterase, catalytic
1_541_197(-)	Solyc01g102360.1.1	566	-50.84	Peptide transporter-like protein (AHRD V1 **-* Q9LSE8_ARATH); contains Interpro domain(s) IPR000109 TGF-beta receptor, type I/II extracellular region
1_541_197(-)	Solyc03g112070.2.1	576	-50.1	Phosphoglycerate dehydrogenase (AHRD V1 **** D2D316_GOSHI); contains Interpro domain(s) IPR015508 D-3-phosphogylcerate Dehydrogenase
1_541_197(-)	Solyc08g044400.1.1	619	-65.89	Polyphosphoinositide phosphatase (AHRD V1 *--* B6K225_SCHJY); contains Interpro domain(s) IPR001202 WW/Rsp5/WWP
1_541_197(-)	Solyc07g065630.2.1	719	-64.8	Ubiquitin-protein ligase 1 (AHRD V1 **** D7KN29_ARALY); contains Interpro domain(s) IPR000569 HECT
1_541_197(-)	Solyc01g110700.2.1	7376	-496.32	Unknown Protein (AHRD V1)
1_541_197(-)	Solyc01g111180.2.1	7232	-493.25	Unknown Protein (AHRD V1)
1_541_197(-)	Solyc05g018580.1.1	5619	-408.15	Unknown Protein (AHRD V1)
1_541_197(-)	Solyc09g015560.1.1	4943	-402.3	Unknown Protein (AHRD V1)
1_541_197(-)	Solyc11g030620.1.1	4173	-318.39	Unknown Protein (AHRD V1)
1_541_197(-)	Solyc08g029040.1.1	4125	-266.11	Unknown Protein (AHRD V1)
1_541_197(-)	Solyc07g026610.1.1	3932	-261.03	Unknown Protein (AHRD V1)
1_541_197(-)	Solyc12g062320.1.1	3245	-215.96	Unknown Protein (AHRD V1)
1_541_197(-)	Solyc01g058090.1.1	3076	-205.75	Unknown Protein (AHRD V1)
1_541_197(-)	Solyc04g025920.2.1	2782	-189.07	Unknown Protein (AHRD V1)
1_541_197(-)	Solyc04g028430.1.1	2554	-209.91	Unknown Protein (AHRD V1)
1_541_197(-)	Solyc12g038560.1.1	2371	-176.06	Unknown Protein (AHRD V1)
1_541_197(-)	Solyc08g061150.1.1	2226	-155.32	Unknown Protein (AHRD V1)
1_541_197(-)	Solyc07g021320.2.1	2093	-176.11	Unknown Protein (AHRD V1)
1_541_197(-)	Solyc04g028420.1.1	1784	-130.87	Unknown Protein (AHRD V1)
1_541_197(-)	Solyc06g008570.1.1	1689	-70.43	Unknown Protein (AHRD V1)
1_541_197(-)	Solyc07g017360.1.1	1207	-105.35	Unknown Protein (AHRD V1)
1_541_197(-)	Solyc05g026020.1.1	892	-66.96	Unknown Protein (AHRD V1)
1_541_197(-)	Solyc01g066790.1.1	736	-50.85	Unknown Protein (AHRD V1)
1_541_197(-)	Solyc01g105720.2.1	592	-50.15	Unknown Protein (AHRD V1)
1_541_197(-)	Solyc10g044660.1.1	8869	-617.29	Unknown Protein (AHRD V1); contains Interpro domain(s) IPR000245 ATPase, V0 complex, proteolipid subunit C
1_541_197(-)	Solyc06g009990.1.1	7094	-521.94	Unknown Protein (AHRD V1); contains Interpro domain(s) IPR000366 Fungal pheromone mating factor STE2 GPCR
1_541_197(-)	Solyc12g062960.1.1	12240	-855.26	Unknown Protein (AHRD V1); contains Interpro domain(s) IPR000434 Polycystic kidney disease type 1 protein
1_541_197(-)	Solyc12g062990.1.1	17207	-1119.45	Unknown Protein (AHRD V1); contains Interpro domain(s) IPR000515 Binding-protein-dependent transport systems inner membrane component
1_541_197(-)	Solyc09g015570.1.1	8689	-691.2	Unknown Protein (AHRD V1); contains Interpro domain(s) IPR000515 Binding-protein-dependent transport systems inner membrane component
1_541_197(-)	Solyc12g063000.1.1	34263	-2368.45	Unknown Protein (AHRD V1); contains Interpro domain(s) IPR001463 Sodium:alanine symporter
1_541_197(-)	Solyc01g034180.1.1	14697	-1146.87	Unknown Protein (AHRD V1); contains Interpro domain(s) IPR001463 Sodium:alanine symporter
1_541_197(-)	Solyc01g034220.1.1	12881	-987.18	Unknown Protein (AHRD V1); contains Interpro domain(s) IPR001463 Sodium:alanine symporter
1_541_197(-)	Solyc12g062950.1.1	9408	-631.48	Unknown Protein (AHRD V1); contains Interpro domain(s) IPR001463 Sodium:alanine symporter
1_541_197(-)	Solyc10g050020.1.1	9996	-700.72	Unknown Protein (AHRD V1); contains Interpro domain(s) IPR001734 Sodium/solute symporter
1_541_197(-)	Solyc07g032190.1.1	2068	-146.69	Unknown Protein (AHRD V1); contains Interpro domain(s) IPR001734 Sodium/solute symporter
1_541_197(-)	Solyc07g038150.1.1	11905	-761.09	Unknown Protein (AHRD V1); contains Interpro domain(s) IPR001991 Sodium:dicarboxylate symporter
1_541_197(-)	Solyc08g059780.1.1	6429	-417.98	Unknown Protein (AHRD V1); contains Interpro domain(s) IPR001991 Sodium:dicarboxylate symporter
1_541_197(-)	Solyc10g062190.1.1	6030	-402.14	Unknown Protein (AHRD V1); contains Interpro domain(s) IPR001991 Sodium:dicarboxylate symporter
1_541_197(-)	Solyc12g062970.1.1	14390	-934.1	Unknown Protein (AHRD V1); contains Interpro domain(s) IPR002956 Bride of sevenless protein
1_541_197(-)	Solyc12g062980.1.1	25930	-1760.95	Unknown Protein (AHRD V1); contains Interpro domain(s) IPR017452 GPCR, rhodopsin-like superfamily
1_541_197(-)	Solyc10g050010.1.1	22428	-1518.06	Unknown Protein (AHRD V1); contains Interpro domain(s) IPR017452 GPCR, rhodopsin-like superfamily
1_541_197(-)	Solyc09g007540.2.1	592	-64.62	Valyl-tRNA synthetase (AHRD V1 **** Q7G2B1_ORYSJ); contains Interpro domain(s) IPR002303 Valyl-tRNA synthetase, class Ia
1_541_197(-)	Solyc06g072720.2.1	729	-58.68	Zinc finger CCCH domain-containing protein 56 (AHRD V1 ***- C3H56_ORYSJ); contains Interpro domain(s) IPR000571 Zinc finger, CCCH-type
1_541_197(-)	Solyc06g016770.2.1	608	-54.57	Zinc finger family protein (AHRD V1 **-- D7MTV5_ARALY); contains Interpro domain(s) IPR011016 Zinc finger, RING-CH-type
1_541_239(-)	Solyc06g059910.2.1	851	-70.77	Alpha-humulene/(-)-(E)-beta-caryophyllene synthase (AHRD V1 **** HUMS_ARATH); contains Interpro domain(s) IPR005630 Terpene synthase, metal-binding domain
1_541_239(-)	Solyc01g059980.2.1	1169	-96.42	Beta-glucanase (AHRD V1 ***- Q53X08_NICPL); contains Interpro domain(s) IPR000490 Glycoside hydrolase, family 17
1_541_239(-)	Solyc12g035500.1.1	566	-54.85	Endoplasmic reticulum metallopeptidase 1 (AHRD V1 **-- ERMP1_XENLA); contains Interpro domain(s) IPR007484 Peptidase M28
1_541_239(-)	Solyc02g093770.2.1	716	-73.78	GPI inositol-deacylase (AHRD V1 *-*- C5FP83_NANOT); contains Interpro domain(s) IPR012908 PGAP1-like
1_541_239(-)	Solyc04g015440.2.1	626	-57.12	Pentatricopeptide repeat-containing protein (AHRD V1 ***- D7L610_ARALY); contains Interpro domain(s) IPR002885 Pentatricopeptide repeat
1_541_239(-)	Solyc09g091910.1.1	575	-61.93	Purple acid phosphatase (AHRD V1 **** A5YBN1_TOBAC); contains Interpro domain(s) IPR015914 Purple acid phosphatase, N-terminal
1_541_239(-)	Solyc04g076910.2.1	586	-54.3	Symplekin (AHRD V1 *-*- B0WVE7_CULQU)
1_541_239(-)	Solyc01g110040.2.1	577	-57.2	Transducin family protein (AHRD V1 ***- D7L1V6_ARALY)
1_541_239(-)	Solyc01g111180.2.1	5922	-521.67	Unknown Protein (AHRD V1)
1_541_239(-)	Solyc01g110700.2.1	5370	-503.19	Unknown Protein (AHRD V1)
1_541_239(-)	Solyc04g055050.1.1	1035	-83.79	VQ motif family protein expressed (AHRD V1 *-*- Q10KE8_ORYSJ); contains Interpro domain(s) IPR008889 VQ
1_541_239(-)	Solyc01g007640.2.1	597	-60.29	Ycf2 (AHRD V1 ***- D2KLP5_OLEEU); contains Interpro domain(s) IPR008543 Chloroplast Ycf2
1_541_470(-)	Solyc07g049280.2.1	596	-65.24	Diphosphate-fructose-6-phosphate 1-phosphotransferase (AHRD V1 ***- D0TAW1_9BACE); contains Interpro domain(s) IPR011183 Pyrophosphate-dependent phosphofructokinase PfpB
1_541_470(-)	Solyc01g111080.2.1	872	-95.01	Gibberellin-regulated protein 2 (AHRD V1 *--- B6UGG6_MAIZE); contains Interpro domain(s) IPR003854 Gibberellin regulated protein
1_541_470(-)	Solyc07g061920.2.1	732	-90.24	Glucan synthase like 3 (AHRD V1 ***- D8R8I5_SELML); contains Interpro domain(s) IPR003440 Glycosyl transferase, family 48
1_541_470(-)	Solyc02g094100.2.1	601	-72.55	Katanin p60 ATPase-containing subunit (AHRD V1 *--- C0S965_PARBP); contains Interpro domain(s) IPR003959 ATPase, AAA-type, core
1_541_470(-)	Solyc04g072260.1.1	745	-96.55	Midasin (AHRD V1 ***- B9MXW7_POPTR); contains Interpro domain(s) IPR012099 Midasin
1_541_470(-)	Solyc01g099530.2.1	590	-54.64	Pentatricopeptide repeat-containing protein (AHRD V1 *-*- D7M6N0_ARALY); contains Interpro domain(s) IPR002885 Pentatricopeptide repeat
1_541_470(-)	Solyc03g094080.2.1	589	-56.41	Polyadenylate-binding protein family protein (AHRD V1 **** D7MT99_ARALY); contains Interpro domain(s) IPR000504 RNA recognition motif, RNP-1
1_541_470(-)	Solyc01g110040.2.1	879	-85.56	Transducin family protein (AHRD V1 ***- D7L1V6_ARALY)
1_541_470(-)	Solyc03g093480.2.1	589	-64.31	U3 small nucleolar RNA-associated protein 10 (AHRD V1 *--- C8VGG5_EMENI); contains Interpro domain(s) IPR012954 BP28, C-terminal
1_541_470(-)	Solyc01g111180.2.1	5282	-549.92	Unknown Protein (AHRD V1)
1_541_470(-)	Solyc01g110700.2.1	4974	-515.98	Unknown Protein (AHRD V1)
1_541_470(-)	Solyc06g019140.1.1	1020	-100.48	Unknown Protein (AHRD V1)
1_541_470(-)	Solyc07g020930.1.1	722	-78	Unknown Protein (AHRD V1)
1_541_470(-)	Solyc10g062300.1.1	722	-66.57	Unknown Protein (AHRD V1)
1_541_470(-)	Solyc10g062270.1.1	718	-68.25	Unknown Protein (AHRD V1)
1_541_470(-)	Solyc03g058550.1.1	590	-63.58	Unknown Protein (AHRD V1)
1_541_470(-)	Solyc07g020950.1.1	583	-51.05	Unknown Protein (AHRD V1)
1_541_470(-)	Solyc10g061920.1.1	578	-50.77	Unknown Protein (AHRD V1)
1_541_470(-)	Solyc11g045160.1.1	585	-69.18	Vacuolar sorting-associated protein (AHRD V1 *-*- C0NJR3_AJECG)
1_541_619(+)	Solyc09g074110.2.1	586	-53.9	AGAP009276-PA (Fragment) (AHRD V1 *--- Q7PVH5_ANOGA)
1_541_619(+)	Solyc01g059980.2.1	1457	-104.31	Beta-glucanase (AHRD V1 ***- Q53X08_NICPL); contains Interpro domain(s) IPR000490 Glycoside hydrolase, family 17
1_541_619(+)	Solyc03g118090.2.1	742	-54.95	Calcium-binding mitochondrial carrier protein SCaMC-1 (AHRD V1 **** B5X2X8_SALSA); contains Interpro domain(s) IPR002113 Adenine nucleotide translocator 1
1_541_619(+)	Solyc07g061710.1.1	571	-63.05	Carboxyl-terminal proteinase (AHRD V1 ***- B6SXW9_MAIZE); contains Interpro domain(s) IPR004314 Protein of unknown function DUF239, plant
1_541_619(+)	Solyc08g062920.2.1	737	-50.69	Elongation factor EF-2 (AHRD V1 **** Q9SGT4_ARATH); contains Interpro domain(s) IPR000795 Protein synthesis factor, GTP-binding
1_541_619(+)	Solyc01g044480.2.1	1028	-83.58	Elongation factor P (AHRD V1 ***- B6TAH3_MAIZE); contains Interpro domain(s) IPR008991 Translation protein SH3-like
1_541_619(+)	Solyc01g097720.1.1	1335	-88.13	Extensin-like protein Dif10 (Fragment) (AHRD V1 *-*- Q43504_SOLLC)
1_541_619(+)	Solyc01g097710.1.1	1188	-83.72	Extensin-like protein Dif10 (Fragment) (AHRD V1 *-*- Q43504_SOLLC)
1_541_619(+)	Solyc01g097680.2.1	1055	-71.75	Extensin-like protein Dif10 (Fragment) (AHRD V1 *-*- Q43504_SOLLC)
1_541_619(+)	Solyc01g097700.1.1	1035	-72.34	Extensin-like protein Dif10 (Fragment) (AHRD V1 *-*- Q43504_SOLLC)
1_541_619(+)	Solyc01g005880.1.1	739	-51.86	Extensin-like protein Dif10 (Fragment) (AHRD V1 *-*- Q43504_SOLLC)
1_541_619(+)	Solyc01g005850.1.1	1169	-64.42	Extensin-like protein Dif54 (AHRD V1 *-*- Q43505_SOLLC)
1_541_619(+)	Solyc03g082790.2.1	1011	-60.69	Extensin-like protein Dif54 (AHRD V1 *-*- Q43505_SOLLC)
1_541_619(+)	Solyc01g097690.2.1	1195	-87.59	Extensin-like protein Dif54 (AHRD V1 *-*- Q43505_SOLLC); contains Interpro domain(s) IPR006706 Extensin-like region
1_541_619(+)	Solyc01g006280.2.1	721	-50.76	Formate-tetrahydrofolate ligase (AHRD V1 ***- D0MR27_PHYIN); contains Interpro domain(s) IPR000559 Formate-tetrahydrofolate ligase, FTHFS
1_541_619(+)	Solyc12g038490.1.1	875	-82.31	Genomic DNA chromosome 5 P1 clone MXM12 (AHRD V1 *-*- Q9SD86_ARATH)
1_541_619(+)	Solyc06g048440.2.1	880	-60.62	GJ14616 (Fragment) (AHRD V1 ***- B4MH79_DROVI); contains Interpro domain(s) IPR010800 Glycine rich
1_541_619(+)	Solyc05g006180.2.1	586	-63.04	Histone acetyltransferase 5 (AHRD V1 ***- D7L0M4_ARALY); contains Interpro domain(s) IPR009255 Transcriptional coactivation
1_541_619(+)	Solyc04g072260.1.1	588	-50.35	Midasin (AHRD V1 ***- B9MXW7_POPTR); contains Interpro domain(s) IPR012099 Midasin
1_541_619(+)	Solyc02g061850.2.1	736	-60.92	Phospholipase D (AHRD V1 **** Q6AVR2_ORYSJ); contains Interpro domain(s) IPR011402 Phospholipase D, plant
1_541_619(+)	Solyc12g098780.1.1	1074	-81.05	Pistil extensin like protein (Fragment) (AHRD V1 *-*- Q40552_TOBAC); contains Interpro domain(s) IPR006041 Pollen Ole e 1 allergen and extensin
1_541_619(+)	Solyc04g015530.1.1	580	-55.08	Polygalacturonase A (AHRD V1 **** Q9M6S2_ACTCH); contains Interpro domain(s) IPR000408 Regulator of chromosome condensation, RCC1 IPR000743 Glycoside hydrolase, family 28
1_541_619(+)	Solyc08g074680.2.1	579	-52.83	Polyphenol oxidase (AHRD V1 *-*- Q41428_SOLTU); contains Interpro domain(s) IPR002227 Tyrosinase
1_541_619(+)	Solyc09g007340.2.1	587	-60.49	PWWP domain-containing protein (AHRD V1 *-*- D7L8B3_ARALY); contains Interpro domain(s) IPR000313 PWWP
1_541_619(+)	Solyc07g009110.1.1	880	-52.75	Response regulator 8 (AHRD V1 *-*- Q9AV93_MAIZE); contains Interpro domain(s) IPR006447 Myb-like DNA-binding region, SHAQKYF class
1_541_619(+)	Solyc07g062720.1.1	580	-84.42	RING-finger protein-like (AHRD V1 *-*- Q5QLR6_ORYSJ); contains Interpro domain(s) IPR018957 Zinc finger, C3HC4 RING-type
1_541_619(+)	Solyc01g059990.2.1	880	-62.03	Serine/threonine-protein phosphatase 7 long form homolog (AHRD V1 *--- PPP7L_ARATH); contains Interpro domain(s) IPR019557 Aminotransferase-like, plant mobile domain
1_541_619(+)	Solyc01g106940.2.1	1313	-63.88	Single myb histone 4 (Fragment) (AHRD V1 *--- A6MZD9_ORYSI); contains Interpro domain(s) IPR005818 Histone H1/H5
1_541_619(+)	Solyc05g009790.1.1	584	-53.68	Transcription factor (AHRD V1 *-** D6MKM9_9ASPA); contains Interpro domain(s) IPR003340 Transcriptional factor B3
1_541_619(+)	Solyc01g110040.2.1	991	-86.51	Transducin family protein (AHRD V1 ***- D7L1V6_ARALY)
1_541_619(+)	Solyc12g038700.1.1	1182	-106.91	Tyrosine-rich hydroxyproline-rich glycoprotein (Fragment) (AHRD V1 *-*- Q40793_PETCR); contains Interpro domain(s) IPR006706 Extensin-like region
1_541_619(+)	Solyc05g056060.2.1	585	-50.83	Ubiquitin-like protein (Fragment) (AHRD V1 *-*- A6N0B7_ORYSI); contains Interpro domain(s) IPR000626 Ubiquitin
1_541_619(+)	Solyc07g065630.2.1	740	-74.77	Ubiquitin-protein ligase 1 (AHRD V1 **** D7KN29_ARALY); contains Interpro domain(s) IPR000569 HECT
1_541_619(+)	Solyc05g014960.1.1	596	-57.06	Ulp1 protease family C-terminal catalytic domain containing protein (AHRD V1 *-*- Q60D46_SOLDE); contains Interpro domain(s) IPR003653 Peptidase C48, SUMO/Sentrin/Ubl1
1_541_619(+)	Solyc01g110700.2.1	13765	-975.29	Unknown Protein (AHRD V1)
1_541_619(+)	Solyc01g111180.2.1	12159	-872.66	Unknown Protein (AHRD V1)
1_541_619(+)	Solyc01g060150.2.1	879	-67.49	Unknown Protein (AHRD V1)
1_541_619(+)	Solyc07g041520.2.1	864	-67.96	Unknown Protein (AHRD V1)
1_541_619(+)	Solyc01g005890.1.1	732	-60.61	Unknown Protein (AHRD V1)
1_541_619(+)	Solyc01g107220.2.1	614	-50.5	Unknown Protein (AHRD V1)
1_541_619(+)	Solyc04g015800.1.1	607	-56.58	Unknown Protein (AHRD V1)
1_541_619(+)	Solyc04g015780.1.1	586	-56.43	Unknown Protein (AHRD V1)
1_541_619(+)	Solyc04g071080.1.1	1338	-137.18	Unknown Protein (AHRD V1); contains Interpro domain(s) IPR006706 Extensin-like region
1_541_619(+)	Solyc04g071070.2.1	1335	-117.63	Unknown Protein (AHRD V1); contains Interpro domain(s) IPR006706 Extensin-like region
1_541_619(+)	Solyc09g098510.2.1	748	-60.99	Unknown Protein (AHRD V1); contains Interpro domain(s) IPR006706 Extensin-like region
1_541_619(+)	Solyc12g038710.1.1	619	-60.98	Unknown Protein (AHRD V1); contains Interpro domain(s) IPR006706 Extensin-like region
1_541_619(+)	Solyc08g077500.2.1	752	-62.25	Vacuolar protein sorting-associated protein (AHRD V1 *-*- D3BBX0_POLPA); contains Interpro domain(s) IPR001849 Pleckstrin homology
1_541_619(+)	Solyc08g029050.2.1	600	-62.89	WD-repeat protein (AHRD V1 *--- A9FTS8_SORC5); contains Interpro domain(s) IPR017986 WD40 repeat, region
1_541_94(+)	Solyc02g081870.2.1	607	-59.12	ABC transporter G family member 31 (AHRD V1 ***- AB31G_ARATH); contains Interpro domain(s) IPR013525 ABC-2 type transporter
1_541_94(+)	Solyc01g106230.2.1	1033	-78.4	B3 domain-containing protein At5g60142 (AHRD V1 *-*- Y5142_ARATH); contains Interpro domain(s) IPR003340 Transcriptional factor B3
1_541_94(+)	Solyc01g059980.2.1	881	-86.16	Beta-glucanase (AHRD V1 ***- Q53X08_NICPL); contains Interpro domain(s) IPR000490 Glycoside hydrolase, family 17
1_541_94(+)	Solyc12g088920.1.1	595	-61.04	Calcineurin-like phosphoesterase family protein (AHRD V1 *-*- A9G786_SORC5); contains Interpro domain(s) IPR004843 Metallophosphoesterase
1_541_94(+)	Solyc11g062010.1.1	578	-51.4	Chromodomain-helicase-DNA-binding protein 1 (AHRD V1 *--- CHD1_DROME); contains Interpro domain(s) IPR000330 SNF2-related
1_541_94(+)	Solyc01g111080.2.1	707	-52.14	Gibberellin-regulated protein 2 (AHRD V1 *--- B6UGG6_MAIZE); contains Interpro domain(s) IPR003854 Gibberellin regulated protein
1_541_94(+)	Solyc05g018180.2.1	606	-54.9	Homology to unknown gene (AHRD V1 *--- Q01GH9_OSTTA); contains Interpro domain(s) IPR008528 Protein of unknown function DUF810
1_541_94(+)	Solyc01g067480.2.1	600	-50.1	Kelch-domain-containing protein (AHRD V1 *--- C5FLF8_NANOT); contains Interpro domain(s) IPR015915 Kelch-type beta propeller
1_541_94(+)	Solyc08g074680.2.1	613	-53.86	Polyphenol oxidase (AHRD V1 *-*- Q41428_SOLTU); contains Interpro domain(s) IPR002227 Tyrosinase
1_541_94(+)	Solyc01g059990.2.1	740	-75.05	Serine/threonine-protein phosphatase 7 long form homolog (AHRD V1 *--- PPP7L_ARATH); contains Interpro domain(s) IPR019557 Aminotransferase-like, plant mobile domain
1_541_94(+)	Solyc04g049580.2.1	1050	-72.47	Similarity the ORF shows strong similarity to EST 5419 - Aspergillus oryzae (AHRD V1 ***- A2Q8A7_ASPNC)
1_541_94(+)	Solyc01g110040.2.1	1028	-83.96	Transducin family protein (AHRD V1 ***- D7L1V6_ARALY)
1_541_94(+)	Solyc01g110700.2.1	8590	-716.3	Unknown Protein (AHRD V1)
1_541_94(+)	Solyc01g111180.2.1	8293	-664.16	Unknown Protein (AHRD V1)
1_541_94(+)	Solyc07g041520.2.1	765	-72.71	Unknown Protein (AHRD V1)
1_541_94(+)	Solyc05g050660.1.1	740	-50.51	Unknown Protein (AHRD V1)
1_541_94(+)	Solyc06g060420.2.1	587	-55.03	YbaK/prolyl-tRNA synthetase (AHRD V1 *-*- D0P7L2_BRUSU); contains Interpro domain(s) IPR007214 YbaK/aminoacyl-tRNA synthetase associated region
1_541_94(+)	Solyc01g007640.2.1	882	-76.17	Ycf2 (AHRD V1 ***- D2KLP5_OLEEU); contains Interpro domain(s) IPR008543 Chloroplast Ycf2
10_1305_229(+)	Solyc10g005920.2.1	598	-77.78	Enhancer of mRNA-decapping protein 4 (AHRD V1 *--- EDC4_DANRE); contains Interpro domain(s) IPR017986 WD40 repeat, region
10_1305_229(+)	Solyc02g078640.2.1	870	-113.46	Microtubule associated protein (AHRD V1 *--* A8J2Q6_CHLRE); contains Interpro domain(s) IPR011989 Armadillo-like helical
10_1305_229(+)	Solyc01g096200.2.1	582	-72.05	Pentatricopeptide repeat-containing protein (AHRD V1 *-*- D7M1E8_ARALY); contains Interpro domain(s) IPR011989 Armadillo-like helical
10_1305_229(+)	Solyc04g054140.2.1	591	-71.02	Ryanodine receptor (AHRD V1 *--- P91905_CAEEL); contains Interpro domain(s) IPR018355 SPla/RYanodine receptor subgroup
10_1305_229(+)	Solyc01g110700.2.1	2926	-371.83	Unknown Protein (AHRD V1)
10_1305_229(+)	Solyc01g111180.2.1	2648	-327.62	Unknown Protein (AHRD V1)
10_1305_229(+)	Solyc01g060150.2.1	750	-110.97	Unknown Protein (AHRD V1)
10_1305_229(+)	Solyc08g077500.2.1	734	-112.56	Vacuolar protein sorting-associated protein (AHRD V1 *-*- D3BBX0_POLPA); contains Interpro domain(s) IPR001849 Pleckstrin homology
10_1305_271(+)	Solyc02g081870.2.1	593	-66.26	ABC transporter G family member 31 (AHRD V1 ***- AB31G_ARATH); contains Interpro domain(s) IPR013525 ABC-2 type transporter
10_1305_271(+)	Solyc06g059910.2.1	1465	-138.94	Alpha-humulene/(-)-(E)-beta-caryophyllene synthase (AHRD V1 **** HUMS_ARATH); contains Interpro domain(s) IPR005630 Terpene synthase, metal-binding domain
10_1305_271(+)	Solyc01g059980.2.1	2039	-200.77	Beta-glucanase (AHRD V1 ***- Q53X08_NICPL); contains Interpro domain(s) IPR000490 Glycoside hydrolase, family 17
10_1305_271(+)	Solyc01g098430.2.1	577	-56.84	Breast carcinoma amplified sequence 3 (Fragment) (AHRD V1 *--- B1AR77_MOUSE); contains Interpro domain(s) IPR011046 WD40 repeat-like
10_1305_271(+)	Solyc07g054370.2.1	602	-61.58	F-box/LRR-repeat protein At3g59200 (AHRD V1 ***- FBL64_ARATH); contains Interpro domain(s) IPR013596 FBD
10_1305_271(+)	Solyc02g082280.2.1	579	-63	Genomic DNA chromosome 5 TAC clone K2A18 (AHRD V1 **-- Q9FKY7_ARATH); contains Interpro domain(s) IPR012880 Protein of unknown function DUF1683, C-terminal
10_1305_271(+)	Solyc01g111080.2.1	1310	-141.51	Gibberellin-regulated protein 2 (AHRD V1 *--- B6UGG6_MAIZE); contains Interpro domain(s) IPR003854 Gibberellin regulated protein
10_1305_271(+)	Solyc05g015920.2.1	585	-60.41	GYF domain-containing protein (AHRD V1 ***- D7KBQ1_ARALY); contains Interpro domain(s) IPR003169 GYF
10_1305_271(+)	Solyc01g099190.2.1	898	-81.37	Lipoxygenase (AHRD V1 **** Q42873_SOLLC); contains Interpro domain(s) IPR001246 Lipoxygenase, plant
10_1305_271(+)	Solyc04g007710.2.1	585	-74.19	Mitogen-activated protein kinase (AHRD V1 ***- Q1W2K7_WHEAT); contains Interpro domain(s) IPR002290 Serine/threonine protein kinase
10_1305_271(+)	Solyc05g018320.2.1	571	-59.45	Ninja-family protein Os05g0558800 (AHRD V1 ***- NNJA4_ORYSJ); contains Interpro domain(s) IPR012463 Protein of unknown function DUF1675
10_1305_271(+)	Solyc09g018160.2.1	575	-61.72	Os12g0114200 protein (Fragment) (AHRD V1 *--- Q0IQL4_ORYSJ)
10_1305_271(+)	Solyc02g080210.2.1	748	-78.96	Pectinesterase (AHRD V1 ***- B9RXQ4_RICCO); contains Interpro domain(s) IPR000070 Pectinesterase, catalytic
10_1305_271(+)	Solyc01g007950.2.1	589	-58.96	Peroxidase 1 (AHRD V1 *-*- B6T173_MAIZE); contains Interpro domain(s) IPR000823 Plant peroxidase
10_1305_271(+)	Solyc03g094080.2.1	573	-58.48	Polyadenylate-binding protein family protein (AHRD V1 **** D7MT99_ARALY); contains Interpro domain(s) IPR000504 RNA recognition motif, RNP-1
10_1305_271(+)	Solyc07g006030.2.1	589	-57.33	Protein TIF31 homolog (AHRD V1 *--- TIF31_COCIM); contains Interpro domain(s) IPR011990 Tetratricopeptide-like helical
10_1305_271(+)	Solyc01g111440.2.1	748	-82.35	Senescence-associated protein 12 (AHRD V1 *-*- O81657_HEMSP); contains Interpro domain(s) IPR009686 Senescence-associated
10_1305_271(+)	Solyc01g059990.2.1	865	-85.86	Serine/threonine-protein phosphatase 7 long form homolog (AHRD V1 *--- PPP7L_ARATH); contains Interpro domain(s) IPR019557 Aminotransferase-like, plant mobile domain
10_1305_271(+)	Solyc03g005550.2.1	733	-57.23	Serine/threonine-protein phosphatase 7 long form homolog (AHRD V1 **-- PPP7L_ARATH); contains Interpro domain(s) IPR019557 Aminotransferase-like, plant mobile domain
10_1305_271(+)	Solyc07g062700.2.1	619	-60.97	Sodium/calcium exchanger family protein (AHRD V1 ***- D7KKF3_ARALY); contains Interpro domain(s) IPR004837 Sodium/calcium exchanger membrane region
10_1305_271(+)	Solyc10g084760.1.1	579	-71.63	Ubiquitin ligase E3 (Fragment) (AHRD V1 *-*- Q16LM2_AEDAE); contains Interpro domain(s) IPR013993 Zinc finger, N-recognin, metazoa
10_1305_271(+)	Solyc01g110700.2.1	8953	-819.57	Unknown Protein (AHRD V1)
10_1305_271(+)	Solyc01g111180.2.1	7190	-664.11	Unknown Protein (AHRD V1)
10_1305_271(+)	Solyc12g036080.1.1	897	-79.81	Unknown Protein (AHRD V1)
10_1305_271(+)	Solyc01g060150.2.1	748	-70.47	Unknown Protein (AHRD V1)
10_1305_271(+)	Solyc07g055910.2.1	584	-60.11	Unknown Protein (AHRD V1)
10_1305_271(+)	Solyc01g096110.2.1	741	-68.49	WD repeat protein (AHRD V1 *--- A1CP90_ASPCL); contains Interpro domain(s) IPR017986 WD40 repeat, region
10_1305_271(+)	Solyc05g054420.2.1	576	-53.56	X1 (Fragment) (AHRD V1 *-*- Q3T7E6_ZEAMM); contains Interpro domain(s) IPR005380 Region of unknown function XS
10_1305_332(-)	Solyc06g059910.2.1	909	-73.31	Alpha-humulene/(-)-(E)-beta-caryophyllene synthase (AHRD V1 **** HUMS_ARATH); contains Interpro domain(s) IPR005630 Terpene synthase, metal-binding domain
10_1305_332(-)	Solyc01g059980.2.1	1027	-60.9	Beta-glucanase (AHRD V1 ***- Q53X08_NICPL); contains Interpro domain(s) IPR000490 Glycoside hydrolase, family 17
10_1305_332(-)	Solyc07g006300.2.1	744	-58.78	CER1 protein (Fragment) (AHRD V1 *--- Q0WLZ2_ARATH); contains Interpro domain(s) IPR006694 Fatty acid hydroxylase
10_1305_332(-)	Solyc01g111080.2.1	1029	-83.63	Gibberellin-regulated protein 2 (AHRD V1 *--- B6UGG6_MAIZE); contains Interpro domain(s) IPR003854 Gibberellin regulated protein
10_1305_332(-)	Solyc01g059990.2.1	876	-53.06	Serine/threonine-protein phosphatase 7 long form homolog (AHRD V1 *--- PPP7L_ARATH); contains Interpro domain(s) IPR019557 Aminotransferase-like, plant mobile domain
10_1305_332(-)	Solyc01g106940.2.1	1324	-90.48	Single myb histone 4 (Fragment) (AHRD V1 *--- A6MZD9_ORYSI); contains Interpro domain(s) IPR005818 Histone H1/H5
10_1305_332(-)	Solyc01g110700.2.1	9566	-695.28	Unknown Protein (AHRD V1)
10_1305_332(-)	Solyc01g111180.2.1	9258	-678.91	Unknown Protein (AHRD V1)
10_1305_332(-)	Solyc07g052710.1.1	846	-54.87	Unknown Protein (AHRD V1)
10_1305_395(-)	Solyc08g006880.2.1	583	-53.84	ABC transporter C family member 2 (AHRD V1 **-- AB2C_ARATH); contains Interpro domain(s) IPR001140 ABC transporter, transmembrane region
10_1305_395(-)	Solyc12g056940.1.1	731	-66.47	Acetyl-CoA carboxylase (AHRD V1 ***- D2CFN2_9ROSI); contains Interpro domain(s) IPR013537 Acetyl-CoA carboxylase, central region
10_1305_395(-)	Solyc06g059910.2.1	713	-59.45	Alpha-humulene/(-)-(E)-beta-caryophyllene synthase (AHRD V1 **** HUMS_ARATH); contains Interpro domain(s) IPR005630 Terpene synthase, metal-binding domain
10_1305_395(-)	Solyc05g015040.2.1	581	-59.5	ATP-dependent RNA helicase (AHRD V1 **** Q16PT8_AEDAE); contains Interpro domain(s) IPR014001 DEAD-like helicase, N-terminal
10_1305_395(-)	Solyc06g008810.2.1	871	-67.67	Auxin F-box protein 5 (AHRD V1 **-- D7MPH1_ARALY); contains Interpro domain(s) IPR006553 Leucine-rich repeat, cysteine-containing subtype
10_1305_395(-)	Solyc01g059980.2.1	575	-52.4	Beta-glucanase (AHRD V1 ***- Q53X08_NICPL); contains Interpro domain(s) IPR000490 Glycoside hydrolase, family 17
10_1305_395(-)	Solyc06g008210.2.1	594	-58.69	Breast cancer type 1 susceptibility protein homolog (Fragment) (AHRD V1 *--- A5A751_PIG); contains Interpro domain(s) IPR001357 BRCT
10_1305_395(-)	Solyc01g111080.2.1	748	-57.58	Gibberellin-regulated protein 2 (AHRD V1 *--- B6UGG6_MAIZE); contains Interpro domain(s) IPR003854 Gibberellin regulated protein
10_1305_395(-)	Solyc02g062360.2.1	581	-52.37	Histone-lysine N-methyltransferase NSD3 (AHRD V1 *--- NSD3_HUMAN); contains Interpro domain(s) IPR018144 Plus-3 domain, subgroup
10_1305_395(-)	Solyc09g066140.2.1	1003	-77.01	IFA binding protein (AHRD V1 *--- A6MGY3_LILLO); contains Interpro domain(s) IPR007656 Protein of unknown function DUF593
10_1305_395(-)	Solyc01g106500.2.1	586	-52	LRR receptor-like serine/threonine-protein kinase, RLP
10_1305_395(-)	Solyc08g006420.2.1	578	-52.01	Myosin-like protein (Fragment) (AHRD V1 *-*- Q84VD2_ORYSJ)
10_1305_395(-)	Solyc08g067920.2.1	581	-54.37	Nucleic acid binding protein (AHRD V1 *--- D7M9R5_ARALY); contains Interpro domain(s) IPR019542 Enhancer of polycomb-like
10_1305_395(-)	Solyc09g092100.2.1	878	-83.75	Predicted CDS Pa_5_8110 (Fragment) (AHRD V1 *--- B2AKK2_PODAN); contains Interpro domain(s) IPR003594 ATP-binding region, ATPase-like
10_1305_395(-)	Solyc06g071620.2.1	577	-59.84	Related to ATP dependent RNA helicase (AHRD V1 **-* Q6MV07_NEUCR); contains Interpro domain(s) IPR004179 Sec63 domain
10_1305_395(-)	Solyc01g110040.2.1	585	-55.73	Transducin family protein (AHRD V1 ***- D7L1V6_ARALY)
10_1305_395(-)	Solyc04g076620.2.1	579	-55.9	Ubiquitin-protein ligase 1 (AHRD V1 *-** D7KN29_ARALY); contains Interpro domain(s) IPR000569 HECT
10_1305_395(-)	Solyc01g111180.2.1	7564	-688.01	Unknown Protein (AHRD V1)
10_1305_395(-)	Solyc01g110700.2.1	7127	-637.67	Unknown Protein (AHRD V1)
10_1305_395(-)	Solyc01g088200.2.1	587	-50.55	#N/A
10_1305_395(-)	Solyc01g088230.2.1	587	-50.55	#N/A
10_1305_418(+)	Solyc01g059980.2.1	746	-82.94	Beta-glucanase (AHRD V1 ***- Q53X08_NICPL); contains Interpro domain(s) IPR000490 Glycoside hydrolase, family 17
10_1305_418(+)	Solyc01g008350.2.1	767	-99.38	DNAJ heat shock N-terminal domain-containing protein-like (AHRD V1 ***- Q5QMD6_ORYSJ)
10_1305_418(+)	Solyc01g068480.2.1	750	-86.62	Embryo defective 2765 (Fragment) (AHRD V1 *-*- D3U0D1_9MAGN)
10_1305_418(+)	Solyc03g123440.2.1	576	-68.55	HhH-GPD family protein (AHRD V1 *--- D1CFH3_THET1); contains Interpro domain(s) IPR003265 HhH-GPD domain
10_1305_418(+)	Solyc12g017390.1.1	592	-65.52	Protein kinase (AHRD V1 ***- Q41297_9SOLN); contains Interpro domain(s) IPR002290 Serine/threonine protein kinase
10_1305_418(+)	Solyc01g008080.2.1	577	-65.9	Ribosomal protein S27 (AHRD V1 ***- Q3HVK9_SOLTU); contains Interpro domain(s) IPR000592 Ribosomal protein S27e
10_1305_418(+)	Solyc01g110700.2.1	3653	-409.05	Unknown Protein (AHRD V1)
10_1305_418(+)	Solyc01g111180.2.1	3357	-379.25	Unknown Protein (AHRD V1)
10_1305_481(+)	Solyc01g088170.2.1	583	-50.59	Aldehyde oxidase (AHRD V1 ***- Q9FV24_SOLLC); contains Interpro domain(s) IPR002346 Molybdopterin dehydrogenase, FAD-binding
10_1305_481(+)	Solyc06g059910.2.1	1019	-59.55	Alpha-humulene/(-)-(E)-beta-caryophyllene synthase (AHRD V1 **** HUMS_ARATH); contains Interpro domain(s) IPR005630 Terpene synthase, metal-binding domain
10_1305_481(+)	Solyc06g008500.2.1	584	-60.08	Ankyrin repeat-containing protein (AHRD V1 *-*- D2Y4N3_TOBAC); contains Interpro domain(s) IPR002110 Ankyrin
10_1305_481(+)	Solyc01g059980.2.1	1486	-97.79	Beta-glucanase (AHRD V1 ***- Q53X08_NICPL); contains Interpro domain(s) IPR000490 Glycoside hydrolase, family 17
10_1305_481(+)	Solyc01g096830.2.1	599	-52.71	Calcium-transporting ATPase 1 (AHRD V1 *-** ATC1_YEAST); contains Interpro domain(s) IPR006544 ATPase, P-type, unknown pump specificity (type V)
10_1305_481(+)	Solyc09g082690.2.1	726	-53.1	Early light-induced protein 7 (AHRD V1 ***- B2BJD6_RHOCT)
10_1305_481(+)	Solyc01g111080.2.1	1457	-106.95	Gibberellin-regulated protein 2 (AHRD V1 *--- B6UGG6_MAIZE); contains Interpro domain(s) IPR003854 Gibberellin regulated protein
10_1305_481(+)	Solyc04g076350.1.1	584	-54.72	Kinase interacting protein 1 (AHRD V1 *-*- Q94CG5_PETIN); contains Interpro domain(s) IPR011684 KIP1-like
10_1305_481(+)	Solyc10g008210.2.1	890	-110.79	Os07g0507200 protein (Fragment) (AHRD V1 *-*- C7J530_ORYSJ); contains Interpro domain(s) IPR009675 Targeting for Xklp2
10_1305_481(+)	Solyc06g068320.2.1	590	-55.3	Prolyl-tRNA synthetase (AHRD V1 **** Q54Q07_DICDI); contains Interpro domain(s) IPR004499 Prolyl-tRNA synthetase, class IIa, prokaryotic-type
10_1305_481(+)	Solyc11g020990.1.1	580	-59.31	Proteinase inhibitor II (AHRD V1 ***- B3F0C1_TOBAC); contains Interpro domain(s) IPR003465 Proteinase inhibitor I20, Pin2
10_1305_481(+)	Solyc01g111440.2.1	1160	-66.9	Senescence-associated protein 12 (AHRD V1 *-*- O81657_HEMSP); contains Interpro domain(s) IPR009686 Senescence-associated
10_1305_481(+)	Solyc01g059990.2.1	1024	-57.13	Serine/threonine-protein phosphatase 7 long form homolog (AHRD V1 *--- PPP7L_ARATH); contains Interpro domain(s) IPR019557 Aminotransferase-like, plant mobile domain
10_1305_481(+)	Solyc01g110700.2.1	15606	-988.32	Unknown Protein (AHRD V1)
10_1305_481(+)	Solyc01g111180.2.1	15158	-972.22	Unknown Protein (AHRD V1)
10_1305_481(+)	Solyc09g009370.2.1	734	-58.3	Vacuolar protein sorting-associated protein (AHRD V1 *-*- Q2UJU9_ASPOR); contains Interpro domain(s) IPR009291 Protein of unknown function DUF946, plant
11_127_91(+)	Solyc08g076320.2.1	581	-62.79	Cellulose synthase-like protein (AHRD V1 **** B9IPJ4_POPTR); contains Interpro domain(s) IPR005150 Cellulose synthase
11_127_91(+)	Solyc07g064700.2.1	584	-59.35	DNA-binding bromodomain-containing protein (AHRD V1 *-** D7KJ43_ARALY); contains Interpro domain(s) IPR001487 Bromodomain
11_127_91(+)	Solyc01g068480.2.1	740	-64.22	Embryo defective 2765 (Fragment) (AHRD V1 *-*- D3U0D1_9MAGN)
11_127_91(+)	Solyc04g071350.2.1	581	-55.6	Exocyst complex component 2 (AHRD V1 ***- Q6PGY8_DANRE)
11_127_91(+)	Solyc01g081430.2.1	592	-64.3	Expressed protein (Fragment) (AHRD V1 ***- Q108V0_ORYSJ)
11_127_91(+)	Solyc02g014190.2.1	749	-85.04	Genomic DNA chromosome 5 P1 clone MYJ24 (AHRD V1 **-- Q9FN44_ARATH); contains Interpro domain(s) IPR003594 ATP-binding region, ATPase-like
11_127_91(+)	Solyc01g008120.2.1	764	-84.18	Histone acetyltransferase (AHRD V1 **** B9HG17_POPTR); contains Interpro domain(s) IPR009255 Transcriptional coactivation
11_127_91(+)	Solyc06g036720.2.1	592	-58.76	HLA-B associated transcript 3 (Fragment) (AHRD V1 *--- Q5STC0_HUMAN); contains Interpro domain(s) IPR019956 Ubiquitin subgroup
11_127_91(+)	Solyc12g009510.1.1	586	-59.94	LRR receptor-like serine/threonine-protein kinase, RLP
11_127_91(+)	Solyc10g084090.1.1	742	-98.4	Pentatricopeptide repeat-containing protein (AHRD V1 *-*- D7LF08_ARALY); contains Interpro domain(s) IPR002885 Pentatricopeptide repeat
11_127_91(+)	Solyc02g077680.2.1	578	-65.23	Phosphorylase (AHRD V1 **** B9H2Q8_POPTR); contains Interpro domain(s) IPR011833 Glycogen/starch/alpha-glucan phosphorylase
11_127_91(+)	Solyc03g062650.2.1	611	-62.2	Thyroid adenoma-associated protein homolog (AHRD V1 *--- THADA_CANFA); contains Interpro domain(s) IPR019442 Protein of unknown function DUF2428, death-receptor-like
11_127_91(+)	Solyc01g110040.2.1	573	-50.62	Transducin family protein (AHRD V1 ***- D7L1V6_ARALY)
11_127_91(+)	Solyc06g053750.2.1	597	-64.73	Ubiquitin carboxyl-terminal hydrolase family protein expressed (AHRD V1 *--- Q2R2A3_ORYSJ); contains Interpro domain(s) IPR002083 MATH
11_127_91(+)	Solyc12g100000.1.1	575	-58.74	U-box domain-containing protein 4 (AHRD V1 **-- PUB4_ARATH); contains Interpro domain(s) IPR011989 Armadillo-like helical
11_127_91(+)	Solyc01g044430.1.1	597	-62.6	Ulp1 protease family C-terminal catalytic domain containing protein (AHRD V1 *-*- Q60D46_SOLDE); contains Interpro domain(s) IPR003653 Peptidase C48, SUMO/Sentrin/Ubl1
11_127_91(+)	Solyc07g066500.1.1	600	-63.98	Ulp1 protease family C-terminal catalytic domain containing protein (AHRD V1 *-*- Q60D46_SOLDE); contains Interpro domain(s) IPR015410 Region of unknown function DUF1985
11_127_91(+)	Solyc01g110700.2.1	3235	-338.81	Unknown Protein (AHRD V1)
11_127_91(+)	Solyc01g111180.2.1	3068	-320.14	Unknown Protein (AHRD V1)
11_127_91(+)	Solyc08g077500.2.1	596	-66.56	Vacuolar protein sorting-associated protein (AHRD V1 *-*- D3BBX0_POLPA); contains Interpro domain(s) IPR001849 Pleckstrin homology
11_127_91(+)	Solyc09g009370.2.1	724	-77.52	Vacuolar protein sorting-associated protein (AHRD V1 *-*- Q2UJU9_ASPOR); contains Interpro domain(s) IPR009291 Protein of unknown function DUF946, plant
11_131_361(+)	Solyc01g105460.2.1	594	-58.44	1 4-dihydroxy-2-naphthoate octaprenyltransferase (AHRD V1 **** B6UA12_MAIZE); contains Interpro domain(s) IPR011937 1,4-dihydroxy-2-naphthoate phytyltransferase
11_131_361(+)	Solyc06g074960.2.1	592	-51.14	ABC transporter G family member 3 (AHRD V1 *--- AB3G_ARATH); contains Interpro domain(s) IPR000374 Phosphatidate cytidylyltransferase
11_131_361(+)	Solyc12g088010.1.1	607	-62.92	Aberrant pollen transmission 1 (AHRD V1 **-- Q4JQG0_MAIZE); contains Interpro domain(s) IPR019443 Protein of unknown function FMP27, domain-6, C-terminal
11_131_361(+)	Solyc06g066090.2.1	596	-63.52	AFG1-family ATPase (AHRD V1 *-** D1CU44_9RHIZ); contains Interpro domain(s) IPR005654 ATPase, AFG1-like
11_131_361(+)	Solyc09g074110.2.1	885	-76.07	AGAP009276-PA (Fragment) (AHRD V1 *--- Q7PVH5_ANOGA)
11_131_361(+)	Solyc01g006640.1.1	905	-79.07	AMP-dependent synthetase and ligase (AHRD V1 *--- B2J012_NOSP7); contains Interpro domain(s) IPR011614 Catalase, N-terminal
11_131_361(+)	Solyc10g045220.1.1	598	-59.27	Apocytochrome f (AHRD V1 ***- D3WBH0_9AQUA); contains Interpro domain(s) IPR002325 Cytochrome f
11_131_361(+)	Solyc09g064780.2.1	600	-61.53	At2g23590-like protein (Fragment) (AHRD V1 *-*- B2CXK6_CARAS)
11_131_361(+)	Solyc03g020020.2.1	892	-91.91	AT3G05680-like protein (Fragment) (AHRD V1 *-*- D6PPW0_9BRAS)
11_131_361(+)	Solyc08g077420.2.1	588	-70.6	ATP dependent helicase (AHRD V1 **-* A8NEE6_COPC7); contains Interpro domain(s) IPR018999 RNA helicase UPF1, UPF2-interacting domain
11_131_361(+)	Solyc11g010310.1.1	575	-57.64	ATP dependent RNA helicase (AHRD V1 *-*- B8BR58_THAPS); contains Interpro domain(s) IPR014001 DEAD-like helicase, N-terminal
11_131_361(+)	Solyc01g099460.1.1	597	-54.05	ATP-dependent DNA helicase (AHRD V1 *-*- D8G648_9CYAN); contains Interpro domain(s) IPR004589 DNA helicase, ATP-dependent, RecQ type
11_131_361(+)	Solyc03g118920.2.1	590	-65.79	ATP-dependent RNA helicase A-like protein (AHRD V1 ***- Q9FF84_ARATH); contains Interpro domain(s) IPR011545 DNA/RNA helicase, DEAD/DEAH box type, N-terminal
11_131_361(+)	Solyc04g076500.2.1	752	-72.16	BEACH domain-containing protein (AHRD V1 **-- D3BT75_POLPA); contains Interpro domain(s) IPR008985 Concanavalin A-like lectin/glucanase
11_131_361(+)	Solyc09g065700.2.1	887	-92.5	Beige/BEACH domain containing protein (AHRD V1 *--- A8PYX1_BRUMA); contains Interpro domain(s) IPR000409 Beige/BEACH
11_131_361(+)	Solyc01g059980.2.1	878	-96.79	Beta-glucanase (AHRD V1 ***- Q53X08_NICPL); contains Interpro domain(s) IPR000490 Glycoside hydrolase, family 17
11_131_361(+)	Solyc02g092920.2.1	615	-60.73	Cadmium-transporting ATPase (AHRD V1 ***- Q5WLE3_BACSK); contains Interpro domain(s) IPR006404 ATPase, P-type, heavy metal-(Cd/Co/Hg/Pb/Zn)-translocating
11_131_361(+)	Solyc06g068700.2.1	585	-52.63	Calcium-binding protein Calnexin (AHRD V1 **-* Q9BLH3_HALRO); contains Interpro domain(s) IPR001580 Calreticulin/calnexin
11_131_361(+)	Solyc01g058270.2.1	586	-57.11	CAS1 domain containing 1 (AHRD V1 **-- B0W8N6_CULQU); contains Interpro domain(s) IPR012419 Cas1p-like
11_131_361(+)	Solyc02g024070.2.1	585	-65.33	Class III homeodomain-leucine zipper (AHRD V1 ***- Q1WD30_GINBI); contains Interpro domain(s) IPR013978 MEKHLA
11_131_361(+)	Solyc03g096000.2.1	756	-74.36	Clathrin heavy chain (AHRD V1 ***- Q39834_SOYBN); contains Interpro domain(s) IPR016341 Clathrin, heavy chain
11_131_361(+)	Solyc06g051310.2.1	591	-56.72	Clathrin heavy chain (AHRD V1 ***- Q39834_SOYBN); contains Interpro domain(s) IPR016341 Clathrin, heavy chain
11_131_361(+)	Solyc03g007100.2.1	736	-60.6	Cleavage and polyadenylation specificity factor subunit A (AHRD V1 *--- C1H240_PARBA); contains Interpro domain(s) IPR004871 Cleavage and polyadenylation specificity factor, A subunit, C-terminal
11_131_361(+)	Solyc08g074370.2.1	582	-60.49	DDB1- and CUL4-associated factor homolog 1 (AHRD V1 **-- DCAF1_ARATH); contains Interpro domain(s) IPR017986 WD40 repeat, region
11_131_361(+)	Solyc03g110880.2.1	873	-80.66	DNA-directed RNA polymerase (AHRD V1 ***- B9IL57_POPTR); contains Interpro domain(s) IPR015712 DNA-directed RNA polymerase, subunit 2
11_131_361(+)	Solyc02g089260.2.1	576	-57.21	E3 ubiquitin-protein ligase UBR4 (AHRD V1 *--- UBR4_HUMAN); contains Interpro domain(s) IPR013993 Zinc finger, N-recognin, metazoa
11_131_361(+)	Solyc01g081430.2.1	729	-73.11	Expressed protein (Fragment) (AHRD V1 ***- Q108V0_ORYSJ)
11_131_361(+)	Solyc03g119750.2.1	584	-58.68	Family with sequence similarity 116 member B (Fragment) (AHRD V1 *--- A6X8I4_HUMAN); contains Interpro domain(s) IPR012860 Protein of unknown function DUF1630
11_131_361(+)	Solyc02g014190.2.1	1035	-106.21	Genomic DNA chromosome 5 P1 clone MYJ24 (AHRD V1 **-- Q9FN44_ARATH); contains Interpro domain(s) IPR003594 ATP-binding region, ATPase-like
11_131_361(+)	Solyc01g111080.2.1	895	-85.38	Gibberellin-regulated protein 2 (AHRD V1 *--- B6UGG6_MAIZE); contains Interpro domain(s) IPR003854 Gibberellin regulated protein
11_131_361(+)	Solyc05g012380.2.1	729	-68.41	Glucan endo-1 3-beta-glucosidase 1 (AHRD V1 *-*- B6TW10_MAIZE); contains Interpro domain(s) IPR012946 X8
11_131_361(+)	Solyc04g079900.2.1	572	-57.3	GP63 leishmanolysin (Metallo-peptidase clan ma(M) family m8) (AHRD V1 *--- A4H637_LEIBR); contains Interpro domain(s) IPR001577 Peptidase M8, leishmanolysin
11_131_361(+)	Solyc03g114410.2.1	576	-56.1	G-patch domain-containing protein (AHRD V1 *-*- C5GVR1_AJEDR); contains Interpro domain(s) IPR011666 Protein of unknown function DUF1604
11_131_361(+)	Solyc02g087250.2.1	729	-65.09	Group II intron splicing factor CRS1-like (AHRD V1 *--- Q5JK63_ORYSJ); contains Interpro domain(s) IPR001890 RNA-binding, CRM domain
11_131_361(+)	Solyc03g006480.1.1	893	-86.32	Helicase sen1 (AHRD V1 *--- B6K1Y0_SCHJY); contains Interpro domain(s) IPR014016 Helicase, superfamily 1, UvrD-related
11_131_361(+)	Solyc09g065550.2.1	586	-68.55	Kinase interacting family protein (AHRD V1 *--- D7KCB2_ARALY); contains Interpro domain(s) IPR011684 KIP1-like
11_131_361(+)	Solyc04g040110.2.1	574	-67.42	Kinesin-like protein (AHRD V1 *-*- Q9S7P3_ARATH); contains Interpro domain(s) IPR001752 Kinesin, motor region
11_131_361(+)	Solyc04g056640.1.1	736	-57.66	LRR receptor-like serine/threonine-protein kinase, RLP
11_131_361(+)	Solyc02g063210.1.1	595	-59.85	LRR receptor-like serine/threonine-protein kinase, RLP
11_131_361(+)	Solyc01g094620.2.1	749	-82.25	Mediator of RNA polymerase II transcription subunit 12 (AHRD V1 *--- B2G3S6_ZYGRO); contains Interpro domain(s) IPR019035 Mediator complex, subunit Med12
11_131_361(+)	Solyc07g008950.2.1	589	-59.62	Methionyl-tRNA synthetase (AHRD V1 ***- B2W192_PYRTR); contains Interpro domain(s) IPR015413 Aminoacyl-tRNA synthetase, class I (M)
11_131_361(+)	Solyc04g072260.1.1	573	-52.31	Midasin (AHRD V1 ***- B9MXW7_POPTR); contains Interpro domain(s) IPR012099 Midasin
11_131_361(+)	Solyc12g015640.1.1	589	-61.14	Mitochondrial transcription termination factor (Fragment) (AHRD V1 *--- C6FB12_PSEMZ); contains Interpro domain(s) IPR003690 Mitochodrial transcription termination factor-related
11_131_361(+)	Solyc01g094960.2.1	603	-54.2	Mitogen-activated protein kinase 4 (AHRD V1 **** D7R517_SOLLC); contains Interpro domain(s) IPR008351 JNK MAP kinase
11_131_361(+)	Solyc08g006420.2.1	594	-57.27	Myosin-like protein (Fragment) (AHRD V1 *-*- Q84VD2_ORYSJ)
11_131_361(+)	Solyc04g082490.2.1	590	-55.94	Niemann-Pick C1 protein (AHRD V1 **-- C5FQM2_NANOT); contains Interpro domain(s) IPR004765 Niemann-Pick C type protein
11_131_361(+)	Solyc02g089360.2.1	603	-62.32	Nuclear inhibitor of protein phosphatase 1 (AHRD V1 *--- Q9V7W9_DROME); contains Interpro domain(s) IPR000253 Forkhead-associated
11_131_361(+)	Solyc01g102540.2.1	728	-66.74	Nucleoporin (AHRD V1 *-*- C0KG86_DROSI)
11_131_361(+)	Solyc08g083060.2.1	593	-53.42	Oligopeptide transporter (Fragment) (AHRD V1 **** B0DAK3_LACBS); contains Interpro domain(s) IPR004813 Oligopeptide transporter OPT superfamily
11_131_361(+)	Solyc01g107200.2.1	565	-54.67	Os02g0794300 protein (Fragment) (AHRD V1 *-*- Q0DWU9_ORYSJ); contains Interpro domain(s) IPR007573 Protein of unknown function DUF566
11_131_361(+)	Solyc01g094050.1.1	727	-71.71	Os04g0555600 protein (Fragment) (AHRD V1 ***- Q0JB55_ORYSJ)
11_131_361(+)	Solyc10g079410.1.1	750	-77.23	Patatin-like phospholipase domain-containing protein c (AHRD V1 *--- B6K1H8_SCHJY); contains Interpro domain(s) IPR006689 ARF/SAR superfamily
11_131_361(+)	Solyc03g116840.1.1	586	-57.24	Pentatricopeptide repeat-containing protein (AHRD V1 *-*- D7KHY5_ARALY); contains Interpro domain(s) IPR008906 HAT dimerisation
11_131_361(+)	Solyc06g009500.1.1	573	-60.27	Pentatricopeptide repeat-containing protein (AHRD V1 ***- D7L041_ARALY); contains Interpro domain(s) IPR002885 Pentatricopeptide repeat
11_131_361(+)	Solyc05g013400.2.1	580	-52.42	Pentatricopeptide repeat-containing protein (AHRD V1 ***- D7MDP3_ARALY); contains Interpro domain(s) IPR002885 Pentatricopeptide repeat
11_131_361(+)	Solyc02g093380.1.1	587	-57.92	Pentatricopeptide repeat-containing protein (AHRD V1 ***- D7MJP3_ARALY); contains Interpro domain(s) IPR002885 Pentatricopeptide repeat
11_131_361(+)	Solyc04g005330.2.1	596	-59.1	Periodic tryptophan protein 1 homolog (AHRD V1 **-- C1BVG9_9MAXI); contains Interpro domain(s) IPR020472 G-protein beta WD-40 repeat, region
11_131_361(+)	Solyc05g005640.2.1	740	-83.23	PHD finger family protein / methyl-CpG binding domain-containing protein (ISS) (AHRD V1 *--* Q01B57_OSTTA); contains Interpro domain(s) IPR019787 Zinc finger, PHD-finger
11_131_361(+)	Solyc07g055060.2.1	586	-58.45	Phosphoenolpyruvate carboxylase 1 (AHRD V1 ***- O23946_GOSHI); contains Interpro domain(s) IPR015813 Pyruvate/Phosphoenolpyruvate kinase, catalytic core IPR001449 Phosphoenolpyruvate carboxylase
11_131_361(+)	Solyc09g064230.1.1	591	-57.84	Phosphoribosylanthranilate transferase (Fragment) (AHRD V1 *--- Q43085_PEA); contains Interpro domain(s) IPR013583 Phosphoribosyltransferase C-terminal, plant
11_131_361(+)	Solyc08g044400.1.1	584	-53.01	Polyphosphoinositide phosphatase (AHRD V1 *--* B6K225_SCHJY); contains Interpro domain(s) IPR001202 WW/Rsp5/WWP
11_131_361(+)	Solyc06g050170.2.1	740	-70.66	Potassium transporter (AHRD V1 **** Q1T761_PHRAU); contains Interpro domain(s) IPR018519 Potassium uptake protein, kup IPR003855 K+ potassium transporter
11_131_361(+)	Solyc03g097280.2.1	594	-66.21	Pre-mRNA-splicing factor CWC22 homolog (AHRD V1 *--- CWC22_CAEEL); contains Interpro domain(s) IPR016024 Armadillo-type fold
11_131_361(+)	Solyc01g108600.2.1	573	-62.6	Presequence protease, mitochondrial (AHRD V1 **-- PREP_DANRE); contains Interpro domain(s) IPR013578 Peptidase M16C associated
11_131_361(+)	Solyc01g079490.2.1	749	-71.5	Protein fat-free homolog (AHRD V1 ***- FFR_DICDI); contains Interpro domain(s) IPR014812 Vps51/Vps67
11_131_361(+)	Solyc06g009650.2.1	586	-69.73	Protein fat-free homolog (AHRD V1 ***- FFR_DICDI); contains Interpro domain(s) IPR014812 Vps51/Vps67
11_131_361(+)	Solyc01g109080.2.1	932	-99	Protein kinase (AHRD V1 *-*- D3AX52_POLPA); contains Interpro domain(s) IPR000403 Phosphatidylinositol 3- and 4-kinase, catalytic
11_131_361(+)	Solyc01g056520.2.1	591	-65.14	RAN binding protein 16-like (AHRD V1 **-* Q9LHS4_ARATH); contains Interpro domain(s) IPR001494 Importin-beta, N-terminal
11_131_361(+)	Solyc08g067210.2.1	637	-70.47	Ribonuclease 3-like protein 2 (AHRD V1 *-*- RTL2_ORYSJ); contains Interpro domain(s) IPR000999 Ribonuclease III
11_131_361(+)	Solyc01g081040.2.1	575	-62.39	RING finger protein (AHRD V1 *-*- C6EUD3_SOYBN); contains Interpro domain(s) IPR018957 Zinc finger, C3HC4 RING-type
11_131_361(+)	Solyc09g055260.2.1	591	-59.26	RING zinc finger-containing protein (AHRD V1 *--- D3BGF4_POLPA); contains Interpro domain(s) IPR016024 Armadillo-type fold
11_131_361(+)	Solyc05g005630.2.1	605	-69.06	Sentrin/SUMO-specific protease 15 (AHRD V1 *-** Q6IE03_MOUSE); contains Interpro domain(s) IPR003653 Peptidase C48, SUMO/Sentrin/Ubl1
11_131_361(+)	Solyc01g059990.2.1	723	-84.02	Serine/threonine-protein phosphatase 7 long form homolog (AHRD V1 *--- PPP7L_ARATH); contains Interpro domain(s) IPR019557 Aminotransferase-like, plant mobile domain
11_131_361(+)	Solyc08g081180.2.1	736	-62.48	Signal peptide peptidase (AHRD V1 **** Q9MA44_ARATH); contains Interpro domain(s) IPR007369 Peptidase A22B, signal peptide peptidase
11_131_361(+)	Solyc04g049580.2.1	574	-51.99	Similarity the ORF shows strong similarity to EST 5419 - Aspergillus oryzae (AHRD V1 ***- A2Q8A7_ASPNC)
11_131_361(+)	Solyc03g059420.2.1	585	-54.01	Sister chromatid cohesion 2 (AHRD V1 **-- D7M7D7_ARALY); contains Interpro domain(s) IPR016024 Armadillo-type fold
11_131_361(+)	Solyc11g012770.1.1	633	-64.13	Sister chromatid cohesion protein PDS5 homolog B (AHRD V1 **-- PDS5B_HUMAN); contains Interpro domain(s) IPR016024 Armadillo-type fold
11_131_361(+)	Solyc09g092240.2.1	1017	-101.42	Small subunit processome component 20 homolog (AHRD V1 **-- UTP20_MOUSE); contains Interpro domain(s) IPR011430 Down-regulated in metastasis
11_131_361(+)	Solyc05g012650.2.1	573	-51.67	T7.1 protein (AHRD V1 *-*- Q9FZE6_ARATH); contains Interpro domain(s) IPR008581 Protein of unknown function DUF863, plant
11_131_361(+)	Solyc06g064910.2.1	774	-77.9	T-complex protein 11 (AHRD V1 ***- D7KML1_ARALY); contains Interpro domain(s) IPR008862 T-complex 11
11_131_361(+)	Solyc03g062650.2.1	729	-79.85	Thyroid adenoma-associated protein homolog (AHRD V1 *--- THADA_CANFA); contains Interpro domain(s) IPR019442 Protein of unknown function DUF2428, death-receptor-like
11_131_361(+)	Solyc11g008150.1.1	749	-86.6	Transcription elongation factor spt5 (AHRD V1 *-*- B6JZQ2_SCHJY); contains Interpro domain(s) IPR005100 Supt5 repeat
11_131_361(+)	Solyc09g009800.2.1	584	-51.18	Transcription factor (Fragment) (AHRD V1 *-*- B5BRE0_ARATH); contains Interpro domain(s) IPR007309 B-block binding subunit of TFIIIC
11_131_361(+)	Solyc07g006820.2.1	598	-67.21	Transcription initiation factor TFIID subunit 1 (AHRD V1 *--* B0W9Q3_CULQU); contains Interpro domain(s) IPR001487 Bromodomain
11_131_361(+)	Solyc08g006650.2.1	585	-61.67	Transmembrane protein 85 (AHRD V1 **-- B2W047_PYRTR); contains Interpro domain(s) IPR009445 Protein of unknown function DUF1077
11_131_361(+)	Solyc06g071120.2.1	601	-59.03	Ubiquitin carboxyl-terminal hydrolase family protein expressed (AHRD V1 *-*- Q10RB2_ORYSJ); contains Interpro domain(s) IPR006865 Protein of unknown function DUF629
11_131_361(+)	Solyc07g065630.2.1	866	-86.38	Ubiquitin-protein ligase 1 (AHRD V1 **** D7KN29_ARALY); contains Interpro domain(s) IPR000569 HECT
11_131_361(+)	Solyc08g074560.2.1	595	-52.87	Uncharacterized aarF domain-containing protein kinase 1 (AHRD V1 *--- ADCK1_CHICK); contains Interpro domain(s) IPR004147 ABC-1
11_131_361(+)	Solyc01g110700.2.1	7487	-723.76	Unknown Protein (AHRD V1)
11_131_361(+)	Solyc01g111180.2.1	7324	-709.75	Unknown Protein (AHRD V1)
11_131_361(+)	Solyc01g060150.2.1	746	-72.22	Unknown Protein (AHRD V1)
11_131_361(+)	Solyc04g051550.1.1	604	-66.57	Unknown Protein (AHRD V1)
11_131_361(+)	Solyc01g090440.2.1	570	-61.66	Unknown Protein (AHRD V1)
11_131_361(+)	Solyc09g009370.2.1	896	-95.28	Vacuolar protein sorting-associated protein (AHRD V1 *-*- Q2UJU9_ASPOR); contains Interpro domain(s) IPR009291 Protein of unknown function DUF946, plant
11_131_361(+)	Solyc11g045160.1.1	593	-51.72	Vacuolar sorting-associated protein (AHRD V1 *-*- C0NJR3_AJECG)
11_131_361(+)	Solyc01g100050.2.1	600	-63.96	WD-40 repeat protein (AHRD V1 *--- Q8Z020_ANASP); contains Interpro domain(s) IPR017986 WD40 repeat, region
11_131_361(+)	Solyc08g029050.2.1	582	-62.25	WD-repeat protein (AHRD V1 *--- A9FTS8_SORC5); contains Interpro domain(s) IPR017986 WD40 repeat, region
11_131_361(+)	Solyc09g014780.2.1	602	-54.46	WD-repeat protein mip1 (AHRD V1 *--- C5FLG0_NANOT); contains Interpro domain(s) IPR004083 Regulatory associated protein of TOR
11_131_361(+)	Solyc11g065920.1.1	725	-70.07	Xanthine dehydrogenase/oxidase (AHRD V1 ***- A9YL93_RABIT); contains Interpro domain(s) IPR016208 Aldehyde oxidase/xanthine dehydrogenase
11_131_361(+)	Solyc01g007640.2.1	872	-79.42	Ycf2 (AHRD V1 ***- D2KLP5_OLEEU); contains Interpro domain(s) IPR008543 Chloroplast Ycf2
11_131_361(+)	Solyc01g088100.2.1	596	-56.29	Zinc finger CCCH domain-containing protein 22 (AHRD V1 ***- C3H22_ORYSJ); contains Interpro domain(s) IPR000571 Zinc finger, CCCH-type
11_142_4505(+)	Solyc02g081870.2.1	593	-66.26	ABC transporter G family member 31 (AHRD V1 ***- AB31G_ARATH); contains Interpro domain(s) IPR013525 ABC-2 type transporter
11_142_4505(+)	Solyc06g059910.2.1	1465	-138.94	Alpha-humulene/(-)-(E)-beta-caryophyllene synthase (AHRD V1 **** HUMS_ARATH); contains Interpro domain(s) IPR005630 Terpene synthase, metal-binding domain
11_142_4505(+)	Solyc01g059980.2.1	2039	-200.77	Beta-glucanase (AHRD V1 ***- Q53X08_NICPL); contains Interpro domain(s) IPR000490 Glycoside hydrolase, family 17
11_142_4505(+)	Solyc01g098430.2.1	577	-56.84	Breast carcinoma amplified sequence 3 (Fragment) (AHRD V1 *--- B1AR77_MOUSE); contains Interpro domain(s) IPR011046 WD40 repeat-like
11_142_4505(+)	Solyc07g054370.2.1	602	-61.58	F-box/LRR-repeat protein At3g59200 (AHRD V1 ***- FBL64_ARATH); contains Interpro domain(s) IPR013596 FBD
11_142_4505(+)	Solyc02g082280.2.1	579	-63	Genomic DNA chromosome 5 TAC clone K2A18 (AHRD V1 **-- Q9FKY7_ARATH); contains Interpro domain(s) IPR012880 Protein of unknown function DUF1683, C-terminal
11_142_4505(+)	Solyc01g111080.2.1	1310	-141.51	Gibberellin-regulated protein 2 (AHRD V1 *--- B6UGG6_MAIZE); contains Interpro domain(s) IPR003854 Gibberellin regulated protein
11_142_4505(+)	Solyc05g015920.2.1	585	-60.41	GYF domain-containing protein (AHRD V1 ***- D7KBQ1_ARALY); contains Interpro domain(s) IPR003169 GYF
11_142_4505(+)	Solyc01g099190.2.1	898	-81.37	Lipoxygenase (AHRD V1 **** Q42873_SOLLC); contains Interpro domain(s) IPR001246 Lipoxygenase, plant
11_142_4505(+)	Solyc04g007710.2.1	585	-74.19	Mitogen-activated protein kinase (AHRD V1 ***- Q1W2K7_WHEAT); contains Interpro domain(s) IPR002290 Serine/threonine protein kinase
11_142_4505(+)	Solyc05g018320.2.1	571	-59.45	Ninja-family protein Os05g0558800 (AHRD V1 ***- NNJA4_ORYSJ); contains Interpro domain(s) IPR012463 Protein of unknown function DUF1675
11_142_4505(+)	Solyc09g018160.2.1	575	-61.72	Os12g0114200 protein (Fragment) (AHRD V1 *--- Q0IQL4_ORYSJ)
11_142_4505(+)	Solyc02g080210.2.1	748	-78.96	Pectinesterase (AHRD V1 ***- B9RXQ4_RICCO); contains Interpro domain(s) IPR000070 Pectinesterase, catalytic
11_142_4505(+)	Solyc01g007950.2.1	589	-58.96	Peroxidase 1 (AHRD V1 *-*- B6T173_MAIZE); contains Interpro domain(s) IPR000823 Plant peroxidase
11_142_4505(+)	Solyc03g094080.2.1	573	-58.48	Polyadenylate-binding protein family protein (AHRD V1 **** D7MT99_ARALY); contains Interpro domain(s) IPR000504 RNA recognition motif, RNP-1
11_142_4505(+)	Solyc07g006030.2.1	589	-57.33	Protein TIF31 homolog (AHRD V1 *--- TIF31_COCIM); contains Interpro domain(s) IPR011990 Tetratricopeptide-like helical
11_142_4505(+)	Solyc01g111440.2.1	748	-82.35	Senescence-associated protein 12 (AHRD V1 *-*- O81657_HEMSP); contains Interpro domain(s) IPR009686 Senescence-associated
11_142_4505(+)	Solyc01g059990.2.1	865	-85.86	Serine/threonine-protein phosphatase 7 long form homolog (AHRD V1 *--- PPP7L_ARATH); contains Interpro domain(s) IPR019557 Aminotransferase-like, plant mobile domain
11_142_4505(+)	Solyc03g005550.2.1	733	-57.23	Serine/threonine-protein phosphatase 7 long form homolog (AHRD V1 **-- PPP7L_ARATH); contains Interpro domain(s) IPR019557 Aminotransferase-like, plant mobile domain
11_142_4505(+)	Solyc07g062700.2.1	619	-60.97	Sodium/calcium exchanger family protein (AHRD V1 ***- D7KKF3_ARALY); contains Interpro domain(s) IPR004837 Sodium/calcium exchanger membrane region
11_142_4505(+)	Solyc10g084760.1.1	579	-71.63	Ubiquitin ligase E3 (Fragment) (AHRD V1 *-*- Q16LM2_AEDAE); contains Interpro domain(s) IPR013993 Zinc finger, N-recognin, metazoa
11_142_4505(+)	Solyc01g110700.2.1	8953	-819.57	Unknown Protein (AHRD V1)
11_142_4505(+)	Solyc01g111180.2.1	7190	-664.11	Unknown Protein (AHRD V1)
11_142_4505(+)	Solyc12g036080.1.1	897	-79.81	Unknown Protein (AHRD V1)
11_142_4505(+)	Solyc01g060150.2.1	748	-70.47	Unknown Protein (AHRD V1)
11_142_4505(+)	Solyc07g055910.2.1	584	-60.11	Unknown Protein (AHRD V1)
11_142_4505(+)	Solyc01g096110.2.1	741	-68.49	WD repeat protein (AHRD V1 *--- A1CP90_ASPCL); contains Interpro domain(s) IPR017986 WD40 repeat, region
11_142_4505(+)	Solyc05g054420.2.1	576	-53.56	X1 (Fragment) (AHRD V1 *-*- Q3T7E6_ZEAMM); contains Interpro domain(s) IPR005380 Region of unknown function XS
11_142_4566(-)	Solyc06g059910.2.1	909	-73.31	Alpha-humulene/(-)-(E)-beta-caryophyllene synthase (AHRD V1 **** HUMS_ARATH); contains Interpro domain(s) IPR005630 Terpene synthase, metal-binding domain
11_142_4566(-)	Solyc01g059980.2.1	1027	-60.9	Beta-glucanase (AHRD V1 ***- Q53X08_NICPL); contains Interpro domain(s) IPR000490 Glycoside hydrolase, family 17
11_142_4566(-)	Solyc07g006300.2.1	744	-58.78	CER1 protein (Fragment) (AHRD V1 *--- Q0WLZ2_ARATH); contains Interpro domain(s) IPR006694 Fatty acid hydroxylase
11_142_4566(-)	Solyc01g111080.2.1	1029	-83.63	Gibberellin-regulated protein 2 (AHRD V1 *--- B6UGG6_MAIZE); contains Interpro domain(s) IPR003854 Gibberellin regulated protein
11_142_4566(-)	Solyc01g059990.2.1	876	-53.06	Serine/threonine-protein phosphatase 7 long form homolog (AHRD V1 *--- PPP7L_ARATH); contains Interpro domain(s) IPR019557 Aminotransferase-like, plant mobile domain
11_142_4566(-)	Solyc01g106940.2.1	1324	-90.48	Single myb histone 4 (Fragment) (AHRD V1 *--- A6MZD9_ORYSI); contains Interpro domain(s) IPR005818 Histone H1/H5
11_142_4566(-)	Solyc01g110700.2.1	9566	-695.28	Unknown Protein (AHRD V1)
11_142_4566(-)	Solyc01g111180.2.1	9258	-678.91	Unknown Protein (AHRD V1)
11_142_4566(-)	Solyc07g052710.1.1	846	-54.87	Unknown Protein (AHRD V1)
11_1518_166(+)	Solyc04g082750.2.1	727	-77.58	3-beta hydroxysteroid dehydrogenase/isomerase family protein (AHRD V1 **** D7LGC3_ARALY); contains Interpro domain(s) IPR002225 3-beta hydroxysteroid dehydrogenase/isomerase
11_1518_166(+)	Solyc03g005730.2.1	579	-66.24	3-isopropylmalate dehydratase large subunit 2 (AHRD V1 ***- B6U6T6_MAIZE); contains Interpro domain(s) IPR011826 Homoaconitase/3-isopropylmalate dehydratase, large subunit, prokaryotic
11_1518_166(+)	Solyc10g078320.1.1	732	-65.93	AAA family ATPase CDC48 subfamily (AHRD V1 *--- D7D9J0_STAHD); contains Interpro domain(s) IPR003959 ATPase, AAA-type, core
11_1518_166(+)	Solyc01g068200.2.1	877	-93.66	Abscisic acid insensitive 8 homologue (Fragment) (AHRD V1 *--- A5A6Q3_TRIMO)
11_1518_166(+)	Solyc09g042750.2.1	584	-65.31	Acyl-CoA thioesterase 9 (AHRD V1 **** Q503Q9_DANRE)
11_1518_166(+)	Solyc09g074110.2.1	712	-78.66	AGAP009276-PA (Fragment) (AHRD V1 *--- Q7PVH5_ANOGA)
11_1518_166(+)	Solyc06g063090.2.1	612	-68.92	Alanine aminotransferase (AHRD V1 **** Q6VEJ5_CAPAN); contains Interpro domain(s) IPR004839 Aminotransferase, class I and II
11_1518_166(+)	Solyc05g005750.2.1	575	-54.24	Alpha alpha-trehalose-phosphate synthase (UDP-forming) (AHRD V1 **** A3CXN9_METMJ); contains Interpro domain(s) IPR001830 Glycosyl transferase, family 20
11_1518_166(+)	Solyc06g059910.2.1	577	-62.13	Alpha-humulene/(-)-(E)-beta-caryophyllene synthase (AHRD V1 **** HUMS_ARATH); contains Interpro domain(s) IPR005630 Terpene synthase, metal-binding domain
11_1518_166(+)	Solyc08g067190.2.1	724	-78.49	Anaphase promoting complex subunit 5 (AHRD V1 ***- Q5SCA2_OSTTA)
11_1518_166(+)	Solyc05g014510.2.1	567	-53.21	Ankyrin repeat domain-containing protein 44 (AHRD V1 *--- A8N4H2_COPC7); contains Interpro domain(s) IPR002110 Ankyrin
11_1518_166(+)	Solyc04g077490.2.1	599	-63.5	AP2-like ethylene-responsive transcription factor At1g16060 (AHRD V1 *-*- AP2L1_ARATH); contains Interpro domain(s) IPR001471 Pathogenesis-related transcriptional factor and ERF, DNA-binding
11_1518_166(+)	Solyc01g111010.2.1	609	-60.54	Aquaporin (AHRD V1 *-*- Q40266_MESCR); contains Interpro domain(s) IPR003676 Auxin responsive SAUR protein
11_1518_166(+)	Solyc08g013730.2.1	720	-75.52	Aquaporin (AHRD V1 ***- B3GK86_ARATH); contains Interpro domain(s) IPR000425 Major intrinsic protein
11_1518_166(+)	Solyc01g091460.2.1	595	-68.91	ARF guanine-nucleotide exchange factor 2 (AHRD V1 *--* GEA2_YEAST); contains Interpro domain(s) IPR000904 SEC7-like
11_1518_166(+)	Solyc06g068550.2.1	582	-55.08	Aspartic proteinase nepenthesin-1 (AHRD V1 **-- C0JAB4_ORYCO); contains Interpro domain(s) IPR001461 Peptidase A1
11_1518_166(+)	Solyc01g106740.2.1	592	-76.59	Aspartyl-tRNA synthetase (AHRD V1 **** D8FUD3_9CYAN); contains Interpro domain(s) IPR004524 Aspartyl-tRNA synthetase, class IIb, bacterial/mitochondrial type
11_1518_166(+)	Solyc03g020020.2.1	585	-54.54	AT3G05680-like protein (Fragment) (AHRD V1 *-*- D6PPW0_9BRAS)
11_1518_166(+)	Solyc02g087720.1.1	614	-74.85	At3g28720-like protein (Fragment) (AHRD V1 *-*- C4PEW7_9SOLN)
11_1518_166(+)	Solyc01g091470.2.1	746	-90.93	AT-hook DNA-binding protein (Fragment) (AHRD V1 *--* A1DR81_CATRO); contains Interpro domain(s) IPR014476 Predicted AT-hook DNA-binding
11_1518_166(+)	Solyc03g097670.2.1	572	-66.11	ATP binding protein (AHRD V1 **-- D7LS09_ARALY); contains Interpro domain(s) IPR003594 ATP-binding region, ATPase-like
11_1518_166(+)	Solyc02g091130.2.1	739	-75.51	ATP synthase subunit beta (AHRD V1 ***- Q9ZR78_NICSY); contains Interpro domain(s) IPR005722 ATPase, F1 complex, beta subunit
11_1518_166(+)	Solyc03g113060.2.1	740	-85.22	ATP-binding cassette transporter (AHRD V1 ***- D8RFW2_SELML); contains Interpro domain(s) IPR003439 ABC transporter-like
11_1518_166(+)	Solyc06g051460.2.1	581	-65.6	ATP-dependent chaperone ClpB (AHRD V1 *--- C0GC24_9FIRM)
11_1518_166(+)	Solyc01g106230.2.1	901	-94.65	B3 domain-containing protein At5g60142 (AHRD V1 *-*- Y5142_ARATH); contains Interpro domain(s) IPR003340 Transcriptional factor B3
11_1518_166(+)	Solyc12g099010.1.1	572	-60.71	Beige/BEACH domain containing protein (AHRD V1 *--- A2EN39_TRIVA); contains Interpro domain(s) IPR000409 Beige/BEACH
11_1518_166(+)	Solyc09g065700.2.1	722	-68.85	Beige/BEACH domain containing protein (AHRD V1 *--- A8PYX1_BRUMA); contains Interpro domain(s) IPR000409 Beige/BEACH
11_1518_166(+)	Solyc01g067660.2.1	727	-75.8	Beta-amylase (AHRD V1 **** Q5F304_SOYBN); contains Interpro domain(s) IPR013781 Glycoside hydrolase, subgroup, catalytic core
11_1518_166(+)	Solyc01g059980.2.1	1440	-150.2	Beta-glucanase (AHRD V1 ***- Q53X08_NICPL); contains Interpro domain(s) IPR000490 Glycoside hydrolase, family 17
11_1518_166(+)	Solyc01g080250.2.1	574	-62.23	BTB/POZ domain containing protein expressed (AHRD V1 ***- Q10C73_ORYSJ); contains Interpro domain(s) IPR013089 Kelch related
11_1518_166(+)	Solyc04g079300.2.1	581	-68.88	Calcineurin-like phosphoesterase family protein (AHRD V1 *-*- A9G786_SORC5); contains Interpro domain(s) IPR004843 Metallophosphoesterase
11_1518_166(+)	Solyc01g108440.2.1	589	-69.69	Calmodulin-binding protein (AHRD V1 **-* D7L4F9_ARALY); contains Interpro domain(s) IPR012442 Protein of unknown function DUF1645
11_1518_166(+)	Solyc12g100360.1.1	725	-78.13	Calpain-like protein (AHRD V1 ***- Q8RVL2_ARATH); contains Interpro domain(s) IPR001300 Peptidase C2, calpain
11_1518_166(+)	Solyc04g050490.2.1	595	-68.01	Carboxyl-terminal proteinase (AHRD V1 ***- B6SL47_MAIZE); contains Interpro domain(s) IPR004314 Protein of unknown function DUF239, plant
11_1518_166(+)	Solyc03g121560.2.1	582	-63.62	CA-responsive protein (AHRD V1 *-*- A6M8U7_BRAOL)
11_1518_166(+)	Solyc04g056630.2.1	586	-67.95	CBS domain containing protein-like (AHRD V1 ***- Q5JJJ9_ORYSJ); contains Interpro domain(s) IPR000644 Cystathionine beta-synthase, core
11_1518_166(+)	Solyc01g095020.2.1	586	-63.81	cDNA clone J023132J12 full insert sequence (AHRD V1 ***- B7EL27_ORYSJ)
11_1518_166(+)	Solyc01g111370.2.1	581	-63.29	Choline transporter like family (AHRD V1 *-*- C1FD31_9CHLO); contains Interpro domain(s) IPR007603 Protein of unknown function DUF580
11_1518_166(+)	Solyc01g068280.2.1	730	-79.39	Chromodomain-helicase-DNA-binding protein 1-like (AHRD V1 *--- CHD1L_DANRE); contains Interpro domain(s) IPR000330 SNF2-related
11_1518_166(+)	Solyc01g009630.2.1	575	-58.86	Cleavage and polyadenylation specificity factor subunit 5 (AHRD V1 ***- C1BVK1_9MAXI); contains Interpro domain(s) IPR016706 Cleavage and polyadenylation specificity factor, 25 kDa subunit
11_1518_166(+)	Solyc03g005100.2.1	572	-57.19	CXE carboxylesterase (AHRD V1 **-- Q0ZPU8_ACTDE); contains Interpro domain(s) IPR013094 Alpha/beta hydrolase fold-3
11_1518_166(+)	Solyc03g045140.2.1	576	-55.69	Cyclopropane-fatty-acyl-phospholipid synthase (AHRD V1 *-*- C7LRK7_DESBD); contains Interpro domain(s) IPR003333 Cyclopropane-fatty-acyl-phospholipid synthase
11_1518_166(+)	Solyc01g091040.2.1	735	-73.94	Cysteine-rich repeat secretory protein 15 (AHRD V1 ***- CRR15_ARATH); contains Interpro domain(s) IPR002902 Protein of unknown function DUF26
11_1518_166(+)	Solyc11g039360.1.1	586	-64.64	Cytochrome c biogenesis FC (AHRD V1 ***- D5I3F3_CUCPE)
11_1518_166(+)	Solyc08g079310.2.1	602	-63.83	Cytochrome P450
11_1518_166(+)	Solyc05g053300.2.1	728	-75.9	Dihydrolipoyl dehydrogenase (AHRD V1 ***- Q8GT30_SOLLC); contains Interpro domain(s) IPR012999 Pyridine nucleotide-disulphide oxidoreductase, class I, active site IPR006258 Dihydrolipoamide dehydrogenase
11_1518_166(+)	Solyc11g066370.1.1	729	-81.14	DNA ligase (AHRD V1 ***- B9HQN9_POPTR); contains Interpro domain(s) IPR000977 ATP-dependent DNA ligase
11_1518_166(+)	Solyc01g079520.2.1	601	-68.11	DNA mismatch repair protein muts (AHRD V1 ***- Q16P35_AEDAE); contains Interpro domain(s) IPR017261 DNA mismatch repair protein Msh6
11_1518_166(+)	Solyc01g103760.2.1	727	-79.09	DUF803 domain membrane protein (AHRD V1 **-- C1GHB7_PARBD); contains Interpro domain(s) IPR008521 Protein of unknown function DUF803
11_1518_166(+)	Solyc03g113540.2.1	571	-64.06	Dynein light chain cytoplasmic (AHRD V1 *-*- A7ELJ7_SCLS1); contains Interpro domain(s) IPR001372 Dynein light chain, type 1 and 2
11_1518_166(+)	Solyc02g089260.2.1	579	-66.42	E3 ubiquitin-protein ligase UBR4 (AHRD V1 *--- UBR4_HUMAN); contains Interpro domain(s) IPR013993 Zinc finger, N-recognin, metazoa
11_1518_166(+)	Solyc01g068500.2.1	588	-62.4	Early-responsive to dehydration protein-like (AHRD V1 **-- Q5JKX1_ORYSJ); contains Interpro domain(s) IPR003864 Protein of unknown function DUF221
11_1518_166(+)	Solyc05g052490.2.1	609	-60.78	Ectonucleoside triphosphate diphosphohydrolase 1 (AHRD V1 *--- Q6DC46_DANRE); contains Interpro domain(s) IPR000407 Nucleoside phosphatase GDA1/CD39
11_1518_166(+)	Solyc08g062920.2.1	584	-73.57	Elongation factor EF-2 (AHRD V1 **** Q9SGT4_ARATH); contains Interpro domain(s) IPR000795 Protein synthesis factor, GTP-binding
11_1518_166(+)	Solyc01g044480.2.1	582	-72.3	Elongation factor P (AHRD V1 ***- B6TAH3_MAIZE); contains Interpro domain(s) IPR008991 Translation protein SH3-like
11_1518_166(+)	Solyc03g114450.2.1	572	-63.53	Extracellular calcium sensing receptor (AHRD V1 ***- C7BCU7_LIQFO); contains Interpro domain(s) IPR001763 Rhodanese-like
11_1518_166(+)	Solyc05g013220.2.1	608	-68.76	Fatty acid elongase 3-ketoacyl-CoA synthase (AHRD V1 **** Q6DUV6_BRANA); contains Interpro domain(s) IPR012392 Very-long-chain 3-ketoacyl-CoA synthase
11_1518_166(+)	Solyc02g022910.2.1	600	-69.22	Fatty acid hydroxylase family protein expressed (AHRD V1 **** Q9AY73_ORYSJ); contains Interpro domain(s) IPR006694 Fatty acid hydroxylase
11_1518_166(+)	Solyc09g090760.2.1	595	-62.43	Folate/biopterin transporter family protein (AHRD V1 *-*- B6TYM7_MAIZE); contains Interpro domain(s) IPR004324 Biopterin transport-related protein BT1
11_1518_166(+)	Solyc01g099650.2.1	597	-60.41	Formin 3 (AHRD V1 *-*- D0QAN4_ARATH); contains Interpro domain(s) IPR015425 Actin-binding FH2
11_1518_166(+)	Solyc09g042740.2.1	582	-62.39	Formin 3 (AHRD V1 *-*- D0QAN4_ARATH); contains Interpro domain(s) IPR015425 Actin-binding FH2
11_1518_166(+)	Solyc02g086500.2.1	607	-65.96	Genomic DNA chromosome 3 P1 clone MGF10 (AHRD V1 **-- Q9LVX3_ARATH); contains Interpro domain(s) IPR016024 Armadillo-type fold
11_1518_166(+)	Solyc05g016240.2.1	606	-71.59	Genomic DNA chromosome 3 P1 clone MMP21 (AHRD V1 **-- Q9LHJ0_ARATH)
11_1518_166(+)	Solyc03g121380.2.1	581	-58.44	Genomic DNA chromosome 3 P1 clone MXL8 (AHRD V1 *-*- Q9LU30_ARATH); contains Interpro domain(s) IPR010844 Occludin and RNA polymerase II elongation factor ELL domain
11_1518_166(+)	Solyc04g051310.2.1	571	-58.55	Genomic DNA chromosome 5 P1 clone MQK4 (AHRD V1 ***- Q9FFD1_ARATH)
11_1518_166(+)	Solyc06g069500.2.1	579	-66.32	Genomic DNA chromosome 5 P1 clone MXM12 (AHRD V1 *-*- Q9SD86_ARATH)
11_1518_166(+)	Solyc02g088580.1.1	579	-53.31	Genomic DNA chromosome 5 P1 clone MXM12 (AHRD V1 *-*- Q9SDA2_ARATH); contains Interpro domain(s) IPR012417 Calmodulin-binding, plant
11_1518_166(+)	Solyc01g066570.2.1	600	-67.33	Genomic DNA chromosome 5 TAC clone K14A3 (AHRD V1 *--- Q9FGQ9_ARATH); contains Interpro domain(s) IPR007650 Protein of unknown function DUF581
11_1518_166(+)	Solyc01g111080.2.1	1324	-141.79	Gibberellin-regulated protein 2 (AHRD V1 *--- B6UGG6_MAIZE); contains Interpro domain(s) IPR003854 Gibberellin regulated protein
11_1518_166(+)	Solyc11g072230.1.1	616	-73.01	Glucan endo-1 3-beta-glucosidase 3 (AHRD V1 ***- B6TLN1_MAIZE); contains Interpro domain(s) IPR013781 Glycoside hydrolase, subgroup, catalytic core
11_1518_166(+)	Solyc11g068440.1.1	588	-67.74	Glucan endo-1 3-beta-glucosidase 7 (AHRD V1 ***- B6T478_MAIZE); contains Interpro domain(s) IPR000490 Glycoside hydrolase, family 17
11_1518_166(+)	Solyc01g073750.2.1	580	-67.07	Glucan synthase like 3 (AHRD V1 ***- D8R8I5_SELML); contains Interpro domain(s) IPR003440 Glycosyl transferase, family 48
11_1518_166(+)	Solyc06g075100.2.1	722	-74.68	Glycosyl transferase family 2 protein (AHRD V1 **-* B5RHS8_MUSBA)
11_1518_166(+)	Solyc03g116870.2.1	595	-72.18	Glycosyl transferase family 9 (AHRD V1 ***- A0YHY3_LYNSP)
11_1518_166(+)	Solyc02g093770.2.1	591	-63.46	GPI inositol-deacylase (AHRD V1 *-*- C5FP83_NANOT); contains Interpro domain(s) IPR012908 PGAP1-like
11_1518_166(+)	Solyc01g100200.2.1	577	-58.77	GRAS family transcription factor (AHRD V1 **-* B9GJL6_POPTR); contains Interpro domain(s) IPR005202 GRAS transcription factor
11_1518_166(+)	Solyc03g063270.2.1	742	-73.95	HAT dimerisation domain-containing protein-like (AHRD V1 ***- Q5VNQ7_ORYSJ); contains Interpro domain(s) IPR007021 Protein of unknown function DUF659
11_1518_166(+)	Solyc02g085810.2.1	575	-59.46	HEAT repeat containing 5B (AHRD V1 *--- B9EK47_HUMAN); contains Interpro domain(s) IPR011989 Armadillo-like helical
11_1518_166(+)	Solyc05g054740.2.1	594	-71.4	High affinity sulfate transporter 2 (AHRD V1 **** SUT2_STYHA); contains Interpro domain(s) IPR001902 Sulphate anion transporter
11_1518_166(+)	Solyc03g082940.2.1	593	-72.25	Importin subunit beta (AHRD V1 ***- B0WBR4_CULQU); contains Interpro domain(s) IPR011989 Armadillo-like helical
11_1518_166(+)	Solyc01g100110.2.1	596	-69.15	Integrin-linked kinase-associated serine/threonine phosphatase 2C (AHRD V1 **** ILKAP_BOVIN); contains Interpro domain(s) IPR015655 Protein phosphatase 2C
11_1518_166(+)	Solyc06g082240.2.1	592	-54.2	Laccase-13 (AHRD V1 ***- D7LZX9_ARALY); contains Interpro domain(s) IPR017761 Laccase
11_1518_166(+)	Solyc03g006050.2.1	588	-73.13	Leucine rich repeat family protein (AHRD V1 *--- Q1EP22_MUSBA)
11_1518_166(+)	Solyc04g079280.2.1	728	-84.52	LipA and NB-ARC domain protein (AHRD V1 *--- B8NDK8_ASPFN); contains Interpro domain(s) IPR016024 Armadillo-type fold
11_1518_166(+)	Solyc12g100020.1.1	725	-63.24	LRR receptor-like serine/threonine-protein kinase, RLP
11_1518_166(+)	Solyc09g065920.2.1	580	-65.38	Magnesium transporter MRS2-I (AHRD V1 **** MRS2I_ORYSJ); contains Interpro domain(s) IPR002523 Mg2+ transporter protein, CorA-like
11_1518_166(+)	Solyc09g007870.2.1	594	-56.13	Manganese transporter mntH (AHRD V1 *--- D1CW90_9RHIZ); contains Interpro domain(s) IPR017187 Ethylene-insensitive 2
11_1518_166(+)	Solyc04g072260.1.1	743	-82.45	Midasin (AHRD V1 ***- B9MXW7_POPTR); contains Interpro domain(s) IPR012099 Midasin
11_1518_166(+)	Solyc06g066550.2.1	580	-62.19	MRS7 family protein (AHRD V1 *--- B6QVZ9_PENMQ); contains Interpro domain(s) IPR011685 LETM1-like
11_1518_166(+)	Solyc12g044820.1.1	750	-84.22	Multidrug resistance protein ABC transporter family (AHRD V1 ***- B9GX56_POPTR); contains Interpro domain(s) IPR003439 ABC transporter-like
11_1518_166(+)	Solyc03g063730.2.1	770	-85.95	Multidrug resistance protein mdtK (AHRD V1 **-- MDTK_YERP3); contains Interpro domain(s) IPR002528 Multi antimicrobial extrusion protein MatE
11_1518_166(+)	Solyc07g041150.2.1	584	-62.17	Myosin XI (AHRD V1 ***- Q5R216_TOBAC); contains Interpro domain(s) IPR001609 Myosin head, motor region
11_1518_166(+)	Solyc10g005220.2.1	580	-51.94	Neuralized (AHRD V1 *--- B4M452_DROVI); contains Interpro domain(s) IPR001841 Zinc finger, RING-type
11_1518_166(+)	Solyc03g082680.2.1	575	-68.57	Neuroblastoma-amplified protein-like protein (AHRD V1 *-*- D2V0U7_NAEGR); contains Interpro domain(s) IPR011046 WD40 repeat-like
11_1518_166(+)	Solyc06g009530.2.1	610	-69.47	Nodal modulator 3 (AHRD V1 ***- B0XK54_CULQU); contains Interpro domain(s) IPR013784 Carbohydrate-binding-like fold
11_1518_166(+)	Solyc10g005590.2.1	594	-68.59	Nuclear cap-binding protein subunit 2 (AHRD V1 *--- NCBP2_CHICK); contains Interpro domain(s) IPR012677 Nucleotide-binding, alpha-beta plait
11_1518_166(+)	Solyc01g090670.2.1	723	-75.25	Nuclear pore glycoprotein p62 (AHRD V1 *--- C0HBQ2_SALSA); contains Interpro domain(s) IPR007758 Nucleoporin, Nsp1-like, C-terminal
11_1518_166(+)	Solyc02g070810.2.1	600	-70.41	Nuclear pore membrane glycoprotein 210 (AHRD V1 ***- PO210_HUMAN); contains Interpro domain(s) IPR008964 Invasin/intimin cell-adhesion
11_1518_166(+)	Solyc05g005380.1.1	1216	-144.16	Nuclear transcription factor Y subunit B-6 (AHRD V1 *-*- B6UH02_MAIZE); contains Interpro domain(s) IPR003957 Transcription factor, CBFA/NFYB, DNA topoisomerase
11_1518_166(+)	Solyc02g065500.2.1	733	-82.89	Nucleolar pre-ribosomal-associated protein 1 (AHRD V1 *--- NPA1P_HUMAN)
11_1518_166(+)	Solyc03g082620.2.1	594	-64.85	Oligopeptide transporter (Fragment) (AHRD V1 **** B0DAK3_LACBS); contains Interpro domain(s) IPR004813 Oligopeptide transporter OPT superfamily
11_1518_166(+)	Solyc01g105990.2.1	603	-68.36	Os01g0107900 protein (Fragment) (AHRD V1 *-*- Q0JRC9_ORYSJ)
11_1518_166(+)	Solyc03g114060.2.1	585	-58.87	Os02g0742100 protein (Fragment) (AHRD V1 *-*- Q0DXN7_ORYSJ); contains Interpro domain(s) IPR001025 Bromo adjacent region
11_1518_166(+)	Solyc01g107200.2.1	577	-62.42	Os02g0794300 protein (Fragment) (AHRD V1 *-*- Q0DWU9_ORYSJ); contains Interpro domain(s) IPR007573 Protein of unknown function DUF566
11_1518_166(+)	Solyc01g066640.2.1	730	-78.18	Os04g0405500 protein (Fragment) (AHRD V1 *-*- Q0JDG3_ORYSJ)
11_1518_166(+)	Solyc06g007170.2.1	563	-55.85	Os06g0207500 protein (Fragment) (AHRD V1 **-- Q0DDQ9_ORYSJ); contains Interpro domain(s) IPR004253 Protein of unknown function DUF231, plant
11_1518_166(+)	Solyc01g104270.2.1	606	-69.3	Os12g0283800 protein (Fragment) (AHRD V1 *-*- Q0INW6_ORYSJ)
11_1518_166(+)	Solyc04g055180.2.1	593	-62.27	Oxidation resistance 1-like protein (AHRD V1 *--- Q6Z157_ORYSJ); contains Interpro domain(s) IPR006571 TLDc
11_1518_166(+)	Solyc06g084380.2.1	901	-100.08	Oxidoreductase 2OG-Fe oxygenase family protein (AHRD V1 ***- B6ST02_MAIZE); contains Interpro domain(s) IPR005123 Oxoglutarate and iron-dependent oxygenase
11_1518_166(+)	Solyc01g111470.2.1	593	-68.63	Pentatricopeptide repeat-containing protein (AHRD V1 ***- D7L879_ARALY); contains Interpro domain(s) IPR002885 Pentatricopeptide repeat
11_1518_166(+)	Solyc02g082970.1.1	610	-72.37	Pentatricopeptide repeat-containing protein (AHRD V1 ***- D7L9H0_ARALY); contains Interpro domain(s) IPR002885 Pentatricopeptide repeat
11_1518_166(+)	Solyc06g065500.2.1	582	-70.92	Pentatricopeptide repeat-containing protein (AHRD V1 ***- D7LEW3_ARALY); contains Interpro domain(s) IPR002528 Multi antimicrobial extrusion protein MatE
11_1518_166(+)	Solyc02g067200.2.1	583	-72.46	Pentatricopeptide repeat-containing protein (AHRD V1 ***- D7M7B2_ARALY); contains Interpro domain(s) IPR002885 Pentatricopeptide repeat
11_1518_166(+)	Solyc01g007950.2.1	593	-65.52	Peroxidase 1 (AHRD V1 *-*- B6T173_MAIZE); contains Interpro domain(s) IPR000823 Plant peroxidase
11_1518_166(+)	Solyc07g055060.2.1	584	-62.84	Phosphoenolpyruvate carboxylase 1 (AHRD V1 ***- O23946_GOSHI); contains Interpro domain(s) IPR015813 Pyruvate/Phosphoenolpyruvate kinase, catalytic core IPR001449 Phosphoenolpyruvate carboxylase
11_1518_166(+)	Solyc05g006640.2.1	604	-62.38	Phospholipid-transporting ATPase (AHRD V1 **** C1GDL1_PARBD); contains Interpro domain(s) IPR006539 ATPase, P-type, phospholipid-translocating, flippase
11_1518_166(+)	Solyc12g098780.1.1	602	-76.22	Pistil extensin like protein (Fragment) (AHRD V1 *-*- Q40552_TOBAC); contains Interpro domain(s) IPR006041 Pollen Ole e 1 allergen and extensin
11_1518_166(+)	Solyc06g053320.2.1	719	-71.1	Polyadenylate-binding protein (AHRD V1 *--- Q08212_DROME); contains Interpro domain(s) IPR012921 Spen paralogue and orthologue C-terminal
11_1518_166(+)	Solyc07g042180.2.1	618	-75.83	Polyadenylate-binding protein (AHRD V1 **** A8N215_COPC7); contains Interpro domain(s) IPR000504 RNA recognition motif, RNP-1
11_1518_166(+)	Solyc09g074820.2.1	577	-69.14	Potassium transporter (AHRD V1 ***- Q1T6Z4_PHRAU); contains Interpro domain(s) IPR003855 K+ potassium transporter
11_1518_166(+)	Solyc02g076870.2.1	609	-78.02	Potential lipid particle serine esterase (AHRD V1 *--- Q59KL3_CANAL); contains Interpro domain(s) IPR007751 Protein of unknown function DUF676, hydrolase-like
11_1518_166(+)	Solyc03g111630.2.1	596	-66.62	Programmed cell death 4a (AHRD V1 *--- D3TLD2_GLOMM); contains Interpro domain(s) IPR003891 Initiation factor eIF-4 gamma, MA3
11_1518_166(+)	Solyc04g080170.2.1	606	-67.71	Protein serine/threonine kinase (AHRD V1 *-** D3BAM4_POLPA); contains Interpro domain(s) IPR002290 Serine/threonine protein kinase
11_1518_166(+)	Solyc02g090430.2.1	722	-78.67	Protein serine/threonine kinase (AHRD V1 *-** D3BP85_POLPA); contains Interpro domain(s) IPR002290 Serine/threonine protein kinase
11_1518_166(+)	Solyc04g071570.2.1	585	-57.88	Protein SET DOMAIN GROUP 41 (AHRD V1 ***- SDG41_ARATH); contains Interpro domain(s) IPR001214 SET
11_1518_166(+)	Solyc07g054820.2.1	600	-65.47	Protein thf1 (AHRD V1 ***- A0YRG1_LYNSP)
11_1518_166(+)	Solyc02g071060.2.1	580	-58.43	Purine permease family protein (AHRD V1 **-* D7MCV2_ARALY); contains Interpro domain(s) IPR004853 Protein of unknown function DUF250
11_1518_166(+)	Solyc07g008560.2.1	576	-56.51	Purple acid phosphatase (AHRD V1 **-* B0WRM8_CULQU); contains Interpro domain(s) IPR008963 Purple acid phosphatase-like, N-terminal
11_1518_166(+)	Solyc07g007600.2.1	585	-57.32	Pyrophosphate-energized proton pump (AHRD V1 ***- B0SRX3_LEPBP); contains Interpro domain(s) IPR004131 Inorganic H+ pyrophosphatase
11_1518_166(+)	Solyc03g111670.2.1	729	-78.07	Receptor like kinase, RLK
11_1518_166(+)	Solyc03g123780.2.1	609	-73.07	Receptor like kinase, RLK
11_1518_166(+)	Solyc12g056730.1.1	597	-60.6	Receptor like kinase, RLK
11_1518_166(+)	Solyc02g089550.2.1	594	-62.03	Receptor like kinase, RLK
11_1518_166(+)	Solyc02g071860.2.1	585	-56.57	Receptor like kinase, RLK
11_1518_166(+)	Solyc03g026040.2.1	583	-70.05	Receptor like kinase, RLK
11_1518_166(+)	Solyc06g068910.2.1	583	-72.65	Receptor like kinase, RLK
11_1518_166(+)	Solyc09g091260.2.1	573	-50.14	Receptor like kinase, RLK
11_1518_166(+)	Solyc09g015170.2.1	572	-55.97	Receptor like kinase, RLK
11_1518_166(+)	Solyc02g086270.2.1	1175	-121.84	Receptor-like kinase (AHRD V1 *-*- A7VM25_MARPO); contains Interpro domain(s) IPR002290 Serine/threonine protein kinase
11_1518_166(+)	Solyc05g008930.2.1	593	-63.49	Receptor-like kinase (AHRD V1 *-*- A7VM25_MARPO); contains Interpro domain(s) IPR002290 Serine/threonine protein kinase
11_1518_166(+)	Solyc02g068300.2.1	586	-63.04	Receptor-like kinase (AHRD V1 ***- A7VM32_MARPO); contains Interpro domain(s) IPR002290 Serine/threonine protein kinase
11_1518_166(+)	Solyc03g005130.1.1	1005	-106.01	Receptor-like protein kinase (AHRD V1 ***- B6ST43_MAIZE); contains Interpro domain(s) IPR002290 Serine/threonine protein kinase
11_1518_166(+)	Solyc01g101100.2.1	578	-52.41	Receptor-like protein kinase (AHRD V1 ***- Q9LYS5_ARATH); contains Interpro domain(s) IPR002290 Serine/threonine protein kinase
11_1518_166(+)	Solyc05g010140.2.1	733	-87.97	Receptor-like protein kinase At5g59670 (AHRD V1 *-*- RLK7_ARATH); contains Interpro domain(s) IPR002290 Serine/threonine protein kinase
11_1518_166(+)	Solyc03g034060.2.1	749	-82.92	Receptor-like protein kinase At5g59670 (AHRD V1 *-** RLK7_ARATH); contains Interpro domain(s) IPR002290 Serine/threonine protein kinase
11_1518_166(+)	Solyc09g007700.2.1	711	-74.53	RING finger protein B (AHRD V1 *-*- RNGB_DICDI); contains Interpro domain(s) IPR001841 Zinc finger, RING-type
11_1518_166(+)	Solyc04g082770.2.1	603	-63.36	RNA-binding protein 68390-68829 (AHRD V1 *--* Q9C805_ARATH); contains Interpro domain(s) IPR000504 RNA recognition motif, RNP-1
11_1518_166(+)	Solyc01g111440.2.1	723	-79.09	Senescence-associated protein 12 (AHRD V1 *-*- O81657_HEMSP); contains Interpro domain(s) IPR009686 Senescence-associated
11_1518_166(+)	Solyc03g117770.2.1	736	-81.98	Serine incorporator 1 (AHRD V1 **-* B5X3W1_SALSA); contains Interpro domain(s) IPR005016 TMS membrane protein/tumour differentially expressed protein
11_1518_166(+)	Solyc07g062940.2.1	578	-56.75	Serine/threonine kinase 25 (AHRD V1 *-*- Q6V9V7_CHICK); contains Interpro domain(s) IPR002290 Serine/threonine protein kinase
11_1518_166(+)	Solyc02g091470.2.1	607	-62.42	Serine/threonine protein kinase-like (AHRD V1 *-** Q9FGC3_ARATH); contains Interpro domain(s) IPR002290 Serine/threonine protein kinase
11_1518_166(+)	Solyc03g121410.2.1	581	-61.59	Serine/threonine protein phosphatase 2A 55 kDa regulatory subunit B beta isoform (AHRD V1 ***- 2ABB_ARATH); contains Interpro domain(s) IPR000009 Protein phosphatase 2A, regulatory subunit PR55
11_1518_166(+)	Solyc11g071970.1.1	595	-59.26	Serine/threonine-protein kinase Nek2 (AHRD V1 *-*- NEK2_ORYSJ); contains Interpro domain(s) IPR017442 Serine/threonine protein kinase-related
11_1518_166(+)	Solyc10g005630.2.1	586	-68.05	Serine/threonine-protein kinase receptor (AHRD V1 **** B6SYF0_MAIZE); contains Interpro domain(s) IPR002290 Serine/threonine protein kinase
11_1518_166(+)	Solyc01g059990.2.1	730	-78	Serine/threonine-protein phosphatase 7 long form homolog (AHRD V1 *--- PPP7L_ARATH); contains Interpro domain(s) IPR019557 Aminotransferase-like, plant mobile domain
11_1518_166(+)	Solyc04g049580.2.1	1028	-111.64	Similarity the ORF shows strong similarity to EST 5419 - Aspergillus oryzae (AHRD V1 ***- A2Q8A7_ASPNC)
11_1518_166(+)	Solyc01g106940.2.1	1165	-130.04	Single myb histone 4 (Fragment) (AHRD V1 *--- A6MZD9_ORYSI); contains Interpro domain(s) IPR005818 Histone H1/H5
11_1518_166(+)	Solyc04g079270.2.1	719	-84.26	Sorting and assembly machinery component 50 homolog (AHRD V1 **-- B5X2H0_SALSA); contains Interpro domain(s) IPR000184 Bacterial surface antigen (D15)
11_1518_166(+)	Solyc06g050550.2.1	592	-76.84	Sorting nexin 1 (AHRD V1 ***- Q70YZ8_BRAOL); contains Interpro domain(s) IPR001683 Phox-like
11_1518_166(+)	Solyc04g077440.2.1	585	-66.87	Squalene monooxygenase (AHRD V1 ***- Q506K3_DATIN); contains Interpro domain(s) IPR013698 Squalene epoxidase
11_1518_166(+)	Solyc11g062360.1.1	623	-72.04	Sugar transporter superfamily (AHRD V1 **-- A4Q7Q3_MEDTR)
11_1518_166(+)	Solyc03g062650.2.1	611	-63.77	Thyroid adenoma-associated protein homolog (AHRD V1 *--- THADA_CANFA); contains Interpro domain(s) IPR019442 Protein of unknown function DUF2428, death-receptor-like
11_1518_166(+)	Solyc06g051390.2.1	585	-61.31	Tomosyn-like protein (AHRD V1 **-- A9RPV0_PHYPA); contains Interpro domain(s) IPR011046 WD40 repeat-like
11_1518_166(+)	Solyc03g026260.2.1	738	-73.5	TraB family protein (AHRD V1 *-*- D7KED1_ARALY); contains Interpro domain(s) IPR002816 Pheromone shutdown-related, TraB
11_1518_166(+)	Solyc07g005400.2.1	607	-60.47	Transcription factor (AHRD V1 *-** D6MKM4_9ASPA); contains Interpro domain(s) IPR011598 Helix-loop-helix DNA-binding
11_1518_166(+)	Solyc02g078790.2.1	594	-59.44	Transcription factor jumonji domain-containing protein (AHRD V1 **-* D7KIX8_ARALY); contains Interpro domain(s) IPR013129 Transcription factor jumonji
11_1518_166(+)	Solyc01g088720.2.1	617	-87.17	Transcription initiation factor IIB (AHRD V1 *-** B6K3D6_SCHJY); contains Interpro domain(s) IPR000812 Transcription factor TFIIB related
11_1518_166(+)	Solyc11g005990.1.1	593	-66.91	Transcriptional corepressor SEUSS (AHRD V1 *--- SEUSS_ARATH)
11_1518_166(+)	Solyc01g110040.2.1	1328	-151.78	Transducin family protein (AHRD V1 ***- D7L1V6_ARALY)
11_1518_166(+)	Solyc08g076720.2.1	893	-101.15	Uncharacterized ABC transporter ATP-binding protein TM_0288 (AHRD V1 *--* Y288_THEMA); contains Interpro domain(s) IPR003439 ABC transporter-like
11_1518_166(+)	Solyc01g079780.2.1	608	-63.34	Uncharacterized GPI-anchored protein At5g19250 (AHRD V1 ***- UGPI3_ARATH)
11_1518_166(+)	Solyc01g110700.2.1	12601	-1377.99	Unknown Protein (AHRD V1)
11_1518_166(+)	Solyc01g111180.2.1	12038	-1311.6	Unknown Protein (AHRD V1)
11_1518_166(+)	Solyc07g041520.2.1	1170	-123.25	Unknown Protein (AHRD V1)
11_1518_166(+)	Solyc01g060150.2.1	1159	-116.39	Unknown Protein (AHRD V1)
11_1518_166(+)	Solyc02g062280.2.1	944	-113.15	Unknown Protein (AHRD V1)
11_1518_166(+)	Solyc08g079810.2.1	738	-82.92	Unknown Protein (AHRD V1)
11_1518_166(+)	Solyc02g064600.2.1	735	-71.49	Unknown Protein (AHRD V1)
11_1518_166(+)	Solyc04g049600.2.1	732	-78.87	Unknown Protein (AHRD V1)
11_1518_166(+)	Solyc06g053230.2.1	605	-71.33	Unknown Protein (AHRD V1)
11_1518_166(+)	Solyc11g056640.1.1	603	-77.78	Unknown Protein (AHRD V1)
11_1518_166(+)	Solyc03g117190.1.1	601	-70.68	Unknown Protein (AHRD V1)
11_1518_166(+)	Solyc01g095330.2.1	599	-58.53	Unknown Protein (AHRD V1)
11_1518_166(+)	Solyc01g100300.2.1	597	-66.71	Unknown Protein (AHRD V1)
11_1518_166(+)	Solyc05g016440.2.1	596	-60.39	Unknown Protein (AHRD V1)
11_1518_166(+)	Solyc11g007510.1.1	592	-65.69	Unknown Protein (AHRD V1)
11_1518_166(+)	Solyc02g085370.2.1	589	-68.44	Unknown Protein (AHRD V1)
11_1518_166(+)	Solyc04g049610.2.1	587	-61.93	Unknown Protein (AHRD V1)
11_1518_166(+)	Solyc05g023910.1.1	584	-72.04	Unknown Protein (AHRD V1)
11_1518_166(+)	Solyc09g015010.2.1	584	-61.33	Unknown Protein (AHRD V1)
11_1518_166(+)	Solyc04g049860.1.1	576	-56.8	Unknown Protein (AHRD V1)
11_1518_166(+)	Solyc05g013780.2.1	576	-70.47	Unknown Protein (AHRD V1)
11_1518_166(+)	Solyc10g005970.1.1	574	-66.38	Unknown Protein (AHRD V1)
11_1518_166(+)	Solyc09g098530.2.1	568	-67.85	Unknown Protein (AHRD V1)
11_1518_166(+)	Solyc02g062930.2.1	567	-54.61	Unknown Protein (AHRD V1)
11_1518_166(+)	Solyc01g104300.2.1	576	-57.4	Unknown Protein (AHRD V1); contains Interpro domain(s) IPR006927 Protein of unknown function DUF639
11_1518_166(+)	Solyc09g009370.2.1	741	-88.57	Vacuolar protein sorting-associated protein (AHRD V1 *-*- Q2UJU9_ASPOR); contains Interpro domain(s) IPR009291 Protein of unknown function DUF946, plant
11_1518_166(+)	Solyc05g044610.1.1	584	-54.21	Vacuolar protein sorting-associated protein 8 (AHRD V1 *--- D0NE39_PHYIN); contains Interpro domain(s) IPR016024 Armadillo-type fold
11_1518_166(+)	Solyc02g081970.2.1	877	-88.93	Vacuolar sorting receptor 7 (AHRD V1 **** B6UEQ5_MAIZE); contains Interpro domain(s) IPR003137 Protease-associated PA
11_1518_166(+)	Solyc05g053130.2.1	590	-67.13	WD-40 repeat protein (AHRD V1 *--- B7K7B4_CYAP7); contains Interpro domain(s) IPR017986 WD40 repeat, region
11_1518_166(+)	Solyc07g065260.2.1	600	-73.04	WRKY transcription factor 78 (AHRD V1 ***- Q5HZ67_ORYSA); contains Interpro domain(s) IPR003657 DNA-binding WRKY
11_1518_166(+)	Solyc02g088340.2.1	584	-63.67	WRKY transcription factor-c (AHRD V1 **** Q5DJV3_CAPAN); contains Interpro domain(s) IPR003657 DNA-binding WRKY
11_1518_166(+)	Solyc02g077390.1.1	598	-64.99	WUSCHEL-related homeobox 11 (AHRD V1 *-*- B6SN57_MAIZE); contains Interpro domain(s) IPR001356 Homeobox
11_1518_166(+)	Solyc01g079980.2.1	594	-69.25	Xylanase inhibitor (Fragment) (AHRD V1 **-- Q53IQ3_WHEAT); contains Interpro domain(s) IPR001461 Peptidase A1
11_1518_166(+)	Solyc09g065000.2.1	582	-58.51	Xylanase inhibitor (Fragment) (AHRD V1 **-- Q53IQ4_WHEAT); contains Interpro domain(s) IPR001461 Peptidase A1
11_1518_166(+)	Solyc01g007640.2.1	591	-70.83	Ycf2 (AHRD V1 ***- D2KLP5_OLEEU); contains Interpro domain(s) IPR008543 Chloroplast Ycf2
11_1518_166(+)	Solyc07g018210.2.1	593	-68.76	Yip1 domain containing protein expressed (AHRD V1 **-- D8L9M4_WHEAT); contains Interpro domain(s) IPR006977 Yip1 domain
11_1518_166(+)	Solyc07g018220.2.1	593	-68.76	Yip1 domain containing protein expressed (AHRD V1 **-- D8L9M4_WHEAT); contains Interpro domain(s) IPR006977 Yip1 domain
11_1518_166(+)	Solyc05g032850.2.1	601	-67.99	YTH domain family 2 (Predicted) (AHRD V1 *-*- B2GUU1_RAT); contains Interpro domain(s) IPR007275 YT521-B-like protein
11_1518_166(+)	Solyc05g006410.2.1	583	-63.65	Zinc finger MYND-type containing 15 (AHRD V1 ***- A2A642_MOUSE); contains Interpro domain(s) IPR002893 Zinc finger, MYND-type
11_1518_166(+)	Solyc02g067620.1.1	762	-87.71	Zinc transporter like 1 (AHRD V1 *-*- Q9JKN2_MOUSE); contains Interpro domain(s) IPR002524 Cation efflux protein
11_1518_229(+)	Solyc09g092380.2.1	605	-70.42	Adenosylhomocysteinase (AHRD V1 **** Q2XTD0_SOLTU); contains Interpro domain(s) IPR000043 S-adenosyl-L-homocysteine hydrolase
11_1518_229(+)	Solyc07g007930.2.1	589	-62.88	Alkaline alpha galactosidase 2 (AHRD V1 **-- Q575Z7_MAIZE); contains Interpro domain(s) IPR008811 Raffinose synthase
11_1518_229(+)	Solyc01g060180.2.1	584	-55.14	AMP-dependent synthetase and ligase (AHRD V1 ***- A1U2F4_MARAV); contains Interpro domain(s) IPR000873 AMP-dependent synthetase and ligase
11_1518_229(+)	Solyc05g009210.1.1	604	-50.79	At1g67050 (Fragment) (AHRD V1 *-*- B0FU30_ARATH)
11_1518_229(+)	Solyc09g065700.2.1	730	-76.14	Beige/BEACH domain containing protein (AHRD V1 *--- A8PYX1_BRUMA); contains Interpro domain(s) IPR000409 Beige/BEACH
11_1518_229(+)	Solyc04g079830.2.1	762	-73.97	BEL1-like homeodomain protein 2 (AHRD V1 *--- BLH2_ARATH); contains Interpro domain(s) IPR006563 POX
11_1518_229(+)	Solyc05g054030.2.1	590	-52.82	C2H2L domain class transcription factor (AHRD V1 **-* D9ZIU3_MALDO); contains Interpro domain(s) IPR007087 Zinc finger, C2H2-type
11_1518_229(+)	Solyc08g016160.2.1	582	-62.57	Cation/H(+) antiporter 15 (AHRD V1 **** CHX15_ARATH); contains Interpro domain(s) IPR006153 Cation/H+ exchanger
11_1518_229(+)	Solyc11g062010.1.1	737	-77.27	Chromodomain-helicase-DNA-binding protein 1 (AHRD V1 *--- CHD1_DROME); contains Interpro domain(s) IPR000330 SNF2-related
11_1518_229(+)	Solyc08g005610.2.1	625	-52.43	Cytochrome P450
11_1518_229(+)	Solyc08g074370.2.1	607	-66.91	DDB1- and CUL4-associated factor homolog 1 (AHRD V1 **-- DCAF1_ARATH); contains Interpro domain(s) IPR017986 WD40 repeat, region
11_1518_229(+)	Solyc09g013130.2.1	568	-52.64	Defective in exine formation (AHRD V1 **-- Q9FV30_ARATH); contains Interpro domain(s) IPR013517 FG-GAP
11_1518_229(+)	Solyc08g013740.2.1	781	-83.25	Dehydration-responsive family protein (AHRD V1 ***- D7KIG1_ARALY); contains Interpro domain(s) IPR004159 Protein of unknown function DUF248, methyltransferase putative
11_1518_229(+)	Solyc02g089260.2.1	1026	-110.62	E3 ubiquitin-protein ligase UBR4 (AHRD V1 *--- UBR4_HUMAN); contains Interpro domain(s) IPR013993 Zinc finger, N-recognin, metazoa
11_1518_229(+)	Solyc08g006810.1.1	595	-63.67	Fasciclin-like arabinogalactan protein 17 (AHRD V1 *-*- A9XTM2_GOSHI); contains Interpro domain(s) IPR000782 FAS1 domain
11_1518_229(+)	Solyc11g072680.1.1	738	-97.43	Fasciclin-like arabinogalactan protein 21 (AHRD V1 *-*- FLA21_ARATH); contains Interpro domain(s) IPR000782 FAS1 domain
11_1518_229(+)	Solyc05g006430.1.1	788	-78.47	Formin 3 (AHRD V1 *-*- D0QAN4_ARATH); contains Interpro domain(s) IPR015425 Actin-binding FH2
11_1518_229(+)	Solyc12g008830.1.1	586	-69.11	GATA transcription factor 20 (AHRD V1 *-*- B6SS40_MAIZE); contains Interpro domain(s) IPR000679 Zinc finger, GATA-type
11_1518_229(+)	Solyc01g111080.2.1	1876	-194.21	Gibberellin-regulated protein 2 (AHRD V1 *--- B6UGG6_MAIZE); contains Interpro domain(s) IPR003854 Gibberellin regulated protein
11_1518_229(+)	Solyc08g078510.2.1	600	-56.22	GRAM-containing/ABA-responsive protein (Fragment) (AHRD V1 *--- C6FBP1_PSEMZ); contains Interpro domain(s) IPR004182 GRAM
11_1518_229(+)	Solyc02g014130.1.1	576	-64.74	Hepatoma-derived growth factor-related protein 3 (AHRD V1 *--* C1BWG5_ESOLU); contains Interpro domain(s) IPR006569 Regulation of nuclear pre-mRNA protein
11_1518_229(+)	Solyc01g006880.2.1	702	-67.26	Histone-lysine N-methyltransferase (AHRD V1 *-*- B6JWJ3_SCHJY); contains Interpro domain(s) IPR001214 SET
11_1518_229(+)	Solyc08g014580.2.1	593	-67.43	Inositol-1,4,5-trisphosphate 5-phosphatase 1 (AHRD V1 *-** SYJ1_SCHPO); contains Interpro domain(s) IPR000300 Inositol polyphosphate related phosphatase
11_1518_229(+)	Solyc01g098980.2.1	573	-63.12	Kinesin (AHRD V1 *-*- A6YTD6_CUCME); contains Interpro domain(s) IPR015748 Mitogen activated protein kinase kinase kinase 3
11_1518_229(+)	Solyc01g056310.2.1	716	-71.21	Laccase-2 (AHRD V1 **-- LAC2_ORYSJ); contains Interpro domain(s) IPR011707 Multicopper oxidase, type 3
11_1518_229(+)	Solyc09g005600.2.1	759	-74.3	Lethal(2) giant larvae protein homolog 2 (AHRD V1 *--- L2GL2_PONAB); contains Interpro domain(s) IPR011046 WD40 repeat-like
11_1518_229(+)	Solyc11g005150.1.1	580	-71.28	Leucine-rich repeat family protein (AHRD V1 *--- D7M406_ARALY); contains Interpro domain(s) IPR006706 Extensin-like region
11_1518_229(+)	Solyc10g007310.1.1	638	-68.64	Light-dependent short hypocotyls 1 (AHRD V1 *-*- D7M6V0_ARALY); contains Interpro domain(s) IPR006936 Protein of unknown function DUF640
11_1518_229(+)	Solyc11g008830.1.1	593	-58.47	LOB domain protein (AHRD V1 *-*- Q9AS62_ORYSJ); contains Interpro domain(s) IPR004883 Lateral organ boundaries, LOB
11_1518_229(+)	Solyc04g072260.1.1	575	-65.06	Midasin (AHRD V1 ***- B9MXW7_POPTR); contains Interpro domain(s) IPR012099 Midasin
11_1518_229(+)	Solyc11g072800.1.1	588	-51.17	NADPH oxidase (AHRD V1 ***- Q8W4X7_TOBAC); contains Interpro domain(s) IPR013121 Ferric reductase, NAD binding
11_1518_229(+)	Solyc07g008490.2.1	571	-62.57	Nucleic acid binding protein (AHRD V1 **** B6TJ76_MAIZE); contains Interpro domain(s) IPR018111 K Homology, type 1, subgroup
11_1518_229(+)	Solyc04g007280.2.1	732	-79.35	Nup98 protein (Fragment) (AHRD V1 *--- Q68G59_MOUSE); contains Interpro domain(s) IPR007230 Peptidase S59, nucleoporin
11_1518_229(+)	Solyc03g118870.2.1	571	-71.23	Octicosapeptide/Phox/Bem1p domain-containing protein (AHRD V1 **-- D7L8F8_ARALY); contains Interpro domain(s) IPR000270 Octicosapeptide/Phox/Bem1p
11_1518_229(+)	Solyc09g008780.2.1	614	-69.28	Os01g0786800 protein (Fragment) (AHRD V1 *-*- Q0JIP0_ORYSJ); contains Interpro domain(s) IPR002781 Protein of unknown function DUF81
11_1518_229(+)	Solyc01g099930.2.1	583	-78.47	Pectinesterase (Fragment) (AHRD V1 *-*- D7U9X3_VITVI)
11_1518_229(+)	Solyc01g066050.2.1	575	-57.79	Peptidyl-prolyl cis-trans isomerase FKBP5 (AHRD V1 *--- FKBP5_HUMAN); contains Interpro domain(s) IPR011990 Tetratricopeptide-like helical
11_1518_229(+)	Solyc02g090070.2.1	720	-85.44	Phototropic-responsive NPH3 family protein (AHRD V1 **-- D7MMF7_ARALY); contains Interpro domain(s) IPR004249 NPH3
11_1518_229(+)	Solyc02g087000.2.1	763	-74.72	Potassium transporter (AHRD V1 **** D2JYH2_GOSHI); contains Interpro domain(s) IPR018519 Potassium uptake protein, kup IPR003855 K+ potassium transporter
11_1518_229(+)	Solyc07g009130.2.1	603	-59.71	Potassium-transporting ATPase B chain (AHRD V1 *-*- ATKB_BACHK); contains Interpro domain(s) IPR006404 ATPase, P-type, heavy metal-(Cd/Co/Hg/Pb/Zn)-translocating
11_1518_229(+)	Solyc01g109080.2.1	874	-83.91	Protein kinase (AHRD V1 *-*- D3AX52_POLPA); contains Interpro domain(s) IPR000403 Phosphatidylinositol 3- and 4-kinase, catalytic
11_1518_229(+)	Solyc01g086750.2.1	601	-62.07	Protein TIF31 homolog (AHRD V1 ***- TIF31_COCIM); contains Interpro domain(s) IPR011990 Tetratricopeptide-like helical
11_1518_229(+)	Solyc09g091480.2.1	584	-62.03	Ring finger protein 12 (AHRD V1 *-*- Q4V889_RAT); contains Interpro domain(s) IPR018957 Zinc finger, C3HC4 RING-type
11_1518_229(+)	Solyc04g074310.2.1	583	-66.12	RNA-binding protein 68390-68829 (AHRD V1 *--- Q9C805_ARATH); contains Interpro domain(s) IPR000504 RNA recognition motif, RNP-1
11_1518_229(+)	Solyc04g049580.2.1	722	-71.89	Similarity the ORF shows strong similarity to EST 5419 - Aspergillus oryzae (AHRD V1 ***- A2Q8A7_ASPNC)
11_1518_229(+)	Solyc01g106940.2.1	587	-52.28	Single myb histone 4 (Fragment) (AHRD V1 *--- A6MZD9_ORYSI); contains Interpro domain(s) IPR005818 Histone H1/H5
11_1518_229(+)	Solyc06g068430.2.1	595	-71.75	Sister chromatid cohesion protein PDS5 homolog A (AHRD V1 *--- PDS5A_MOUSE); contains Interpro domain(s) IPR002999 Tudor domain
11_1518_229(+)	Solyc05g007420.1.1	591	-61.15	TCP family transcription factor (AHRD V1 *-*- A6MCZ2_9ORYZ); contains Interpro domain(s) IPR005333 Transcription factor, TCP
11_1518_229(+)	Solyc09g075830.2.1	1041	-131.03	Time for coffee (AHRD V1 *--- D7L1P0_ARALY)
11_1518_229(+)	Solyc06g059750.2.1	607	-68.49	Transcriptional corepressor SEUSS (AHRD V1 *--- SEUSS_ARATH)
11_1518_229(+)	Solyc09g009250.2.1	596	-53.08	Trihelix transcription factor (AHRD V1 **-* Q6Q6T0_ARATH); contains Interpro domain(s) IPR017877 MYB-like
11_1518_229(+)	Solyc06g017970.2.1	869	-89.45	Ubiquitin carboxyl-terminal hydrolase (Fragment) (AHRD V1 *--- D8UG84_VOLCA); contains Interpro domain(s) IPR002083 MATH
11_1518_229(+)	Solyc01g110700.2.1	6850	-653.6	Unknown Protein (AHRD V1)
11_1518_229(+)	Solyc01g111180.2.1	6247	-599.69	Unknown Protein (AHRD V1)
11_1518_229(+)	Solyc07g021720.1.1	864	-106.31	Unknown Protein (AHRD V1)
11_1518_229(+)	Solyc09g065350.1.1	742	-80.62	Unknown Protein (AHRD V1)
11_1518_229(+)	Solyc10g006940.1.1	628	-75.47	Unknown Protein (AHRD V1)
11_1518_229(+)	Solyc05g008440.1.1	622	-84.44	Unknown Protein (AHRD V1)
11_1518_229(+)	Solyc01g100290.2.1	609	-56.24	Unknown Protein (AHRD V1)
11_1518_229(+)	Solyc01g079640.2.1	592	-63.65	Unknown Protein (AHRD V1)
11_1518_229(+)	Solyc04g039640.2.1	591	-57.64	Unknown Protein (AHRD V1)
11_1518_229(+)	Solyc06g010140.1.1	588	-76.27	Unknown Protein (AHRD V1)
11_1518_229(+)	Solyc10g005970.1.1	585	-58.26	Unknown Protein (AHRD V1)
11_1518_229(+)	Solyc12g026360.1.1	576	-67.35	Unknown Protein (AHRD V1)
11_1518_229(+)	Solyc08g059780.1.1	1653	-174.31	Unknown Protein (AHRD V1); contains Interpro domain(s) IPR001991 Sodium:dicarboxylate symporter
11_1518_229(+)	Solyc10g080530.1.1	604	-68.01	Unknown Protein (AHRD V1); contains Interpro domain(s) IPR014977 WRC
11_1518_229(+)	Solyc03g115810.2.1	582	-66.82	Vacuolar fusion protein mon1 (AHRD V1 ***- C5JTA2_AJEDS); contains Interpro domain(s) IPR004353 Vacuolar fusion protein MON1
11_1518_229(+)	Solyc04g073950.1.1	729	-68.47	VQ motif family protein expressed (AHRD V1 *-*- Q10KE8_ORYSJ); contains Interpro domain(s) IPR008889 VQ
11_1518_229(+)	Solyc07g056280.2.1	601	-62.1	WRKY transcription factor 16 (AHRD V1 *-*- Q7X7E3_ORYSJ); contains Interpro domain(s) IPR003657 DNA-binding WRKY
11_1518_229(+)	Solyc05g053380.2.1	591	-75	WRKY transcription factor 31 (AHRD V1 *-*- C9DI20_9ROSI); contains Interpro domain(s) IPR003657 DNA-binding WRKY
11_1518_229(+)	Solyc09g065670.2.1	600	-59.38	Zinc finger family protein (AHRD V1 *-*- D7MN23_ARALY); contains Interpro domain(s) IPR007087 Zinc finger, C2H2-type
11_1518_229(+)	Solyc08g063040.2.1	596	-59.25	Zinc finger protein (AHRD V1 *-*- Q9LVQ7_ARATH); contains Interpro domain(s) IPR007087 Zinc finger, C2H2-type
11_1518_229(+)	Solyc04g080490.2.1	594	-74.94	Zinc finger-homeodomain protein 1 (Fragment) (AHRD V1 *--- B0LK17_YUCFI); contains Interpro domain(s) IPR006456 ZF-HD homeobox protein Cys/His-rich dimerisation region
11_1518_250(+)	Solyc06g069500.2.1	717	-85.34	Genomic DNA chromosome 5 P1 clone MXM12 (AHRD V1 *-*- Q9SD86_ARATH)
11_1518_250(+)	Solyc01g108670.2.1	588	-72.88	Kinesin-like protein (AHRD V1 *-*- Q75LL2_ORYSJ); contains Interpro domain(s) IPR001752 Kinesin, motor region
11_1518_250(+)	Solyc03g112660.2.1	590	-71.78	MOS1 (AHRD V1 *-*- D9IVG9_ARATH); contains Interpro domain(s) IPR009738 BAT2, N-terminal
11_1518_250(+)	Solyc01g110700.2.1	2350	-282.17	Unknown Protein (AHRD V1)
11_1518_250(+)	Solyc01g111180.2.1	2350	-282.17	Unknown Protein (AHRD V1)
11_1518_250(+)	Solyc08g077500.2.1	579	-67.85	Vacuolar protein sorting-associated protein (AHRD V1 *-*- D3BBX0_POLPA); contains Interpro domain(s) IPR001849 Pleckstrin homology
11_1518_271(+)	Solyc01g110700.2.1	1709	-165.29	Unknown Protein (AHRD V1)
11_1518_271(+)	Solyc01g111180.2.1	1705	-162.85	Unknown Protein (AHRD V1)
11_1518_271(+)	Solyc08g059780.1.1	724	-82.56	Unknown Protein (AHRD V1); contains Interpro domain(s) IPR001991 Sodium:dicarboxylate symporter
11_2273_1539(+)	Solyc02g069670.2.1	732	-75.42	Alpha-glucosidase 1 (AHRD V1 **** O22444_ARATH); contains Interpro domain(s) IPR000322 Glycoside hydrolase, family 31
11_2273_1539(+)	Solyc01g059980.2.1	572	-51.78	Beta-glucanase (AHRD V1 ***- Q53X08_NICPL); contains Interpro domain(s) IPR000490 Glycoside hydrolase, family 17
11_2273_1539(+)	Solyc05g007570.2.1	590	-105.56	cDNA clone J023065D24 full insert sequence (AHRD V1 *-*- B7EKP5_ORYSJ); contains Interpro domain(s) IPR012870 Protein of unknown function DUF1666
11_2273_1539(+)	Solyc02g083350.2.1	579	-61.18	DNA-directed RNA polymerase (AHRD V1 ***- B9SXC0_RICCO); contains Interpro domain(s) IPR006592 RNA polymerase, N-terminal
11_2273_1539(+)	Solyc01g044480.2.1	729	-86.01	Elongation factor P (AHRD V1 ***- B6TAH3_MAIZE); contains Interpro domain(s) IPR008991 Translation protein SH3-like
11_2273_1539(+)	Solyc01g111080.2.1	572	-57.38	Gibberellin-regulated protein 2 (AHRD V1 *--- B6UGG6_MAIZE); contains Interpro domain(s) IPR003854 Gibberellin regulated protein
11_2273_1539(+)	Solyc08g007790.2.1	588	-59.64	Hydroxymethylglutaryl-CoA synthase (AHRD V1 **** A9ZMZ7_HEVBR); contains Interpro domain(s) IPR010122 Hydroxymethylglutaryl-CoA synthase, eukaryotic IPR013746 Hydroxymethylglutaryl-coenzyme A synthase C-terminal IPR000590 Hydroxymethylglutaryl-coenzyme A synthase, active site
11_2273_1539(+)	Solyc03g082680.2.1	727	-80.87	Neuroblastoma-amplified protein-like protein (AHRD V1 *-*- D2V0U7_NAEGR); contains Interpro domain(s) IPR011046 WD40 repeat-like
11_2273_1539(+)	Solyc01g110040.2.1	581	-58.16	Transducin family protein (AHRD V1 ***- D7L1V6_ARALY)
11_2273_1539(+)	Solyc01g111530.2.1	592	-76.41	Ubiquitin-protein ligase 4 (AHRD V1 *-** D7M7X1_ARALY); contains Interpro domain(s) IPR000569 HECT
11_2273_1539(+)	Solyc01g111180.2.1	4423	-494.32	Unknown Protein (AHRD V1)
11_2273_1539(+)	Solyc01g110700.2.1	4401	-476.19	Unknown Protein (AHRD V1)
11_2273_1539(+)	Solyc04g055050.1.1	574	-52.28	VQ motif family protein expressed (AHRD V1 *-*- Q10KE8_ORYSJ); contains Interpro domain(s) IPR008889 VQ
11_2273_1686(+)	Solyc01g110700.2.1	593	-84.54	Unknown Protein (AHRD V1)
11_2273_1686(+)	Solyc01g111180.2.1	593	-84.54	Unknown Protein (AHRD V1)
11_2435_868(+)	Solyc01g110700.2.1	593	-84.54	Unknown Protein (AHRD V1)
11_2435_868(+)	Solyc01g111180.2.1	593	-84.54	Unknown Protein (AHRD V1)
11_2515_1274(+)	Solyc09g008490.2.1	593	-95.75	HEAT repeat family protein expressed (AHRD V1 *-*- Q10RT3_ORYSJ); contains Interpro domain(s) IPR011989 Armadillo-like helical
11_2515_1274(+)	Solyc01g110700.2.1	592	-90.19	Unknown Protein (AHRD V1)
11_2515_1274(+)	Solyc01g111180.2.1	592	-90.19	Unknown Protein (AHRD V1)
11_2522_1482(+)	Solyc04g074180.2.1	604	-66.51	Cryptochrome 1a
11_2522_1482(+)	Solyc07g063020.1.1	1033	-93.53	CT099 (Fragment) (AHRD V1 *-*- Q4KR07_SOLPE); contains Interpro domain(s) IPR008972 Cupredoxin
11_2522_1482(+)	Solyc01g111080.2.1	999	-87.57	Gibberellin-regulated protein 2 (AHRD V1 *--- B6UGG6_MAIZE); contains Interpro domain(s) IPR003854 Gibberellin regulated protein
11_2522_1482(+)	Solyc08g008240.2.1	870	-73.82	Kinase family protein (AHRD V1 ***- D7KSS6_ARALY); contains Interpro domain(s) IPR010632 Protein of unknown function DUF1221
11_2522_1482(+)	Solyc12g049190.1.1	599	-65.72	LRR receptor-like serine/threonine-protein kinase, RLP
11_2522_1482(+)	Solyc03g082680.2.1	577	-54.62	Neuroblastoma-amplified protein-like protein (AHRD V1 *-*- D2V0U7_NAEGR); contains Interpro domain(s) IPR011046 WD40 repeat-like
11_2522_1482(+)	Solyc04g076210.2.1	583	-65.39	Ubiquitin carboxyl-terminal hydrolase family protein (AHRD V1 *-*- D7MB42_ARALY); contains Interpro domain(s) IPR001394 Peptidase C19, ubiquitin carboxyl-terminal hydrolase 2
11_2522_1482(+)	Solyc04g076620.2.1	723	-69.63	Ubiquitin-protein ligase 1 (AHRD V1 *-** D7KN29_ARALY); contains Interpro domain(s) IPR000569 HECT
11_2522_1482(+)	Solyc01g110700.2.1	6576	-669.95	Unknown Protein (AHRD V1)
11_2522_1482(+)	Solyc01g111180.2.1	6274	-645.82	Unknown Protein (AHRD V1)
11_2522_1482(+)	Solyc07g041520.2.1	878	-88.28	Unknown Protein (AHRD V1)
11_2522_1482(+)	Solyc04g051550.1.1	719	-75.82	Unknown Protein (AHRD V1)
11_2522_1482(+)	Solyc02g067620.1.1	586	-69.37	Zinc transporter like 1 (AHRD V1 *-*- Q9JKN2_MOUSE); contains Interpro domain(s) IPR002524 Cation efflux protein
11_874_165(+)	Solyc04g081100.2.1	726	-65.62	Amine oxidase (AHRD V1 *-*- A4RUP0_OSTLU); contains Interpro domain(s) IPR002937 Amine oxidase
11_874_165(+)	Solyc03g097670.2.1	571	-61.28	ATP binding protein (AHRD V1 **-- D7LS09_ARALY); contains Interpro domain(s) IPR003594 ATP-binding region, ATPase-like
11_874_165(+)	Solyc02g092450.2.1	1045	-92.09	Calcium-transporting ATPase 1 (AHRD V1 ***- Q7XBH9_CERRI); contains Interpro domain(s) IPR006408 ATPase, P-type, calcium-transporting, PMCA-type
11_874_165(+)	Solyc02g064680.2.1	627	-62.32	Calcium-transporting ATPase 1 (AHRD V1 ***- Q7XBH9_CERRI); contains Interpro domain(s) IPR006408 ATPase, P-type, calcium-transporting, PMCA-type
11_874_165(+)	Solyc10g079300.1.1	611	-68.52	Calcium-transporting ATPase 1 (AHRD V1 ***- Q7XBH9_CERRI); contains Interpro domain(s) IPR006408 ATPase, P-type, calcium-transporting, PMCA-type
11_874_165(+)	Solyc04g016260.2.1	637	-67.49	Calcium-transporting ATPase 1 (AHRD V1 **** Q7XBH9_CERRI); contains Interpro domain(s) IPR006408 ATPase, P-type, calcium-transporting, PMCA-type
11_874_165(+)	Solyc01g081330.2.1	593	-50.81	Chaperone protein dnaJ (AHRD V1 ***- B6TA99_MAIZE); contains Interpro domain(s) IPR003095 Heat shock protein DnaJ
11_874_165(+)	Solyc03g007100.2.1	589	-57.17	Cleavage and polyadenylation specificity factor subunit A (AHRD V1 *--- C1H240_PARBA); contains Interpro domain(s) IPR004871 Cleavage and polyadenylation specificity factor, A subunit, C-terminal
11_874_165(+)	Solyc01g044480.2.1	1008	-88.09	Elongation factor P (AHRD V1 ***- B6TAH3_MAIZE); contains Interpro domain(s) IPR008991 Translation protein SH3-like
11_874_165(+)	Solyc09g065550.2.1	712	-68.33	Kinase interacting family protein (AHRD V1 *--- D7KCB2_ARALY); contains Interpro domain(s) IPR011684 KIP1-like
11_874_165(+)	Solyc03g117540.2.1	601	-67.99	Multidrug resistance protein ABC transporter family (AHRD V1 **-- B9I191_POPTR); contains Interpro domain(s) IPR001140 ABC transporter, transmembrane region
11_874_165(+)	Solyc03g082680.2.1	730	-67.26	Neuroblastoma-amplified protein-like protein (AHRD V1 *-*- D2V0U7_NAEGR); contains Interpro domain(s) IPR011046 WD40 repeat-like
11_874_165(+)	Solyc04g072630.2.1	725	-58.25	Os10g0363700 protein (Fragment) (AHRD V1 *-*- Q0IY59_ORYSJ)
11_874_165(+)	Solyc09g092240.2.1	729	-73.01	Small subunit processome component 20 homolog (AHRD V1 **-- UTP20_MOUSE); contains Interpro domain(s) IPR011430 Down-regulated in metastasis
11_874_165(+)	Solyc04g076620.2.1	602	-58.13	Ubiquitin-protein ligase 1 (AHRD V1 *-** D7KN29_ARALY); contains Interpro domain(s) IPR000569 HECT
11_874_165(+)	Solyc01g111180.2.1	5034	-446.86	Unknown Protein (AHRD V1)
11_874_165(+)	Solyc01g110700.2.1	4739	-415.23	Unknown Protein (AHRD V1)
11_874_165(+)	Solyc08g029040.1.1	630	-74.69	Unknown Protein (AHRD V1)
11_874_165(+)	Solyc09g059420.1.1	624	-62.02	Unknown Protein (AHRD V1)
11_874_165(+)	Solyc05g018580.1.1	585	-75.83	Unknown Protein (AHRD V1)
11_874_165(+)	Solyc12g062960.1.1	921	-112.25	Unknown Protein (AHRD V1); contains Interpro domain(s) IPR000434 Polycystic kidney disease type 1 protein
11_874_165(+)	Solyc12g062990.1.1	1191	-142.28	Unknown Protein (AHRD V1); contains Interpro domain(s) IPR000515 Binding-protein-dependent transport systems inner membrane component
11_874_165(+)	Solyc12g063000.1.1	2883	-322.69	Unknown Protein (AHRD V1); contains Interpro domain(s) IPR001463 Sodium:alanine symporter
11_874_165(+)	Solyc01g034220.1.1	759	-93.05	Unknown Protein (AHRD V1); contains Interpro domain(s) IPR001463 Sodium:alanine symporter
11_874_165(+)	Solyc12g062950.1.1	740	-90.9	Unknown Protein (AHRD V1); contains Interpro domain(s) IPR001463 Sodium:alanine symporter
11_874_165(+)	Solyc10g050020.1.1	591	-65.32	Unknown Protein (AHRD V1); contains Interpro domain(s) IPR001734 Sodium/solute symporter
11_874_165(+)	Solyc07g038150.1.1	730	-83.09	Unknown Protein (AHRD V1); contains Interpro domain(s) IPR001991 Sodium:dicarboxylate symporter
11_874_165(+)	Solyc12g062980.1.1	2218	-273.62	Unknown Protein (AHRD V1); contains Interpro domain(s) IPR017452 GPCR, rhodopsin-like superfamily
11_874_165(+)	Solyc07g008080.2.1	596	-56.9	WD repeat-containing protein 11 (AHRD V1 **-- WDR11_HUMAN); contains Interpro domain(s) IPR011046 WD40 repeat-like
11_874_543(+)	Solyc11g062010.1.1	612	-65.59	Chromodomain-helicase-DNA-binding protein 1 (AHRD V1 *--- CHD1_DROME); contains Interpro domain(s) IPR000330 SNF2-related
11_874_543(+)	Solyc04g015720.1.1	4996	-582.44	Coiled-coil-containing protein (Fragment) (AHRD V1 *--- A7TZ74_9MAXI)
11_874_543(+)	Solyc06g064700.1.1	5109	-589.12	Coiled-coil-containing protein (Fragment) (AHRD V1 *-*- A7TZ74_9MAXI)
11_874_543(+)	Solyc01g065910.1.1	5382	-622.69	Periaxin-like protein (AHRD V1 *--- Q940G9_ARATH)
11_874_543(+)	Solyc01g105730.1.1	5311	-620.33	Periaxin-like protein (AHRD V1 *--- Q9LXB8_ARATH)
11_874_543(+)	Solyc06g064730.1.1	4838	-563.22	Serine rich protein (Fragment) (AHRD V1 *--- Q94563_ENTHI)
11_874_543(+)	Solyc01g110040.2.1	891	-102.83	Transducin family protein (AHRD V1 ***- D7L1V6_ARALY)
11_874_543(+)	Solyc01g105740.1.1	3922	-449.67	Unknown Protein (AHRD V1)
11_874_543(+)	Solyc01g110700.2.1	2491	-257.4	Unknown Protein (AHRD V1)
11_874_543(+)	Solyc01g111180.2.1	2351	-243.41	Unknown Protein (AHRD V1)
11_874_543(+)	Solyc09g064560.1.1	1331	-154.76	Unknown Protein (AHRD V1)
11_874_543(+)	Solyc09g064570.1.1	894	-110.9	Unknown Protein (AHRD V1)
11_874_79(-)	Solyc04g076540.2.1	768	-74.65	Aberrant pollen transmission 1 (AHRD V1 **-- Q4JQG0_MAIZE); contains Interpro domain(s) IPR019443 Protein of unknown function FMP27, domain-6, C-terminal
11_874_79(-)	Solyc06g059910.2.1	871	-52.49	Alpha-humulene/(-)-(E)-beta-caryophyllene synthase (AHRD V1 **** HUMS_ARATH); contains Interpro domain(s) IPR005630 Terpene synthase, metal-binding domain
11_874_79(-)	Solyc01g111080.2.1	1152	-76.81	Gibberellin-regulated protein 2 (AHRD V1 *--- B6UGG6_MAIZE); contains Interpro domain(s) IPR003854 Gibberellin regulated protein
11_874_79(-)	Solyc12g013590.1.1	746	-52.7	Helicase sen1 (AHRD V1 *--- B6K5E8_SCHJY)
11_874_79(-)	Solyc02g078640.2.1	614	-50.93	Microtubule associated protein (AHRD V1 *--* A8J2Q6_CHLRE); contains Interpro domain(s) IPR011989 Armadillo-like helical
11_874_79(-)	Solyc03g093480.2.1	755	-58.43	U3 small nucleolar RNA-associated protein 10 (AHRD V1 *--- C8VGG5_EMENI); contains Interpro domain(s) IPR012954 BP28, C-terminal
11_874_79(-)	Solyc01g111180.2.1	6095	-421.87	Unknown Protein (AHRD V1)
11_874_79(-)	Solyc01g110700.2.1	5571	-382.15	Unknown Protein (AHRD V1)
11_874_79(-)	Solyc03g058550.1.1	1776	-156.27	Unknown Protein (AHRD V1)
11_874_79(-)	Solyc07g020950.1.1	1755	-148.95	Unknown Protein (AHRD V1)
11_874_79(-)	Solyc07g020930.1.1	1619	-157.62	Unknown Protein (AHRD V1)
11_874_79(-)	Solyc01g017930.1.1	1478	-115.28	Unknown Protein (AHRD V1)
11_874_79(-)	Solyc10g062300.1.1	1318	-122.05	Unknown Protein (AHRD V1)
11_874_79(-)	Solyc03g065130.1.1	1173	-92.42	Unknown Protein (AHRD V1)
11_874_79(-)	Solyc01g017990.1.1	1166	-105.64	Unknown Protein (AHRD V1)
11_874_79(-)	Solyc03g013530.1.1	1162	-92.7	Unknown Protein (AHRD V1)
11_874_79(-)	Solyc06g019140.1.1	1158	-92.39	Unknown Protein (AHRD V1)
11_874_79(-)	Solyc06g019120.1.1	1045	-88.56	Unknown Protein (AHRD V1)
11_874_79(-)	Solyc01g017950.1.1	1040	-79.12	Unknown Protein (AHRD V1)
11_874_79(-)	Solyc03g058530.1.1	1030	-111.77	Unknown Protein (AHRD V1)
11_874_79(-)	Solyc01g018000.1.1	1017	-78.96	Unknown Protein (AHRD V1)
11_874_79(-)	Solyc06g008570.1.1	1002	-52.45	Unknown Protein (AHRD V1)
11_874_79(-)	Solyc01g017970.1.1	998	-76.51	Unknown Protein (AHRD V1)
11_874_79(-)	Solyc03g065080.1.1	898	-62.74	Unknown Protein (AHRD V1)
11_874_79(-)	Solyc10g061910.1.1	896	-80.4	Unknown Protein (AHRD V1)
11_874_79(-)	Solyc10g062320.1.1	893	-82.15	Unknown Protein (AHRD V1)
11_874_79(-)	Solyc06g010150.1.1	871	-83.38	Unknown Protein (AHRD V1)
11_874_79(-)	Solyc03g062970.1.1	863	-68.17	Unknown Protein (AHRD V1)
11_874_79(-)	Solyc10g061920.1.1	738	-66.9	Unknown Protein (AHRD V1)
11_874_79(-)	Solyc06g019130.1.1	732	-61.1	Unknown Protein (AHRD V1)
11_874_79(-)	Solyc01g017960.1.1	711	-50.46	Unknown Protein (AHRD V1)
11_874_79(-)	Solyc03g058580.1.1	707	-54.57	Unknown Protein (AHRD V1)
11_874_79(-)	Solyc10g062280.1.1	598	-60.58	Unknown Protein (AHRD V1)
11_874_79(-)	Solyc03g013560.1.1	596	-51.18	Unknown Protein (AHRD V1)
11_874_79(-)	Solyc03g062980.1.1	590	-56.85	Unknown Protein (AHRD V1)
11_874_79(-)	Solyc03g065070.1.1	575	-53.35	Unknown Protein (AHRD V1)
11_874_79(-)	Solyc10g044660.1.1	576	-56.84	Unknown Protein (AHRD V1); contains Interpro domain(s) IPR000245 ATPase, V0 complex, proteolipid subunit C
11_874_79(-)	Solyc12g062960.1.1	880	-97.46	Unknown Protein (AHRD V1); contains Interpro domain(s) IPR000434 Polycystic kidney disease type 1 protein
11_874_79(-)	Solyc03g065110.1.1	2310	-197.81	Unknown Protein (AHRD V1); contains Interpro domain(s) IPR001451 Bacterial transferase hexapeptide repeat
11_874_79(-)	Solyc12g063000.1.1	1748	-184.9	Unknown Protein (AHRD V1); contains Interpro domain(s) IPR001463 Sodium:alanine symporter
11_874_79(-)	Solyc01g034180.1.1	1302	-127.91	Unknown Protein (AHRD V1); contains Interpro domain(s) IPR001463 Sodium:alanine symporter
11_874_79(-)	Solyc12g062950.1.1	1046	-110.46	Unknown Protein (AHRD V1); contains Interpro domain(s) IPR001463 Sodium:alanine symporter
11_874_79(-)	Solyc01g034220.1.1	719	-83.74	Unknown Protein (AHRD V1); contains Interpro domain(s) IPR001463 Sodium:alanine symporter
11_874_79(-)	Solyc08g059780.1.1	1334	-138.1	Unknown Protein (AHRD V1); contains Interpro domain(s) IPR001991 Sodium:dicarboxylate symporter
11_874_79(-)	Solyc10g062190.1.1	568	-57.34	Unknown Protein (AHRD V1); contains Interpro domain(s) IPR001991 Sodium:dicarboxylate symporter
11_874_79(-)	Solyc12g062970.1.1	1042	-109.31	Unknown Protein (AHRD V1); contains Interpro domain(s) IPR002956 Bride of sevenless protein
11_874_79(-)	Solyc12g062980.1.1	1605	-166.37	Unknown Protein (AHRD V1); contains Interpro domain(s) IPR017452 GPCR, rhodopsin-like superfamily
11_874_79(-)	Solyc10g050010.1.1	1014	-100.03	Unknown Protein (AHRD V1); contains Interpro domain(s) IPR017452 GPCR, rhodopsin-like superfamily
12_434_1052(+)	Solyc03g043890.2.1	595	-58.61	1-aminocyclopropane-1-carboxylate synthase (AHRD V1 **** Q4LDM0_SOLLC); contains Interpro domain(s) IPR004839 Aminotransferase, class I and II IPR004838 Aminotransferases, class-I, pyridoxal-phosphate-binding site
12_434_1052(+)	Solyc09g064440.2.1	585	-69.36	ABC transporter C family member 5 (AHRD V1 **-- AB5C_ARATH); contains Interpro domain(s) IPR001140 ABC transporter, transmembrane region
12_434_1052(+)	Solyc01g101070.2.1	586	-58.66	ABC transporter G family member 37 (AHRD V1 ***- AB37G_ARATH); contains Interpro domain(s) IPR013525 ABC-2 type transporter
12_434_1052(+)	Solyc05g005750.2.1	596	-68.31	Alpha alpha-trehalose-phosphate synthase (UDP-forming) (AHRD V1 **** A3CXN9_METMJ); contains Interpro domain(s) IPR001830 Glycosyl transferase, family 20
12_434_1052(+)	Solyc01g060180.2.1	602	-61.9	AMP-dependent synthetase and ligase (AHRD V1 ***- A1U2F4_MARAV); contains Interpro domain(s) IPR000873 AMP-dependent synthetase and ligase
12_434_1052(+)	Solyc01g056720.2.1	600	-66.36	Aquaporin SIP12 (AHRD V1 ***- D8FSL5_GOSHI); contains Interpro domain(s) IPR000425 Major intrinsic protein
12_434_1052(+)	Solyc05g009210.1.1	755	-89.22	At1g67050 (Fragment) (AHRD V1 *-*- B0FU30_ARATH)
12_434_1052(+)	Solyc05g012030.1.1	602	-64.54	At1g69160/F4N2_9 (AHRD V1 ***- Q93Z37_ARATH)
12_434_1052(+)	Solyc03g097670.2.1	608	-69.45	ATP binding protein (AHRD V1 **-- D7LS09_ARALY); contains Interpro domain(s) IPR003594 ATP-binding region, ATPase-like
12_434_1052(+)	Solyc03g118340.2.1	596	-62.6	ATP-dependent clp protease ATP-binding subunit (AHRD V1 **-* Q85G08_CYAME); contains Interpro domain(s) IPR013093 ATPase associated with various cellular activities, AAA-2
12_434_1052(+)	Solyc06g009070.2.1	597	-77.64	ATP-dependent RNA helicase (AHRD V1 *-*- Q16ZW5_AEDAE); contains Interpro domain(s) IPR014001 DEAD-like helicase, N-terminal
12_434_1052(+)	Solyc12g056740.1.1	594	-57.05	ATP-dependent RNA helicase (AHRD V1 ***- D3BPQ9_POLPA); contains Interpro domain(s) IPR011545 DNA/RNA helicase, DEAD/DEAH box type, N-terminal
12_434_1052(+)	Solyc09g065700.2.1	593	-61.98	Beige/BEACH domain containing protein (AHRD V1 *--- A8PYX1_BRUMA); contains Interpro domain(s) IPR000409 Beige/BEACH
12_434_1052(+)	Solyc06g074120.2.1	604	-60.9	BEL1-like homeodomain protein 1 (AHRD V1 **-- BLH1_ARATH); contains Interpro domain(s) IPR001356 Homeobox IPR017970 Homeobox, conserved site
12_434_1052(+)	Solyc08g081400.2.1	1198	-116.1	BEL1-like homeodomain protein 2 (AHRD V1 *--- BLH2_ARATH); contains Interpro domain(s) IPR006563 POX
12_434_1052(+)	Solyc04g079830.2.1	747	-94.8	BEL1-like homeodomain protein 2 (AHRD V1 *--- BLH2_ARATH); contains Interpro domain(s) IPR006563 POX
12_434_1052(+)	Solyc10g055470.1.1	567	-53.72	Beta-galactosidase (AHRD V1 **** B2LYJ4_PETHY); contains Interpro domain(s) IPR001944 Glycoside hydrolase, family 35
12_434_1052(+)	Solyc01g059980.2.1	1027	-111.49	Beta-glucanase (AHRD V1 ***- Q53X08_NICPL); contains Interpro domain(s) IPR000490 Glycoside hydrolase, family 17
12_434_1052(+)	Solyc04g008500.2.1	752	-83.55	C2H2L domain class transcription factor (AHRD V1 **-* D9ZIU0_MALDO); contains Interpro domain(s) IPR007087 Zinc finger, C2H2-type
12_434_1052(+)	Solyc05g054030.2.1	612	-66.01	C2H2L domain class transcription factor (AHRD V1 **-* D9ZIU3_MALDO); contains Interpro domain(s) IPR007087 Zinc finger, C2H2-type
12_434_1052(+)	Solyc06g050690.2.1	598	-69.43	Cation/H(+) antiporter 15 (AHRD V1 **** CHX15_ARATH); contains Interpro domain(s) IPR006153 Cation/H+ exchanger
12_434_1052(+)	Solyc08g067430.2.1	587	-59.31	cDNA clone 002-182-C01 full insert sequence (AHRD V1 *-*- B7F3P2_ORYSJ)
12_434_1052(+)	Solyc02g087990.2.1	589	-61.41	cDNA clone J023065D24 full insert sequence (AHRD V1 *-*- B7EKP5_ORYSJ); contains Interpro domain(s) IPR012870 Protein of unknown function DUF1666
12_434_1052(+)	Solyc07g006540.2.1	591	-66.03	Chaperone protein ClpB (AHRD V1 *--- C7HTI8_9FIRM)
12_434_1052(+)	Solyc01g094800.2.1	1316	-152.11	Chromodomain-helicase-DNA-binding protein 1 (AHRD V1 *--* CHD1_DROME); contains Interpro domain(s) IPR000330 SNF2-related
12_434_1052(+)	Solyc04g054170.2.1	600	-66.1	CPR5 (Fragment) (AHRD V1 *-*- B0ZWT2_ARATH)
12_434_1052(+)	Solyc05g054570.2.1	591	-71.93	CRAL/TRIO domain containing protein expressed (AHRD V1 **-- Q84TA5_ORYSJ); contains Interpro domain(s) IPR001251 Cellular retinaldehyde-binding/triple function, C-terminal
12_434_1052(+)	Solyc07g063020.1.1	730	-111.72	CT099 (Fragment) (AHRD V1 *-*- Q4KR07_SOLPE); contains Interpro domain(s) IPR008972 Cupredoxin
12_434_1052(+)	Solyc04g079730.1.1	891	-115.79	cytochrome P450
12_434_1052(+)	Solyc12g006860.1.1	621	-60.8	Cytochrome P450
12_434_1052(+)	Solyc07g006140.2.1	589	-59.39	Cytochrome P450
12_434_1052(+)	Solyc08g005610.2.1	587	-58.29	Cytochrome P450
12_434_1052(+)	Solyc02g077960.1.1	616	-71.59	Dof zinc finger protein 12 (AHRD V1 *-*- A5HWG1_HORVD); contains Interpro domain(s) IPR003851 Zinc finger, Dof-type
12_434_1052(+)	Solyc02g089260.2.1	582	-56.57	E3 ubiquitin-protein ligase UBR4 (AHRD V1 *--- UBR4_HUMAN); contains Interpro domain(s) IPR013993 Zinc finger, N-recognin, metazoa
12_434_1052(+)	Solyc12g088230.1.1	1031	-123.91	Early-responsive to dehydration protein-like (AHRD V1 **-- Q5JKX1_ORYSJ); contains Interpro domain(s) IPR003864 Protein of unknown function DUF221
12_434_1052(+)	Solyc09g075440.2.1	580	-52.35	Ethylene receptor (AHRD V1 **** Q41341_SOLLC); contains Interpro domain(s) IPR005467 Signal transduction histidine kinase, core
12_434_1052(+)	Solyc12g009670.1.1	594	-55.65	Exostosin-like (AHRD V1 *-*- A4Q7M7_MEDTR)
12_434_1052(+)	Solyc12g062940.1.1	724	-65.1	Exostosin-like (AHRD V1 ***- Q2HVN7_MEDTR); contains Interpro domain(s) IPR004263 Exostosin-like
12_434_1052(+)	Solyc11g072680.1.1	599	-79.9	Fasciclin-like arabinogalactan protein 21 (AHRD V1 *-*- FLA21_ARATH); contains Interpro domain(s) IPR000782 FAS1 domain
12_434_1052(+)	Solyc07g054590.1.1	590	-52.13	F-box family protein (AHRD V1 *-*- B9I698_POPTR); contains Interpro domain(s) IPR001810 Cyclin-like F-box
12_434_1052(+)	Solyc02g014190.2.1	569	-61.78	Genomic DNA chromosome 5 P1 clone MYJ24 (AHRD V1 **-- Q9FN44_ARATH); contains Interpro domain(s) IPR003594 ATP-binding region, ATPase-like
12_434_1052(+)	Solyc01g111080.2.1	1481	-156.02	Gibberellin-regulated protein 2 (AHRD V1 *--- B6UGG6_MAIZE); contains Interpro domain(s) IPR003854 Gibberellin regulated protein
12_434_1052(+)	Solyc01g073750.2.1	582	-65.64	Glucan synthase like 3 (AHRD V1 ***- D8R8I5_SELML); contains Interpro domain(s) IPR003440 Glycosyl transferase, family 48
12_434_1052(+)	Solyc08g005630.2.1	605	-63.07	Glucose-methanol-choline oxidoreductase (AHRD V1 ***- D6TF66_9CHLR); contains Interpro domain(s) IPR012400 Long-chain fatty alcohol dehydrogenase
12_434_1052(+)	Solyc04g055190.2.1	587	-58.86	Glycerol uptake protein 1 (AHRD V1 **-- B3LHF0_YEAS1); contains Interpro domain(s) IPR004299 Membrane bound O-acyl transferase, MBOAT
12_434_1052(+)	Solyc07g026560.1.1	591	-54.28	Homeodomain-containing transcription factor FWA (AHRD V1 **-* B5BPE9_ARATH); contains Interpro domain(s) IPR002913 Lipid-binding START
12_434_1052(+)	Solyc12g019080.1.1	575	-65.64	Inositol 1 4 5-trisphosphate 5-phosphatase-like protein (AHRD V1 *-*- Q6H453_ORYSJ); contains Interpro domain(s) IPR000300 Inositol polyphosphate related phosphatase
12_434_1052(+)	Solyc04g077210.2.1	601	-64.74	Knotted-like homeobox protein (AHRD V1 ***- Q49RB7_POPTO); contains Interpro domain(s) IPR005541 KNOX2
12_434_1052(+)	Solyc09g005600.2.1	749	-80.76	Lethal(2) giant larvae protein homolog 2 (AHRD V1 *--- L2GL2_PONAB); contains Interpro domain(s) IPR011046 WD40 repeat-like
12_434_1052(+)	Solyc10g007310.1.1	610	-69.87	Light-dependent short hypocotyls 1 (AHRD V1 *-*- D7M6V0_ARALY); contains Interpro domain(s) IPR006936 Protein of unknown function DUF640
12_434_1052(+)	Solyc09g090180.1.1	639	-78.7	Light-dependent short hypocotyls 1 (AHRD V1 ***- D7M6V0_ARALY); contains Interpro domain(s) IPR006936 Protein of unknown function DUF640
12_434_1052(+)	Solyc02g087410.2.1	608	-65.38	Lipid A export ATP-binding/permease protein msbA (AHRD V1 *--- MSBA_CHRVO); contains Interpro domain(s) IPR003439 ABC transporter-like
12_434_1052(+)	Solyc03g025810.2.1	704	-54.08	Low-temperature-induced 65 kDa protein (AHRD V1 *--- LTI65_ARATH); contains Interpro domain(s) IPR012418 CAP160
12_434_1052(+)	Solyc12g009770.1.1	693	-121.54	LRR receptor-like serine/threonine-protein kinase, RLP
12_434_1052(+)	Solyc12g009510.1.1	604	-95.77	LRR receptor-like serine/threonine-protein kinase, RLP
12_434_1052(+)	Solyc10g006350.2.1	611	-70.66	Microtubule-associated protein TORTIFOLIA1 (AHRD V1 *--* B6SS76_MAIZE); contains Interpro domain(s) IPR011989 Armadillo-like helical
12_434_1052(+)	Solyc01g098230.2.1	581	-60.14	Mitochondrial import inner membrane translocase subunit TIM44 (AHRD V1 ***- D7L3P3_ARALY); contains Interpro domain(s) IPR007379 Mitochondrial inner membrane translocase complex, subunit Tim44-related
12_434_1052(+)	Solyc10g007360.2.1	760	-88.39	Multidrug resistance protein mdtK (AHRD V1 ***- MDTK_YERE8); contains Interpro domain(s) IPR002528 Multi antimicrobial extrusion protein MatE
12_434_1052(+)	Solyc08g082750.2.1	586	-71.11	Nodule inception protein (Fragment) (AHRD V1 *-*- A9DM78_MEDTR); contains Interpro domain(s) IPR003035 Plant regulator RWP-RK
12_434_1052(+)	Solyc07g040690.2.1	612	-71.21	NPR1 protein (Fragment) (AHRD V1 ***- A8KRW4_CAPCH); contains Interpro domain(s) IPR002110 Ankyrin
12_434_1052(+)	Solyc10g079460.1.1	614	-63.02	NPR1-like protein (Fragment) (AHRD V1 ***- Q2QBV6_PYRCO); contains Interpro domain(s) IPR013069 BTB/POZ
12_434_1052(+)	Solyc04g040220.2.1	592	-73.9	NPR1-like protein (Fragment) (AHRD V1 ***- Q2QBV6_PYRCO); contains Interpro domain(s) IPR013069 BTB/POZ
12_434_1052(+)	Solyc01g090670.2.1	746	-115.23	Nuclear pore glycoprotein p62 (AHRD V1 *--- C0HBQ2_SALSA); contains Interpro domain(s) IPR007758 Nucleoporin, Nsp1-like, C-terminal
12_434_1052(+)	Solyc01g007260.2.1	619	-66.21	Os04g0416500 protein (Fragment) (AHRD V1 ***- Q0JDA8_ORYSJ); contains Interpro domain(s) IPR004176 Clp, N-terminal
12_434_1052(+)	Solyc01g068460.2.1	604	-69.33	Pathogen-induced calmodulin-binding protein (Fragment) (AHRD V1 *-*- Q8H6W8_PHAVU); contains Interpro domain(s) IPR012417 Calmodulin-binding, plant
12_434_1052(+)	Solyc01g066050.2.1	603	-80.65	Peptidyl-prolyl cis-trans isomerase FKBP5 (AHRD V1 *--- FKBP5_HUMAN); contains Interpro domain(s) IPR011990 Tetratricopeptide-like helical
12_434_1052(+)	Solyc10g044670.1.1	599	-69.58	Phytochrome A
12_434_1052(+)	Solyc09g090490.1.1	761	-84.41	Primary amine oxidase (AHRD V1 ***- B9HV61_POPTR); contains Interpro domain(s) IPR000269 Copper amine oxidase
12_434_1052(+)	Solyc07g066030.2.1	762	-76.57	Proteasome activator subunit 4-like (AHRD V1 **-- Q5Z876_ORYSJ); contains Interpro domain(s) IPR016024 Armadillo-type fold
12_434_1052(+)	Solyc01g109080.2.1	591	-57.01	Protein kinase (AHRD V1 *-*- D3AX52_POLPA); contains Interpro domain(s) IPR000403 Phosphatidylinositol 3- and 4-kinase, catalytic
12_434_1052(+)	Solyc04g073980.2.1	586	-57.02	Pumilio family protein (AHRD V1 *-*- D8U4V9_VOLCA); contains Interpro domain(s) IPR011989 Armadillo-like helical
12_434_1052(+)	Solyc09g011120.1.1	596	-70.79	Ramosa1 C2H2 zinc-finger transcription factor (AHRD V1 *-*- D0UTY8_ZEAMM); contains Interpro domain(s) IPR007087 Zinc finger, C2H2-type
12_434_1052(+)	Solyc06g071620.2.1	590	-53.98	Related to ATP dependent RNA helicase (AHRD V1 **-* Q6MV07_NEUCR); contains Interpro domain(s) IPR004179 Sec63 domain
12_434_1052(+)	Solyc07g053630.2.1	598	-72.05	Response regulator (AHRD V1 *--- A1A6A6_ORYSJ); contains Interpro domain(s) IPR006447 Myb-like DNA-binding region, SHAQKYF class
12_434_1052(+)	Solyc06g048960.2.1	732	-68.33	Ribonuclease 3-like protein 3 (AHRD V1 *-** RTL3_ORYSJ); contains Interpro domain(s) IPR000999 Ribonuclease III
12_434_1052(+)	Solyc08g075080.2.1	628	-79.94	Ring finger protein 12 (AHRD V1 *-*- Q4V889_RAT); contains Interpro domain(s) IPR018957 Zinc finger, C3HC4 RING-type
12_434_1052(+)	Solyc09g055260.2.1	596	-65.3	RING zinc finger-containing protein (AHRD V1 *--- D3BGF4_POLPA); contains Interpro domain(s) IPR016024 Armadillo-type fold
12_434_1052(+)	Solyc01g008910.2.1	747	-94.45	Scarecrow transcription factor family protein (AHRD V1 **-* D7MIP9_ARALY); contains Interpro domain(s) IPR005202 GRAS transcription factor
12_434_1052(+)	Solyc05g013850.2.1	1016	-86.7	Sieve element-occluding protein 3 (AHRD V1 **-- B5THF7_MEDTR)
12_434_1052(+)	Solyc01g096510.2.1	623	-72.01	Sigma factor binding protein 1 (AHRD V1 *-*- D1MWZ4_CITLA); contains Interpro domain(s) IPR008889 VQ
12_434_1052(+)	Solyc05g007420.1.1	739	-77.28	TCP family transcription factor (AHRD V1 *-*- A6MCZ2_9ORYZ); contains Interpro domain(s) IPR005333 Transcription factor, TCP
12_434_1052(+)	Solyc10g051030.1.1	628	-75.71	Ternary complex factor MIP1 (AHRD V1 **-- B6UE27_MAIZE); contains Interpro domain(s) IPR006869 Protein of unknown function DUF547
12_434_1052(+)	Solyc08g014600.2.1	606	-71.18	Thiopurine S-methyltransferase family protein expressed (AHRD V1 **** Q10AR3_ORYSJ); contains Interpro domain(s) IPR008854 Thiopurine S-methyltransferase
12_434_1052(+)	Solyc03g062650.2.1	580	-70.28	Thyroid adenoma-associated protein homolog (AHRD V1 *--- THADA_CANFA); contains Interpro domain(s) IPR019442 Protein of unknown function DUF2428, death-receptor-like
12_434_1052(+)	Solyc09g075830.2.1	897	-99.03	Time for coffee (AHRD V1 *--- D7L1P0_ARALY)
12_434_1052(+)	Solyc06g069460.1.1	613	-68.16	Transcription factor (Fragment) (AHRD V1 *-*- D6MK40_9ASPA); contains Interpro domain(s) IPR005333 Transcription factor, TCP
12_434_1052(+)	Solyc06g059750.2.1	614	-83.73	Transcriptional corepressor SEUSS (AHRD V1 *--- SEUSS_ARATH)
12_434_1052(+)	Solyc01g110040.2.1	565	-67.1	Transducin family protein (AHRD V1 ***- D7L1V6_ARALY)
12_434_1052(+)	Solyc09g009250.2.1	584	-56.35	Trihelix transcription factor (AHRD V1 **-* Q6Q6T0_ARATH); contains Interpro domain(s) IPR017877 MYB-like
12_434_1052(+)	Solyc06g017970.2.1	908	-112.93	Ubiquitin carboxyl-terminal hydrolase (Fragment) (AHRD V1 *--- D8UG84_VOLCA); contains Interpro domain(s) IPR002083 MATH
12_434_1052(+)	Solyc06g071120.2.1	595	-58.74	Ubiquitin carboxyl-terminal hydrolase family protein expressed (AHRD V1 *-*- Q10RB2_ORYSJ); contains Interpro domain(s) IPR006865 Protein of unknown function DUF629
12_434_1052(+)	Solyc10g084760.1.1	622	-70.62	Ubiquitin ligase E3 (Fragment) (AHRD V1 *-*- Q16LM2_AEDAE); contains Interpro domain(s) IPR013993 Zinc finger, N-recognin, metazoa
12_434_1052(+)	Solyc11g072160.1.1	612	-75.29	Ubiquitin-associated /TS-N domain-containing protein (AHRD V1 ***- D7LFE2_ARALY); contains Interpro domain(s) IPR009060 UBA-like
12_434_1052(+)	Solyc05g054080.2.1	622	-88.68	Ubiquitin-protein ligase E3 (AHRD V1 *-** B6K793_SCHJY); contains Interpro domain(s) IPR000569 HECT
12_434_1052(+)	Solyc01g104040.2.1	620	-81.25	UDP-glucose glycoprotein glucosyltransferase (AHRD V1 **** D7KYS8_ARALY); contains Interpro domain(s) IPR009448 UDP-glucose:Glycoprotein Glucosyltransferase
12_434_1052(+)	Solyc10g079330.1.1	595	-74.75	UDP-glucosyltransferase HvUGT5876 (AHRD V1 *-*- D3WYW1_HORVD); contains Interpro domain(s) IPR002213 UDP-glucuronosyl/UDP-glucosyltransferase
12_434_1052(+)	Solyc04g045370.1.1	585	-60.39	Ulp1 protease family C-terminal catalytic domain containing protein (AHRD V1 *-*- Q60D46_SOLDE); contains Interpro domain(s) IPR003653 Peptidase C48, SUMO/Sentrin/Ubl1
12_434_1052(+)	Solyc01g110700.2.1	12057	-1231.12	Unknown Protein (AHRD V1)
12_434_1052(+)	Solyc01g111180.2.1	11744	-1204.37	Unknown Protein (AHRD V1)
12_434_1052(+)	Solyc07g021720.1.1	1374	-182.33	Unknown Protein (AHRD V1)
12_434_1052(+)	Solyc10g006940.1.1	793	-98.27	Unknown Protein (AHRD V1)
12_434_1052(+)	Solyc04g039640.2.1	612	-70.13	Unknown Protein (AHRD V1)
12_434_1052(+)	Solyc01g060150.2.1	595	-61.77	Unknown Protein (AHRD V1)
12_434_1052(+)	Solyc03g080140.2.1	591	-57.47	Unknown Protein (AHRD V1)
12_434_1052(+)	Solyc08g059780.1.1	1883	-236.87	Unknown Protein (AHRD V1); contains Interpro domain(s) IPR001991 Sodium:dicarboxylate symporter
12_434_1052(+)	Solyc03g115810.2.1	582	-79.15	Vacuolar fusion protein mon1 (AHRD V1 ***- C5JTA2_AJEDS); contains Interpro domain(s) IPR004353 Vacuolar fusion protein MON1
12_434_1052(+)	Solyc09g009370.2.1	586	-59.33	Vacuolar protein sorting-associated protein (AHRD V1 *-*- Q2UJU9_ASPOR); contains Interpro domain(s) IPR009291 Protein of unknown function DUF946, plant
12_434_1052(+)	Solyc06g060470.1.1	595	-70.71	VQ motif family protein (AHRD V1 *-*- B6SZE5_MAIZE); contains Interpro domain(s) IPR008889 VQ
12_434_1052(+)	Solyc04g073950.1.1	612	-85.5	VQ motif family protein expressed (AHRD V1 *-*- Q10KE8_ORYSJ); contains Interpro domain(s) IPR008889 VQ
12_434_1052(+)	Solyc01g068070.2.1	598	-60.65	Wd-repeat protein (AHRD V1 *-*- C1FDE0_9CHLO); contains Interpro domain(s) IPR017986 WD40 repeat, region
12_434_1052(+)	Solyc02g076840.2.1	586	-72.41	Wiskott-Aldrich syndrome protein family member 2 (AHRD V1 *--- WASF2_MOUSE)
12_434_1052(+)	Solyc07g056280.2.1	609	-65.75	WRKY transcription factor 16 (AHRD V1 *-*- Q7X7E3_ORYSJ); contains Interpro domain(s) IPR003657 DNA-binding WRKY
12_434_1052(+)	Solyc12g011200.1.1	583	-63.8	WRKY transcription factor 29 (AHRD V1 ***- C9DI18_9ROSI); contains Interpro domain(s) IPR003657 DNA-binding WRKY
12_434_1052(+)	Solyc05g053380.2.1	621	-78.19	WRKY transcription factor 31 (AHRD V1 *-*- C9DI20_9ROSI); contains Interpro domain(s) IPR003657 DNA-binding WRKY
12_434_1052(+)	Solyc04g080130.2.1	598	-73.07	Zinc finger protein (AHRD V1 *-*- Q9LVQ7_ARATH); contains Interpro domain(s) IPR007087 Zinc finger, C2H2-type
12_434_1052(+)	Solyc04g008340.2.1	610	-61.81	Zinc transporter (AHRD V1 *-*- B0WKX7_CULQU); contains Interpro domain(s) IPR003689 Zinc/iron permease
12_434_1052(+)	Solyc02g067620.1.1	759	-72.62	Zinc transporter like 1 (AHRD V1 *-*- Q9JKN2_MOUSE); contains Interpro domain(s) IPR002524 Cation efflux protein
12_434_1092(-)	Solyc01g059980.2.1	590	-50.42	Beta-glucanase (AHRD V1 ***- Q53X08_NICPL); contains Interpro domain(s) IPR000490 Glycoside hydrolase, family 17
12_434_1092(-)	Solyc01g099100.2.1	601	-63.11	Long-chain-fatty-acid coa ligase (AHRD V1 ***- Q16WF9_AEDAE); contains Interpro domain(s) IPR000873 AMP-dependent synthetase and ligase
12_434_1092(-)	Solyc10g051110.1.1	572	-65.87	NAD dependent epimerase/dehydratase family protein (AHRD V1 *--- B0CAN3_ACAM1); contains Interpro domain(s) IPR016040 NAD(P)-binding domain
12_434_1092(-)	Solyc08g082750.2.1	578	-59.25	Nodule inception protein (Fragment) (AHRD V1 *-*- A9DM78_MEDTR); contains Interpro domain(s) IPR003035 Plant regulator RWP-RK
12_434_1092(-)	Solyc11g005670.1.1	1040	-118.02	Ubiquitin (AHRD V1 ***- Q2UZT4_MUSAC); contains Interpro domain(s) IPR019956 Ubiquitin subgroup
12_434_1092(-)	Solyc07g064130.1.1	938	-126.77	Ubiquitin (AHRD V1 ***- Q39257_PEA); contains Interpro domain(s) IPR019956 Ubiquitin subgroup
12_434_1092(-)	Solyc10g006480.1.1	892	-118.9	Ubiquitin (AHRD V1 ***- Q39257_PEA); contains Interpro domain(s) IPR019956 Ubiquitin subgroup
12_434_1092(-)	Solyc01g110700.2.1	3315	-333.21	Unknown Protein (AHRD V1)
12_434_1092(-)	Solyc01g111180.2.1	2293	-237.03	Unknown Protein (AHRD V1)
12_434_1155(-)	Solyc01g111180.2.1	1776	-243.71	Unknown Protein (AHRD V1)
12_434_1155(-)	Solyc01g110700.2.1	1485	-200.9	Unknown Protein (AHRD V1)
12_434_1155(-)	Solyc01g097080.1.1	1006	-124.32	Unknown Protein (AHRD V1)
12_434_1155(-)	Solyc10g054410.1.1	574	-82.08	Unknown Protein (AHRD V1)
12_434_1155(-)	Solyc07g021400.1.1	580	-84.49	Zinc finger family protein (AHRD V1 *--- D7LQC2_ARALY)
12_434_1176(-)	Solyc09g091660.2.1	601	-76.71	ABC transporter G family member 40 (AHRD V1 ***- AB40G_ARATH); contains Interpro domain(s) IPR013525 ABC-2 type transporter
12_434_1176(-)	Solyc01g059980.2.1	726	-70.36	Beta-glucanase (AHRD V1 ***- Q53X08_NICPL); contains Interpro domain(s) IPR000490 Glycoside hydrolase, family 17
12_434_1176(-)	Solyc08g016050.2.1	584	-65.87	Dedicator of cytokinesis family protein (AHRD V1 ***- A8P5S7_BRUMA); contains Interpro domain(s) IPR010703 Dedicator of cytokinesis
12_434_1176(-)	Solyc01g106220.2.1	609	-67.39	DNA polymerase V (AHRD V1 ***- A2Q1A6_MEDTR); contains Interpro domain(s) IPR007015 DNA polymerase V
12_434_1176(-)	Solyc01g106240.2.1	609	-67.39	DNA polymerase V (AHRD V1 ***- A2Q1A6_MEDTR); contains Interpro domain(s) IPR007015 DNA polymerase V
12_434_1176(-)	Solyc09g007330.2.1	578	-58.36	DNA replication licensing factor MCM6 (AHRD V1 **** B3LHP9_YEAS1); contains Interpro domain(s) IPR001208 DNA-dependent ATPase MCM
12_434_1176(-)	Solyc01g044480.2.1	576	-52.71	Elongation factor P (AHRD V1 ***- B6TAH3_MAIZE); contains Interpro domain(s) IPR008991 Translation protein SH3-like
12_434_1176(-)	Solyc05g008470.1.1	564	-57.52	F-box family protein (AHRD V1 *-*- D7KQH0_ARALY); contains Interpro domain(s) IPR006566 FBD-like
12_434_1176(-)	Solyc01g111080.2.1	593	-57.56	Gibberellin-regulated protein 2 (AHRD V1 *--- B6UGG6_MAIZE); contains Interpro domain(s) IPR003854 Gibberellin regulated protein
12_434_1176(-)	Solyc09g083350.2.1	584	-56.46	Group II intron splicing factor CRS1-like (AHRD V1 *--- Q5JK62_ORYSJ); contains Interpro domain(s) IPR001890 RNA-binding, CRM domain
12_434_1176(-)	Solyc03g006480.1.1	574	-56.07	Helicase sen1 (AHRD V1 *--- B6K1Y0_SCHJY); contains Interpro domain(s) IPR014016 Helicase, superfamily 1, UvrD-related
12_434_1176(-)	Solyc01g008120.2.1	611	-67.77	Histone acetyltransferase (AHRD V1 **** B9HG17_POPTR); contains Interpro domain(s) IPR009255 Transcriptional coactivation
12_434_1176(-)	Solyc07g052940.2.1	611	-64.25	Histone-lysine N-methyltransferase (AHRD V1 *-*- B6JWJ3_SCHJY); contains Interpro domain(s) IPR001214 SET
12_434_1176(-)	Solyc09g090340.1.1	585	-60.32	Peroxisomal membrane protein-like (AHRD V1 ***- Q6KA75_ORYSJ)
12_434_1176(-)	Solyc04g006970.2.1	744	-74.86	Phosphoenolpyruvate carboxylase (AHRD V1 **** A6YM33_RICCO); contains Interpro domain(s) IPR015813 Pyruvate/Phosphoenolpyruvate kinase, catalytic core
12_434_1176(-)	Solyc07g062530.2.1	603	-58.85	Phosphoenolpyruvate carboxylase 2 (AHRD V1 ***- Q9SCB2_SOLLC); contains Interpro domain(s) IPR015813 Pyruvate/Phosphoenolpyruvate kinase, catalytic core IPR001449 Phosphoenolpyruvate carboxylase
12_434_1176(-)	Solyc01g090860.2.1	588	-61.55	Poly(A) RNA polymerase protein 1 (AHRD V1 *--- TRF5_YEAST); contains Interpro domain(s) IPR002934 Nucleotidyltransferase
12_434_1176(-)	Solyc08g074680.2.1	868	-90.21	Polyphenol oxidase (AHRD V1 *-*- Q41428_SOLTU); contains Interpro domain(s) IPR002227 Tyrosinase
12_434_1176(-)	Solyc08g044400.1.1	596	-64.17	Polyphosphoinositide phosphatase (AHRD V1 *--* B6K225_SCHJY); contains Interpro domain(s) IPR001202 WW/Rsp5/WWP
12_434_1176(-)	Solyc09g092100.2.1	743	-88.09	Predicted CDS Pa_5_8110 (Fragment) (AHRD V1 *--- B2AKK2_PODAN); contains Interpro domain(s) IPR003594 ATP-binding region, ATPase-like
12_434_1176(-)	Solyc01g095810.2.1	586	-58.64	Ring H2 finger protein (AHRD V1 *-*- D9ZHD8_HYPPE); contains Interpro domain(s) IPR001841 Zinc finger, RING-type
12_434_1176(-)	Solyc04g049580.2.1	567	-54.16	Similarity the ORF shows strong similarity to EST 5419 - Aspergillus oryzae (AHRD V1 ***- A2Q8A7_ASPNC)
12_434_1176(-)	Solyc01g110040.2.1	721	-74.61	Transducin family protein (AHRD V1 ***- D7L1V6_ARALY)
12_434_1176(-)	Solyc10g006400.2.1	569	-53.52	Tryptophan synthase beta chain 1 (AHRD V1 **** Q0WUI8_ARATH); contains Interpro domain(s) IPR006654 Tryptophan synthase, beta chain
12_434_1176(-)	Solyc01g110700.2.1	6942	-705.2	Unknown Protein (AHRD V1)
12_434_1176(-)	Solyc01g111180.2.1	6510	-666.41	Unknown Protein (AHRD V1)
12_434_1176(-)	Solyc02g086460.2.1	871	-68.56	Unknown Protein (AHRD V1)
12_434_1176(-)	Solyc05g023660.1.1	845	-67.12	Unknown Protein (AHRD V1)
12_434_1176(-)	Solyc02g064600.2.1	752	-77.54	Unknown Protein (AHRD V1)
12_434_1176(-)	Solyc04g071660.2.1	737	-66.72	Unknown Protein (AHRD V1)
12_434_1176(-)	Solyc07g005970.2.1	581	-56.29	Unknown Protein (AHRD V1); contains Interpro domain(s) IPR019460 Autophagy-related protein 11
12_434_1176(-)	Solyc06g005080.2.1	570	-53.78	Vacuolar protein sorting-associated protein 18 (AHRD V1 ***- D0MR96_PHYIN); contains Interpro domain(s) IPR007810 Pep3/Vps18/deep orange
12_434_1176(-)	Solyc09g091020.2.1	581	-55.01	WD-repeat protein (AHRD V1 *--- Q7ND80_GLOVI); contains Interpro domain(s) IPR017986 WD40 repeat, region
12_85_97(-)	Solyc01g087560.2.1	594	-51.3	24-sterol C-methyltransferase (AHRD V1 **** Q2QDF7_GOSHI); contains Interpro domain(s) IPR013705 Sterol methyltransferase C-terminal
12_85_97(-)	Solyc07g052350.2.1	868	-58.31	3-isopropylmalate dehydratase large subunit (AHRD V1 *--- LEUC_NATPD); contains Interpro domain(s) IPR006249 Aconitase/iron regulatory protein 2
12_85_97(-)	Solyc01g110460.2.1	756	-67.37	3-oxo-5-alpha-steroid 4-dehydrogenase family protein (AHRD V1 **** D7M2L5_ARALY); contains Interpro domain(s) IPR001104 3-oxo-5-alpha-steroid 4-dehydrogenase, C-terminal
12_85_97(-)	Solyc01g068200.2.1	752	-68.8	Abscisic acid insensitive 8 homologue (Fragment) (AHRD V1 *--- A5A6Q3_TRIMO)
12_85_97(-)	Solyc02g085520.2.1	596	-54.46	Adenylosuccinate synthetase, chloroplastic (AHRD V1 **** PURA_SOLBU); contains Interpro domain(s) IPR001114 Adenylosuccinate synthetase
12_85_97(-)	Solyc09g074110.2.1	1379	-146.08	AGAP009276-PA (Fragment) (AHRD V1 *--- Q7PVH5_ANOGA)
12_85_97(-)	Solyc05g010050.2.1	1176	-78.44	Alpha/beta hydrolase fold-3 (AHRD V1 *--- Q1BFL1_MYCSS); contains Interpro domain(s) IPR002018 Carboxylesterase, type B
12_85_97(-)	Solyc06g059910.2.1	2556	-220.4	Alpha-humulene/(-)-(E)-beta-caryophyllene synthase (AHRD V1 **** HUMS_ARATH); contains Interpro domain(s) IPR005630 Terpene synthase, metal-binding domain
12_85_97(-)	Solyc08g067190.2.1	749	-63	Anaphase promoting complex subunit 5 (AHRD V1 ***- Q5SCA2_OSTTA)
12_85_97(-)	Solyc01g110440.2.1	908	-81	Arginine decarboxylase (AHRD V1 **** Q9SCF0_DATST); contains Interpro domain(s) IPR002985 Arginine decarboxylase
12_85_97(-)	Solyc10g005600.2.1	618	-55.71	At1g04390-like protein (Fragment) (AHRD V1 *-*- B0LQ22_ARALY); contains Interpro domain(s) IPR013069 BTB/POZ
12_85_97(-)	Solyc03g020020.2.1	742	-60.38	AT3G05680-like protein (Fragment) (AHRD V1 *-*- D6PPW0_9BRAS)
12_85_97(-)	Solyc01g091470.2.1	606	-56.24	AT-hook DNA-binding protein (Fragment) (AHRD V1 *--* A1DR81_CATRO); contains Interpro domain(s) IPR014476 Predicted AT-hook DNA-binding
12_85_97(-)	Solyc03g097670.2.1	587	-57.47	ATP binding protein (AHRD V1 **-- D7LS09_ARALY); contains Interpro domain(s) IPR003594 ATP-binding region, ATPase-like
12_85_97(-)	Solyc03g113070.2.1	1040	-82.6	ATP-binding cassette (ABC) transporter 17 (AHRD V1 *-*- Q4H493_RAT)
12_85_97(-)	Solyc01g106230.2.1	1755	-123.61	B3 domain-containing protein At5g60142 (AHRD V1 *-*- Y5142_ARATH); contains Interpro domain(s) IPR003340 Transcriptional factor B3
12_85_97(-)	Solyc04g076500.2.1	734	-62.95	BEACH domain-containing protein (AHRD V1 **-- D3BT75_POLPA); contains Interpro domain(s) IPR008985 Concanavalin A-like lectin/glucanase
12_85_97(-)	Solyc09g065700.2.1	1033	-77.17	Beige/BEACH domain containing protein (AHRD V1 *--- A8PYX1_BRUMA); contains Interpro domain(s) IPR000409 Beige/BEACH
12_85_97(-)	Solyc01g059980.2.1	1358	-119.3	Beta-glucanase (AHRD V1 ***- Q53X08_NICPL); contains Interpro domain(s) IPR000490 Glycoside hydrolase, family 17
12_85_97(-)	Solyc03g097260.2.1	731	-61.65	Bromodomain adjacent to zinc finger domain protein 1A (AHRD V1 *-*- BAZ1A_HUMAN); contains Interpro domain(s) IPR011011 Zinc finger, FYVE/PHD-type
12_85_97(-)	Solyc04g081210.2.1	605	-62.01	Calmodulin binding protein IQ (AHRD V1 *--* A8CF59_BRACM); contains Interpro domain(s) IPR000048 IQ calmodulin-binding region
12_85_97(-)	Solyc12g100360.1.1	601	-55.53	Calpain-like protein (AHRD V1 ***- Q8RVL2_ARATH); contains Interpro domain(s) IPR001300 Peptidase C2, calpain
12_85_97(-)	Solyc03g118490.2.1	627	-56.61	Cell division cycle associated 7 (AHRD V1 *-*- Q5M7M4_XENTR); contains Interpro domain(s) IPR018866 Cell division cycle-associated protein
12_85_97(-)	Solyc04g077470.2.1	610	-55.44	Cellulose synthase-like C1-2 glycosyltransferase family 2 protein (AHRD V1 **** D8T077_SELML); contains Interpro domain(s) IPR001173 Glycosyl transferase, family 2
12_85_97(-)	Solyc08g076320.2.1	719	-53.3	Cellulose synthase-like protein (AHRD V1 **** B9IPJ4_POPTR); contains Interpro domain(s) IPR005150 Cellulose synthase
12_85_97(-)	Solyc03g123560.2.1	600	-53.01	Chaperone protein dnaJ (AHRD V1 *-*- B4FBY1_MAIZE); contains Interpro domain(s) IPR015609 Molecular chaperone, heat shock protein, Hsp40, DnaJ
12_85_97(-)	Solyc04g082920.2.1	597	-57.53	Chlorophyll a-b binding protein, chloroplastic (AHRD V1 **** CB2_PHYPA); contains Interpro domain(s) IPR001344 Chlorophyll A-B binding protein
12_85_97(-)	Solyc06g060340.2.1	902	-66.91	Chloroplast photosystem II-associated protein (AHRD V1 ***- A8HPM2_CHLRE); contains Interpro domain(s) IPR001344 Chlorophyll A-B binding protein
12_85_97(-)	Solyc01g111370.2.1	1021	-88.6	Choline transporter like family (AHRD V1 *-*- C1FD31_9CHLO); contains Interpro domain(s) IPR007603 Protein of unknown function DUF580
12_85_97(-)	Solyc09g066480.2.1	580	-54.88	Chromodomain-helicase-DNA-binding protein 2 (AHRD V1 *--- CHD2_HUMAN); contains Interpro domain(s) IPR000330 SNF2-related
12_85_97(-)	Solyc01g067390.2.1	578	-51.9	Chromodomain-helicase-DNA-binding protein 2 (AHRD V1 *--* CHD2_HUMAN); contains Interpro domain(s) IPR000330 SNF2-related
12_85_97(-)	Solyc03g113000.2.1	605	-51.43	Chromosome structural maintenance protein-like (AHRD V1 **-- Q6YUW7_ORYSJ); contains Interpro domain(s) IPR007528 RINT-1/TIP-1
12_85_97(-)	Solyc03g007100.2.1	746	-70.22	Cleavage and polyadenylation specificity factor subunit A (AHRD V1 *--- C1H240_PARBA); contains Interpro domain(s) IPR004871 Cleavage and polyadenylation specificity factor, A subunit, C-terminal
12_85_97(-)	Solyc05g052620.2.1	1024	-80.21	Coronatine-insensitive 1 (Fragment) (AHRD V1 *--- Q5VJQ1_TOBAC)
12_85_97(-)	Solyc07g021120.1.1	589	-52.29	CST complex subunit CTC1 (AHRD V1 ***- CTC1_ARATH)
12_85_97(-)	Solyc12g062480.1.1	589	-52.29	CST complex subunit CTC1 (AHRD V1 ***- CTC1_ARATH)
12_85_97(-)	Solyc02g021470.2.1	604	-62.75	Cullin 4 (AHRD V1 ***- A9LK40_SOLLC); contains Interpro domain(s) IPR001373 Cullin, N-terminal
12_85_97(-)	Solyc01g096300.2.1	1004	-76.68	Cysteine-type endopeptidase/ ubiquitin thiolesterase (AHRD V1 **-- B6TDL6_MAIZE)
12_85_97(-)	Solyc08g016050.2.1	854	-54.88	Dedicator of cytokinesis family protein (AHRD V1 ***- A8P5S7_BRUMA); contains Interpro domain(s) IPR010703 Dedicator of cytokinesis
12_85_97(-)	Solyc03g110880.2.1	602	-58.41	DNA-directed RNA polymerase (AHRD V1 ***- B9IL57_POPTR); contains Interpro domain(s) IPR015712 DNA-directed RNA polymerase, subunit 2
12_85_97(-)	Solyc02g089260.2.1	865	-70.2	E3 ubiquitin-protein ligase UBR4 (AHRD V1 *--- UBR4_HUMAN); contains Interpro domain(s) IPR013993 Zinc finger, N-recognin, metazoa
12_85_97(-)	Solyc08g077700.2.1	591	-53.71	Eukaryotic translation initiation factor 4 gamma 1 (AHRD V1 *-*- A9QXE6_MESAU); contains Interpro domain(s) IPR016021 MIF4-like, type 1/2/3
12_85_97(-)	Solyc03g063750.2.1	588	-53.27	Exostosin-like glycosyltransferase (AHRD V1 **-- A8J984_CHLRE); contains Interpro domain(s) IPR004263 Exostosin-like
12_85_97(-)	Solyc02g085870.2.1	609	-50.06	Fatty acid elongase 3-ketoacyl-CoA synthase (AHRD V1 **** Q6DUV5_BRANA); contains Interpro domain(s) IPR012392 Very-long-chain 3-ketoacyl-CoA synthase
12_85_97(-)	Solyc09g042740.2.1	727	-57.98	Formin 3 (AHRD V1 *-*- D0QAN4_ARATH); contains Interpro domain(s) IPR015425 Actin-binding FH2
12_85_97(-)	Solyc01g106380.2.1	612	-52.95	Genomic DNA chromosome 5 BAC clone T12B11 (AHRD V1 ***- Q9FGE8_ARATH)
12_85_97(-)	Solyc02g014190.2.1	727	-60.49	Genomic DNA chromosome 5 P1 clone MYJ24 (AHRD V1 **-- Q9FN44_ARATH); contains Interpro domain(s) IPR003594 ATP-binding region, ATPase-like
12_85_97(-)	Solyc01g111080.2.1	905	-72.64	Gibberellin-regulated protein 2 (AHRD V1 *--- B6UGG6_MAIZE); contains Interpro domain(s) IPR003854 Gibberellin regulated protein
12_85_97(-)	Solyc06g008870.2.1	755	-66.45	GID1-like gibberellin receptor (AHRD V1 **-- A7MAQ4_HORVU); contains Interpro domain(s) IPR013094 Alpha/beta hydrolase fold-3
12_85_97(-)	Solyc01g101120.2.1	619	-57.81	Glucan endo-1 3-beta-glucosidase 1 (AHRD V1 *-*- B4FGE4_MAIZE); contains Interpro domain(s) IPR012946 X8
12_85_97(-)	Solyc02g078230.1.1	761	-70.47	Glucan synthase like 1 (AHRD V1 ***- D8R536_SELML); contains Interpro domain(s) IPR003440 Glycosyl transferase, family 48
12_85_97(-)	Solyc03g112870.2.1	742	-56.08	Glucose-6P/phosphate translocator (AHRD V1 **** Q9MSB4_MESCR); contains Interpro domain(s) IPR004696 Tpt phosphate/phosphoenolpyruvate translocator
12_85_97(-)	Solyc08g065360.2.1	591	-51.3	Glutathione-regulated potassium-efflux system protein (AHRD V1 *-** Q8TJ09_METAC); contains Interpro domain(s) IPR006153 Cation/H+ exchanger
12_85_97(-)	Solyc07g026670.2.1	606	-50.65	Glutathione-regulated potassium-efflux system protein (AHRD V1 **** Q46EP4_METBF); contains Interpro domain(s) IPR006153 Cation/H+ exchanger
12_85_97(-)	Solyc02g071040.2.1	627	-54.74	Glycogen synthase (AHRD V1 *-*- D1R4V0_9CHLA); contains Interpro domain(s) IPR011835 Glycogen/starch synthases, ADP-glucose type
12_85_97(-)	Solyc05g055040.2.1	584	-53.02	Glycogenin-like protein (AHRD V1 *-*- Q5NA53_ORYSJ); contains Interpro domain(s) IPR002495 Glycosyl transferase, family 8
12_85_97(-)	Solyc04g078980.2.1	752	-64.24	Glycogenin-like protein (AHRD V1 ***- Q5NA53_ORYSJ); contains Interpro domain(s) IPR002495 Glycosyl transferase, family 8
12_85_97(-)	Solyc04g079900.2.1	609	-53.6	GP63 leishmanolysin (Metallo-peptidase clan ma(M) family m8) (AHRD V1 *--- A4H637_LEIBR); contains Interpro domain(s) IPR001577 Peptidase M8, leishmanolysin
12_85_97(-)	Solyc02g093770.2.1	758	-72.02	GPI inositol-deacylase (AHRD V1 *-*- C5FP83_NANOT); contains Interpro domain(s) IPR012908 PGAP1-like
12_85_97(-)	Solyc02g085810.2.1	644	-68.16	HEAT repeat containing 5B (AHRD V1 *--- B9EK47_HUMAN); contains Interpro domain(s) IPR011989 Armadillo-like helical
12_85_97(-)	Solyc02g077660.2.1	757	-67.77	Homeobox protein EgHBX4 (Fragment) (AHRD V1 *--- HBX4_ECHGR); contains Interpro domain(s) IPR018500 DDT subgroup
12_85_97(-)	Solyc08g007240.2.1	716	-54.51	Hydrolase NUDIX family protein (AHRD V1 **-- Q2A9R5_BRAOL); contains Interpro domain(s) IPR000086 NUDIX hydrolase domain
12_85_97(-)	Solyc04g007870.2.1	861	-70.46	IFA-binding protein (AHRD V1 *--- Q9ZTZ4_ARATH); contains Interpro domain(s) IPR007656 Protein of unknown function DUF593
12_85_97(-)	Solyc01g094110.2.1	601	-51.9	Legumin 11S-globulin (AHRD V1 **-- Q39770_GINBI); contains Interpro domain(s) IPR011051 Cupin, RmlC-type
12_85_97(-)	Solyc04g079280.2.1	883	-67.22	LipA and NB-ARC domain protein (AHRD V1 *--- B8NDK8_ASPFN); contains Interpro domain(s) IPR016024 Armadillo-type fold
12_85_97(-)	Solyc12g100020.1.1	575	-52.39	LRR receptor-like serine/threonine-protein kinase, RLP
12_85_97(-)	Solyc10g008740.2.1	642	-57.61	Magnesium chelatase ATPase subunit I (AHRD V1 **** Q53RM0_ORYSJ); contains Interpro domain(s) IPR011775 Magnesium chelatase, ATPase subunit I
12_85_97(-)	Solyc12g044820.1.1	716	-53.72	Multidrug resistance protein ABC transporter family (AHRD V1 ***- B9GX56_POPTR); contains Interpro domain(s) IPR003439 ABC transporter-like
12_85_97(-)	Solyc05g014380.2.1	885	-63.26	Multidrug resistance protein ABC transporter family (AHRD V1 ***- B9HTC0_POPTR); contains Interpro domain(s) IPR001140 ABC transporter, transmembrane region
12_85_97(-)	Solyc04g009790.2.1	737	-69.6	Multidrug resistance protein mdtK (AHRD V1 *-*- MDTK_ENT38); contains Interpro domain(s) IPR015521 MATE family transporter related protein
12_85_97(-)	Solyc12g042680.1.1	597	-50.43	Mutator-like transposase (AHRD V1 *--- Q94HK4_ORYSA); contains Interpro domain(s) IPR004332 Transposase, MuDR, plant
12_85_97(-)	Solyc10g006820.2.1	608	-52.33	Myosin (AHRD V1 ***- Q9SNF0_ARATH); contains Interpro domain(s) IPR001609 Myosin head, motor region
12_85_97(-)	Solyc01g090670.2.1	912	-75.56	Nuclear pore glycoprotein p62 (AHRD V1 *--- C0HBQ2_SALSA); contains Interpro domain(s) IPR007758 Nucleoporin, Nsp1-like, C-terminal
12_85_97(-)	Solyc06g071330.2.1	877	-72.22	Nucleobase ascorbate transporter (AHRD V1 **-* B9I369_POPTR); contains Interpro domain(s) IPR006043 Xanthine/uracil/vitamin C permease
12_85_97(-)	Solyc02g081680.2.1	586	-54.45	Nucleolar complex protein 2 homolog (AHRD V1 ***- C0H9R3_SALSA); contains Interpro domain(s) IPR005343 Uncharacterised protein family UPF0120
12_85_97(-)	Solyc02g065500.2.1	1214	-112.22	Nucleolar pre-ribosomal-associated protein 1 (AHRD V1 *--- NPA1P_HUMAN)
12_85_97(-)	Solyc02g085230.2.1	728	-55.15	Nucleolar protein 6 (AHRD V1 ***- B0WP83_CULQU); contains Interpro domain(s) IPR005554 Nrap protein
12_85_97(-)	Solyc01g102540.2.1	876	-80.67	Nucleoporin (AHRD V1 *-*- C0KG86_DROSI)
12_85_97(-)	Solyc08g083060.2.1	603	-54.64	Oligopeptide transporter (Fragment) (AHRD V1 **** B0DAK3_LACBS); contains Interpro domain(s) IPR004813 Oligopeptide transporter OPT superfamily
12_85_97(-)	Solyc01g105990.2.1	777	-55.71	Os01g0107900 protein (Fragment) (AHRD V1 *-*- Q0JRC9_ORYSJ)
12_85_97(-)	Solyc05g009120.2.1	747	-54.85	Os03g0731050 protein (Fragment) (AHRD V1 ***- C7IZG5_ORYSJ); contains Interpro domain(s) IPR004949 Protein of unknown function DUF266, plant
12_85_97(-)	Solyc10g008210.2.1	743	-96.76	Os07g0507200 protein (Fragment) (AHRD V1 *-*- C7J530_ORYSJ); contains Interpro domain(s) IPR009675 Targeting for Xklp2
12_85_97(-)	Solyc10g074940.1.1	599	-57.76	Phospholipid-transporting ATPase (AHRD V1 **** B6JZB6_SCHJY); contains Interpro domain(s) IPR006539 ATPase, P-type, phospholipid-translocating, flippase
12_85_97(-)	Solyc05g006640.2.1	597	-57.11	Phospholipid-transporting ATPase (AHRD V1 **** C1GDL1_PARBD); contains Interpro domain(s) IPR006539 ATPase, P-type, phospholipid-translocating, flippase
12_85_97(-)	Solyc03g094080.2.1	890	-72.3	Polyadenylate-binding protein family protein (AHRD V1 **** D7MT99_ARALY); contains Interpro domain(s) IPR000504 RNA recognition motif, RNP-1
12_85_97(-)	Solyc08g074680.2.1	613	-60.97	Polyphenol oxidase (AHRD V1 *-*- Q41428_SOLTU); contains Interpro domain(s) IPR002227 Tyrosinase
12_85_97(-)	Solyc08g044400.1.1	751	-75.78	Polyphosphoinositide phosphatase (AHRD V1 *--* B6K225_SCHJY); contains Interpro domain(s) IPR001202 WW/Rsp5/WWP
12_85_97(-)	Solyc01g105150.2.1	747	-76.72	Potassium transporter family protein (AHRD V1 ***- D7KXB7_ARALY); contains Interpro domain(s) IPR003855 K+ potassium transporter
12_85_97(-)	Solyc10g047270.1.1	610	-57.87	Potassium transporter family protein (AHRD V1 **** D7KXB7_ARALY); contains Interpro domain(s) IPR003855 K+ potassium transporter
12_85_97(-)	Solyc06g068230.2.1	598	-60.37	Protein TIF31 homolog (AHRD V1 *--- TIF31_NEUCR); contains Interpro domain(s) IPR011990 Tetratricopeptide-like helical
12_85_97(-)	Solyc01g086750.2.1	599	-56.97	Protein TIF31 homolog (AHRD V1 ***- TIF31_COCIM); contains Interpro domain(s) IPR011990 Tetratricopeptide-like helical
12_85_97(-)	Solyc05g017860.2.1	601	-52.81	Protein VAC14 homolog (AHRD V1 **-- VAC14_XENLA); contains Interpro domain(s) IPR011989 Armadillo-like helical
12_85_97(-)	Solyc01g008770.2.1	597	-56.95	Rho GTPase activating protein 12 (AHRD V1 *--* Q6P4P5_DANRE); contains Interpro domain(s) IPR000198 RhoGAP
12_85_97(-)	Solyc04g014760.2.1	746	-61.71	RHO protein GDP dissociation inhibitor (AHRD V1 **** Q705X3_MEDTR); contains Interpro domain(s) IPR000406 RHO protein GDP dissociation inhibitor
12_85_97(-)	Solyc06g071210.2.1	916	-70.33	Ribosomal protein S6 kinase 2 alpha (AHRD V1 **** KS6AA_CHICK); contains Interpro domain(s) IPR002290 Serine/threonine protein kinase
12_85_97(-)	Solyc12g015710.1.1	607	-59.49	Ribosomal RNA small subunit methyltransferase B (AHRD V1 ***- D5H7I5_SALRM); contains Interpro domain(s) IPR001678 Bacterial Fmu (Sun)/eukaryotic nucleolar NOL1/Nop2p
12_85_97(-)	Solyc03g118840.2.1	763	-56.42	RING-finger protein like (AHRD V1 *-*- B6SVN2_MAIZE); contains Interpro domain(s) IPR018957 Zinc finger, C3HC4 RING-type
12_85_97(-)	Solyc04g049580.2.1	884	-60.57	Similarity the ORF shows strong similarity to EST 5419 - Aspergillus oryzae (AHRD V1 ***- A2Q8A7_ASPNC)
12_85_97(-)	Solyc01g106940.2.1	1176	-78.1	Single myb histone 4 (Fragment) (AHRD V1 *--- A6MZD9_ORYSI); contains Interpro domain(s) IPR005818 Histone H1/H5
12_85_97(-)	Solyc11g012770.1.1	861	-62.45	Sister chromatid cohesion protein PDS5 homolog B (AHRD V1 **-- PDS5B_HUMAN); contains Interpro domain(s) IPR016024 Armadillo-type fold
12_85_97(-)	Solyc09g098450.2.1	593	-50.46	Sn1-specific diacylglycerol lipase alpha (AHRD V1 *-*- B0X8K9_CULQU); contains Interpro domain(s) IPR002921 Lipase, class 3
12_85_97(-)	Solyc07g042000.2.1	746	-59.15	Sodium/calcium exchanger protein (AHRD V1 *-** B6K816_SCHJY); contains Interpro domain(s) IPR004837 Sodium/calcium exchanger membrane region
12_85_97(-)	Solyc04g082700.2.1	607	-61.17	Solute carrier family 2, facilitated glucose transporter member 12 (AHRD V1 *-*- GTR12_MOUSE); contains Interpro domain(s) IPR016196 Major facilitator superfamily, general substrate transporter
12_85_97(-)	Solyc05g015510.2.1	917	-83.42	Squamosa promoter-binding-like protein 11 (AHRD V1 ***- B6TF72_MAIZE); contains Interpro domain(s) IPR004333 Transcription factor, SBP-box
12_85_97(-)	Solyc06g071430.2.1	752	-56.46	T17H3.1 protein (Fragment) (AHRD V1 ***- Q9SXD0_ARATH)
12_85_97(-)	Solyc05g012640.2.1	583	-51.79	T7.1 protein (AHRD V1 *-*- Q9FZE6_ARATH); contains Interpro domain(s) IPR008581 Protein of unknown function DUF863, plant
12_85_97(-)	Solyc05g017890.2.1	585	-51.99	THO complex subunit 2 (AHRD V1 *-*- B0XJB9_CULQU)
12_85_97(-)	Solyc03g062650.2.1	599	-52.23	Thyroid adenoma-associated protein homolog (AHRD V1 *--- THADA_CANFA); contains Interpro domain(s) IPR019442 Protein of unknown function DUF2428, death-receptor-like
12_85_97(-)	Solyc03g007800.2.1	569	-51.02	Topoisomerase 1-associated factor 1 (AHRD V1 *--- C9S978_VERA1); contains Interpro domain(s) IPR007725 Timeless C-terminal
12_85_97(-)	Solyc01g110040.2.1	1132	-76.89	Transducin family protein (AHRD V1 ***- D7L1V6_ARALY)
12_85_97(-)	Solyc04g050520.2.1	585	-54.08	Translational activator gcn1 (AHRD V1 **-- Q177C0_AEDAE); contains Interpro domain(s) IPR011989 Armadillo-like helical
12_85_97(-)	Solyc07g053970.2.1	756	-61.58	Two-pore calcium channel 2 (AHRD V1 **** B8PXJ9_STRPU); contains Interpro domain(s) IPR005821 Ion transport
12_85_97(-)	Solyc02g085030.2.1	598	-52.69	UBA/TS-N domain protein (AHRD V1 *--- B8NTJ3_ASPFN); contains Interpro domain(s) IPR001623 Heat shock protein DnaJ, N-terminal
12_85_97(-)	Solyc10g084760.1.1	736	-68.76	Ubiquitin ligase E3 (Fragment) (AHRD V1 *-*- Q16LM2_AEDAE); contains Interpro domain(s) IPR013993 Zinc finger, N-recognin, metazoa
12_85_97(-)	Solyc07g065630.2.1	1307	-126.03	Ubiquitin-protein ligase 1 (AHRD V1 **** D7KN29_ARALY); contains Interpro domain(s) IPR000569 HECT
12_85_97(-)	Solyc05g054080.2.1	611	-65.3	Ubiquitin-protein ligase E3 (AHRD V1 *-** B6K793_SCHJY); contains Interpro domain(s) IPR000569 HECT
12_85_97(-)	Solyc01g110700.2.1	16259	-1178.55	Unknown Protein (AHRD V1)
12_85_97(-)	Solyc01g111180.2.1	14441	-1050.93	Unknown Protein (AHRD V1)
12_85_97(-)	Solyc01g060150.2.1	1022	-81.06	Unknown Protein (AHRD V1)
12_85_97(-)	Solyc06g030500.1.1	632	-65.49	Unknown Protein (AHRD V1)
12_85_97(-)	Solyc05g021170.1.1	611	-56.11	Unknown Protein (AHRD V1)
12_85_97(-)	Solyc08g078840.2.1	593	-53.42	Unknown Protein (AHRD V1)
12_85_97(-)	Solyc12g063000.1.1	1339	-142.03	Unknown Protein (AHRD V1); contains Interpro domain(s) IPR001463 Sodium:alanine symporter
12_85_97(-)	Solyc12g062970.1.1	727	-67.98	Unknown Protein (AHRD V1); contains Interpro domain(s) IPR002956 Bride of sevenless protein
12_85_97(-)	Solyc02g082140.2.1	783	-71.07	Unknown Protein (AHRD V1); contains Interpro domain(s) IPR008166 Protein of unknown function DUF23
12_85_97(-)	Solyc09g009370.2.1	737	-67.73	Vacuolar protein sorting-associated protein (AHRD V1 *-*- Q2UJU9_ASPOR); contains Interpro domain(s) IPR009291 Protein of unknown function DUF946, plant
12_85_97(-)	Solyc09g031750.2.1	640	-64.96	Vesicular glutamate transporter (AHRD V1 **-* B3A011_9PULM); contains Interpro domain(s) IPR016196 Major facilitator superfamily, general substrate transporter
12_85_97(-)	Solyc02g094060.2.1	1035	-82.77	Voltage-gated chloride channel (AHRD V1 **** Q96325_ARATH); contains Interpro domain(s) IPR002251 Chloride channel plant CLC
12_85_97(-)	Solyc02g088220.2.1	606	-50.36	Xenotropic and polytropic retrovirus receptor (AHRD V1 **-* B2GU54_XENTR); contains Interpro domain(s) IPR004342 EXS, C-terminal
12_85_97(-)	Solyc01g079970.2.1	605	-53.08	Xylanase inhibitor (Fragment) (AHRD V1 **-- Q53IQ3_WHEAT); contains Interpro domain(s) IPR001461 Peptidase A1
12_85_97(-)	Solyc03g006350.2.1	601	-50.52	Zinc finger CCCH domain-containing protein 27 (AHRD V1 *-*- C3H27_ARATH); contains Interpro domain(s) IPR000571 Zinc finger, CCCH-type
12_98_449(+)	Solyc01g110460.2.1	594	-58.38	3-oxo-5-alpha-steroid 4-dehydrogenase family protein (AHRD V1 **** D7M2L5_ARALY); contains Interpro domain(s) IPR001104 3-oxo-5-alpha-steroid 4-dehydrogenase, C-terminal
12_98_449(+)	Solyc09g008000.2.1	744	-58.46	ABC transporter G family member 28 (AHRD V1 **** AB28G_ARATH); contains Interpro domain(s) IPR003439 ABC transporter-like
12_98_449(+)	Solyc06g059910.2.1	1172	-70.22	Alpha-humulene/(-)-(E)-beta-caryophyllene synthase (AHRD V1 **** HUMS_ARATH); contains Interpro domain(s) IPR005630 Terpene synthase, metal-binding domain
12_98_449(+)	Solyc03g113740.2.1	596	-51.76	Anaphase promoting complex subunit 8/cell division cycle protein 23-like protein (Fragment) (AHRD V1 **-- Q5SC97_OSTTA); contains Interpro domain(s) IPR007192 Cdc23
12_98_449(+)	Solyc06g072300.2.1	735	-51.43	ARGONAUTE 1 (AHRD V1 ***- D6RUV9_TOBAC); contains Interpro domain(s) IPR003165 Stem cell self-renewal protein Piwi
12_98_449(+)	Solyc01g059980.2.1	1302	-82.48	Beta-glucanase (AHRD V1 ***- Q53X08_NICPL); contains Interpro domain(s) IPR000490 Glycoside hydrolase, family 17
12_98_449(+)	Solyc06g008230.2.1	726	-67.09	Calmodulin-binding protein (AHRD V1 **-* Q7XJB9_ORYSI); contains Interpro domain(s) IPR011990 Tetratricopeptide-like helical
12_98_449(+)	Solyc04g082340.2.1	604	-54.82	Carboxypeptidase B (AHRD V1 *-*- D3PJJ8_9MAXI); contains Interpro domain(s) IPR000834 Peptidase M14, carboxypeptidase A
12_98_449(+)	Solyc03g110880.2.1	580	-51.55	DNA-directed RNA polymerase (AHRD V1 ***- B9IL57_POPTR); contains Interpro domain(s) IPR015712 DNA-directed RNA polymerase, subunit 2
12_98_449(+)	Solyc01g044480.2.1	867	-71.36	Elongation factor P (AHRD V1 ***- B6TAH3_MAIZE); contains Interpro domain(s) IPR008991 Translation protein SH3-like
12_98_449(+)	Solyc09g091900.2.1	751	-61.84	ER lumen protein retaining receptor (AHRD V1 ***- D7PF42_NICBE); contains Interpro domain(s) IPR000133 ER lumen protein retaining receptor
12_98_449(+)	Solyc02g014190.2.1	573	-57.47	Genomic DNA chromosome 5 P1 clone MYJ24 (AHRD V1 **-- Q9FN44_ARATH); contains Interpro domain(s) IPR003594 ATP-binding region, ATPase-like
12_98_449(+)	Solyc01g098390.2.1	594	-53.89	GID1-like gibberellin receptor (AHRD V1 **-- A7MAQ4_HORVU); contains Interpro domain(s) IPR013094 Alpha/beta hydrolase fold-3
12_98_449(+)	Solyc03g114810.2.1	753	-59.41	Glycosyltransferase (AHRD V1 ***- B9N4D7_POPTR); contains Interpro domain(s) IPR002495 Glycosyl transferase, family 8
12_98_449(+)	Solyc06g043370.1.1	866	-59.03	HGWP repeat containing protein-like (AHRD V1 *--- Q5ZAQ6_ORYSJ)
12_98_449(+)	Solyc04g072260.1.1	859	-76.09	Midasin (AHRD V1 ***- B9MXW7_POPTR); contains Interpro domain(s) IPR012099 Midasin
12_98_449(+)	Solyc07g065320.2.1	614	-50.54	Multidrug resistance protein ABC transporter family (AHRD V1 **-- B9GJX7_POPTR); contains Interpro domain(s) IPR001140 ABC transporter, transmembrane region
12_98_449(+)	Solyc01g080640.2.1	890	-71.16	Multidrug resistance protein ABC transporter family (AHRD V1 **-- B9GS96_POPTR); contains Interpro domain(s) IPR001140 ABC transporter, transmembrane region
12_98_449(+)	Solyc03g117540.2.1	716	-51	Multidrug resistance protein ABC transporter family (AHRD V1 **-- B9I191_POPTR); contains Interpro domain(s) IPR001140 ABC transporter, transmembrane region
12_98_449(+)	Solyc03g082680.2.1	623	-51.65	Neuroblastoma-amplified protein-like protein (AHRD V1 *-*- D2V0U7_NAEGR); contains Interpro domain(s) IPR011046 WD40 repeat-like
12_98_449(+)	Solyc03g082700.2.1	746	-57.45	Oligopeptide transporter 9 (AHRD V1 **** B6SVF4_MAIZE); contains Interpro domain(s) IPR004648 Tetrapeptide transporter, OPT1/isp4
12_98_449(+)	Solyc04g014880.2.1	605	-52.16	Outward rectifying potassium channel (AHRD V1 **** B9IH25_POPTR); contains Interpro domain(s) IPR013099 Ion transport 2
12_98_449(+)	Solyc04g049580.2.1	725	-54.63	Similarity the ORF shows strong similarity to EST 5419 - Aspergillus oryzae (AHRD V1 ***- A2Q8A7_ASPNC)
12_98_449(+)	Solyc09g072690.1.1	1035	-59.75	Sodium/calcium exchanger protein (Fragment) (AHRD V1 *-** A3GGW1_PICST); contains Interpro domain(s) IPR004837 Sodium/calcium exchanger membrane region
12_98_449(+)	Solyc01g110040.2.1	741	-67.68	Transducin family protein (AHRD V1 ***- D7L1V6_ARALY)
12_98_449(+)	Solyc03g093480.2.1	1029	-87.33	U3 small nucleolar RNA-associated protein 10 (AHRD V1 *--- C8VGG5_EMENI); contains Interpro domain(s) IPR012954 BP28, C-terminal
12_98_449(+)	Solyc05g032790.1.1	867	-65.4	Ubiquitin (AHRD V1 *-*- A2Q1T1_MEDTR)
12_98_449(+)	Solyc07g065630.2.1	768	-53.47	Ubiquitin-protein ligase 1 (AHRD V1 **** D7KN29_ARALY); contains Interpro domain(s) IPR000569 HECT
12_98_449(+)	Solyc01g110700.2.1	7586	-537.61	Unknown Protein (AHRD V1)
12_98_449(+)	Solyc01g111180.2.1	6706	-472.06	Unknown Protein (AHRD V1)
12_98_449(+)	Solyc01g058090.1.1	1067	-94.69	Unknown Protein (AHRD V1)
12_98_449(+)	Solyc11g045650.1.1	1009	-76.79	Unknown Protein (AHRD V1)
12_98_449(+)	Solyc04g028420.1.1	615	-54.17	Unknown Protein (AHRD V1)
12_98_449(+)	Solyc08g029040.1.1	606	-54.51	Unknown Protein (AHRD V1)
12_98_449(+)	Solyc10g044660.1.1	754	-69.79	Unknown Protein (AHRD V1); contains Interpro domain(s) IPR000245 ATPase, V0 complex, proteolipid subunit C
12_98_449(+)	Solyc06g009990.1.1	1514	-142.81	Unknown Protein (AHRD V1); contains Interpro domain(s) IPR000366 Fungal pheromone mating factor STE2 GPCR
12_98_449(+)	Solyc12g062960.1.1	2675	-242.63	Unknown Protein (AHRD V1); contains Interpro domain(s) IPR000434 Polycystic kidney disease type 1 protein
12_98_449(+)	Solyc12g062990.1.1	5003	-423.24	Unknown Protein (AHRD V1); contains Interpro domain(s) IPR000515 Binding-protein-dependent transport systems inner membrane component
12_98_449(+)	Solyc09g015570.1.1	1445	-134.66	Unknown Protein (AHRD V1); contains Interpro domain(s) IPR000515 Binding-protein-dependent transport systems inner membrane component
12_98_449(+)	Solyc12g063000.1.1	5702	-489.35	Unknown Protein (AHRD V1); contains Interpro domain(s) IPR001463 Sodium:alanine symporter
12_98_449(+)	Solyc01g034180.1.1	2674	-240.96	Unknown Protein (AHRD V1); contains Interpro domain(s) IPR001463 Sodium:alanine symporter
12_98_449(+)	Solyc12g062950.1.1	2078	-174.32	Unknown Protein (AHRD V1); contains Interpro domain(s) IPR001463 Sodium:alanine symporter
12_98_449(+)	Solyc01g034220.1.1	1806	-177.85	Unknown Protein (AHRD V1); contains Interpro domain(s) IPR001463 Sodium:alanine symporter
[truncated: 2,573 more rows]

## Sheet: Table S8
Table S8 The expression patterns of phasiRNAs targets
phasiRNA ID	target genes	target genes descripition	c1d_count	c1d_FPKM	a1d_count	a1d_FPKM
1_1364_186(+),1_1364_205(-),1_1364_226(-),1_1364_249(+),1_276_220(+),1_276_577(+),1_276_724(+),1_3182_143(+),1_3183_303(+),1_3183_324(+),1_541_113(-),1_541_115(+),1_541_134(-),1_541_136(+),1_541_155(-),1_541_178(+),1_541_197(-),1_541_239(-),1_541_470(-),1_541_619(+),1_541_94(+),10_1305_229(+),10_1305_271(+),10_1305_332(-),10_1305_395(-),10_1305_418(+),10_1305_481(+),11_127_91(+),11_131_361(+),11_…	Solyc01g110700.2.1	Unknown Protein (AHRD V1)	1582.21	0.18	812.16	0.1
1_1364_186(+),1_1364_205(-),1_1364_226(-),1_1364_249(+),1_276_220(+),1_276_577(+),1_3182_143(+),1_3183_303(+),1_3183_324(+),1_541_113(-),1_541_115(+),1_541_134(-),1_541_136(+),1_541_155(-),1_541_178(+),1_541_197(-),1_541_239(-),1_541_470(-),1_541_619(+),1_541_94(+),10_1305_229(+),10_1305_271(+),10_1305_332(-),10_1305_395(-),10_1305_418(+),10_1305_481(+),11_127_91(+),11_131_361(+),11_142_4505(+),1…	Solyc01g111180.2.1	Unknown Protein (AHRD V1)	13516.9	1.62	13307.8	1.72
1_1364_186(+),11_874_79(-),8_2337_616(+),9_1348_8105(-)	Solyc03g013530.1.1	Unknown Protein (AHRD V1)	0	0	0	0
1_1364_186(+),8_2337_616(+),9_1348_8105(-)	Solyc02g084270.1.1	Unknown Protein (AHRD V1)	0	0	0	0
1_1364_205(-),1_1364_226(-)	Solyc03g117550.1.1	Receptor protein kinase-like (AHRD V1 *-*- Q5JN26_ORYSJ); contains Interpro domain(s) IPR002290 Serine/threonine protein kinase	233.43	2.84	222.21	2.91
1_1364_205(-),1_1364_226(-)	Solyc05g053890.1.1	Glucosyltransferase-like protein (AHRD V1 *-** Q9LXV0_ARATH); contains Interpro domain(s) IPR002213 UDP-glucuronosyl/UDP-glucosyltransferase	713.43	10.86	621.19	10.2
1_1364_205(-),1_1364_226(-)	Solyc07g049720.2.1	DNA topoisomerase I (AHRD V1 **** Q9XGL1_DAUCA); contains Interpro domain(s) IPR013499 DNA topoisomerase I, C-terminal, eukaryotic-type	2343.14	12.89	2628.32	15.59
1_1364_205(-),1_1364_226(-)	Solyc07g053790.1.1	Targeting protein for Xklp2 containing protein expressed (AHRD V1 *--- Q10Q22_ORYSJ); contains Interpro domain(s) IPR009675 Targeting for Xklp2	83.87	0.93	95.11	1.14
1_1364_205(-),1_1364_226(-)	Solyc07g066200.2.1	Genomic DNA chromosome 5 TAC clone K24C1 (AHRD V1 *-*- Q9FH15_ARATH)	801.92	4.34	1440.08	8.41
1_1364_205(-),1_1364_226(-)	Solyc08g081980.2.1	Serine/threonine-protein kinase A-Raf (AHRD V1 *-** ARAF_PIG); contains Interpro domain(s) IPR010632 Protein of unknown function DUF1221	92.97	0.79	112.79	1.03
1_1364_205(-),1_1364_226(-)	Solyc10g079510.1.1	Helicase-like protein (AHRD V1 *-*- Q383Z6_9TRYP); contains Interpro domain(s) IPR013020 DNA helicase (DNA repair), Rad3 type	120.25	0.82	127.94	0.95
1_1364_205(-),1_1364_226(-),1_3182_143(+),1_541_115(+),1_541_178(+),1_541_619(+),10_1305_229(+),11_127_91(+),11_1518_250(+),2_526_102(+),2_526_163(-),2_526_226(-),4_44_81(+),5_328_481(+),5_328_586(+),6_61_561(-),6_62_375(+),8_2183_86(+),9_1348_8443(+),9_1750_102(+)	Solyc08g077500.2.1	Vacuolar protein sorting-associated protein (AHRD V1 *-*- D3BBX0_POLPA); contains Interpro domain(s) IPR001849 Pleckstrin homology	557.39	1.25	434.76	1.05
1_1364_205(-),1_1364_226(-),1_541_155(-),11_1518_166(+),11_2273_1539(+),11_2522_1482(+),11_874_165(+),12_98_449(+),4_44_438(+),5_328_481(+),6_61_521(+),6_61_561(-),8_303_452(+)	Solyc03g082680.2.1	Neuroblastoma-amplified protein-like protein (AHRD V1 *-*- D2V0U7_NAEGR); contains Interpro domain(s) IPR011046 WD40 repeat-like	1735.07	5.96	2121.98	7.86
1_1364_205(-),1_1364_226(-),12_434_1092(-),8_2337_173(-),9_1348_8212(+)	Solyc10g051110.1.1	NAD dependent epimerase/dehydratase family protein (AHRD V1 *--- B0CAN3_ACAM1); contains Interpro domain(s) IPR016040 NAD(P)-binding domain	8303.89	96.29	8843.9	110.61
1_1364_205(-),1_1364_226(-),2_526_331(-),4_44_165(+),6_1500_266(+),6_61_162(-)	Solyc04g015970.2.1	ATP-binding cassette 1 (AHRD V1 *-*- Q80ZB2_RAT); contains Interpro domain(s) IPR003439 ABC transporter-like	1953.34	8.07	2253.83	10.04
1_1364_205(-),1_1364_226(-),2_526_81(+),6_1497_376(+),8_2337_173(-)	Solyc05g055330.2.1	ATP-binding cassette transporter (AHRD V1 ***- D8RL77_SELML); contains Interpro domain(s) IPR013525 ABC-2 type transporter	919.36	5.01	691.75	4.06
1_1364_205(-),1_1364_226(-),6_62_142(-),8_2337_341(-),8_773_246(+)	Solyc04g080980.2.1	Coatomer alpha subunit-like protein (AHRD V1 **-- Q70I39_LOTJA); contains Interpro domain(s) IPR016391 Coatomer, alpha subunit	4981.88	30.24	5258.23	34.42
1_1364_205(-),1_1364_226(-),8_2337_322(+)	Solyc05g013490.2.1	Unknown Protein (AHRD V1)	2076.47	5.54	2780.11	8
1_1364_205(-),1_1364_226(-),9_1348_8443(+)	Solyc07g053610.2.1	Homeobox protein (AHRD V1 *--- D6BV21_ORYSJ); contains Interpro domain(s) IPR018500 DDT subgroup	3897.59	17.11	4900.49	23.21
1_1364_249(+)	Solyc01g080440.1.1	Unknown Protein (AHRD V1)	0	0	0	0
1_1364_249(+)	Solyc02g090230.2.1	Nucleoporin p58/p45 (AHRD V1 ***- B4FHB0_MAIZE)	524.46	6.2	547.96	6.99
1_1364_249(+)	Solyc11g008340.1.1	Exocyst complex component 4 (AHRD V1 *-*- B0W348_CULQU); contains Interpro domain(s) IPR007191 Sec8 exocyst complex component specific domain	2240.33	15.21	2567.25	18.81
1_1364_249(+),11_131_361(+),11_1518_166(+),11_1518_229(+),12_434_1052(+),12_85_97(-),2_526_102(+),4_44_268(-),4_44_81(+),5_328_208(+),6_62_375(+),7_1754_218(+),8_2337_341(-),8_2915_331(+),9_1348_8212(+),9_1348_8443(+)	Solyc09g065700.2.1	Beige/BEACH domain containing protein (AHRD V1 *--- A8PYX1_BRUMA); contains Interpro domain(s) IPR000409 Beige/BEACH	2956.79	6.85	3819.73	9.54
1_276_220(+),1_541_113(-),1_541_134(-),1_541_136(+),1_541_155(-),1_541_197(-),11_131_361(+),11_1518_166(+),11_1518_229(+),12_434_1052(+),12_85_97(-),2_526_226(-),4_44_438(+),5_28_495(+),5_328_208(+),5_328_481(+),6_1500_266(+),6_61_162(-),6_62_249(+),6_62_375(+),7_1754_134(+),7_1754_218(+),8_2337_322(+),8_2337_341(-),9_1024_157(+),9_1348_8170(+),9_1348_8443(+),9_1750_81(+)	Solyc02g089260.2.1	E3 ubiquitin-protein ligase UBR4 (AHRD V1 *--- UBR4_HUMAN); contains Interpro domain(s) IPR013993 Zinc finger, N-recognin, metazoa	9553.49	15.39	12554.3	21.81
1_276_220(+),10_1305_418(+),9_1024_157(+)	Solyc01g008350.2.1	DNAJ heat shock N-terminal domain-containing protein-like (AHRD V1 ***- Q5QMD6_ORYSJ)	30.97	0.24	57.98	0.48
1_276_220(+),11_131_361(+),2_526_144(+),4_44_438(+),5_328_208(+),5_328_481(+),9_1024_157(+)	Solyc01g094620.2.1	Mediator of RNA polymerase II transcription subunit 12 (AHRD V1 *--- B2G3S6_ZYGRO); contains Interpro domain(s) IPR019035 Mediator complex, subunit Med12	1528.47	5.33	2029.63	7.63
1_276_220(+),2_526_144(+),5_328_395(-),9_1024_157(+)	Solyc06g069440.2.1	Zinc finger CCCH domain-containing protein 55 (AHRD V1 *-*- C3H55_ORYSJ)	1097.4	6.15	1104.76	6.68
1_276_220(+),6_62_142(-),7_1754_195(-),9_1024_157(+)	Solyc02g090760.2.1	Os03g0395600 protein (Fragment) (AHRD V1 *-*- Q0DRD1_ORYSJ)	3623.78	12.27	4071.76	14.87
1_276_220(+),9_1024_157(+)	Solyc01g081320.2.1	Pentatricopeptide repeat-containing protein (AHRD V1 ***- D7M643_ARALY); contains Interpro domain(s) IPR002885 Pentatricopeptide repeat	321.47	4.4	379.97	5.61
1_276_577(+),1_3183_303(+),1_541_134(-),1_541_155(-),1_541_239(-),1_541_470(-),1_541_619(+),1_541_94(+),10_1305_395(-),11_127_91(+),11_1518_166(+),11_2273_1539(+),11_874_543(+),12_434_1052(+),12_434_1176(-),12_85_97(-),12_98_449(+),2_526_102(+),2_526_144(+),2_526_249(+),2_526_331(-),2_526_438(+),2_526_625(-),2_526_774(+),4_44_165(+),4_44_373(-),4_44_438(+),4_44_81(+),4_47_1305(-),5_2025_10490(+),…	Solyc01g110040.2.1	Transducin family protein (AHRD V1 ***- D7L1V6_ARALY)	322.67	0.43	435.78	0.63
1_276_577(+),1_541_134(-),1_541_197(-),1_541_470(-),1_541_619(+),11_131_361(+),11_1518_166(+),11_1518_229(+),12_98_449(+),2_526_102(+),2_526_163(-),2_526_226(-),2_526_331(-),2_526_394(-),2_526_625(-),4_44_165(+),4_44_438(+),4_44_81(+),5_28_325(-),5_328_586(+),6_1497_500(-),6_1500_266(+),6_1500_369(-),6_1500_453(-),6_61_162(-),6_62_375(+),7_1754_195(-),9_1348_8170(+),9_1348_8441(-),9_1348_8443(+),…	Solyc04g072260.1.1	Midasin (AHRD V1 ***- B9MXW7_POPTR); contains Interpro domain(s) IPR012099 Midasin	480.96	0.81	611.31	1.11
1_276_577(+),1_541_619(+),11_1518_166(+),2_526_249(+)	Solyc12g098780.1.1	Pistil extensin like protein (Fragment) (AHRD V1 *-*- Q40552_TOBAC); contains Interpro domain(s) IPR006041 Pollen Ole e 1 allergen and extensin	3.03	0.05	2.1	0.03
1_276_577(+),1_541_619(+),2_526_249(+)	Solyc04g071080.1.1	Unknown Protein (AHRD V1); contains Interpro domain(s) IPR006706 Extensin-like region	0	0	0	0
1_276_577(+),5_328_395(-),8_2337_322(+),9_1750_102(+),9_1750_81(+)	Solyc07g005480.2.1	Formin 2B (AHRD V1 *-*- C7BGM9_PHYPA); contains Interpro domain(s) IPR015425 Actin-binding FH2	57.21	0.27	97.19	0.49
1_276_724(+)	Solyc06g010220.1.1	Chromodomain helicase DNA binding protein 3 (Fragment) (AHRD V1 *--- B1AR16_MOUSE); contains Interpro domain(s) IPR019787 Zinc finger, PHD-finger	0	0	0	0
1_276_724(+),1_541_136(+),1_541_619(+),10_1305_271(+),10_1305_418(+),11_131_361(+),11_142_4505(+),12_85_97(-),2_526_226(-),2_526_331(-),2_526_438(+),5_28_325(-),5_328_668(-),6_1500_390(-),6_61_162(-),6_62_228(+),7_1754_218(+),8_2337_322(+),8_773_223(-),9_1348_8212(+)	Solyc02g083900.2.1	Serine/threonine-protein kinase TEL1 (AHRD V1 *--- ATM_CANGA); contains Interpro domain(s) IPR003151 PIK-related kinase, FAT	6901.14	14.26	12600.7	28.08
1_276_724(+),12_85_97(-),7_1754_218(+),9_1348_8044(+)	Solyc05g017890.2.1	THO complex subunit 2 (AHRD V1 *-*- B0XJB9_CULQU)	2425.42	10.28	2746.71	12.56
1_3182_143(+)	Solyc01g080360.2.1	MHD domain-containing death-inducing protein (AHRD V1 *--- MUDEN_HUMAN); contains Interpro domain(s) IPR008968 Clathrin adaptor, mu subunit, C-terminal	451.46	3.86	488.21	4.5
1_3182_143(+)	Solyc01g098120.2.1	Unknown Protein (AHRD V1)	2.07	0.04	0.85	0.02
1_3182_143(+)	Solyc03g115250.2.1	Genomic DNA chromosome 5 P1 clone MXM12 (AHRD V1 *-*- Q9SD86_ARATH)	1406.91	6.31	1577.51	7.63
1_3182_143(+)	Solyc11g071500.1.1	MYB transcription factor (AHRD V1 *-*- Q9FNN6_ARATH); contains Interpro domain(s) IPR006447 Myb-like DNA-binding region, SHAQKYF class	135.41	1.86	147.3	2.18
[truncated: 2,148 more rows]
